# Supplementary material for: How do undergraduate nursing students learn in the hospital setting? A scoping review of conceptualisations, operationalisations and learning activities
Source: PubMed Central journal article supplement — BMJ Open. 2019 Dec 8;9(12):e029397. doi: 10.1136/bmjopen-2019-029397 (PMC6924761; doi:10.1136/bmjopen-2019-029397), 2019-12-08
Supplement: bmjopen-2019-029397.draft_revisions.pdf [file bmjopen-2019-029397.draft_revisions.pdf]

# BMJ Open

BMJ Open is committed to open peer review. As part of this commitment we make the peer review history of every article we publish publicly available.

When an article is published we post the peer reviewers' comments and the authors' responses online. We also post the versions of the paper that were used during peer review. These are the versions that the peer review comments apply to.

The versions of the paper that follow are the versions that were submitted during the peer review process. They are not the versions of record or the final published versions. They should not be cited or distributed as the published version of this manuscript.

BMJ Open is an open access journal and the full, final, typeset and author-corrected version of record of the manuscript is available on our site with no access controls, subscription charges or pay-per-view fees (<http://bmjopen.bmj.com>).

If you have any questions on BMJ Open's open peer review process please email [info.bmjopen@bmj.com](mailto:info.bmjopen@bmj.com)

# BMJ Open

## How do undergraduate nursing students learn in the hospital setting? A scoping review of conceptualisations, operationalisations and learning activities.

|                               |                                                                                                                                                                                                                                                                                                                                                                                                                                                                                                                                                                                                                                                                                                                                                                                                                                                                                                                                                                                                                                                   |
|-------------------------------|---------------------------------------------------------------------------------------------------------------------------------------------------------------------------------------------------------------------------------------------------------------------------------------------------------------------------------------------------------------------------------------------------------------------------------------------------------------------------------------------------------------------------------------------------------------------------------------------------------------------------------------------------------------------------------------------------------------------------------------------------------------------------------------------------------------------------------------------------------------------------------------------------------------------------------------------------------------------------------------------------------------------------------------------------|
| Journal:                      | <i>BMJ Open</i>                                                                                                                                                                                                                                                                                                                                                                                                                                                                                                                                                                                                                                                                                                                                                                                                                                                                                                                                                                                                                                   |
| Manuscript ID                 | bmjopen-2019-029397                                                                                                                                                                                                                                                                                                                                                                                                                                                                                                                                                                                                                                                                                                                                                                                                                                                                                                                                                                                                                               |
| Article Type:                 | Research                                                                                                                                                                                                                                                                                                                                                                                                                                                                                                                                                                                                                                                                                                                                                                                                                                                                                                                                                                                                                                          |
| Date Submitted by the Author: | 24-Jan-2019                                                                                                                                                                                                                                                                                                                                                                                                                                                                                                                                                                                                                                                                                                                                                                                                                                                                                                                                                                                                                                       |
| Complete List of Authors:     | Stoffels, Malou; Amsterdam UMC, Vrije Universiteit Amsterdam, VUmc School of Medical Sciences, Department of Research in Education; Amsterdam UMC, Vrije Universiteit Amsterdam, Amstel Academie Peerdeman, Saskia; Amsterdam UMC, Vrije Universiteit Amsterdam, VUmc School of Medical Sciences, Department of Research in Education; Amsterdam UMC, Vrije Universiteit Amsterdam, Department of Neurosurgery<br>Daelmans, Hester; Amsterdam UMC, Vrije Universiteit Amsterdam, VUmc School of Medical Sciences, Department of Research in Education; Amsterdam UMC, Vrije Universiteit Amsterdam, VUmc School of Medical Sciences, Department of Skills Training<br>Ket, J.C.F. ; Amsterdam UMC, Vrije Universiteit Amsterdam, VUmc School of Medical Sciences, Medical Library<br>Kusurkar, Rashmi; Amsterdam UMC, Vrije Universiteit Amsterdam, VUmc School of Medical Sciences, Department of Research in Education; Vrije Universiteit Amsterdam, Faculty of Psychology and Education, LEARN! Research institute for learning and education |
| Keywords:                     | Nursing, EDUCATION & TRAINING (see Medical Education & Training), MEDICAL EDUCATION & TRAINING, Clinical learning                                                                                                                                                                                                                                                                                                                                                                                                                                                                                                                                                                                                                                                                                                                                                                                                                                                                                                                                 |
|                               |                                                                                                                                                                                                                                                                                                                                                                                                                                                                                                                                                                                                                                                                                                                                                                                                                                                                                                                                                                                                                                                   |

SCHOLARONE™  
Manuscripts

1  
2  
3 **How do undergraduate nursing students learn in the hospital setting? A**  
4 **scoping review of conceptualisations, operationalisations and learning**  
5 **activities.**  
6  
7  
8  
9

10  
11  
12  
13 Malou Stoffels<sup>1,2</sup>; Saskia M. Peerdeman<sup>1,3,4</sup>; Hester E.M. Daelmans<sup>1,5</sup>; Johannes C.F. Ket<sup>6</sup>; Rashmi A.  
14 Kusurkar<sup>1,7</sup>.  
15

16  
17 **Correspondence**  
18

19  
20 Correspondence should be addressed to Malou Stoffels, Amsterdam UMC, Vrije Universiteit  
21 Amsterdam, Department of Research in Education, PO box 7057, 1007 MB Amsterdam, the  
22 Netherlands; telephone: +31204446241; e-mail: m.stoffels@vumc.nl.  
23  
24

25  
26 <sup>1</sup> Amsterdam UMC, Vrije Universiteit Amsterdam, VUmc School of Medical Sciences, Department of  
27 Research in Education, Amsterdam, the Netherlands  
28

29 <sup>2</sup>Amsterdam UMC, VUmc Amstel Academy, Amsterdam, the Netherlands  
30

31 <sup>3</sup>Amsterdam UMC, Vrije Universiteit Amsterdam, Department of neurosurgery, Amsterdam, the  
32 Netherlands  
33

34 <sup>4</sup> Amsterdam UMC, Univ of Amsterdam, Faculty of Medicine, Amsterdam, the Netherlands  
35

36 <sup>5</sup>Amsterdam UMC, Vrije Universiteit Amsterdam, VUmc school of Medical Sciences, Department of  
37 Skills Training, Amsterdam, the Netherlands  
38

39 <sup>6</sup>Amsterdam UMC, Vrije Universiteit Amsterdam, VUmc School of Medical Sciences, Medical Library,  
40 Amsterdam, the Netherlands  
41

42 <sup>7</sup>Vrije Universiteit Amsterdam, Faculty of Psychology and Education, LEARN! Research Institute for  
43 Learning and Education, Amsterdam, the Netherlands  
44  
45  
46  
47  
48

49 **Word count**  
50

51 4030  
52  
53

54 **Key words**  
55

56  
57 Undergraduate nursing education, learning in practice  
58  
59  
60

## ABSTRACT

**Objectives.** This study aimed to provide insight in conceptualisations of 'learning in practice' in the nursing education literature, as well as in their operationalisations and outcomes in terms of learning activities. The eventual aim was to propose terminology to guide future studies.

**Design** The scoping framework proposed by Arksey and O'Malley was used. In a first systematic search, concepts equivalent to 'learning in practice' were identified. In a second search, studies operationalising these concepts were searched in PubMed, EBSCO/ERIC and EBSCO/CINAHL. Eligible articles were studies that examined the regular learning of undergraduate nursing students in the hospital setting. Conceptualisations, theoretical frameworks and operationalisations were mapped descriptively. Results relating to how students learn in clinical practice were synthesized using thematic analysis. Quality assessment of the studies was performed using the CASP checklist.

**Results** From 9360 abstracts, 17 articles were included. Five studies adopted as their object of study a general, yet not explained, synonym for learning in practice, the other studies approached the topic focusing on the social, unplanned, or active nature of learning. All studies used a qualitative approach. The small number of studies and medium study quality hampered a thorough comparison of concepts. The synthesis of study results revealed five types of learning activities, in which increasing autonomy, interactions, and cognitive processing were central themes. These themes were acknowledged by an expert panel.

**Conclusions** The current body of literature offers little guidance on which concepts to use to study clinical learning in undergraduate nursing education. The reviewed studies show agreement about the key elements of clinical learning. In future research, formal and informal components of learning should be addressed, and clarity about desirable outcomes of clinical learning should be provided. Also, the interplay between behaviour and cognitive processing in clinical learning should be further investigated.

## ARTICLE SUMMARY

Strengths and limitations of this study

- This study followed a rigorous design, using an established research framework, a comprehensive two-step search strategy and a well-documented selection process.
- The analysis of both conceptualisations, study quality and study results allowed for the identification of quantitative and qualitative gaps in the literature.
- A limitation is that the literature search only covered undergraduate nursing education in the hospital setting, while a comparison with literature on learning in practice in other health professions would enrich our understanding of potential conceptualizations.

## INTRODUCTION

Learning in the clinical setting is crucial for becoming a competent nurse<sup>1</sup>. However, although a vast body of knowledge exists on factors that influence learning, the process itself remains underexposed in the literature<sup>2</sup>. Understanding learning in the clinical setting can help design, supervise and evaluate individual learning trajectories. In the nursing education literature, just as in other health professions education literature, different terms are used to describe and study learning in clinical practice, with different underlying theoretical or conceptual frameworks.

This study aimed to examine how different concepts that are equivalent to 'learning in practice' are operationalised in the literature about undergraduate nursing students' learning in clinical placements. Another aim was to propose terminology to guide future studies. Finally, we aimed to synthesize study results that directly relate to how nursing students learn in clinical practice. To our knowledge, the only study that included distinct concepts of clinical learning in the health setting in a review before, was a concept analysis of work-based learning in health care education from 2009<sup>3</sup>. The authors identified common attributes, enabling factors and consequences of workplace learning and proposed a definition. The current review built on this work by critically examining the use of these concepts within the context of undergraduate nursing education and analysing their outcomes.

To enable comparison between studies, we focused on undergraduate students in the general hospital setting. This context is the traditional setting for nursing training and comprises a variety of factors that may be relevant for learning, such as the presence of peers and different healthcare professionals, as well as complex and acute patients, thereby offering a wide array of multidimensional learning opportunities<sup>4</sup>. Moreover, we limited our study to undergraduate (also called bachelor, diploma or associate degree) education, which is the initial training that prepares for registration as a nurse, in which students learn the profession and shape their identity. As a final demarcation allowing for the comparison between concepts, we focused on studies about how students learn during their regular day to day work at the ward, instead of evaluations of specific interventions or models.

## METHODS AND ANALYSIS

The scoping review approach was chosen, as it can help understand complex concepts through clarifying definitions and conceptual boundaries<sup>5</sup> and enables to identify key concepts and gaps in the literature<sup>6</sup>. The approach developed by Arksey and O'Malley<sup>7</sup> and refined by Levac, et al.<sup>8</sup> and the Joanna Briggs institute<sup>9</sup> was used, consisting of the six stages (1) identifying the research question; (2) identifying relevant studies; (3) selecting studies; (4) charting the data; (5) collating, summarizing and reporting the results; (6) expert consultation. Reporting on this scoping review

1  
2  
3 followed the PRISMA Extension for Scoping Review checklist<sup>10</sup>, as outlined in supplementary file 1.  
4 The review followed an a priori developed research protocol, with Manuscript id bmjopen-2018-  
5 024360 (see supplementary file 2) with a little deviation by choosing the CASP checklist over the  
6 quality indicators of Buckley et al.<sup>11</sup> for quality assessment, as this allowed for more specific and  
7 systematic quality assessment. As anticipated, study questions and refined inclusion criteria were  
8 added during the search process.  
9  
10  
11  
12

### 13 14 Stage 1. Identifying the research question

15 The original research question was:

- 16  
17  
18 - How are different concepts that are used as an equivalent to learning in the hospital setting  
19 operationalised in the undergraduate nursing education literature?  
20  
21

22 To which the following question was added to guide our analysis of results:

- 23  
24 - Which activities do undergraduate nursing students learn from in the clinical setting?  
25  
26

### 27 Stage 2. Identify relevant studies

28 As suggested by the Joanna Briggs institute<sup>9</sup>, a comprehensive search strategy was iteratively  
29 developed (by MS and JCFK) following the Peer Review of Electronic Search Strategies (PRESS) 2015  
30 guideline statement<sup>12</sup>, starting with a broad search (search step 1) to inform the subsequent search  
31 strategy (search step 2). The different search queries were first developed for PubMed and later  
32 extended to EBSCO/ERIC and EBSCO/CINAHL. See our search strategy for both steps in  
33 supplementary file 3.  
34  
35  
36  
37

38 In search step 1, from inception to May 2018 the terms 'learning in clinical practice' and  
39 'undergraduate nursing students' were combined to identify concepts that are used as an equivalent  
40 to 'learning in clinical practice' and could be included in the second search step. Eligible concepts  
41 were those relating to the process of clinical learning rather than specific aspects of it or associated  
42 factors. The first 200 abstracts were scanned by the two reviewers (MS and RAK) on potentially  
43 eligible concepts. As the researchers reached full agreement, the first reviewer screened the rest of  
44 the abstracts. After all abstracts had been screened, all concepts were discussed between the two  
45 reviewers and a final selection of concepts to be included in the second search step was made. Other  
46 concepts coming up during the search and selection process that appeared eligible, were added to  
47 the selection of concepts after discussion between the reviewers. See supplementary file 4 for  
48 concepts and reason for inclusion/exclusion in the second search step.  
49  
50  
51  
52  
53  
54  
55  
56  
57

58 In search step 2, between May and September 2018 each of the identified concepts was combined  
59 with 'undergraduate nursing students' to find studies operationalizing these concepts in the  
60

1  
2  
3 literature about nursing students' learning in practice. After these two searches, reference lists were  
4 checked for additional publications.  
5  
6

### 7 Stage 3. Study selection

8 Two researchers (MS and RAK) independently screened abstracts from search step 2 and assessed  
9 the eligibility for full text retrieval. Selected full-text studies were compared between the reviewers  
10 with disagreements being resolved through discussion and consensus and with input from the full  
11 research team.  
12  
13  
14

15  
16  
17 The inclusion criteria were developed iteratively. The initial inclusion criteria were:

- 18 - Original research or reviews in peer reviewed journals that have learning in undergraduate  
19 clinical nursing practice in the hospital setting as one of their main topics, regardless of  
20 publication date and type of article.  
21  
22 - Studies that examine how students learn in the clinical hospital setting  
23  
24  
25  
26  
27

28 In line with the aim of the study, the inclusion criteria were refined to:

- 29 - Original research or reviews in peer reviewed journals, regardless of publication date type of  
30 article and study quality, that examine the learning of undergraduate nursing students in the  
31 clinical hospital setting as it regularly occurs  
32  
33  
34  
35

36 Resulting in the following exclusion criteria:

37 Studies:

- 38 - evaluating organizational models or interventions  
39  
40 - about factors influencing learning in clinical practice, including supervision styles, teaching  
41 methods and clinical learning environment  
42  
43 - outside the general hospital setting  
44  
45 - about very specific student populations, patient populations or settings (e.g. palliative care)  
46 generating results that might be limited to that setting  
47  
48 - about interprofessional learning  
49  
50 - about the acquisition of specific skills  
51  
52 - about student's 'experience' of clinical learning *without explicit reference to the learning*  
53 *process.*  
54  
55  
56  
57  
58  
59  
60

1  
2  
3 As the study aim was to examine how learning in practice is operationalised in peer-reviewed  
4 research, books, book reviews, commentaries, letters to the editor, PhD theses, and reports were  
5 excluded.  
6  
7

#### 9 Stage 4. Charting the data

10 Selected studies were documented including study characteristics (year, country, methodology,  
11 study question, study design, participants, outcomes, study quality), conceptualisation of learning in  
12 practice (definitions, theoretical underpinnings/rationale, operationalisations), results, learning  
13 activities, and study quality. Although formal assessment of study quality is generally not performed  
14 in scoping reviews<sup>9</sup>, this is subject to debate<sup>6</sup>. Quality assessment of included studies by the Critical  
15 Appraisal Skills Programme (CASP)<sup>13</sup> was decided upon to address qualitative gaps in the literature<sup>8</sup>.  
16  
17  
18  
19

#### 21 Stage 5. Collating, summarizing and reporting results

22 Data were analysed in two ways. First, descriptive account of concepts, theories, subsequent  
23 operationalisations and study quality were given and compared. Second, a data driven thematic  
24 analysis of the outcomes of the studies that are relevant for our research questions was conducted  
25 (Dixon-Woods, Agarwal, Jones, Young, & Sutton, 2005). To select those outcomes, first learning  
26 activities were separated from other study results by going through the result sections of the studies  
27 and underlining findings (themes, observations, quotes) that referred to how nursing students learn  
28 in the hospital setting. When possible, the used the original wording was used, when necessary we  
29 rephrased before further analysis. These findings were categorized using open coding, resulting in six  
30 classes of activities. All the results were compared and consolidated through consensus between MS  
31 and RAK.  
32  
33  
34  
35  
36  
37  
38  
39

#### 41 Stage 6. Expert consultation

42 In order to confirm our findings, we presented our analysis of the learning activities to four experts of  
43 different institutions in the Netherlands (one senior clinical educator, one coordinator of clinical  
44 education, one head of nursing education department, and coordinator of nursing education) and  
45 asked them whether these findings matched with their perspective on clinical learning.  
46  
47  
48  
49  
50  
51  
52  
53  
54  
55  
56  
57  
58  
59  
60



## RESULTS

### Search results

This initial search to identify concepts yielded 7211 abstracts, of which 5658 remained after removing duplicates. As the two reviewers (MS and RAK) reached full agreement on potentially eligible concepts after screening the first 200 abstracts, the remaining abstracts were screened by MS only. Seventy potentially eligible concepts were extracted. After discussion between the reviewers, 22 concepts were selected, to which three concepts were added later in the process, so the second search was run with 25 different concepts. See supplementary file 4 for concepts and reason for inclusion/exclusion in search step 2. The second search, using the 25 concepts selected in the initial search, generated 9360 results of which 5880 remained after duplicates were removed. For both abstracts and full texts, RAK and MS independently applied inclusion criteria and subsequently discussed their findings, resulting in the selection of 83 abstracts for full text reading and the inclusion of 17 studies (see supplementary file 5 for excluded full texts and reason for exclusion). Three pairs of studies were based on (partly) overlapping data<sup>14-19</sup>, but were all included as the results only partly overlapped. Reference list screening of the full text articles did not generate any extra results. See Figure 1 For a flow diagram of search step 2.

### General study characteristics

All included studies examined the process of undergraduate nursing students' learning in the clinical setting, as a result of their primary aim or as a significant secondary finding of a broader research question. Six of the studies<sup>16-21</sup> investigated undergraduate nursing students' learning in both the classroom setting and the clinical setting. One of the studies included not only nursing students, but also midwifery and social work students<sup>22</sup>. However, results relevant to our research question could be separated from other findings. All were primary studies, of which sixteen were qualitative studies, and one mixed methods<sup>19</sup>. Publication year ranged from 1987-2018. Studies were conducted in different countries in Europe, Middle East, North America and Oceania.

### Study quality

Table 1 shows the quality of the included studies as assessed with the Critical Appraisal Skills Programme (CASP)<sup>13</sup> tool. The mixed method study<sup>19</sup> was also appraised with the CASP, as its focus was on the qualitative data. To summarize, in the majority of studies it was unclear how the results answered the research question, because of a lack of clear aims, lack of clear operationalization, or both, in spite of clear descriptions of the process of data analysis and its outcomes.

|                                                                                      | Baraz, et al. <sup>23</sup> | Burnard <sup>18</sup> | Burnard <sup>19</sup> | Carey, et al. <sup>24</sup> | Dadgaran, et al. <sup>25</sup> | Gidman <sup>22</sup> | Grealish and Ranse <sup>26</sup> | Green and Holloway <sup>20</sup> | Kear <sup>16</sup> | Kear <sup>17</sup> | Manninen <sup>14</sup> | Manninen, et al. <sup>15</sup> | Mays on and Hayward <sup>27</sup> | Rober ts <sup>28</sup> | Seylani, et al. <sup>21</sup> | Stock haus en <sup>29</sup> | Winds or <sup>30</sup> |
|--------------------------------------------------------------------------------------|-----------------------------|-----------------------|-----------------------|-----------------------------|--------------------------------|----------------------|----------------------------------|----------------------------------|--------------------|--------------------|------------------------|--------------------------------|-----------------------------------|------------------------|-------------------------------|-----------------------------|------------------------|
| Was there a clear statement of the aims of the research?                             | yes                         | No                    | yes                   | yes                         | no                             | yes                  | yes                              | No                               | no                 | no                 | no                     | yes                            | yes                               | yes                    | no                            | yes                         | yes                    |
| Is a qualitative methodology appropriate?                                            | yes                         | Yes                   | yes                   | yes                         | yes                            | yes                  | yes                              | yes                              | yes                | yes                | yes                    | yes                            | yes                               | yes                    | yes                           | yes                         | yes                    |
| Was the research design appropriate to address the aims of the research?             | yes                         | can't tell            | yes                   | yes                         | no                             | yes                  | Can't tell                       | Can't tell                       | yes                | Can't tell         | yes                    | yes                            | yes                               | yes                    | no                            | yes                         | yes                    |
| Was the recruitment strategy appropriate to the aims of the research?                | yes                         | can't tell            | yes                   | yes                         | can't tell                     | yes                  | can't tell                       | can't tell                       | yes                | can't tell         | can't tell             | can't tell                     | can't tell                        | can't tell             | yes                           | no                          | no                     |
| Was the data collected in a way that addressed the research issue?                   | yes                         | can't tell            | can't tell            | yes                         | yes                            | can't tell           | yes                              | Can't tell                       | Can't tell         | yes                | Can't tell             | yes                            | yes                               | yes                    | Can't tell                    | yes                         | yes                    |
| Has the relationship between researcher and participants been adequately considered? | no                          | can't tell            | can't tell            | yes                         | no                             | yes                  | yes                              | No                               | no                 | no                 | no                     | can't tell                     | yes                               | can't tell             | no                            | no                          | no                     |
| Have ethical issues been taken into consideration?                                   | yes                         | can't tell            | Can't tell            | yes                         | yes                            | yes                  | can't tell                       | no                               | yes                | can't tell         | can't tell             | yes                            | yes                               | yes                    | yes                           | yes                         | no                     |
| Was the data analysis sufficiently rigorous?                                         | yes                         | Yes                   | yes                   | yes                         | yes                            | yes                  | yes                              | yes                              | yes                | yes                | can't tell             | yes                            | yes                               | can't tell             | yes                           |                             | yes                    |
| Is there a clear statement of findings?                                              | yes                         | Yes                   | No                    | yes                         | no                             | yes                  | yes                              | no                               | yes                | yes                | no                     | yes                            | yes                               | yes                    | yes                           | yes                         | yes                    |

Table 1. quality of the included studies as assessed with the Critical Appraisal Skills Programme (CASP)<sup>13</sup> tool

## Concepts, operationalisations and learning activities

Table 1 summarizes the main concepts, operationalisations, frameworks, findings and learning activities of the 17 selected studies. Findings concerning conceptualisation and operationalisation as well as the results concerning learning activities will be discussed in the following paragraphs.

|                                    | Conceptualisation                                                                                |                                                                                                                                               |                                                                                                      | Operationalization                                                                    | results                                                                                                        |                                                                                                                                                                                                                                                                                                                                                                                                                                                                                                                                                                                                                                                                                                                            |
|------------------------------------|--------------------------------------------------------------------------------------------------|-----------------------------------------------------------------------------------------------------------------------------------------------|------------------------------------------------------------------------------------------------------|---------------------------------------------------------------------------------------|----------------------------------------------------------------------------------------------------------------|----------------------------------------------------------------------------------------------------------------------------------------------------------------------------------------------------------------------------------------------------------------------------------------------------------------------------------------------------------------------------------------------------------------------------------------------------------------------------------------------------------------------------------------------------------------------------------------------------------------------------------------------------------------------------------------------------------------------------|
|                                    | Main term(s) used to describe learning in practice<br><i>definition, if provided, in italics</i> | Main concept studied<br><i>Definition, if provided, in italics</i>                                                                            | Theoretical or conceptual framework for interpreting results/explicit reference to learning theories | Summary of operationalization                                                         | Findings reported by the authors                                                                               | Learning activities for nursing students in the hospital setting extracted by the reviewers                                                                                                                                                                                                                                                                                                                                                                                                                                                                                                                                                                                                                                |
| Baraz, Memarian, and Vanaki (2014) | Learning process in clinical setting                                                             | Learning styles in clinical setting<br><i>Individual's preferred methods of knowledge and skill acquisition and information organization.</i> | No theoretical framework, used, reference to Kolb's stages of experiential learning                  | Semi-structured interviews about what and how students learn in the clinical setting. | Three clinical learning styles<br>1. Thoughtful observation<br>2. Learning by doing<br>3. Learning by thinking | <ul style="list-style-type: none"> <li>- careful observation of role models performance</li> <li>- reflective observation during clinical rounds</li> <li>- Participating in medical rounds clinical rounds</li> <li>- nursing rounds by instructors and classmates</li> <li>- active involvement in procedures caring for sensitive patients</li> <li>- Active collaboration with peers</li> <li>- maintaining continuity by making active patient contact and repeating nursing procedures</li> <li>- assuming responsibility for patient care</li> <li>- memorizing info by history taking</li> <li>- accountability for clinical homework</li> <li>- inquiring staff and peers</li> <li>- critical thinking</li> </ul> |

|                                              |                                                                                                        |                                                                                                                                                                                                                                                                                             |                                                                                     |                                                                                                                                        |                                                                                                                                                                                                                                                                   |                                                                                                                                                                                                                                    |
|----------------------------------------------|--------------------------------------------------------------------------------------------------------|---------------------------------------------------------------------------------------------------------------------------------------------------------------------------------------------------------------------------------------------------------------------------------------------|-------------------------------------------------------------------------------------|----------------------------------------------------------------------------------------------------------------------------------------|-------------------------------------------------------------------------------------------------------------------------------------------------------------------------------------------------------------------------------------------------------------------|------------------------------------------------------------------------------------------------------------------------------------------------------------------------------------------------------------------------------------|
|                                              |                                                                                                        |                                                                                                                                                                                                                                                                                             |                                                                                     |                                                                                                                                        |                                                                                                                                                                                                                                                                   | - monitoring, critiquing, avoiding unsafe practice                                                                                                                                                                                 |
| <b>Burnard (1992b)</b>                       | Clinical experiences                                                                                   | Experiential learning ' <i>experiential learning</i> ' has been used to describe many different sorts of educational approaches ranging from the use of interactive group strategies) to accrediting people for their life experience when considering those people for entrance to courses | No theoretical framework, used, reference to Kolb's stages of experiential learning | In depth interviews about how students perceive experiential learning                                                                  | Definitions of experiential learning:<br>a. something more than just being taught<br>b. something that you use when you use your own experience<br>c learning in the clinical setting                                                                             | - just doing<br>- just being there<br>- learning by seeing<br>- selecting one of the nurses as a role model<br>- being personally involved and immersed in the learning situation                                                  |
| <b>Burnard (1992a)</b>                       | Clinical experiences                                                                                   | Experiential learning<br><br>No definition provided with justification: ' <i>it appears that the term can be used by different people in different ways</i> '                                                                                                                               | No theoretical framework, used, reference to Kolb's stages of experiential learning | Interviews about how students and tutors experience experiential learning and questionnaire about perceptions of experiential learning | Experiential learning<br>1. is learning by doing<br>2. is personal learning<br>3. involves reflection<br>Students mostly relate experiential learning to learning in the clinical setting.                                                                        | - learning by taking part<br>- not only doing but also reflecting.<br>- observing role models                                                                                                                                      |
| <b>Carey, Chick, Kent, and Latour (2018)</b> | Learning in clinical settings/ learning within the clinical practice environment;<br>Clinical learning | Peer assisted learning<br><br><i>in which students acquire skills and knowledge through the active help provided by status equals or matched</i>                                                                                                                                            | -                                                                                   | Observation of interaction patterns between students                                                                                   | Three themes contributing to impact of peer assisted learning:<br>- peers as facilitators to develop learning<br>- working together as peers to develop clinical practice and deliver care<br>- positive support and interaction from peers to enhance networking | - watching demonstrations by other students<br>- asking questions<br>- seeking advice and guidance<br>- discussing development plans<br>- discussing practice standards<br>- challenging each other's knowledge<br>- Sharing roles |

|                                              |                       |                                       |                                                                                  |                                                                                                                                                                            |                                                                                                                                                                                                                                                                                                                                                                                                                                                                                                                                       |                                                                                                                                                                                                                                                                                                                                                                                                                                                                                                                                                                                                                                                                                                                                                            |
|----------------------------------------------|-----------------------|---------------------------------------|----------------------------------------------------------------------------------|----------------------------------------------------------------------------------------------------------------------------------------------------------------------------|---------------------------------------------------------------------------------------------------------------------------------------------------------------------------------------------------------------------------------------------------------------------------------------------------------------------------------------------------------------------------------------------------------------------------------------------------------------------------------------------------------------------------------------|------------------------------------------------------------------------------------------------------------------------------------------------------------------------------------------------------------------------------------------------------------------------------------------------------------------------------------------------------------------------------------------------------------------------------------------------------------------------------------------------------------------------------------------------------------------------------------------------------------------------------------------------------------------------------------------------------------------------------------------------------------|
|                                              |                       | <i>companions</i><br>(Topping, 2005). |                                                                                  |                                                                                                                                                                            | and develop working structure.                                                                                                                                                                                                                                                                                                                                                                                                                                                                                                        | <ul style="list-style-type: none"> <li>- sharing experiences of clinical practice</li> <li>- discussing challenges of finding one's way in the clinical environment</li> </ul>                                                                                                                                                                                                                                                                                                                                                                                                                                                                                                                                                                             |
| <b>Dadgaran, Parvizy, and Peyrovi (2012)</b> | Clinical learning     | Clinical learning                     | -                                                                                | semi-structured interviews about how students experience their clinical learning; subsequent observations of students in the clinical setting with a focus on interactions | <p>Five categories and one 'core variable':</p> <ol style="list-style-type: none"> <li>1. facing unfavourable clinical facts</li> <li>2. analysis of a clinical situation and appropriate decision making</li> <li>3. bridging the gap between practice and theory</li> <li>4. struggle for clinical independence</li> <li>5. Dynamism</li> <li>6. struggle to acquire clinical competence</li> </ol> <p>Two approaches to learning:</p> <ol style="list-style-type: none"> <li>1. Microlearning</li> <li>2. Macrolearning</li> </ol> | <ul style="list-style-type: none"> <li>- trying to figure out what regulations are and what they should be through detection of the environment</li> <li>- modify learning deficits to fight the feeling of being unable to answer questions</li> <li>- try to analyse the situation and make an appropriate decision</li> <li>- increase theoretical knowledge through reading books and asking questions</li> <li>- in the ward, review already learned materials (reconstructive thinking)</li> <li>- analysis of clinical issues (clinical reasoning)</li> <li>- making links between theory and practice</li> <li>- design care plans</li> <li>- organizing care on the basis of self-made care plans</li> <li>- doing tasks independently</li> </ul> |
| <b>Gidman (2013)</b>                         | Learning in practice, | Learning from patient stories         | No theoretical framework, used, reference to Eraut's theory on informal learning | Conversational interviews about students' perceptions of their learning experiences of listening to patient stories.                                                       | <ol style="list-style-type: none"> <li>1. Students value listening to stories for learning</li> <li>2. students develop relationships with patients</li> <li>3. students learn from the subjective and emotional perspective of patients</li> <li>4. students think back to their own personal stories when caring for</li> </ol>                                                                                                                                                                                                     | <ul style="list-style-type: none"> <li>- listening to patients' personal stories</li> <li>- building relationships with patient</li> <li>- listening to relatives of a patient</li> <li>- reflecting on personal experiences</li> </ul>                                                                                                                                                                                                                                                                                                                                                                                                                                                                                                                    |

|                                  |                                              |                                    |                                 |                                                                                    |                                                                                                                                                                                                                                                                                                                                                                                            |                                                                                                                                                                                                                                                                                                                                                                                                                                                                                                                                                                                                                                                                                                                                                                                                                                                                                                                                                                              |
|----------------------------------|----------------------------------------------|------------------------------------|---------------------------------|------------------------------------------------------------------------------------|--------------------------------------------------------------------------------------------------------------------------------------------------------------------------------------------------------------------------------------------------------------------------------------------------------------------------------------------------------------------------------------------|------------------------------------------------------------------------------------------------------------------------------------------------------------------------------------------------------------------------------------------------------------------------------------------------------------------------------------------------------------------------------------------------------------------------------------------------------------------------------------------------------------------------------------------------------------------------------------------------------------------------------------------------------------------------------------------------------------------------------------------------------------------------------------------------------------------------------------------------------------------------------------------------------------------------------------------------------------------------------|
|                                  |                                              |                                    |                                 |                                                                                    | patients<br>5. listening to stories has a positive impact on understanding patients and a commitment to patient care.                                                                                                                                                                                                                                                                      |                                                                                                                                                                                                                                                                                                                                                                                                                                                                                                                                                                                                                                                                                                                                                                                                                                                                                                                                                                              |
| <b>Grealish and Ranse (2009)</b> | learning in the workplace, clinical learning | Learning in the clinical workplace | Community of practice           | Students' written narratives about where they learned while on clinical placement. | Three thematic constructs, called 'learning triggers':<br>a. participation (or observation) of a task or procedure that leads to (takes them into) a complex, dramatic reading of nursing work<br>b. being personally (emotionally) confronted by the work (high challenge)<br>c. meeting nurses who contribute to the development of an image of what the students wants to be as a nurse | <ul style="list-style-type: none"> <li>- being involved in the practical aspects of caring for a patient</li> <li>- shifting focus from the task to the person</li> <li>- talking to patients' relatives</li> <li>- looking at the patient as a person, taking an interest in their needs</li> <li>- engaging in post-operative observations</li> <li>- assisting patients in little things</li> <li>- giving medications</li> <li>- Being personally (emotionally) confronted by the work</li> <li>- experiencing positive and negative emotions</li> <li>- taking responsibility</li> <li>- talking to patients</li> <li>- meeting nurses who contribute to the development as an image</li> <li>- identifying a resident nurse as a role model</li> <li>- receiving feedback from resident nurses</li> <li>- aligning personal practice with what is observed</li> <li>- working independently in a supportive surrounding</li> <li>- witnessing poor practice</li> </ul> |
| <b>Green and Holloway (1996)</b> | Learning in the clinical setting             | experiential learning              | No theoretical framework, used, | Non-directive interviews about students'                                           | 6 themes:<br>a. Students were able to define experiential learning, usually                                                                                                                                                                                                                                                                                                                | <ul style="list-style-type: none"> <li>- working with the client (including the intuitive element)</li> <li>- participating, interacting, shared</li> </ul>                                                                                                                                                                                                                                                                                                                                                                                                                                                                                                                                                                                                                                                                                                                                                                                                                  |

1  
2  
3  
4  
5  
6  
7  
8  
9  
10  
11  
12  
13  
14  
15  
16  
17  
18  
19  
20  
21  
22  
23  
24  
25  
26  
27  
28  
29  
30  
31  
32  
33  
34  
35  
36  
37  
38  
39  
40  
41  
42  
43  
44  
45  
46

1  
2  
3  
4  
5  
6  
7  
8  
9  
10  
11  
12  
13  
14  
15  
16  
17  
18  
19  
20  
21  
22  
23  
24  
25  
26  
27  
28  
29  
30  
31  
32  
33  
34  
35  
36  
37  
38  
39  
40  
41  
42  
43  
44  
45  
46

|                    |                     |                                                                                                                                                                                                                        |                                                     |                                                                        |                                                                                                                                                                                                                                                                                                                                                                                                                                                                                                                                                                                                                  |                                                                                                                                                                                                                                                                                                                                                                                                                                                                                                                                                                                      |
|--------------------|---------------------|------------------------------------------------------------------------------------------------------------------------------------------------------------------------------------------------------------------------|-----------------------------------------------------|------------------------------------------------------------------------|------------------------------------------------------------------------------------------------------------------------------------------------------------------------------------------------------------------------------------------------------------------------------------------------------------------------------------------------------------------------------------------------------------------------------------------------------------------------------------------------------------------------------------------------------------------------------------------------------------------|--------------------------------------------------------------------------------------------------------------------------------------------------------------------------------------------------------------------------------------------------------------------------------------------------------------------------------------------------------------------------------------------------------------------------------------------------------------------------------------------------------------------------------------------------------------------------------------|
|                    |                     |                                                                                                                                                                                                                        | reference to Kolb's stages of experiential learning | understanding, experience and interpretation of experiential learning. | encapsulating both classroom and clinical experience. The importance of the experience itself appeared fundamental.<br>b. Role play is identified as the main example of experiential teaching and learning.<br>c. Students were aware of the issues arising from the problematic relationship between theory and practice.<br>d. The importance of reflection as a stage in experiential learning and of reflective practice was highlighted indicating diversity in application.<br>e. Concerns regarding clinical practice.<br>f. The importance of clinical supervision viewing it as experiential learning. | <ul style="list-style-type: none"> <li>- learning with peers.</li> <li>- evaluating nursing models</li> <li>- reflecting.</li> <li>- sharing experiences.</li> <li>- selecting from previous experience to contribute to new ones</li> <li>- practicing of skills</li> <li>- practicing with people.</li> <li>- patient care</li> <li>- non-threatening supportive collaboration with a colleague</li> <li>- learning form practice and reflection</li> <li>- involving clients</li> <li>- reflecting in the form of a portfolio</li> <li>- maintaining personal journals</li> </ul> |
| <b>Kear (2009)</b> | Clinical experience | transformative learning<br><i>The process of critically reflecting upon previous assumptions or understandings in order to determine whether one still holds them to be true or challenges their claims (Mezirow).</i> | Transformative learning                             | Students' stories about how they experienced their learning            | Upon analysis of the narrative data, five threads emerged from the interviews with the participants.<br>1) Stories of the multi-faceted process of learning<br>2) Stories of experiential learning<br>3) Stories of human interactions as central to defining nursing and caring<br>4) Stories that intertwine personal life experiences and nursing<br>5) Stories of transformative learning                                                                                                                                                                                                                    | <ul style="list-style-type: none"> <li>- creating a connection between clinical experience and classroom material</li> <li>- utilizing peers</li> <li>- learning how to do things</li> <li>- meeting patients with their own stories</li> <li>- looking things up in one's books</li> <li>- providing end-of-life care</li> <li>- caring for a paediatric cancer patient and seeing graduate nurses let her do it in her own way</li> <li>- learning to understand the needs of patients that are unable to communicate</li> <li>- observing other nurses to</li> </ul>              |

|                               |                                                                                                                                                          |                                                                                                                                                                        |                                          |                                                                                      |                                                                                                                                                                                                                                                                                                                                                                                                                                                                             |                                                                                                                                                                                                                                                                                                                                                                                                                                                                                                                          |
|-------------------------------|----------------------------------------------------------------------------------------------------------------------------------------------------------|------------------------------------------------------------------------------------------------------------------------------------------------------------------------|------------------------------------------|--------------------------------------------------------------------------------------|-----------------------------------------------------------------------------------------------------------------------------------------------------------------------------------------------------------------------------------------------------------------------------------------------------------------------------------------------------------------------------------------------------------------------------------------------------------------------------|--------------------------------------------------------------------------------------------------------------------------------------------------------------------------------------------------------------------------------------------------------------------------------------------------------------------------------------------------------------------------------------------------------------------------------------------------------------------------------------------------------------------------|
|                               |                                                                                                                                                          |                                                                                                                                                                        |                                          |                                                                                      |                                                                                                                                                                                                                                                                                                                                                                                                                                                                             | <p>determine what kind of nurse they want to be (both negatively and positively)</p> <ul style="list-style-type: none"> <li>- just spending time with patients</li> <li>- observing patient situations that were unjust or nursing care that was viewed as sub-optimal</li> </ul>                                                                                                                                                                                                                                        |
| <b>Kear (2013)</b>            | Clinical experiences                                                                                                                                     | transformative learning<br><i>Changes in meaning perspectives that have developed over an individual's lifetime based upon their life experiences (Mezirow, 2000).</i> | Transformative learning                  | Students' stories about how they experienced their learning                          | <p>Upon analysis of the narrative data, five threads emerged from the interviews with the participants.</p> <ol style="list-style-type: none"> <li>1) Stories of the multi-faceted process of learning</li> <li>2) Stories of experiential learning</li> <li>3) Stories of human interactions as central to defining nursing and caring</li> <li>4) Stories that intertwine personal life experiences and nursing</li> <li>5) Stories of transformative learning</li> </ol> | <ul style="list-style-type: none"> <li>- creating a connection between clinical experiences and classroom material</li> <li>- Interacting with others in the clinical environment</li> <li>- understanding patients' needs by interacting with them</li> <li>- observing nurses to determine what kind of nurse they want to be providing end-of-life care</li> </ul>                                                                                                                                                    |
| <b>Manninen et al. (2013)</b> | learning process in clinical practice; learning through participation and dialogue; learning in clinical practice; learning at a clinical education ward | Experiences of learning at a clinical ward                                                                                                                             | Authenticity and transformative learning | semi-structured interviews of how students experienced their encounters with others. | <p>Two main themes:</p> <ol style="list-style-type: none"> <li>a. mutual relationship</li> <li>b. belongingness</li> </ol>                                                                                                                                                                                                                                                                                                                                                  | <ul style="list-style-type: none"> <li>- creating a relationship with patients by meeting them independently</li> <li>- listening and communicating with the patient/ adjust communication to the individual patient's capacity and needs</li> <li>- involving the patient in the nursing process by identifying the patient's own resources</li> <li>- Learning from making failures</li> <li>- handling difficult situations and feelings</li> <li>- collaborating with physicians, physiotherapists, other</li> </ul> |



1  
2  
3  
4  
5  
6  
7  
8  
9  
10  
11  
12  
13  
14  
15  
16  
17  
18  
19  
20  
21  
22  
23  
24  
25  
26  
27  
28  
29  
30  
31  
32  
33  
34  
35  
36  
37  
38  
39  
40  
41  
42  
43  
44  
45  
46

|                                  |                               |                                                                                                                                                                              |                                                                    |                                                                                                                                                                                                                                        |                                                                                                                                                                                                                                                                                                                                                                                                                                                                                                                                                           |                                                                                                                                                                                                                                                                                                                                                                                       |
|----------------------------------|-------------------------------|------------------------------------------------------------------------------------------------------------------------------------------------------------------------------|--------------------------------------------------------------------|----------------------------------------------------------------------------------------------------------------------------------------------------------------------------------------------------------------------------------------|-----------------------------------------------------------------------------------------------------------------------------------------------------------------------------------------------------------------------------------------------------------------------------------------------------------------------------------------------------------------------------------------------------------------------------------------------------------------------------------------------------------------------------------------------------------|---------------------------------------------------------------------------------------------------------------------------------------------------------------------------------------------------------------------------------------------------------------------------------------------------------------------------------------------------------------------------------------|
|                                  |                               |                                                                                                                                                                              |                                                                    |                                                                                                                                                                                                                                        |                                                                                                                                                                                                                                                                                                                                                                                                                                                                                                                                                           | <ul style="list-style-type: none"> <li>professionals and other students working together with other students, discussing patient care, sharing experiences giving support, informing and showing</li> </ul>                                                                                                                                                                           |
| <b>Manninen (2016)</b>           | Learning in clinical practice | Nursing students' learning in relation to encounters with patients, supervisors, peer students and other healthcare professionals.                                           | transformative learning and concepts of authenticity and threshold | Semi-structured interviews and group interviews of students' experience of their learning with a focus on their encounters with others. Observations with follow up interviews about student-patient encounters and about supervision. | The results show that the core of student meaningful learning is the experience of both external and internal authenticity. External authenticity refers to being in a real clinical setting meeting real patients. Internal authenticity is about the feeling of belonging and really contributing to patients' health and well-being.                                                                                                                                                                                                                   | <ul style="list-style-type: none"> <li>creating mutual relationships</li> <li>taking care of patients with extensive needs for nursing interventions.</li> </ul>                                                                                                                                                                                                                      |
| <b>Mayson and Hayward (1997)</b> | Clinical practice experiences | Learning from hidden curriculum <i>Hidden curriculum involves the experience and application of theory and the wider social context relates to the practice development.</i> | hidden curriculum                                                  | semi-structured interviews about clinical areas and persons that have been beneficial for students' learning, as well as descriptions of their learning.                                                                               | <i>Given a lack of a summary of important themes, I extracted these findings myself</i><br><ol style="list-style-type: none"> <li>1. caring relationship is central for nursing; relationships with patients are significant experiences</li> <li>2. Registered nurses and tutors are contributors to students' learning if they include students</li> <li>3. students actively seek positive experiences</li> <li>4. Peers play a significant role in learning</li> <li>5. importance of being part of the ward team, facilitated by the ward</li> </ol> | <ul style="list-style-type: none"> <li>Working in the medical/surgical areas.</li> <li>Talking with/ listening to clients</li> <li>helping/ making a difference for the patient</li> <li>looking at positive role models</li> <li>sitting together with peers/talking to peers about experiences.</li> <li>watching supervisors on nursing skills and communication skills</li> </ul> |

|                              |                                                 |                                                                                                                                                                      |                                                                                                                                   |                                                                                                                                       |                                                                                                                                                                                                                       |                                                                                                                                                                                                                                                                                                                                                                                                                                                                                                                                                                                            |
|------------------------------|-------------------------------------------------|----------------------------------------------------------------------------------------------------------------------------------------------------------------------|-----------------------------------------------------------------------------------------------------------------------------------|---------------------------------------------------------------------------------------------------------------------------------------|-----------------------------------------------------------------------------------------------------------------------------------------------------------------------------------------------------------------------|--------------------------------------------------------------------------------------------------------------------------------------------------------------------------------------------------------------------------------------------------------------------------------------------------------------------------------------------------------------------------------------------------------------------------------------------------------------------------------------------------------------------------------------------------------------------------------------------|
|                              |                                                 |                                                                                                                                                                      |                                                                                                                                   |                                                                                                                                       | nurse<br>6. theory-practice gap                                                                                                                                                                                       |                                                                                                                                                                                                                                                                                                                                                                                                                                                                                                                                                                                            |
| <b>Roberts (2008)</b>        | Clinical learning; informal on-the job learning | Peer learning<br><i>Peer learning involves students learning from each other</i>                                                                                     | No theoretical framework, used, reference to Eraut's theory on informal learning and Melia's theory of professional socialization | observation of students in clinical practice with a focus on peer interactions                                                        | Themes:<br>a. value placed on friendships and learning in clinical practice.<br>B. students learning survival skills (implicit and explicit rules)<br>c. developing clinical skills                                   | <ul style="list-style-type: none"> <li>- working alongside other students.</li> <li>- passing along implicit rules</li> <li>- making mistakes/ being pulled up/called about them</li> <li>- sharing clinical skills</li> <li>- asking other students for help.</li> <li>- teaching other students, regardless of year of study.</li> </ul>                                                                                                                                                                                                                                                 |
| <b>Seylani et al. (2012)</b> | Clinical experiences                            | Informal learning<br><i>Informal or indirect learning can occur as a function of observing, retaining, and replicating behaviours during educational experiences</i> | -                                                                                                                                 | semi-structured interviews about what changes students experienced during their study apart from theoretical and practical knowledge. | Five categories of students' experiences:<br>a. personal maturity and emotional growth,<br>b. social development<br>c. closeness to God<br>d. alterations in value systems<br>e. ethical and professional commitments | <ul style="list-style-type: none"> <li>- Frequent personal interactions</li> <li>- developing relationships</li> <li>- frequent exposure to life and death situations</li> <li>- interacting with others.</li> <li>- caring for people with different religious beliefs</li> <li>- learning from patients struggling with chronic illness</li> <li>- continuously engaging with people who need help</li> <li>- seeing patients suffer</li> <li>- communicating with patients</li> <li>- caring for the most vulnerable</li> <li>- confronting the light and dark sides of life</li> </ul> |
| <b>Stockhausen (2005)</b>    | learning in the workplace                       | learning in the workplace                                                                                                                                            | No theoretical framework, used, reference to Kolb's stages of experiential learning                                               | Students' journals and reflective group debriefings comprehending reflections on clinical experiences.                                | Themes<br>a. Entering the world of the patient<br>b. Clinicians making a difference<br>c. Constructing an identity as a nurse                                                                                         | <ul style="list-style-type: none"> <li>- learn through the patient's experience</li> <li>- reacting to and deciphering emotive non-verbal cues from the patient as they care for them.</li> <li>- interacting with the patient</li> <li>- reflectively interpreting experiences with the patient.</li> </ul>                                                                                                                                                                                                                                                                               |

1  
2  
3  
4  
5  
6  
7  
8  
9  
10  
11  
12  
13  
14  
15  
16  
17  
18  
19  
20  
21  
22  
23  
24  
25  
26  
27  
28  
29  
30  
31  
32  
33  
34  
35  
36  
37  
38  
39  
40  
41  
42  
43  
44  
45  
46

For peer review only

|                       |                                                         |                              |  |                                                                                    |                                                                                                                                                 |                                                                                                                                                                                                                                                                                                                                                                                                                                                                                                                                                                                                                                                                                                                                     |
|-----------------------|---------------------------------------------------------|------------------------------|--|------------------------------------------------------------------------------------|-------------------------------------------------------------------------------------------------------------------------------------------------|-------------------------------------------------------------------------------------------------------------------------------------------------------------------------------------------------------------------------------------------------------------------------------------------------------------------------------------------------------------------------------------------------------------------------------------------------------------------------------------------------------------------------------------------------------------------------------------------------------------------------------------------------------------------------------------------------------------------------------------|
|                       |                                                         |                              |  |                                                                                    |                                                                                                                                                 | <ul style="list-style-type: none"> <li>- sharing and developing everyday nursing practices with the RN</li> <li>- constructing their own schemata of admirable qualities the RN displays</li> <li>- picking up little tips from the RN/ little things that she does.</li> <li>- listening to RNs</li> <li>- confirming their nursing practices and assimilating theoretical and clinical knowledge</li> <li>- practicing skills</li> <li>- doing what it is that nurses do</li> <li>- activities such as making a bed or showering a patient when considered from a student's achievement perspective.</li> <li>- Engaging with the activities of nursing</li> <li>- Making comparisons and discriminations of practices</li> </ul> |
| <b>Windsor (1987)</b> | Learning in the contextual setting of clinical practice | clinical learning experience |  | Focused interviews about how nursing students perceive their clinical experiences. | Main categories of learning: nursing skills, time management, professional socialization. A pattern of student development through three phases | <ul style="list-style-type: none"> <li>- practicing nursing skills</li> <li>- going back to books and journals</li> <li>- poring over chart for hours</li> <li>- consulting other health care providers</li> <li>- writing papers</li> <li>- observing nurses and participating in nursing functions</li> <li>- preparing for clinical practice including meeting patients, reading charts, studying patients' health needs, consulting staff.</li> <li>- Caring for lots of different patients with different diseases, different kinds of wards, variety of instructors, working with different equipment.</li> </ul>                                                                                                             |

1  
2  
3  
4  
5  
6  
7  
8  
9  
10  
11  
12  
13  
14  
15  
16  
17  
18  
19  
20  
21  
22  
23  
24  
25  
26  
27  
28  
29  
30  
31  
32  
33  
34  
35  
36  
37  
38  
39  
40  
41  
42  
43  
44  
45  
46

|  |  |  |  |  |  |                                                                                                                                                                                                            |
|--|--|--|--|--|--|------------------------------------------------------------------------------------------------------------------------------------------------------------------------------------------------------------|
|  |  |  |  |  |  | <ul style="list-style-type: none"> <li>- Working more subsequent shifts with the same patient</li> <li>- asking question without feeling embarrassed</li> <li>- asking questions to their peers</li> </ul> |
|--|--|--|--|--|--|------------------------------------------------------------------------------------------------------------------------------------------------------------------------------------------------------------|

Table 2. Main concepts, operationalisations, frameworks, findings, learning activities of the included studies

For peer review only

## Concepts

To analyse how learning in practice was approached we compared the main concepts of study, usually reflected in the aims of the paper. Five of the papers studied a concept that was a synonym for learning in clinical practice such as learning experience or workplace learning<sup>15 25 26 29 30</sup>. However, in none of these studies the concept was defined or justified. The remaining eleven studies examined a specific concept related to learning in general, which was studied within the context of clinical practice. In four of the studies this concept concerned social learning, either in general, or from specific groups that are naturally present in the nursing ward<sup>14 22 24 28</sup>. In five of the studies, the non-conscious, unplanned nature of learning was explicitly targeted by the concepts of experiential, informal, and hidden curriculum learning<sup>18-21 27</sup>. The remaining studies focused on the active role of the student in learning by investigating learning styles<sup>23</sup>, or a specific combination of both the process and effects of learning as reflected in the concept of transformative learning<sup>16 17</sup>.

## Theoretical frameworks

The five studies that used a theoretical or conceptual framework to structure the study, used Wenger's community of practice<sup>26</sup> or Mezirow's transformative learning<sup>14-17</sup>. Three of the studies tried to extend on existing theories using a grounded theory approach<sup>18 19 25</sup>. The remaining nine studies discussed their research questions and findings in the light of previous literature relevant for their specific study<sup>20 21 29 30</sup>, some of them referring to theories about learning such as Eraut's theory of informal learning, Melia's theory of professional socialization<sup>28</sup>, or Kolb's learning cycle<sup>18-20 23 29</sup>.

## Operationalisations

Nine studies used interviews, narratives or both to address students experiences of learning in general<sup>16 17 23 25-27</sup> or specifically learning from interactions<sup>14 15 22</sup>. The different approaches shared a semi-structured nature, in which a few main topics were introduced by the researcher, to which students could bring up their ideas and experiences. Some authors<sup>18-20</sup> combined an exploration of what students understood by experiential learning, with an examination of their actual experiences in experiential learning. Finally, in three of the studies, learning was operationalized by the observation of interactions between nursing students and peers or colleagues that play a role in learning<sup>14 24 28</sup>.

## Comparison of conceptualisations

Most of the studies, apart from the ones that focus on social interactions, adopted a very open approach to examine learning in practice, irrespective of the concepts and theoretical frameworks used. This resulted in a variety of overlapping outcomes. Together with the small number of studies, a thorough comparison of the suitability of different concepts can therefore not be made.

### Study results: Learning activities

The thematic analysis allowed us to extract the following classes of activities that are observed or reported to contribute to learning during the daily presence of students in the nursing ward.

- a. Working as a nurse
- b. Interacting with ward staff
- c. Interacting with peers
- d. Interacting with patients
- e. Processing Information

#### *a. Working as a nurse*

Students learn by actively engaging in nursing practice, including gaining responsibility for designing care plans<sup>25</sup>, organizing care, practicing skills and delivering patient care themselves<sup>16 18-20 23 25 26 29</sup>, within a supportive environment<sup>26</sup>. Several studies explicitly report how the importance of working independently evolves throughout training<sup>14 15 25 30</sup>. It should be noted that this theme may overlap with the other themes, and might reflect a more general characteristic of learning in practice.

#### *b. Interacting with ward staff*

Students learn by observing both good and poor examples of registered nurses, listening to them and choosing which one could serve role model<sup>16-19 21 23 26 27 29 30</sup>. Students learn from other professionals on the ward, for example by listening to their discussions during rounds<sup>15 23 30</sup> or receiving feedback<sup>26</sup>. Beside observing nurses, students learn from sharing their work experiences with resident nurses and questioning them<sup>23 25 29 30</sup>.

#### *c. Interacting with peers*

Students learn from peers by working together, questioning each other, sharing experiences, observing each other at work<sup>6 20 23 24 27</sup>, and teaching each other<sup>28</sup>. They pass on implicit rules by asking advice and guidance. Through discussing standards in practice, development plans and practical issues they challenge each other and expand their knowledge<sup>24</sup>. Through dividing the work between them, students optimize their exposure to different learning situations<sup>24</sup>.

#### *d. Interacting with patients*

Listening to patients and building relationships is reported as an activity that students learn from<sup>14-16 20 22 26 27</sup>. More specifically, caring for patients who have different religious beliefs, communication problems, extensive needs, or chronic illnesses or visibly suffer contribute to students' learning<sup>14-16 21</sup>

1  
2  
3 <sup>23 29</sup> as well as providing end-of-life care<sup>16 17 21</sup>. As concrete activities, involving the patient in the  
4 nursing process was regarded to be valuable<sup>15</sup> as well as assisting them with little things<sup>26</sup>, giving  
5 medication, doing post-operative observations, or performing simple tasks such as making a bed, as  
6 long as they can be done independently<sup>26</sup>.  
7  
8  
9

#### 10 11 *e. processing information*

12 A final class of activities refers to how students look up, process, and store information related to  
13 patient care and their learning process. Reflecting on nursing practice promotes learning<sup>18-20 23 29</sup>,  
14 sometimes supported by a journal or a portfolio<sup>20</sup>. More specifically, students reflect by analysing  
15 and comparing nursing practice and thinking how to improve it, making connections with theory and  
16 previous experience<sup>16 17 23 25 29</sup>. Negative experiences such as not being able to answer questions,  
17 witnessing poor practice, making mistakes, and emotion evoking encounters, stimulate students to  
18 reflect and expand their knowledge and skills<sup>15 16 21 26 28</sup>. Students benefit from going through  
19 textbooks<sup>16 25 30</sup> and patient charts<sup>23 30</sup>, as a preparation for the shift for activities such as patient  
20 education.  
21  
22  
23  
24  
25  
26  
27  
28  
29

### 30 **Expert consultation**

31 All four experts acknowledged the synthesized learning activities as the core of clinical training. One  
32 of them added a nuance that some activities automatically promote learning ('learning by doing'),  
33 while others require support by staff (e.g. 'peer learning'). Moreover, one of them noted that  
34 experiences may only result in learning after the learning has been made conscious. Compared to  
35 their ideal vision of practice learning, another expert missed the active role of the student in creating  
36 learning opportunities, as well as formalized elements of learning, such as the formulation of learning  
37 goals and the elaboration of theory learned in school. However, this was something they missed in  
38 their own daily practice as well. Finally, two experts noted that the 'supervisor' role of the resident  
39 nurse was referred to minimally; it appeared that resident nurses were primarily observed as role  
40 models. Two of the experts were surprised by the notion that negative experiences are repeatedly  
41 mentioned as learning opportunities.  
42  
43  
44  
45  
46  
47  
48  
49  
50  
51  
52  
53  
54  
55  
56  
57  
58  
59  
60

## DISCUSSION

This study aimed to provide insight in conceptualisations of 'learning in practice' in the nursing education literature, as well as in their operationalisations and outcomes in terms of learning activities. Five of the 17 reviewed studies adopted a general, yet unexplained, synonym for learning in practice as their object of study, the others approached learning in practice focusing on the social, unplanned, and active nature of learning. These foci are in line with the broader literature on practice learning in healthcare education<sup>331</sup>. Regardless of conceptualisations, all studies adopted a qualitative approach, resulting in various, yet overlapping themes. A closer examination of learning activities that were reported throughout the results, revealed six classes of activities.

Our eventual aim was to make suggestions about the use of terminology in future research. The small number and poor to medium quality of the studies hindered a thorough comparison between concepts. There were often missing links in the alignment between concepts, study aims, operationalization and conclusions, resulting in a variety of results that were often difficult to relate to their original study question. Moreover, the sparse use of theoretical frameworks hindered an aggregation of findings<sup>32</sup>. Therefore, a recommendation is to explain and justify the concepts of study based on previous literature, and critically evaluate findings in the light of these specific terms. Alternatively, a further exploration of the meaning of a concept itself can advance the field. However, caution has to be taken in exploring the meaning of a concept and simultaneously studying participant's experiences with the same concept, as some of the studies did<sup>18-20</sup>.

Not surprisingly, the informal or hidden nature of clinical learning was frequently referred to. As this learning occurs partly unconsciously, it is a challenging subject to define and to study<sup>33</sup>. In the current studies, informal learning was addressed by what it is *not* (i.e. theoretical and practical knowledge)<sup>21</sup>, and hidden curriculum was described by learning resources that were *not* reported by participants<sup>34</sup>. Formal or formalized activities in the clinical area (such as peer teaching and doing 'clinical homework'), were not labelled as such. As both formal and informal learning coexist in the practice setting<sup>35</sup> and the dichotomy between the two has been questioned<sup>36</sup>, clear definitions of these concepts are required, with which the different activities that student engage in throughout the day can be classified.

In most of the studies, potential or desirable learning outcomes were not articulated, and were not separated from outcomes such as professional identity formation or wellbeing. Studies that did include the intended effect of learning in their definitions, as those of Kear<sup>16 17</sup>, did not critically revisit if these outcomes were indeed reported. Obviously, examinations of the relationship between learning and subsequent outcomes can be found in literature addressing particular outcomes (such



1  
2  
3 as skills learning)<sup>37</sup> or about assessment<sup>38</sup>, which we excluded. Moreover, the lack of predefined  
4 outcomes might be a characteristic of clinical learning<sup>39</sup>. However, also in literature addressing  
5 complex learning processes such a clinical learning, a critical discussion of actual and desirable  
6 outcomes, is warranted.  
7  
8  
9

10 The analysis of learning activities is congruent with literature on the importance of increasing  
11 independence<sup>40</sup>, interaction with others<sup>41</sup>, learning from authentic situations with patients<sup>42</sup>, and  
12 reflection<sup>43</sup> as well as with experiences from our expert panel. In the reviewed studies, the  
13 interactions between concrete behaviours and cognitive processing were not systematically  
14 addressed, which resulted in separate categories in our analysis. According to constructivist learning  
15 theories and as was commented by our experts, the social, behavioural and cognitive domains of  
16 learning go hand in hand<sup>44</sup>. Some of the study results did reveal this interaction, such as students  
17 reflecting on how they turned negative experiences into learning. Systematically acknowledging  
18 interactions between behaviour and cognition, in the terminology as well as in the methods, will  
19 contribute to our understanding of how and when individual students learn. Caution has to be taken  
20 though in labels such as 'learning styles' as one of the studies<sup>23</sup> did, in the absence of an accurate test  
21 of the premise of this interpretation. Finally, the appreciation of the learning potential of more  
22 negative experiences, calls for a shift in focus from factors influencing the clinical learning  
23 environment, to students' active role in clinical learning.  
24  
25  
26  
27  
28  
29  
30  
31  
32  
33  
34

### 35 Limitations

36 The variety of concepts, processes, definitions and outcomes associated with learning in clinical  
37 practice proved challenging in determining the boundaries of our search. The selection was  
38 influenced by choice of terminology and framing of the authors of the studies. This review therefore  
39 provides insight into the current use of terminology as well as caveats in applying it. Limiting to  
40 nursing in the hospital setting excluded us from both theoretical and experimental research on  
41 practice learning in other health professions. However, this focus enabled us to synthesize specific  
42 findings from the different studies. The approach can be of interest for other health professions, and  
43 will eventually allow for comparison of the literature. Finally, our synthesis of learning activities is  
44 based on studies with heterogeneity in populations, setting, and year of publication, in which the  
45 same type of activity might have a different meaning. As we reinterpreted some of the data caution  
46 has to be taken in drawing firm conclusions<sup>45</sup>. Nevertheless, as the findings were recognized by  
47 experts and correspond with existing literature, the categories found are a good starting point for  
48 further study.  
49  
50  
51  
52  
53  
54  
55  
56  
57  
58  
59  
60

## Conclusion

This review provides an overview of how learning in clinical practice has been addressed in the undergraduate nursing education literature. The number of studies that investigate examine how students learn during their days at the ward remains scarce and the quality of studies conducted is circumspect. Moreover, these studies often fail to align theoretical concepts with a corresponding operationalization and analysis of findings, therefore offering little guidance for which terminology to use in future studies. The studies on this topic reveal the importance of increased autonomy, learning form, peers, professionals and patients, and the cognitive appraisal of learning. This categorization may be a basis for the design and evaluation of clinical learning. There is still uncertainty about formal and informal components of learning and how they should be studied, as well as about desirable outcomes of clinical learning and how to incorporate them in research. Given the importance of students' active engagement with learning as well as reflection on it, behavioural and cognitive aspects of learning as well as their interactions should be explicitly addressed.

## REFERENCES

1. Cope P, Cuthbertson P, Stoddart B. Situated learning in the practice placement. *J Adv Nurs* 2000;31(4):850-56.
2. Flott EA, Linden L. The clinical learning environment in nursing education: a concept analysis. *J Adv Nurs* 2016;72(3):501-13. doi: 10.1111/jan.12861
3. Manley K, Titchen A, Hardy S. Work-based learning in the context of contemporary health care education and practice: A concept analysis. *Pract Dev Health Care* 2009;8(2):87-127. doi: 10.1002/pdh.284
4. Bisholt B, Ohlsson U, Engstrom AK, et al. Nursing students' assessment of the learning environment in different clinical settings. *Nurse education in practice* 2014;14(3):304-10. doi: 10.1016/j.nepr.2013.11.005 [published Online First: 2013/12/21]
5. Davis K, Drey N, Gould D. What are scoping studies? A review of the nursing literature. *Int J Nurs Stud* 2009;46(10):1386-400. doi: 10.1016/j.ijnurstu.2009.02.010
6. Daudt HM, van Mossel C, Scott SJ. Enhancing the scoping study methodology: a large, inter-professional team's experience with Arksey and O'Malley's framework. *BMC Med Res Methodol* 2013;13(1):48.
7. Arksey H, O'Malley L. Scoping studies: towards a methodological framework. *International Journal of Social Research Methodology* 2005;8(1):19-32. doi: 10.1080/1364557032000119616
8. Levac D, Colquhoun H, O'Brien KK. Scoping studies: advancing the methodology. *Implementation science* 2010;5(1):69.
9. Peters M, Godfrey C, McInerney P, et al. Chapter 11: Scoping Reviews. In: E A, Z M, eds. Joanna Briggs Institute Reviewer's Manual: The Joanna Briggs Institute 2017.
10. Tricco AC, Lillie E, Zarin W, et al. PRISMA extension for scoping reviews (PRISMA-ScR): checklist and explanation. *Ann Intern Med* 2018;169(7):467-73.
11. Buckley S, Coleman J, Davison I, et al. The educational effects of portfolios on undergraduate student learning: a Best Evidence Medical Education (BEME) systematic review. BEME Guide No. 11. *Med Teach* 2009;31(4):282-98.
12. McGowan J, Sampson M, Salzwedel DM, et al. PRESS Peer Review of Electronic Search Strategies: 2015 Guideline Statement. *J Clin Epidemiol* 2016;75:40-6. doi: 10.1016/j.jclinepi.2016.01.021

13. Critical Appraisal Skills Programme. CASP Qualitative Checklist 2018 [Available from: <https://casp-uk.net/casp-tools-checklists/> accessed august 2018.
14. Manninen K. Experiencing authenticity - the core of student learning in clinical practice. *Perspectives on medical education* 2016;5(5):308-11. doi: 10.1007/s40037-016-0294-0 [published Online First: 2016/09/18]
15. Manninen K, Henriksson EW, Scheja M, et al. Authenticity in Learning--Nursing Students' Experiences at a Clinical Education Ward. *Health Education* 2013;113(2):132-43.
16. Kear TM. An investigation of transformative learning experiences during associate degree nursing education using narrative methods. 2009;Ph.D.:141 p-41 p.
17. Kear TM. Transformative learning during nursing education: A model of interconnectivity. *Nurse education today* 2013;33(9):1083-87.
18. Burnard P. Student nurses' perceptions of experiential learning. *Nurse Educ Today* 1992;12(3):163-73. [published Online First: 1992/06/01]
19. Burnard P. Learning from experience: nurse tutors' and student nurses' perceptions of experiential learning in nurse education: some initial findings. *Int J Nurs Stud* 1992;29(2):151-61. [published Online First: 1992/05/01]
20. Green AJ, Holloway DG. Student Nurses' Experience of Experiential Teaching and Learning: Towards a Phenomenological Understanding. 1996;48:69-84.
21. Seylani K, Negarandeh R, Mohammadi E. Iranian undergraduate nursing student perceptions of informal learning: A qualitative research. *Iran J Nurs Midwifery Res* 2012;17(7):493-500.
22. Gidman J. Listening to stories: valuing knowledge from patient experience. *Nurse education in practice* 2013;13(3):192-6. doi: 10.1016/j.nepr.2012.09.006 [published Online First: 2012/10/23]
23. Baraz S, Memarian R, Vanaki Z. The diversity of Iranian nursing students' clinical learning styles: a qualitative study. *Nurse education in practice* 2014;14(5):525-31. doi: 10.1016/j.nepr.2014.03.004 [published Online First: 2014/04/16]
24. Carey MC, Chick A, Kent B, et al. An exploration of peer-assisted learning in undergraduate nursing students in paediatric clinical settings: An ethnographic study. *Nurse Educ Today* 2018;65:212-17. doi: 10.1016/j.nedt.2018.03.014
25. Dadgaran SA, Parvizy S, Peyrovi H. Passing through a rocky way to reach the pick of clinical competency: A grounded theory study on nursing students' clinical learning. *Iranian journal of nursing and midwifery research* 2012;17(5):330-7. [published Online First: 2013/07/16]
26. Grealish L, Ranse K. An exploratory study of first year nursing students' learning in the clinical workplace. *Contemp Nurse* 2009;33(1):80-92.
27. Mayson J, Hayward W. Learning to be a nurse. The contribution of the hidden curriculum in the clinical setting. *Nursing praxis in New Zealand inc* 1997;12(2):16-22. [published Online First: 1997/07/01]
28. Roberts D. Learning in clinical practice: the importance of peers. *Nursing standard (Royal College of Nursing (Great Britain) : 1987)* 2008;23(12):35-41. doi: 10.7748/ns2008.11.23.12.35.c6727 [published Online First: 2008/12/20]
29. Stockhausen LJ. Learning to become a nurse: students' reflections on their clinical experiences. *The Australian journal of advanced nursing : a quarterly publication of the Royal Australian Nursing Federation* 2005;22(3):8-14. [published Online First: 2006/02/28]
30. Windsor A. Nursing students' perceptions of clinical experience. *The Journal of nursing education* 1987;26(4):150-4. [published Online First: 1987/04/01]
31. Yardley S, Teunissen PW, Dornan T. Experiential learning: AMEE Guide No. 63. *Med Teach* 2012;34(2):e102-15. doi: 10.3109/0142159X.2012.650741
32. Prideaux D, Bligh J. Research in medical education: asking the right questions. *Medical education* 2002;36(12):1114-15.
33. Lawrence C, Mhlaba T, Stewart KA, et al. The Hidden Curricula of Medical Education: A Scoping Review. *Acad Med* 2017 doi: 10.1097/ACM.0000000000002004

- 1  
2  
3 34. Mayson J, Hayward W. Learning to be a nurse. The contribution of the hidden curriculum in the  
4 clinical setting. *Nursing praxis in New Zealand inc* 1997;12(2):16-22.
- 5 35. Janssens L, Smet K, Onghena P, et al. The relationship between learning conditions in the  
6 workplace and informal learning outcomes: a study among police inspectors. *Int J Train Dev*  
7 2016
- 8 36. Billett S. Critiquing workplace learning discourses: Participation and continuity at work. *Studies in*  
9 *the Education of Adults* 2002;34(1):56-67.
- 10 37. Coyle-Rogers P, Putman C. Using experiential learning: facilitating hands-on basic patient skills. *J*  
11 *Nurs Educ* 2006;45(4):142-3. [published Online First: 2006/04/25]
- 12 38. Price B. Key principles in assessing students' practice-based learning. *Nurs Stand* 2012;26(49):49-  
13 55; quiz 56. doi: 10.7748/ns2012.08.26.49.49.c9236 [published Online First: 2012/08/31]
- 14 39. Wilkinson TJ. Kolb, integration and the messiness of workplace learning. *Perspectives on Medical*  
15 *Education* 2017:1-2.
- 16 40. Levett-Jones T, Lathlean J, Higgins I, et al. Staff–student relationships and their impact on nursing  
17 students' belongingness and learning. *J Adv Nurs* 2009;65(2):316-24.
- 18 41. Egan T, Jaye C. Communities of clinical practice: the social organization of clinical learning.  
19 *Health: 2009;13(1):107-25.*
- 20 42. Liljedahl M, Boman LE, Falt CP, et al. What students really learn: contrasting medical and nursing  
21 students' experiences of the clinical learning environment. *Adv Health Sci Educ Theory Pract*  
22 2015;20(3):765-79. doi: 10.1007/s10459-014-9564-y
- 23 43. Mann K, Gordon J, MacLeod A. Reflection and reflective practice in health professions education:  
24 a systematic review. *Advances in health sciences education* 2009;14(4):595.
- 25 44. Cleland J, Durning SJ. *Researching Medical Education*: John Wiley & Sons 2015.
- 26 45. Ruggiano N, Perry TE. Conducting secondary analysis of qualitative data: Should we, can we, and  
27 how? *Qualitative Social Work: Research and Practice* 2017:147332501770070. doi:  
28 10.1177/1473325017700701

## FUNDING

This research received no specific grant from any funding agency in the public, commercial or not-for-profit sectors.

## COMPETING INTERESTS

The authors declare that they have no competing interests.

## CONTRIBUTORS

MS, RAK, HED, SP, JCFK contributed to the research idea and study design and edited and revised the paper. MS and JCFK developed the search strategy and executed the search. MS and RAK identified and agreed eligible papers and extracted the data. MS wrote the manuscript. RAK led the supervision of the project.

## PATIENT CONSENT

Not required.

1  
2  
3 **DATA SHARING STATEMENT**  
4

5 The datasets generated during and/or analysed during the current study are available from the  
6 corresponding author on reasonable request.  
7

8  
9 **FIGURES**  
10

11 Figure 1. Flow diagram article screening and selection search step 2  
12  
13  
14  
15  
16  
17  
18  
19  
20  
21  
22  
23  
24  
25  
26  
27  
28  
29  
30  
31  
32  
33  
34  
35  
36  
37  
38  
39  
40  
41  
42  
43  
44  
45  
46  
47  
48  
49  
50  
51  
52  
53  
54  
55  
56  
57  
58  
59  
60

For peer review only

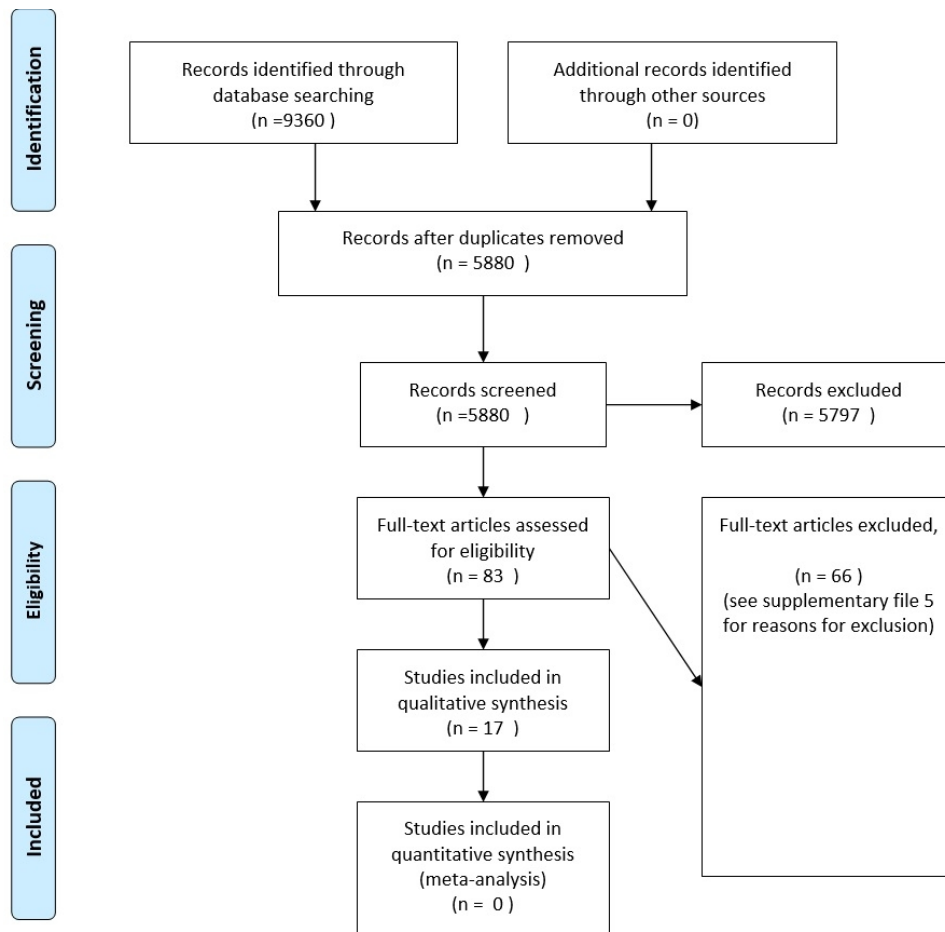

Figure 1. Flow diagram article screening and selection search step 2

245x229mm (96 x 96 DPI)

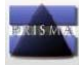

## PRISMA-ScR Checklist

| Section/topic                                        | #  | Checklist item                                                                                                                                                                                                                                                                                                    | Reported on page #       |
|------------------------------------------------------|----|-------------------------------------------------------------------------------------------------------------------------------------------------------------------------------------------------------------------------------------------------------------------------------------------------------------------|--------------------------|
| <b>TITLE</b>                                         |    |                                                                                                                                                                                                                                                                                                                   |                          |
| Title                                                | 1  | Identify the report as a scoping review.                                                                                                                                                                                                                                                                          | 1                        |
| <b>ABSTRACT</b>                                      |    |                                                                                                                                                                                                                                                                                                                   |                          |
| Structured summary                                   | 2  | Provide a structured summary that includes (as applicable) background, objectives, eligibility criteria, sources of evidence, charting methods, results, and conclusions that relate to the review questions and objectives.                                                                                      | 2                        |
| <b>INTRODUCTION</b>                                  |    |                                                                                                                                                                                                                                                                                                                   |                          |
| Rationale                                            | 3  | Describe the rationale for the review in the context of what is already known. Explain why the review questions or objectives lend themselves to a scoping review approach.                                                                                                                                       | 3                        |
| Objectives                                           | 4  | Provide an explicit statement of the questions and objectives being addressed with reference to their key elements (for example, population or participants, concepts, and context) or other relevant key elements used to conceptualize the review questions or objectives.                                      | 3                        |
| <b>METHODS</b>                                       |    |                                                                                                                                                                                                                                                                                                                   |                          |
| Protocol and registration                            | 5  | Indicate whether a review protocol exists; state if and where it can be accessed (for example, a Web address); and if available, provide registration information, including the registration number.                                                                                                             | 4                        |
| Eligibility criteria                                 | 6  | Specify characteristics of the sources of evidence used as eligibility criteria (for example, years considered, language, and publication status), and provide a rationale.                                                                                                                                       | 5                        |
| Information sources                                  | 7  | Describe all information sources in the search (for example, databases with dates of coverage and contact with authors to identify additional sources), as well as the date the most recent search was executed.                                                                                                  | 4 + supplementary file 3 |
| Search                                               | 8  | Present the full electronic search strategy for at least 1 database, including any limits used, such that it could be repeated.                                                                                                                                                                                   | Supplementary file 3     |
| Selection of sources of evidence                     | 9  | State the process for selecting sources of evidence (that is, screening and eligibility) included in the scoping review.                                                                                                                                                                                          | 5                        |
| Data charting process                                | 10 | Describe the methods of charting data from the included sources of evidence (for example, calibrated forms or forms that have been tested by the team before their use, and whether data charting was done independently or in duplicate) and any processes for obtaining and confirming data from investigators. | 6                        |
| Data items                                           | 11 | List and define all variables for which data were sought and any assumptions and simplifications made.                                                                                                                                                                                                            | 6                        |
| Critical Appraisal of Individual Sources of Evidence | 12 | Describe methods used for assessing risk of bias of individual studies (including specification of whether this was done at the study or outcome level), and how this information is to be used in any data synthesis.                                                                                            | 6                        |
| Summary measures                                     | 13 | State the principal summary measures (e.g., risk ratio, difference in means).                                                                                                                                                                                                                                     | N/A                      |
| Synthesis of results                                 | 14 | Describe the methods of handling and summarizing the data that were charted.                                                                                                                                                                                                                                      | 6                        |

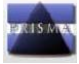

## PRISMA-ScR Checklist

|                             |    |                                                                                                                                                  |     |
|-----------------------------|----|--------------------------------------------------------------------------------------------------------------------------------------------------|-----|
| Risk of bias across studies | 15 | Specify any assessment of risk of bias that may affect the cumulative evidence (e.g., publication bias, selective reporting within studies).     | N/A |
| Additional analyses         | 16 | Describe methods of additional analyses (e.g., sensitivity or subgroup analyses, meta-regression), if done, indicating which were pre-specified. | N/A |

### RESULTS

|                                               |    |                                                                                                                                                                              |       |
|-----------------------------------------------|----|------------------------------------------------------------------------------------------------------------------------------------------------------------------------------|-------|
| Selection of Sources of Evidence              | 17 | Give numbers of sources of evidence screened, assessed for eligibility, and included in the review, with reasons for exclusions at each stage, ideally using a flow diagram. | 7     |
| Characteristics of Sources of Evidence        | 18 | For each source of evidence, present characteristics for which data were charted and provide the citations.                                                                  | 7     |
| Critical Appraisal Within Sources of Evidence | 19 | If done, present data on critical appraisal of included sources of evidence (see item 12).                                                                                   | 7-8   |
| Results of Individual Sources of Evidence     | 20 | For each included source of evidence, present the relevant data that were charted that relate to the review questions and objectives.                                        | 9-18  |
| Synthesis of results                          | 21 | Summarize or present the charting results as they relate to the review questions and objectives.                                                                             | 19-21 |
| Risk of bias across studies                   | 22 | Present results of any assessment of risk of bias across studies (see Item 15).                                                                                              | N/A   |
| Additional analysis                           | 23 | Give results of additional analyses, if done (e.g., sensitivity or subgroup analyses, meta-regression [see Item 16]).                                                        | N/A   |

### DISCUSSION

|                     |    |                                                                                                                                                                                                 |    |
|---------------------|----|-------------------------------------------------------------------------------------------------------------------------------------------------------------------------------------------------|----|
| Summary of evidence | 24 | Summarize the main results (including an overview of concepts, themes, and types of evidence available), link to the review questions and objectives, and consider the relevance to key groups. | 22 |
| Limitations         | 25 | Discuss the limitations of the scoping review process.                                                                                                                                          | 23 |
| Conclusions         | 26 | Provide a general interpretation of the results with respect to the review questions and objectives, as well as potential implications or next steps.                                           | 24 |

### FUNDING

|         |    |                                                                                                                                                                                 |    |
|---------|----|---------------------------------------------------------------------------------------------------------------------------------------------------------------------------------|----|
| Funding | 27 | Describe sources of funding for the included sources of evidence, as well as sources of funding for the scoping review. Describe the role of the funders of the scoping review. | 26 |
|---------|----|---------------------------------------------------------------------------------------------------------------------------------------------------------------------------------|----|

From: Tricco AC, Lillie E, Zarin W, O'Brien KK, Colquhoun H, Levac D, Moher D, Peters MDJ, Horsley T, Weeks L, Hempel S, Akl EA, Chang C, McGowan J, Stewart L, Hartling L, Aldcroft A, Wilson MG, Garritty C, Lewin S, Godfrey CM, Macdonald MT, Langlois EV, Soares-Weiser K, Moriarty J, Clifford T, Tunçalp Ö, Straus SE. PRISMA Extension for Scoping Reviews (PRISMA-ScR): Checklist and Explanation. *Ann Intern Med.* 2018.



## Protocol for a scoping review on the conceptualization of learning in undergraduate clinical nursing practice

Malou Stoffels, MSc<sup>1,2</sup>; Saskia M. Peerdeman, MD, PhD<sup>1,3</sup>; Hester E. Daelmans, MD, PhD<sup>1,4</sup>; Johannes C.F. Ket<sup>5</sup>; Rashmi A. Kusurkar, MD, PhD<sup>1,6</sup>.

### Correspondence

Correspondence should be addressed to Malou Stoffels, VUmc, Department of Research in Education, PO box 7057, 1007 MB Amsterdam, the Netherlands; telephone: +31204446241; e-mail: m.stoffels@vumc.nl;

<sup>1</sup> Department of Research in Education, VUmc School of Medical Sciences, Amsterdam UMC, Amsterdam, the Netherlands

<sup>2</sup>VUmc Amstel Academy, VU University Medical Center, Amsterdam UMC, Amsterdam, the Netherlands

<sup>3</sup>Department of neurosurgery, VU University Medical Center, Amsterdam UMC, Amsterdam, the Netherlands<sup>2</sup>

<sup>4</sup>Department of skills training, VUmc School of Medical Sciences, Amsterdam UMC, Amsterdam, the Netherlands

<sup>5</sup>Medical Library, Vrije Universiteit, Amsterdam, The Netherlands

<sup>6</sup>LEARN! research institute for learning and education, Faculty of Psychology and Education, VU University Amsterdam, the Netherlands.

### Word count

2385

### Key words

Undergraduate nursing education, learning in practice

## ABSTRACT

**Introduction:** Learning in the clinical setting is a major form of learning in undergraduate nursing education. In spite of this, how nursing students learn in clinical practice is still largely unknown. Moreover, there is no conceptual clarity on learning in practice in the current literature. This paper aims to set up a protocol for a scoping review of the literature in order to map different conceptualizations of learning in undergraduate clinical nursing practice in the hospital setting. The operationalisations of different concepts will be compared and the findings of the studies will be synthesized.

**Methods and analysis:** This scoping review will be guided by the methodological framework proposed by Arksey and O'Malley and refined by Levac et al. and the Joanna Briggs institute. The search strategy will be developed together with a medical information specialist and the search will be performed in electronic databases (PubMed, EBSCO/ERIC and EBSCO/CINAHL). In a first search, we will identify concepts that are used as an equivalent to learning in practice. Next we will search for studies operationalizing these concepts in undergraduate nursing education. Finally, we will check reference lists for additional publications. Abstracts and full-text studies will independently be screened by two researchers. All studies that have 'learning in undergraduate clinical nursing practice' as their main topic and that include a definition of operationalization of an equivalent to learning in clinical practice, will be considered for inclusion. We will chart different conceptualisations and their theoretical underpinnings, as well as reported learning opportunities, informal and formal aspects of learning, social aspects of learning and gaps in the literature.

**Ethics and dissemination:** This review will help design future studies on learning in clinical nursing practice using well-defined and agreed upon terminology. The results will be disseminated through journal publications and conference presentations.

## ARTICLE SUMMARY

### Strengths and limitations of this study

- This protocol outlines a rigorous design that includes an established research framework, a search strategy and a selection process.
- The search strategy includes different databases with peer-reviewed literature, with no restrictions to the study design or the publication date.
- The assessment of the quality of the included papers will enable identifying gaps in the literature.

- A limitation is that the literature search will only cover undergraduate nursing education, while a comparison with literature on learning in practice in other health professions would enrich our understanding of potential conceptualizations.
- This study will not include books or grey literature, which will allow us to map how learning in practice is conceptualized in original research.

## INTRODUCTION

Learning in the clinical setting is crucial for becoming a competent nurse<sup>1</sup>. However, how nursing students learn in clinical practice is still largely unknown. A vast body of knowledge exists on factors that influence learning, but the process itself remains underexposed<sup>4</sup>. For example, there is a lack of insight into how individual learning outcomes can be predicted, or which learning opportunities best promote students' learning<sup>5</sup>. Understanding learning in the clinical setting can help design, supervise and evaluate individual learning trajectories and their outcomes in practice. This study aims to set up a protocol for a scoping review to examine how different concepts that are equivalent to 'learning in practice' are used and operationalized in the literature, and what these studies add to our understanding of learning in the clinical setting

In the educational literature, the concept of 'learning in practice' has been widely studied in the context of workplace learning by professionals<sup>6</sup> or practice learning by students<sup>7</sup>. However, there is no unified definition or approach towards this concept<sup>8</sup>. Two main characteristics of clinical learning can be clearly distinguished in the literature. First, learning in practice is often distinguished from learning in the classroom setting as informal opposed to formal learning, where informal learning arises in situations where learning is not the primary aim<sup>9</sup>. However, some authors question the validity of a dichotomy between formal and informal learning<sup>10</sup>, and state that every learning situation contains both formal and informal elements<sup>11</sup>. This would particularly apply to clinical learning, which is characterized by a constant interplay of the 'reality' of clinical practice and formal learning interventions such as feedback and assessment<sup>12</sup>. Another essential characteristic of workplace learning is its social rather than individual nature<sup>13</sup>. That is, learning occurs in interaction and dialogue with others<sup>9</sup>.

In the nursing education literature, just as in other health professions education literature, different terms are used to describe and study learning in clinical practice, with different theoretical underpinnings. Moreover, the rationale behind the application of the concepts used is not always explained. Therefore, it is not always clear whether these different terms refer to the same concept, and how they are defined in terms of learning content (skills, knowledge, values), process (implicit,

1  
2  
3 explicit), control (intended or unintended, guided or not guided) and learning outcomes. Also,  
4 different researchers appear to apply the same concept differently. Having clear and agreed upon  
5 terminology can help design future studies that can contribute to understanding learning in clinical  
6 practice along with its limitations so that nursing wards can be organized for optimal benefit of the  
7 students.  
8  
9

10  
11  
12 The goal of this scoping review is to provide guidance for the use of concepts that describe learning  
13 in undergraduate clinical nursing practice in future studies. This study therefore aims to examine how  
14 different concepts that are equivalent to 'learning in practice' are used and operationalized in the  
15 literature. Therefore, we will look for studies that examine how learning in the clinical setting takes  
16 place. To enable comparison of the use of different concepts, we will focus on the general hospital  
17 setting. This context is the traditional setting for nursing training and comprises a variety of factors  
18 that may be relevant for learning, such as the presence of registered nurses, peers, and other  
19 professionals, as well as complex and acute patients, thereby offering a wide array of  
20 multidimensional learning opportunities<sup>14</sup>. We will particularly consider how formal and informal  
21 aspects of learning, as well as the social component of learning are included in these  
22 operationalisations. We will synthesize the results relating to how students learn in clinical practice.  
23  
24  
25  
26  
27  
28  
29  
30

31 A body of work on concepts to describe learning in practice does exist outside nursing education  
32 literature<sup>15</sup>. To our knowledge, the only study that included distinct concepts of learning in clinical  
33 practice in a review before, was a concept analysis of work-based learning in health care education  
34 by Manley, et al.<sup>16</sup>. The authors identified common attributes, enabling factors and consequences of  
35 workplace learning and proposed a definition. The current review will build on this work by closely  
36 examining different concepts of learning in practice in the context of undergraduate nursing  
37 education, as well as comparing how they are used to study clinical learning. This will enable us to  
38 address gaps in the literature as well as make suggestions for the use of terminology in future studies  
39 Also, the current study will include literature after 2009 when Manley, et al.<sup>16</sup> conducted their study.  
40 In interpreting our findings, we will consider the broader body of literature on learning in practice.  
41  
42  
43  
44  
45  
46  
47  
48

## 49 **METHODS AND ANALYSIS**

50  
51  
52 We decided to use the scoping review approach to map the different concepts that are used to study  
53 learning in clinical nursing practice as well as the way they are operationalised and the information  
54 they provide about how students learn in the clinical setting. Since the lack of a focused line of  
55 inquiry requires a broad research question, we consider a scoping review to be more appropriate  
56 than a systematic review. Scoping can help understand complex concepts through clarifying  
57  
58  
59  
60

1  
2  
3 definitions and conceptual boundaries<sup>17</sup>. Scoping will also enable us to identify key concepts, gaps in  
4 the literature, and types and sources of evidence to inform practice, policymaking, and research<sup>18</sup>. To  
5 get a comprehensive picture of the existing research, we will include studies with different designs.  
6 Since scoping reviews are hypothesis-generating rather than hypothesis-testing, this review can  
7 provide a stepping off point for further research.  
8  
9

10  
11  
12 Standardized reporting guidelines can help the critical appraisal of reviews and thereby increase their  
13 reproducibility, completeness, and transparency<sup>19</sup>. For systematic reviews, the PRISMA-P checklist  
14 has been developed to facilitate the preparation of a robust research protocol<sup>20</sup>. PRISMA guidelines  
15 for scoping reviews are still under development<sup>21</sup>. We therefore used relevant items of the PRISMA-P  
16 (Preferred Reporting Items for Systematic Reviews and Meta-analysis Protocols) to draft this  
17 protocol, as outlined in additional file 1.  
18  
19  
20  
21

22  
23 To ensure rigor in reporting the methodology, we will use the six-stage approach developed by  
24 Arksey and O'Malley<sup>22</sup> and refined by Levac, et al.<sup>23</sup> and the Joanna Briggs institute<sup>24</sup> (1) identifying  
25 the research question; (2) identifying relevant studies; (3) selecting studies; (4) charting the data; (5)  
26 collating, summarizing and reporting the results; (6) expert consultation (optional and included).  
27  
28  
29  
30

### 31 32 *Stage 1. Identifying the research question*

33  
34 Since our aim is to understand how learning in undergraduate clinical nursing practice is  
35 conceptualized in the current literature irrespective of research design and outcome, our research  
36 question is:  
37  
38  
39

- 40 • How are different concepts that are used as an equivalent to learning in the hospital setting  
41 operationalized in the undergraduate nursing education literature?  
42  
43  
44

45 As scoping is an iterative process<sup>22</sup>, we might add additional questions based on our findings along  
46 the review process. While the eventual goal of this study is to contribute to the understanding of the  
47 process of nursing students' learning in practice, we will also synthesize results that are relevant to  
48 this topic.  
49  
50

### 51 52 *Stage 2. Identify relevant studies*

53  
54 The search strategy will be iteratively developed by the research team. As suggested by the Joanna  
55 Briggs institute<sup>24</sup>, we will start with a very broad search to inform our subsequent search strategy. A  
56 comprehensive search strategy will be developed (by MS and JCFK) to conduct this stepwise search  
57  
58  
59  
60

1  
2  
3 process following the Peer Review of Electronic Search Strategies (PRESS) 2015 guideline statement  
4  
5<sup>25</sup>.

6  
7 In an initial search (search step 1), we will combine the terms 'learning in clinical practice' and  
8  
9 'undergraduate nursing students'. The search query for both steps will first be developed for  
10  
11 PubMed and later extended to EBSCO/ERIC and EBSCO/CINAHL to identify different concepts in the  
12  
13 literature that are used as an equivalent to 'learning in clinical practice' by nursing students. See our  
14  
15 draft search in the additional file 2 for step 1 of our search. The first 100 search results from each  
16  
17 database will be reviewed by the researchers to assess validity of the search strategy. When  
18  
19 agreement has been reached about the initial search strategy, the first 200 abstracts will be scanned  
20  
21 by the two reviewers (MS and RAK) on concepts potentially eligible for inclusion in the second search  
22  
23 step. Eligible concepts are concepts that describe the process of learning to become a nurse within  
24  
25 the clinical context ('such as 'experiential learning' or 'informal learning'), rather than specific aspects  
26  
27 or (such as 'skill acquisition' or 'peer learning'). In case of full agreement between the two reviewers  
28  
29 on potentially eligible concepts, the first reviewer will screen the rest of the abstracts. In case of  
30  
31 disagreement, the second author will scan another 200 abstracts until full agreement is reached.  
32  
33 After all abstracts have been screened, the two reviewers will discuss all potentially eligible concepts  
34  
35 and select concepts to be included in the second search step.

36  
37 After having selected the different concepts, we will develop a search query (search step 2) in  
38  
39 PubMed and subsequently extend to EBSCO/ERIC and EBSCO/CINAHL combining each of the  
40  
41 identified concepts with 'undergraduate nursing' to find studies operationalizing one of the identified  
42  
43 concepts in the literature on nursing students' learning in the hospital setting.

44  
45 After these two searches, we will check reference lists for additional publications (See figure 1 for a  
46  
47 flow diagram of the search and selection process). We will conduct the two searches in June 2018.

### 48 49 *Stage 3. Study selection*

50  
51 Following the second step of our search strategy, two independent researchers will screen abstracts  
52  
53 and assess the eligibility for full text retrieval. Selected full-text studies will again be compared  
54  
55 between the reviewers with disagreement being resolved through discussion and consensus and  
56  
57 with input from the full research team.

58  
59 The inclusion criteria will be developed in an iterative process in which the reviewers calibrate a  
60  
61 threshold for inclusion and exclusion. The initial inclusion criteria will be:

- Original research or reviews in peer reviewed journals that have learning in undergraduate clinical nursing practice in the hospital setting as one of their main topics, regardless of publication date and type of article.
- Studies that examine how students learn in the clinical hospital setting

Since we are interested in how learning in practice is operationalized in peer-reviewed research, we exclude books, book reviews, commentaries, letters to the editor, PhD theses, and reports. Reasons for exclusion will be documented at the full-text review stage.

#### *Stage 4. Charting the data*

Data will be extracted from full-text journal articles which meet the aforementioned inclusion criteria. A draft analytic frame is developed to document selected studies into an excel spreadsheet, including study characteristics (year, country, methodology, study question, study design, participants, outcomes, study quality), conceptualization of learning in practice (definitions, theoretical underpinnings/rationale, operationalisations, formal/informal aspects of learning, social interactions, learning opportunities) and reported gaps in the literature. Other categories that come during the data extraction progress will be discussed in the research team and added to the data extraction form. Although formal assessment of study quality is generally not performed in scoping reviews<sup>24</sup>, some claim it should be incorporated in the methodology<sup>18</sup>. Assessing study quality will enable us to address not only quantitative, but also qualitative gaps in the literature<sup>23</sup>. We will therefore assess the quality of included studies by a set of quality indicators for reviews developed by Buckley, et al.<sup>26</sup>. The form will be piloted on 5–10 articles by the team and will allow us to analyse the selected articles through a common framework.

We will document studies that are not selected for full text retrieval in a separate file. To ensure accurate data collection, each reviewer's independent charted data will be compared and any discrepancies will be iteratively discussed by the researchers to ensure consistency between the reviewers.

#### *Stage 5. Collating, summarizing and reporting results*

A PRISMA flow diagram will be used to report final numbers in the resulting study publication. As we expect a diverse body of knowledge, we will give a descriptive account of concepts and subsequent operationalizations. We will synthesise study findings using narrative descriptions based on themes that emerge from the extracted data. The results will be compared and consolidated through consensus between two of the r MS and RAK.

1  
2  
3 We will address both quantitative and qualitative gaps in the literature. We will discuss the data in  
4 the light of relevant theories on workplace learning both in and outside nursing education literature  
5 and make suggestions for the operationalization of learning in practice for future studies.  
6  
7

#### 8 9 *Stage 6. Expert consultation*

10  
11 In order to confirm our findings and interpretations, two nurse educators, with experience in  
12 scientific research and expertise on learning in clinical practice, will be approached for consultation.  
13  
14

### 15 16 **ETHICS AND DISSEMINATION**

17  
18 This scoping review will be the first study to compare terminology used for learning in undergraduate  
19 nursing clinical practice and thereby will contribute to the design and comparison of future studies in  
20 this field. This protocol reports a comprehensive, rigorous and transparent methodology. The results  
21 will be disseminated through a peer-reviewed publication and national and international conferences  
22 such as the AMEE (Association of Medical Education in Europe) conference, targeting an audience  
23 involved in undergraduate nursing education. By identifying gaps in the current body of literature,  
24 this study can guide future nursing education research. Both the methodology and the results may be  
25 of interest for researchers and educators in other health professions than nursing, given the widely  
26 spread importance of learning in clinical practice. Since the methodology applied consists of  
27 reviewing and collecting data from publicly available materials, this study does not require an ethical  
28 approval.  
29  
30  
31  
32  
33  
34  
35  
36  
37

### 38 39 **PATIENT AND PUBLIC INVOLVEMENT**

- 40  
41 - *How was the development of the research question and outcome measures informed*  
42 *by patients' priorities, experience, and preferences?* As education is essential for  
43 improving patient care, patients will eventually benefit from the body of knowledge  
44 this study contributes to. However, specific interests of patients have not been  
45 examined.  
46  
47 - *How did you involve patients in the design of this study?* Patients have not been  
48 involved in the study.  
49  
50 - *Were patients involved in the recruitment to and conduct of the study?* No.  
51 *How will the results be disseminated to study participants?* As this concerns a review,  
52 this study has no participants.  
53  
54 - *For randomised controlled trials, was the burden of the intervention assessed by*  
55 *patients themselves?* Not applicable  
56  
57 - *Patient advisers should also be thanked in the contributorship*  
58 *statement/acknowledgements.* Not applicable  
59  
60 - *If patients and or public were not involved please state this.* Not applicable



## REFERENCES

1. Cope P, Cuthbertson P, Stoddart B. Situated learning in the practice placement. *J Adv Nurs* 2000;31(4):850-56.
2. Egan T, Jaye C. Communities of clinical practice: the social organization of clinical learning. *Health*: 2009;13(1):107-25.
3. Henderson A, Cooke M, Creedy DK, et al. Nursing students' perceptions of learning in practice environments: a review. *Nurse Educ Today* 2012;32(3):299-302. doi: 10.1016/j.nedt.2011.03.010 [published Online First: 2011/04/26]
4. Flott EA, Linden L. The clinical learning environment in nursing education: a concept analysis. *J Adv Nurs* 2016;72(3):501-13. doi: 10.1111/jan.12861
5. Ironside PM, McNelis AM, Ebright P. Clinical education in nursing: rethinking learning in practice settings. *Nurs Outlook* 2014;62(3):185-91. doi: 10.1016/j.outlook.2013.12.004
6. Billett S. Learning through work: workplace affordances and individual engagement. *J Workplace Learn* 2001;13(5):209-14. doi: 10.1108/eum0000000005548
7. Guile D, Griffiths T. Learning Through Work Experience. *J Educ Work* 2001;14(1):113-31. doi: 10.1080/13639080020028738
8. Manuti A, Pastore S, Scardigno AF, et al. Formal and informal learning in the workplace: a research review. *Int J Train Dev* 2015;19(1):1-17.
9. Tynjälä P. Perspectives into learning at the workplace. *Educ Res Rev* 2008;3(2):130-54. doi: 10.1016/j.edurev.2007.12.001
10. Billett S. Critiquing workplace learning discourses: Participation and continuity at work. *Studies in the Education of Adults* 2002;34(1):56-67.
11. Janssens L, Smet K, Onghena P, et al. The relationship between learning conditions in the workplace and informal learning outcomes: a study among police inspectors. *Int J Train Dev* 2016
12. Andrews GJ, Brodie DA, Andrews JP, et al. Professional roles and communications in clinical placements: a qualitative study of nursing students' perceptions and some models for practice. *Int J Nurs Stud* 2006;43(7):861-74.
13. Eraut M. Informal learning in the workplace. *Stud Cont Educ* 2004;26(2):247-73. doi: 10.1080/158037042000225245
14. Bisholt B, Ohlsson U, Engstrom AK, et al. Nursing students' assessment of the learning environment in different clinical settings. *Nurse Educ Pract* 2014;14(3):304-10. doi: 10.1016/j.nepr.2013.11.005 [published Online First: 2013/12/21]
15. Billett S. Mimesis: Learning Through Everyday Activities and Interactions at Work. *Hum Resource Dev Rev* 2014;13(4):462-82. doi: 10.1177/1534484314548275
16. Manley K, Titchen A, Hardy S. Work-based learning in the context of contemporary health care education and practice: A concept analysis. *Pract Dev Health Care* 2009;8(2):87-127. doi: 10.1002/pdh.284
17. Davis K, Drey N, Gould D. What are scoping studies? A review of the nursing literature. *Int J Nurs Stud* 2009;46(10):1386-400. doi: 10.1016/j.ijnurstu.2009.02.010
18. Daudt HM, van Mossel C, Scott SJ. Enhancing the scoping study methodology: a large, inter-professional team's experience with Arksey and O'Malley's framework. *BMC Med Res Methodol* 2013;13(1):48.
19. Colquhoun HL, Levac D, O'Brien KK, et al. Scoping reviews: time for clarity in definition, methods, and reporting. *J Clin Epidemiol* 2014;67(12):1291-4. doi: 10.1016/j.jclinepi.2014.03.013
20. Moher D, Shamseer L, Clarke M, et al. Preferred reporting items for systematic review and meta-analysis protocols (PRISMA-P) 2015 statement. *Syst Rev* 2015;4(1):1.

- 1  
2  
3 21. Tricco A, Straus S, Moher D. Preferred reporting items for systematic reviews and meta-analysis:  
4 extension for Scoping Reviews (PRISMA-ScR). *EQUATOR Netw* [http://www.equator-network](http://www.equator-network.org/wp-content/uploads/2009/02/Executive-summary_ScR_Dec-9.pdf)  
5 *org/wp-content/uploads/2009/02/Executive-summary\_ScR\_Dec-9.pdf* (accessed 20 May  
6 2017) 2017  
7  
8 22. Arksey H, O'Malley L. Scoping studies: towards a methodological framework. *International*  
9 *Journal of Social Research Methodology* 2005;8(1):19-32. doi:  
10 10.1080/1364557032000119616  
11 23. Levac D, Colquhoun H, O'Brien KK. Scoping studies: advancing the methodology. *Implementation*  
12 *science* 2010;5(1):69.  
13 24. Peters M, Godfrey C, McInerney P, et al. Chapter 11: Scoping Reviews. In: E A, Z M, eds. Joanna  
14 Briggs Institute Reviewer's Manual: The Joanna Briggs Institute 2017.  
15 25. McGowan J, Sampson M, Salzwedel DM, et al. PRESS Peer Review of Electronic Search Strategies:  
16 2015 Guideline Statement. *J Clin Epidemiol* 2016;75:40-6. doi: 10.1016/j.jclinepi.2016.01.021  
17 26. Buckley S, Coleman J, Davison I, et al. The educational effects of portfolios on undergraduate  
18 student learning: a Best Evidence Medical Education (BEME) systematic review. BEME Guide  
19 No. 11. *Med Teach* 2009;31(4):282-98.  
20  
21  
22  
23

#### 24 **AUTHOR STATEMENT**

25  
26  
27 MS and RAK were responsible for the initial design of this study MS, HED, RAK, SP, JCFK, contributed  
28 to the development of the eligibility and data extraction criteria JCFK, MS, HED, RAK, developed and  
29 executed the search strategy. MS and RAK are responsible for abstract and full-text screening. MS  
30 conceptualized the review approach and led the writing of the manuscript. MS, RAK, HED, SP, JCFK  
31 contributed and approved the final version of this protocol. RAK led the supervision of the  
32 manuscript preparation.  
33  
34  
35  
36

#### 37 **FUNDING**

38  
39  
40 This research received no specific grant from any funding agency in the public, commercial or not-  
41 for-profit sectors.  
42  
43  
44

#### 45 **CONFLICT OF INTERESTS**

46  
47  
48 The authors declare that they have no competing interests.  
49  
50  
51  
52  
53  
54  
55  
56  
57  
58  
59  
60

1  
2  
3  
4  
5  
6  
7  
8  
9  
10  
11  
12  
13  
14  
15  
16  
17  
18  
19  
20  
21  
22  
23  
24  
25  
26  
27  
28  
29  
30  
31  
32  
33  
34  
35  
36  
37  
38  
39  
40  
41  
42  
43  
44  
45  
46

**Supplementary file 3. Draft search strategy step 1 and 2**

**1. Search strategy step 1**

**PubMed (9 May 2018)**

| Search | Query                                                                                                                                                                                                                                                                                                                                                                                           | Items found |
|--------|-------------------------------------------------------------------------------------------------------------------------------------------------------------------------------------------------------------------------------------------------------------------------------------------------------------------------------------------------------------------------------------------------|-------------|
| #1     | "Students, Nursing"[Mesh] OR "Internship, Nonmedical"[Mesh:noexp] OR (nursing[tiab] AND student*[tiab]) OR ((nursing[tiab] OR nurse[tiab] OR nurses[tiab]) AND internship*[tiab])) AND (((("Clinical Competence"[Mesh] OR "Clinical Medicine"[Majr] OR clinical*[ti] OR clinical*[ot] OR practice*[ti] OR practice[ot]) AND ("Learning"[Mesh] OR learning*[tiab])) OR clinical learning*[tiab]) | 3,586       |

**Ebsco/ERIC (9 May 2018)**

| Search | Query                                                                                                                                                                                                                                                                                                                                                                                                                                                                                                                                                                                                                                                                                                                                                                                                                                                                                                                                                                                                                                                                                                                                                                                                                                                                                                                                                                                                                                                                                                                                                                                                                                                                                                                                                                                                                                                                                                                                                          | Items found |
|--------|----------------------------------------------------------------------------------------------------------------------------------------------------------------------------------------------------------------------------------------------------------------------------------------------------------------------------------------------------------------------------------------------------------------------------------------------------------------------------------------------------------------------------------------------------------------------------------------------------------------------------------------------------------------------------------------------------------------------------------------------------------------------------------------------------------------------------------------------------------------------------------------------------------------------------------------------------------------------------------------------------------------------------------------------------------------------------------------------------------------------------------------------------------------------------------------------------------------------------------------------------------------------------------------------------------------------------------------------------------------------------------------------------------------------------------------------------------------------------------------------------------------------------------------------------------------------------------------------------------------------------------------------------------------------------------------------------------------------------------------------------------------------------------------------------------------------------------------------------------------------------------------------------------------------------------------------------------------|-------------|
| S7     | S1 AND S6                                                                                                                                                                                                                                                                                                                                                                                                                                                                                                                                                                                                                                                                                                                                                                                                                                                                                                                                                                                                                                                                                                                                                                                                                                                                                                                                                                                                                                                                                                                                                                                                                                                                                                                                                                                                                                                                                                                                                      | 408         |
| S6     | S4 OR S5                                                                                                                                                                                                                                                                                                                                                                                                                                                                                                                                                                                                                                                                                                                                                                                                                                                                                                                                                                                                                                                                                                                                                                                                                                                                                                                                                                                                                                                                                                                                                                                                                                                                                                                                                                                                                                                                                                                                                       | 70,505      |
| S5     | TI ("clinical learning*") OR AB ("clinical learning*")                                                                                                                                                                                                                                                                                                                                                                                                                                                                                                                                                                                                                                                                                                                                                                                                                                                                                                                                                                                                                                                                                                                                                                                                                                                                                                                                                                                                                                                                                                                                                                                                                                                                                                                                                                                                                                                                                                         | 84          |
| S4     | S2 AND S3                                                                                                                                                                                                                                                                                                                                                                                                                                                                                                                                                                                                                                                                                                                                                                                                                                                                                                                                                                                                                                                                                                                                                                                                                                                                                                                                                                                                                                                                                                                                                                                                                                                                                                                                                                                                                                                                                                                                                      | 70,505      |
| S3     | DE "Learning" OR DE "Active Learning" OR DE "Adult Learning" OR DE "Associative Learning" OR DE "Aural Learning" OR DE "Cooperative Learning" OR DE "Discovery Learning" OR DE "Discrimination Learning" OR DE "Electronic Learning" OR DE "Experiential Learning" OR DE "Incidental Learning" OR DE "Intentional Learning" OR DE "Interference (Learning)" OR DE "Lifelong Learning" OR DE "Mastery Learning" OR DE "Multisensory Learning" OR DE "Nonverbal Learning" OR DE "Observational Learning" OR DE "Prior Learning" OR DE "Problem Based Learning" OR DE "Rote Learning" OR DE "Second Language Learning" OR DE "Sequential Learning" OR DE "Serial Learning" OR DE "Student Centered Learning" OR DE "Symbolic Learning" OR DE "Transfer of Training" OR DE "Transformative Learning" OR DE "Verbal Learning" OR DE "Visual Learning" OR DE "Workplace Learning" OR DE "Active Learning" OR DE "Adult Learning" OR DE "Associative Learning" OR DE "Paired Associate Learning" OR DE "Aural Learning" OR DE "Cooperative Learning" OR DE "Discovery Learning" OR DE "Discrimination Learning" OR DE "Electronic Learning" OR DE "Experiential Learning" OR DE "Field Experience Programs" OR DE "Internship Programs" OR DE "Job Shadowing" OR DE "Service Learning" OR DE "Incidental Learning" OR DE "Intentional Learning" OR DE "Interference (Learning)" OR DE "Lifelong Learning" OR DE "Mastery Learning" OR DE "Multisensory Learning" OR DE "Nonverbal Learning" OR DE "Perceptual Motor Learning" OR DE "Observational Learning" OR DE "Prior Learning" OR DE "Problem Based Learning" OR DE "Rote Learning" OR DE "Second Language Learning" OR DE "Sequential Learning" OR DE "Serial Learning" OR DE "Student Centered Learning" OR DE "Symbolic Learning" OR DE "Transfer of Training" OR DE "Transformative Learning" OR DE "Verbal Learning" OR DE "Visual Learning" OR DE "Workplace Learning" OR TI (learning*) OR AB (learning*) | 381,995     |
| S2     | DE "Clinical Experience" OR TI (clinical* OR practice*) OR AB (clinical* OR practice*)                                                                                                                                                                                                                                                                                                                                                                                                                                                                                                                                                                                                                                                                                                                                                                                                                                                                                                                                                                                                                                                                                                                                                                                                                                                                                                                                                                                                                                                                                                                                                                                                                                                                                                                                                                                                                                                                         | 205,148     |

|           |                                                                                                                                                                                     |              |
|-----------|-------------------------------------------------------------------------------------------------------------------------------------------------------------------------------------|--------------|
| <b>S1</b> | DE "Nursing Students" OR TI ((nursing N3 student*) OR ((nursing OR nurse OR nurses) N3 internship*)) OR AB ((nursing N3 student*) OR ((nursing OR nurse OR nurses) N3 internship*)) | <b>2,294</b> |
|-----------|-------------------------------------------------------------------------------------------------------------------------------------------------------------------------------------|--------------|

## Ebsco/CINAHL (9 May 2018)

| Search     | Query                                                                                                                                                                                                                                                                | Items found    |
|------------|----------------------------------------------------------------------------------------------------------------------------------------------------------------------------------------------------------------------------------------------------------------------|----------------|
| <b>S11</b> | S1 AND S10                                                                                                                                                                                                                                                           | <b>3,209</b>   |
| <b>S10</b> | S5 OR S9                                                                                                                                                                                                                                                             | <b>14,430</b>  |
| <b>S9</b>  | S3 AND S8                                                                                                                                                                                                                                                            | <b>12,924</b>  |
| <b>S8</b>  | MH "Clinical Competence+" OR TI (clinical* OR practice*)                                                                                                                                                                                                             | <b>234,601</b> |
| <b>S7</b>  | S1 AND S6                                                                                                                                                                                                                                                            | <b>5,669</b>   |
| <b>S6</b>  | S4 OR S5                                                                                                                                                                                                                                                             | <b>32,948</b>  |
| <b>S5</b>  | MH "Learning Environment, Clinical" OR TI ("clinical learning*") OR AB ("clinical learning*")                                                                                                                                                                        | <b>2,388</b>   |
| <b>S4</b>  | S2 AND S3                                                                                                                                                                                                                                                            | <b>31,869</b>  |
| <b>S3</b>  | MH "Learning+" OR MH "Conditioning (Psychology)+" OR MH "Memory+" OR MH "Reinforcement (Psychology)+" OR MH "Problem Solving+" OR TI (learning*) OR AB (learning*)                                                                                                   | <b>103,547</b> |
| <b>S2</b>  | MH "Clinical Competence+" OR TI (clinical* OR practice*) OR AB (clinical* OR practice*)                                                                                                                                                                              | <b>631,184</b> |
| <b>S1</b>  | MH "Students, Nursing+" OR MH "Students, Nursing, Baccalaureate+" OR MH "Students, Nursing, Graduate+" OR TI ((nursing N3 student*) OR ((nursing OR nurse OR nurses) N3 internship*)) OR AB ((nursing N3 student*) OR ((nursing OR nurse OR nurses) N3 internship*)) | <b>35,637</b>  |

## 2. Search strategy and numbers of hits step 2

### 2.1 search strategy

**(PubMed:** *(concept\*[tiab] OR (conceptpart1\*[ti] AND conceptpart2\*[ti]) OR (conceptpart1 [ot] AND conceptpart2\*[ot]))* If integral concept could not be found in the Index, this was composed with an AND relation.

[Mesh] = Medical Subject Headings, keywords in PubMed

[tiab] = words in title or abstract

[ti] = words in title

[ot] = other terms, in particular author keywords

MH = mapped heading, keyword in CINAHL

DE = descriptor, keyword in ERIC

1  
2  
3  
4  
5  
6  
7  
8  
9  
10  
11  
12  
13  
14  
15  
16  
17  
18  
19  
20  
21  
22  
23  
24  
25  
26  
27  
28  
29  
30  
31  
32  
33  
34  
35  
36  
37  
38  
39  
40  
41  
42  
43  
44  
45  
46

TI = words in title  
AB = words in abstract

| Search | PubMed                                                                                                                                                                                                             | Ebsco/ERIC                                                                                                                                                                          | Ebsco/CINAHL                                                                                                                                                                                                                                                         |
|--------|--------------------------------------------------------------------------------------------------------------------------------------------------------------------------------------------------------------------|-------------------------------------------------------------------------------------------------------------------------------------------------------------------------------------|----------------------------------------------------------------------------------------------------------------------------------------------------------------------------------------------------------------------------------------------------------------------|
| #1     | "Students, Nursing"[Mesh] OR "Internship, Nonmedical"[Mesh:noexp] OR ((nursing[tiab] OR nurse[tiab] OR nurses[tiab]) AND student*[tiab]) OR ((nursing[tiab] OR nurse[tiab] OR nurses[tiab]) AND internship*[tiab]) | DE "Nursing Students" OR TI ((nursing N3 student*) OR ((nursing OR nurse OR nurses) N3 internship*)) OR AB ((nursing N3 student*) OR ((nursing OR nurse OR nurses) N3 internship*)) | MH "Students, Nursing+" OR MH "Students, Nursing, Baccalaureate+" OR MH "Students, Nursing, Graduate+" OR TI ((nursing N3 student*) OR ((nursing OR nurse OR nurses) N3 internship*)) OR AB ((nursing N3 student*) OR ((nursing OR nurse OR nurses) N3 internship*)) |
| #2     | authentic learning*[tiab] OR (authentic*[ti] AND learning*[ti]) OR (authentic*[ot] AND learning*[ot])                                                                                                              | TI (authentic* AND learning*) OR AB ("authentic learning*")                                                                                                                         | TI (authentic* AND learning*) OR AB ("authentic learning*")                                                                                                                                                                                                          |
| #3     | clinical learning*[tiab]                                                                                                                                                                                           | TI ("clinical learning*") OR AB ("clinical learning*")                                                                                                                              | TI (authentic* AND learning*) OR AB ("authentic learning*")                                                                                                                                                                                                          |
| #4     | clinical placement learning*[tiab] OR (clinical placement*[ti] AND learning*[ti]) OR (clinical placement*[ot] AND learning*[ot])                                                                                   | TI ("clinical placement"* AND learning*) OR AB ("clinical placement learning*")                                                                                                     | TI ("clinical placement"* AND learning*) OR AB ("clinical placement learning*")                                                                                                                                                                                      |
| #5     | (clinically based*[tiab] AND learning*[tiab])                                                                                                                                                                      | TI ("clinically based" AND learning*) OR AB ("clinically based learning*")                                                                                                          | TI ("clinically based" AND learning*) OR AB ("clinically based learning*")                                                                                                                                                                                           |
| #6     | (experiential learning*[tiab] OR (experiential*[ti] AND learning*[ti]) OR (experiential*[ot] AND learning*[ot]))                                                                                                   | DE "experiential learning" OR TI (experiential* AND learning*) OR AB ("experiential learning*")                                                                                     | MH "Experiential learning" OR TI (experiential* AND learning*) OR AB ("experiential learning*")                                                                                                                                                                      |
| #7     | experimental learning*[tiab] OR (experimental*[ti] AND learning*[ti]) OR (experimental*[ot] AND learning*[ot])                                                                                                     | TI (experimental* AND learning*) OR AB ("experimental learning*")                                                                                                                   | TI (experimental* AND learning*) OR AB ("experimental learning*")                                                                                                                                                                                                    |
| #8     | hidden curriculum*[tiab] OR (hidden*[ti] AND curriculum*[ti]) OR (hidden*[ot] AND curriculum*[ot])                                                                                                                 | DE "hidden curriculum" OR TI (hidden* AND curriculum*) OR AB ("hidden curriculum*")                                                                                                 | TI (hidden* AND curriculum*) OR AB ("hidden curriculum*")                                                                                                                                                                                                            |
| #9     | informal learning*[tiab] OR (informal*[ti] AND learning*[ti]) OR (informal*[ot] AND learning*[ot])                                                                                                                 | TI (informal* AND learning*) OR AB ("informal learning*")                                                                                                                           | TI (informal* AND learning*) OR AB ("informal learning*")                                                                                                                                                                                                            |
| #10    | learning by doing*[tiab] OR (learning*[ti] AND doing*[ti]) OR (learning*[ot] AND doing*[ot])                                                                                                                       | TI (learning* AND doing*) OR AB ("learning by doing*")                                                                                                                              | TI (learning* AND doing*) OR AB ("learning by doing*")                                                                                                                                                                                                               |

|     |                                                                                                                      |                                                                                                           |                                                                                                           |
|-----|----------------------------------------------------------------------------------------------------------------------|-----------------------------------------------------------------------------------------------------------|-----------------------------------------------------------------------------------------------------------|
| #11 | "learning from experience*"[tiab]                                                                                    | TI "learning w1 experience*" OR AB "learning w1 experience*"                                              | TI "learning w1 experience*" OR AB "learning w1 experience*"                                              |
| #12 | "learning through experience*"[tiab]                                                                                 | TI ("learning through experience*") OR AB ("learning through experience*")                                | TI ("learning through experience*") OR AB ("learning through experience*")                                |
| #13 | (learning*[tiab] AND clinical placement experience*[tiab])                                                           | TI (learning* AND "clinical placement experience") OR AB ("learning from clinical placement experience*") | TI (learning* AND "clinical placement experience") OR AB ("learning from clinical placement experience*") |
| #14 | practice based learning*[tiab] OR (practice based*[ti] AND learning*[ti]) OR (practice based*[ot] AND learning*[ot]) | TI ("practice based*" AND learning*) OR AB ("practice based learning*")                                   | TI ("practice based*" AND learning*) OR AB ("practice based learning*")                                   |
| #15 | practice learning*[tiab]                                                                                             | TI ("practice learning*") OR AB ("practice learning*")                                                    | TI ("practice learning*") OR AB ("practice learning*")                                                    |
| #16 | learning from practice*[tiab]                                                                                        | TI (learning w1 practice*) OR AB (learning w1 practice*)                                                  | TI (learning w1 practice*) OR AB (learning w1 practice*)                                                  |
| #17 | learning in practice*[tiab]                                                                                          | TI (learning w1 practice*) OR AB (learning w1 practice*)                                                  | TI (learning w1 practice*) OR AB (learning w1 practice*)                                                  |
| #18 | (learning*[tiab] AND clinical practicum*[tiab])                                                                      | TI (learning* AND "clinical practicum*") OR AB (learning w2 clinical practicum*)                          | TI (learning* AND "clinical practicum*") OR AB (learning w2 clinical practicum*)                          |
| #19 | (learning*[tiab] AND clinical field*[tiab])                                                                          | TI (learning* AND "clinical field*") OR AB (learning w2 clinical field*)                                  | TI (learning* AND "clinical field*") OR AB (learning w2 clinical field*)                                  |
| #20 | (learning*[tiab] AND clinical context*[tiab])                                                                        | TI (learning* AND "clinical context*") OR AB (learning w2 clinical context*)                              | TI (learning* AND "clinical context*") OR AB (learning w2 clinical context*)                              |
| #21 | (learning*[tiab] AND clinical setting*[tiab])                                                                        | TI (learning* AND "clinical setting*") OR AB (learning w2 clinical setting*)                              | TI (learning* AND "clinical setting*") OR AB (learning w2 clinical setting*)                              |
| #22 | (learning*[tiab] AND clinical nursing environment*[tiab])                                                            | TI (learning* AND "clinical nursing environment*") OR AB (learning w2 clinical nursing environment*)      | TI (learning* AND "clinical nursing environment*") OR AB (learning w2 clinical nursing environment*)      |
| #23 | (learning*[tiab] AND clinical environment*[tiab])                                                                    | TI (learning* AND "clinical environment*") OR AB (learning w2 clinical environment*)                      | TI (learning* AND "clinical environment*") OR AB (learning w2 clinical environment*)                      |
| #24 | learning on the job*[tiab] OR (learning*[ti] AND on the job*[ti]) OR (learning*[ot] AND on the job*[ot])             | TI (learning* AND "on the job*") OR AB ("learning on the job*")                                           | TI (learning* AND "on the job*") OR AB ("learning on the job*")                                           |
| #25 | workplace learning*[tiab] OR (workplace*[ti] AND learning*[ti]) OR (workplace*[ot] AND learning*[ot])                | DE "workplace learning" OR TI (workplace* AND learning*) OR AB ("workplace learning*")                    | TI (workplace* AND learning*) OR AB ("workplace learning*")                                               |

|     |                                                                                                                                                            |                                                                                      |                                                                                                      |
|-----|------------------------------------------------------------------------------------------------------------------------------------------------------------|--------------------------------------------------------------------------------------|------------------------------------------------------------------------------------------------------|
| #26 | learning in the workplace*[tiab] OR (learning*[ti] AND workplace*[ti]) OR (learning*[ot] AND workplace*[ot])                                               | TI (learning* AND "in the workplace*") OR AB ("learning in the workplace*")          | TI (learning* AND "in the workplace*") OR AB ("learning in the workplace*")                          |
| #27 | work based learning*[tiab] OR (work based*[ti] AND learning*[ti]) OR (work based*[ot] AND learning*[ot])                                                   | TI ("work based*" AND learning*) OR AB ("work based learning*")                      | TI ("work based*" AND learning*) OR AB ("work based learning*")                                      |
| #28 | work integrated learning*[tiab] OR (work integrated*[ti] AND learning*[ti]) OR (work integrated*[ot] AND learning*[ot])                                    | TI ("work integrated*" AND learning*) OR AB ("work integrated learning*")            | TI ("work integrated*" AND learning*) OR AB ("work integrated learning*")                            |
| #29 | learning process*[tiab]                                                                                                                                    | DE "Learning Processes" OR TI ("learning process*") OR AB ("learning process*")      | TI ("learning process*") OR AB ("learning process*")                                                 |
| #30 | "learning the practice of nursing"[tiab]                                                                                                                   | TI ("learning the practice of nursing*") OR AB ("learning the practice of nursing*") | TI ("learning the practice of nursing*") OR AB ("learning the practice of nursing*")                 |
| #31 | (learning*[tiab] AND clinical nursing*[tiab])                                                                                                              | TI (learning* AND "clinical nursing*") OR AB ("learning clinical nursing*")          | TI (learning* AND "clinical nursing*") OR AB ("learning clinical nursing*")                          |
| #32 | placement learning*[tiab] OR (placement*[ti] AND learning*[ti]) OR (placement*[ot] AND learning*[ot])                                                      | TI (placement* AND learning*) OR AB ("placement learning*")                          | TI (placement* AND learning*) OR AB ("placement learning*")                                          |
| #33 | "Self-Directed Learning as Topic"[Mesh] OR self directed learning*[tiab] OR (self directed[ti] AND learning*[ti]) OR (self directed[ot] AND learning*[ot]) | TI ("self directed*" AND learning*) OR AB ("self directed learning*")                | MH "Self directed learning" OR TI ("self directed*" AND learning*) OR AB ("self directed learning*") |
| #34 | self regulated learning*[tiab] OR (self regulated [ti] AND learning*[ti]) OR (self regulated [ot] AND learning*[ot])                                       | TI ("self regulated*" AND learning*) OR AB ("self regulated learning*")              | TI ("self regulated*" AND learning*) OR AB ("self regulated learning*")                              |
| #35 | situated learning*[tiab] OR (situated*[ti] AND learning*[ti]) OR (situated*[ot] AND learning*[ot])                                                         | TI (situated* AND learning*) OR AB ("situated learning*")                            | TI (situated* AND learning*) OR AB ("situated learning*")                                            |
| #36 | socialisation*[tiab]                                                                                                                                       | TI (socialisation*) OR AB ("socialisation*")                                         | TI (socialisation*) OR AB ("socialisation*")                                                         |
| #37 | socialization*[tiab]                                                                                                                                       | TI (socialization*) OR AB ("socialization*")                                         | TI (socialization*) OR AB ("socialization*")                                                         |
| #38 | student learning*[tiab]                                                                                                                                    | TI ("student learning*") OR AB ("student learning*")                                 | TI ("student learning*") OR AB ("student learning*")                                                 |
| #39 | ward based learning*[tiab] OR (ward based*[ti] AND learning*[ti]) OR (ward based*[ot] AND learning*[ot])                                                   | TI ("ward based" AND learning*) OR AB ("ward based learning*")                       | TI ("ward based" AND learning*) OR AB ("ward based learning*")                                       |

|  |                               |  |  |
|--|-------------------------------|--|--|
|  | based*[ot] AND learning*[ot]) |  |  |
|--|-------------------------------|--|--|

During the search and selection process, three concepts appeared in the literature that had been discarded before, but were added to the list of concepts to run the second search with after discussion in the research team. The total number of hits was calculated after this search.

| Concept | PubMed                                                                                                                 | Ebsco/ERIC                                                                  | Ebsco/CINAHL                                                                |
|---------|------------------------------------------------------------------------------------------------------------------------|-----------------------------------------------------------------------------|-----------------------------------------------------------------------------|
| #40     | (peer learning*[tiab]) OR (peer*[ti] AND learning*[ti]) OR (peer*[ot] AND learning*[ot])                               | TI ("peer*" AND learning*) OR AB ("peer learning*")                         | TI ("peer*" AND learning*) OR AB ("peer learning*")                         |
| #41     | Peer assisted*[tiab] OR (peer assisted*[ti] AND learning*[ti]) OR (peer assisted*[ot] AND learning*[ot])               | TI ("peer assisted*" AND learning*) OR AB ("peer assisted based learning*") | TI ("peer assisted*" AND learning*) OR AB ("peer assisted based learning*") |
| #42     | (transformative learning*[tiab] OR (transformative*[ti] AND learning*[ti]) OR (transformative*[ot] AND learning*[ot])) | TI (transformative* AND learning*) OR AB ("transformative learning*")       | TI (transformative* AND learning*) OR AB ("transformative learning*")       |

## 2.2 Number of hits per concept

|     | Concepts                                                                                                                                                                                   | Combination of searches with # from queries in the above table | PubMed (23 May 2018) | Ebsco/-ERIC (23 May 2018) | Ebsco/-CINAHL (23 May 2018) |
|-----|--------------------------------------------------------------------------------------------------------------------------------------------------------------------------------------------|----------------------------------------------------------------|----------------------|---------------------------|-----------------------------|
| 1.  | <b>Authentic learning</b>                                                                                                                                                                  | #1 AND #2                                                      | 32                   | 6                         | 23                          |
| 2.  | <b>Clinical learning/ clinically based learning/ clinical placement learning</b>                                                                                                           | #1 AND (#3 OR #4 OR 5)                                         | 631                  | 16                        | 544                         |
| 3.  | <b>Experiential learning</b>                                                                                                                                                               | #1 AND #6                                                      | 294                  | 84                        | 571                         |
| 4.  | <b>Experimental learning</b>                                                                                                                                                               | #1 AND #7                                                      | 31                   | 2                         | 26                          |
| 5.  | <b>Hidden curriculum</b>                                                                                                                                                                   | #1 AND # 8                                                     | 26                   | 1                         | 18                          |
| 6.  | <b>Informal learning</b>                                                                                                                                                                   | #1 AND #9                                                      | 11                   | 7                         | 7                           |
| 7.  | <b>Learning by doing</b>                                                                                                                                                                   | #1 AND #10                                                     | 12                   | 3                         | 14                          |
| 8.  | <b>Learning clinical nursing/ learning the practice of nursing</b>                                                                                                                         | #1 AND (#30 OR #31)                                            | 205                  | 0                         | 31                          |
| 9.  | <b>Learning from/through experience/learning from clinical placement experience</b>                                                                                                        | #1 AND (#11 OR #12 OR 13)                                      | 48                   | 7                         | 4                           |
| 10. | <b>Learning in the clinical field/learning in the clinical context/ Learning in the clinical setting/Learning in the clinical nursing environment/learning in the clinical environment</b> | #1 AND (#19 OR #20 OR #21 OR #22 OR #23)                       | 785                  | 16                        | 240                         |
| 11. | <b>Learning on the job</b>                                                                                                                                                                 | #1 AND #24                                                     | 0                    | 2                         | 2                           |



|     |                                                                                                                                                                                              |                                          |      |    |     |
|-----|----------------------------------------------------------------------------------------------------------------------------------------------------------------------------------------------|------------------------------------------|------|----|-----|
| 12. | <b>Learning process</b>                                                                                                                                                                      | #1 AND #29                               | 463  | 40 | 474 |
| 13. | <b>Learning in practice/learning from practice/ learning in practice environment/learning in practice setting/learning in a clinical practicum/practice learning/practice based learning</b> | #1 AND (#14 OR #15 OR #16 OR #17 OR #18) | 176  | 10 | 205 |
| 14. | <b>Placement learning</b>                                                                                                                                                                    | #1 AND #32                               | 102  | 4  | 64  |
| 15. | <b>Practice based learning</b>                                                                                                                                                               |                                          |      |    |     |
| 16. | <b>Self directed learning</b>                                                                                                                                                                | #1 AND #33                               | 1210 | 20 | 297 |
| 17. | <b>Self-regulated learning</b>                                                                                                                                                               | #1 AND #34                               | 27   | 2  | 32  |
| 18. | <b>Situated learning</b>                                                                                                                                                                     | #1 AND #35                               | 25   | 4  | 17  |
| 19. | <b>Socialisation/socialisation</b>                                                                                                                                                           | #1 AND (#36 OR #37)                      | 380  | 35 | 372 |
| 20. | <b>Student learning</b>                                                                                                                                                                      | #1 AND #38                               | 543  | 66 | 663 |
| 21. | <b>Ward based learning</b>                                                                                                                                                                   | #1 AND #39                               | 0    | 1  | 2   |
| 22. | <b>Workplace learning/learning in the workplace/work based learning/work integrated learning</b>                                                                                             | #1 AND (#25 OR #26 OR #27 OR #28)        | 92   | 5  | 67  |
| 23. | <b>Peer learning*</b>                                                                                                                                                                        | #1 AND #40                               | 106  | 4  | 31  |
| 24. | <b>Peer assisted learning*</b>                                                                                                                                                               | #1 AND #41                               | 23   | 0  | 3   |
| 25. | <b>Transformative learning*</b>                                                                                                                                                              | #1 AND #42                               | 60   | 17 | 19  |

\* Search 23, 24 and 25 have been conducted on 16 september 2018.

Supplementary file 4. List of potentially eligible concepts and their reason for inclusion/exclusion in the second search step after discussion.

|                                          | Inclusion? | Rationale                                                                                                           |
|------------------------------------------|------------|---------------------------------------------------------------------------------------------------------------------|
| Active learning                          | no         | Used exclusively for learning in the classroom setting                                                              |
| Authentic learning                       | yes        | Is used as an equivalent to learning in clinical practice <sup>1</sup>                                              |
| Blended learning                         | No         | Used exclusively for learning in the classroom setting                                                              |
| case based learning                      | no         | Used exclusively for learning in the classroom setting, simulation learning or online learning                      |
| clinical experience/ practice experience | no         | Used to describe the overall experience of being in a clinical setting rather than the learning process             |
| clinical learning                        | yes        | Used as an equivalent to learning in clinical practice                                                              |
| clinical learning environment            | no         | Used to describe learning circumstances rather than the learning process itself                                     |
| clinical learning model                  | no         | Used to describe learning circumstances rather than the learning process itself                                     |
| Clinical nursing education               | no         | Is used to describe the entire system (organization, supervision, contents etc. ) within which learning takes place |
| clinical placement learning              | yes        | Used as an equivalent to learning in clinical practice                                                              |
| clinical skills learning                 | no         | Used to describe a specific part (ie skills learning) of learning in clinical practice                              |
| clinically based learning                | yes        | Used as an equivalent to learning in clinical practice                                                              |
| Collaborative learning                   | no         | Used to describe a specific way of organizing learning in clinical practice (ie learning in pairs)                  |
| concept-based learning                   | no         | Used either for curriculum design or for specific learning activities in clinical practice                          |
| cooperative learning                     | No         | Used to describing specific learning/ teaching activities                                                           |
| deep learning                            | no         | Used exclusively for learning in the classroom setting, simulation learning or online learning                      |
| Deliberate practice                      | No         | Used to describing specific learning/ teaching activities                                                           |
| Didactic learning                        | No         | Used exclusively for learning in the classroom setting                                                              |
| dual level learning                      | No         | Used to describe a specific way of organizing classroom learning                                                    |
| empathy learning                         | no         | Used to describe the learning of a specific skill (ie empathy)                                                      |
| Enquiry based learning                   | no         | Used to describing specific learning/ teaching activities                                                           |
| Experiential learning                    | yes        | Is as an equivalent to learning in clinical practice                                                                |
| Experimental learning                    | yes        | Is as an equivalent to learning in clinical practice                                                                |
| Hidden curriculum                        | yes        | Although this is not an equivalent to learning in practice, we decided to include this concept as it is used to     |

|                                                                                                                                                                                     |     |                                                                                                                                    |
|-------------------------------------------------------------------------------------------------------------------------------------------------------------------------------------|-----|------------------------------------------------------------------------------------------------------------------------------------|
|                                                                                                                                                                                     |     | describe a way in which knowledge and valued are transmitted in clinical practice outside specific teaching or learning activities |
| Informal learning                                                                                                                                                                   | yes | Is used as an equivalent to learning in clinical practice                                                                          |
| (Work) integrated learning                                                                                                                                                          | yes | Is (in some cases) <sup>2</sup> used as an equivalent to learning in practice                                                      |
| Integrative learning                                                                                                                                                                | No  | Used for describing specific teaching and learning strategies                                                                      |
| Intentional learning                                                                                                                                                                | no  | Used to describe specific learning/ teaching activities <sup>3</sup> or competencies <sup>4</sup>                                  |
| interprofessional learning                                                                                                                                                          | no  | Used to describe a specific way of organizing learning in clinical practice (ie learning with and from other disciplines)          |
| Learning by doing                                                                                                                                                                   | yes | Used as an equivalent to learning in clinical practice                                                                             |
| learning clinical nursing                                                                                                                                                           | yes | Used as an equivalent to learning in clinical practice                                                                             |
| learning from/through experience                                                                                                                                                    | yes | Used as an equivalent to learning in clinical practice                                                                             |
| learning from clinical placement experience                                                                                                                                         | yes | Used as an equivalent to learning in clinical practice                                                                             |
| learning from practice                                                                                                                                                              | yes | Used as an equivalent to learning in clinical practice                                                                             |
| learning in a clinical environment                                                                                                                                                  | yes | Used as an equivalent to learning in clinical practice                                                                             |
| learning in practice/ learning in practice environment/ learning in practice setting/learning in a clinical practicum                                                               | yes | Used as an equivalent to learning in clinical practice                                                                             |
| Learning in the clinical field/learning in the clinical context/ Learning in the clinical setting/Learning in the clinical nursing environment/learning in the clinical environment | yes | Used as an equivalent to learning in clinical practice                                                                             |
| learning in the practice setting                                                                                                                                                    | yes | Used as an equivalent to learning in clinical practice                                                                             |
| Learning on the job                                                                                                                                                                 | yes | Used as an equivalent to learning in clinical practice                                                                             |
| Learning on the workplace/ workplace learning/learning in the workplace                                                                                                             | yes | Used as an equivalent to learning in clinical practice                                                                             |
| learning process                                                                                                                                                                    | yes | Used as an equivalent to learning in clinical practice <sup>5</sup>                                                                |
| Learning situation                                                                                                                                                                  | no  | Used to describe learning circumstances rather than the learning process itself                                                    |
| learning the practice of nursing                                                                                                                                                    | yes | Used as an equivalent to learning in clinical practice <sup>6</sup>                                                                |
| learning through experience                                                                                                                                                         | yes | Used as an equivalent to learning in clinical practice                                                                             |
| learning trajectories                                                                                                                                                               | no  | Used to describe learning in a specific program <sup>7</sup>                                                                       |
| Meaningful learning                                                                                                                                                                 | no  | Used exclusively for learning in the classroom setting <sup>8</sup> or simulation learning <sup>9</sup>                            |
| Online learning                                                                                                                                                                     | no  | Used for specific learning activities outside the clinical                                                                         |

|                                                            |                  |                                                                                                                                                                                                 |
|------------------------------------------------------------|------------------|-------------------------------------------------------------------------------------------------------------------------------------------------------------------------------------------------|
|                                                            |                  | setting                                                                                                                                                                                         |
| Peer based learning/ peer learning/ peer assisted learning | yes <sup>1</sup> | Used to describe a specific central way learning in clinical practice                                                                                                                           |
| Perceptual learning                                        | no               | Used to describe a specific technique to learn in clinical practice                                                                                                                             |
| placement learning                                         | Yes              | Used as an equivalent to learning in clinical practice                                                                                                                                          |
| Practice learning                                          | Yes              | Used as an equivalent to learning in clinical practice                                                                                                                                          |
| Practice-based learning                                    | Yes              | Used as an equivalent to learning in clinical practice                                                                                                                                          |
| problem-based learning/ problem based learning             | no               | Used exclusively for learning in the classroom setting, simulation learning or online learning                                                                                                  |
| professional development                                   | No               | Used to describe the result of learning in the clinical setting, rather than the process                                                                                                        |
| Reflective learning                                        | No               | Used to describe specific teaching and learning strategies                                                                                                                                      |
| Self-directed learning                                     | yes              | Used (at least in some studies, eg <sup>10</sup> ) to describe a very important component of learning in the clinical setting, that is, the part that takes place at the learner's initiative). |
| Self-regulated learning                                    | yes              | Used (at least in some studies, eg <sup>11</sup> ) to describe a major part of learning in the clinical setting, that is, the part that takes place at the learner's initiative).               |
| Service learning                                           | no               | Used for the particular combination of providing (voluntary) community service and learning in practice                                                                                         |
| Shared learning                                            | No               | Used to describe a specific way of organizing learning in clinical practice (ie learning from and with others)                                                                                  |
| Situated learning                                          | yes              | Used as an equivalent to learning in clinical practice, <sup>12</sup>                                                                                                                           |
| socialisation/ socialization                               | yes              | Used to describe a major part of learning in clinical practice                                                                                                                                  |
| student learning                                           | yes              | Is, in some cases (eg <sup>13</sup> ) used to describe learning in clinical practice)                                                                                                           |
| task-based learning                                        | No               | Used to describe a specific way of organizing learning in clinical practice (ie around tasks <sup>14</sup> )                                                                                    |
| team-based learning                                        | No               | Used exclusively for learning in the classroom setting                                                                                                                                          |
| Transformational learning                                  | No               | Used to describe the result of learning in the clinical setting, rather than the process <sup>15</sup>                                                                                          |
| Transformative learning                                    | yes <sup>2</sup> | Used to describe both process and outcomes of learning <sup>16</sup>                                                                                                                            |
| Ward based learning                                        | Yes              | Used as an equivalent to learning in clinical practice                                                                                                                                          |
| Work-based learning                                        | Yes              | Used as an equivalent to learning in clinical practice                                                                                                                                          |
| work-integrated learning                                   | Yes              | Used as an equivalent to learning in clinical practice                                                                                                                                          |

<sup>1</sup> Excluded in first instance as it appeared to be used to study interventions or specific organizational models. On the basis of results in search step 2, the concept was included in second instance.

<sup>2</sup> Excluded in first instance as it appeared to be used to study classroom learning only. On the basis of results in search step 2, the concept was included in second instance.

1  
2  
3  
4  
5  
6  
7  
8  
9  
10  
11  
12  
13  
14  
15  
16  
17  
18  
19  
20  
21  
22  
23  
24  
25  
26  
27  
28  
29  
30  
31  
32  
33  
34  
35  
36  
37  
38  
39  
40  
41  
42  
43  
44  
45  
46  
47  
48  
49  
50  
51  
52  
53  
54  
55  
56  
57  
58  
59  
60

|                    |     |                                                        |
|--------------------|-----|--------------------------------------------------------|
| workplace learning | Yes | Used as an equivalent to learning in clinical practice |
|--------------------|-----|--------------------------------------------------------|

For peer review only

**Supplementary file 5. Excluded full text articles and main reason for exclusion**

|     |                                                                                                                                                              |
|-----|--------------------------------------------------------------------------------------------------------------------------------------------------------------|
| 1.  | Not been able to retrieve full text of this study                                                                                                            |
| 2.  | Study is about influencing factors, interventions, organizational models, personal characteristics affecting learning instead of the learning process itself |
| 3.  | Study is not about learning/ not possible to separate findings about learning from other findings                                                            |
| 4.  | No original study or review                                                                                                                                  |
| 5.  | Study is incomplete (eg no results)                                                                                                                          |
| 6.  | Study is about a research methodology                                                                                                                        |
| 7.  | Another study within the same project is already included, this study offers no additional findings                                                          |
| 8.  | Study is too specific                                                                                                                                        |
| 9.  | Study is not about clinical practice/ not possible to separate findings about clinical practice from other findings                                          |
| 10. | Study is not about nursing students/not about hospital setting                                                                                               |

|                                                        | 1 | 2 | 3 | 4 | 5 | 6 | 7 | 8 | 9 | 10 |
|--------------------------------------------------------|---|---|---|---|---|---|---|---|---|----|
| Abe (1977)                                             | x |   |   |   |   |   |   |   |   |    |
| Allan, Smith, and O'Driscoll (2011)                    |   | x |   |   |   |   |   |   |   |    |
| Alves and Cogo (2014)                                  |   |   | x |   |   |   |   |   |   |    |
| Andrade Bezerra, Soares Campos, and Da Silveira (2005) | x |   |   |   |   |   |   |   |   |    |
| Arlton and Miercort (1980)                             |   |   |   | x |   |   |   |   |   |    |
| Arrigoni et al. (2017)                                 |   |   |   | x |   |   |   |   |   |    |
| Baldwin, Mills, Birks, and Budden (2014)               |   | x |   |   |   |   |   |   |   |    |
| Barry, Ward, and Walter (2017)                         |   |   |   |   |   | x |   |   |   |    |
| Brackenreg (2004)                                      |   | x |   |   |   |   |   |   |   |    |
| Burnard (1991)                                         |   |   |   | x |   |   |   |   |   |    |
| Burnard (1992)                                         |   |   |   |   |   |   | x |   |   |    |
| Charneia (2007)                                        | x |   |   |   |   |   |   |   |   |    |
| Coetzee (2004)                                         |   |   |   |   |   |   |   | x |   |    |
| Cope, Cuthbertson, and Stoddart (2000)                 |   | x |   |   |   |   |   |   |   |    |
| Corbett (1973)                                         |   | x |   |   |   |   |   |   |   |    |
| Cowman (1998)                                          |   | x |   |   |   |   |   |   |   |    |
| Crouch (1991)                                          | x |   |   |   |   |   |   |   |   |    |
| Cullingford (1991)                                     | x |   |   |   |   |   |   |   |   |    |
| de Jesus, Sena, and Andrade (2014)                     |   |   |   |   |   |   |   |   | x |    |
| de Jesus et al. (2014)                                 |   | x |   |   |   |   |   |   |   |    |
| Durgante Alves and Petersen Cogo (2015)                |   |   | x |   |   |   |   |   |   |    |
| Edwards (2013)                                         |   |   |   |   |   | x |   |   |   |    |
| Egginton (2002)                                        | x |   |   |   |   |   |   |   |   |    |
| Endacott, Scholes, Freeman, and Cooper (2003)          |   | x |   |   |   |   |   |   |   |    |
| Evans (1987)                                           |   |   |   | x |   |   |   |   |   |    |
| Friedman (1981)                                        | x |   |   |   |   |   |   |   |   |    |
| Green and Holloway (1997)                              |   |   |   |   |   | x |   |   |   |    |
| Hauge (1999)                                           | x |   |   |   |   |   |   |   |   |    |
| Hauge (1999)                                           | x |   |   |   |   |   |   |   |   |    |
| Henderson et al. (2018)                                |   | x |   |   |   |   |   |   |   |    |
| Henderson et al. (2018)                                | x |   |   |   |   |   |   |   |   |    |
| Hill (2016)                                            |   |   | x |   |   |   |   |   |   |    |
| Hold, Blake, and Ward (2015)                           |   |   |   |   |   |   |   |   | x |    |
| Holmsen (2010)                                         |   | x |   |   |   |   |   |   |   |    |



- 1  
2  
3 Baldwin, A., Mills, J., Birks, M., & Budden, L. (2014). Role modeling in undergraduate nursing  
4 education: an integrative literature review. *Nurse Educ Today*, 34(6), e18-26.  
5 doi:10.1016/j.nedt.2013.12.007  
6  
7 Barry, S., Ward, L., & Walter, R. (2017). Exploring Nursing Students' Experiences of Learning Using  
8 Phenomenography: A Literature Review. *J Nurs Educ*, 56(10), 591-598.  
9 doi:10.3928/01484834-20170918-03  
10  
11 Brackenreg, J. (2004). Issues in reflection and debriefing: how nurse educators structure experiential  
12 activities. *Nurse Educ Pract*, 4(4), 264-270. doi:10.1016/j.nepr.2004.01.005  
13  
14 Burnard, P. (1991). Perceptions of experiential learning. *Nurs Times*, 87(8), 47.  
15  
16 Burnard, P. (1992). Defining experiential learning: nurse tutors' perceptions. *Nurse Educ Today*, 12(1),  
17 29-36.  
18  
19 Charneia, E. (2007). Nursing students' perceptions of role modeling as it relates to learning in the  
20 clinical environment. *Ph.D.*, 307 p-307 p.  
21  
22 Coetzee, M. (2004). Learning to nurse children: towards a model for nursing students. *J Adv Nurs*,  
23 47(6), 639-648. doi:10.1111/j.1365-2648.2004.03152.x  
24  
25 Cope, P., Cuthbertson, P., & Stoddart, B. (2000). Situated learning in the practice placement. *J Adv*  
26 *Nurs*, 31(4), 850-856.  
27  
28 Corbett, D. (1973). Student nurses share in clinical learning. *Can Nurse*, 69(11), 21.  
29  
30 Cowman, S. (1998). The approaches to learning of student nurses in the Republic of Ireland and  
31 Northern Ireland. *J Adv Nurs*, 28(4), 899-910.  
32  
33 Crouch, S. (1991). The value of clinical learning. *Nursing (Lond)*, 4(32), 9-11.  
34  
35 Cullingford, S. (1991). Learning from experience. *Senior Nurse*, 11(6), 25-28.  
36  
37 de Jesus, I. S., Sena, E. L., & Andrade, L. M. (2014). Learning in the informal spaces and re-signification  
38 of the existence of undergraduate students of nursing. *Rev Lat Am Enfermagem*, 22(5), 731-  
39 738.  
40  
41 Durgante Alves, E. A. T., & Petersen Cogo, A. L. (2015). NURSING STUDENTS' PERCEPTION OF THE  
42 LEARNING PROCESS IN A HOSPITAL SETTING. *Rev Gaucha Enferm*, 36(1), 102-109.  
43 doi:10.1590/1983-1447.2014.01.42870  
44  
45 Edwards, S. L. (2013). Learning from Practice: the Value of Story in Nurse Education. *Ph.D.*, N.PAG p-  
46 N.PAG p.  
47  
48 Egginton, D. (2002). Learning from experience: a first-year student reflects. *Paediatr Nurs*, 14(10), 30-  
49 31.  
50  
51 Endacott, R., Scholes, J., Freeman, M., & Cooper, S. (2003). The reality of clinical learning in critical  
52 care settings: a practitioner:student gap? *J Clin Nurs*, 12(5), 778-785.  
53  
54 Evans, N. (1987). Quest: Learning from experience. *Nurs Times*, 83(42), 49-50.  
55  
56 Friedman, F. B. (1981). Learning by doing. *J Pract Nurs*, 31(6), 20-23.  
57  
58 Green, A. J., & Holloway, D. G. (1997). Using a phenomenological research technique to examine  
59 student nurses' understandings of experiential teaching and learning: a critical review of  
60 methodological issues. *J Adv Nurs*, 26(5), 1013-1019.  
61  
62 Hauge, K. W. (1999). To perceive and to be perceived. *Nordic Journal of Nursing Research & Clinical*  
63 *Studies / Vård i Norden*, 19(2), 37-41.  
64  
65 Henderson, A., Harrison, P., Rowe, J., Edwards, S., Barnes, M., Henderson, S., & Henderson, A. (2018).  
66 Students take the lead for learning in practice: A process for building self-efficacy into  
67 undergraduate nursing education. *Nurse Educ Pract*, 31, 14-19.  
68 doi:10.1016/j.nepr.2018.04.003  
69  
70 Hill, L. A. (2016). Telling their stories: Using Appreciative Inquiry to explore the lived experience of  
71 students in clinical nursing education. *Telling Their Stories: Using Appreciative Inquiry to*  
72 *Explore the Lived Experience of Students in Clinical Nursing Education*, 1-1.  
73  
74 Hold, J. L., Blake, B. J., & Ward, E. N. (2015). Perceptions and experiences of nursing students enrolled  
75 in a palliative and end-of-life nursing elective: A qualitative study. *Nurse Educ Today*, 35(6),  
76 777-781. doi:10.1016/j.nedt.2015.02.011  
77  
78  
79  
80



- 1  
2  
3 Holmsen, T. L. (2010). Influences on nursing students' confidence and learning in clinical practice. *Nordic Journal of Nursing Research & Clinical Studies / Vård i Norden*, 30(1), 24-28.
- 4 Ironside, P. M., McNelis, A. M., & Ebright, P. (2014). Clinical education in nursing: rethinking learning  
5 in practice settings. *Nurs Outlook*, 62(3), 185-191. doi:10.1016/j.outlook.2013.12.004
- 6  
7 Kosowski, M. M. (1995). Clinical learning experiences and professional nurse caring: a critical  
8 phenomenological study of female baccalaureate nursing students. *J Nurs Educ*, 34(5), 235-  
9 242.
- 10  
11 Kuiper, R. A. (2004). Nursing reflections from journaling during a perioperative internship. *Aorn j*,  
12 79(1), 195-198, 201-196, 209-112 passim.
- 13 Levett-Jones, T. L. (2007). Facilitating reflective practice and self-assessment of competence through  
14 the use of narratives. *Nurse Educ Pract*, 7(2), 112-119. doi:10.1016/j.nepr.2006.10.002
- 15 Love, C. (1996). Using a diary to learn the patient's perspective. *Prof Nurse*, 11(5), 286-288.
- 16 MacFarlane, E., & Hart, J. D. (1995). Self-directed learning experiences for senior BScN students. *Can*  
17 *Nurse*, 91(10), 17.
- 18  
19 May, N., & Veitch, L. (1998). Working to learn and learning to work: placement experience of Project  
20 2000 nursing students in Scotland. *Nurse Educ Today*, 18(8), 630-636.
- 21 Montagna, L., Benaglio, C., & Zannini, L. (2010). [Reflective writing in nursing education: background,  
22 experiences and methods]. *Assist Inferm Ric*, 29(3), 140-152.
- 23 More, P., & Conklin, J. (1995). Investigating student learning: the Katz-Henry model. *J Nurs Educ*,  
24 34(3), 143-144.
- 25 Newton, J. M., Billett, S., & Ockerby, C. M. (2009). Journeying through clinical placements--an  
26 examination of six student cases. *Nurse Educ Today*, 29(6), 630-634.  
27 doi:10.1016/j.nedt.2009.01.009
- 28  
29 Nolan, C. A. (1998). Learning on clinical placement: the experience of six Australian student nurses.  
30 *Nurse Educ Today*, 18(8), 622-629.
- 31 O'Shea, E. (2003). Self-directed learning in nurse education: a review of the literature. *J Adv Nurs*,  
32 43(1), 62-70.
- 33 Paliadelis, P., & Wood, P. (2016). Learning from clinical placement experience: Analysing nursing  
34 students' final reflections in a digital storytelling activity. *Nurse Educ Pract*, 20, 39-44.  
35 doi:10.1016/j.nepr.2016.06.005
- 36  
37 Papp, I., Markkanen, M., & Von Bonsdorff, M. (2001). Student, teacher, mentor -- student nurses  
38 learning experiences in clinical practice. *Sairaanhoidaja*, 74(8), 26-29.
- 39 Polifroni, E. C., Packard, S. A., Shah, H. S., & MacAvoy, S. (1995). Activities and interactions of  
40 baccalaureate nursing students in clinical practica. *J Prof Nurs*, 11(3), 161-169.
- 41 Rajeswaran, L. (2016). Clinical Experiences of Nursing Students at a Selected Institute of Health  
42 Sciences in Botswana. *Health Science Journal*, 10(6), 1-6. doi:10.21767/1791-809X.1000471
- 43 Reutter, L., Field, P. A., Campbell, I. E., & Day, R. (1997). Socialization into nursing: nursing students  
44 as learners. *J Nurs Educ*, 36(4), 149-155.
- 45 Rodríguez García, M., Ruiz López, M., González Sanz, P., Fernández Trinidad, M., & De Blas Gómez, I.  
46 (2014). Life experiences of the student nursing 4th in the practicum. *Cultura de los Cuidados*,  
47 18(38), 25-33.
- 48  
49 Sandvik, A.-H., Melender, H.-L., Jonsén, E., Jönsson, G., Salmu, M., & Hilli, Y. (2012). Nursing  
50 students'experiences of the first clinical education-a nordic quantitative study. *Nordic Journal*  
51 *of Nursing Research & Clinical Studies / Vård i Norden*, 32(3), 20-25.
- 52 Shahsavari, H., Zare, Z., Parsa-Yekta, Z., Griffiths, P., & Vaismoradi, M. (2018). Learning Situations in  
53 Nursing Education: A Concept Analysis. *Res Theory Nurs Pract*, 32(1), 23-45.  
54 doi:10.1891/0000-000y.32.1.23
- 55  
56 Shin, K. R. (2000). The meaning of the clinical learning experience in Korean nursing students. *Journal*  
57 *of Nursing Education*, 39(6), 259-265.
- 58 Shirazi, F., Sharif, F., Molazem, Z., & Alborzi, M. (2017). Dynamics of self-directed learning in M.Sc.  
59 nursing students: A qualitative research. *J Adv Med Educ Prof*, 5(1), 33-41.
- 60

- 1  
2  
3 Skaalvik, M. W., Normann, H. K., & Henriksen, N. (2010). To what extent does the oral shift report  
4 stimulate learning among nursing students? A qualitative study\*. *J Clin Nurs*, *19*(15-16),  
5 2300-2308. doi:10.1111/j.1365-2702.2010.03217.x  
6 Smith, P., & Morrison, J. (2006). Clinical clerkships: students can structure their own learning. *Med*  
7 *Educ*, *40*(9), 884-892. doi:10.1111/j.1365-2929.2006.02546.x  
8 Spouse, J. (2001). Workplace learning: pre-registration nursing students' perspectives. *Nurse Educ*  
9 *Pract*, *1*(3), 149-156. doi:10.1054/nepr.2001.0024  
10 Tagliareni, E. (1991). What and how of student learning activities. *NLN Publ*(15-2411), 65-91.  
11 Thrysoe, L., Hounsgaard, L., Dohn, N. B., & Wagner, L. (2010). Participating in a community of  
12 practice as a prerequisite for becoming a nurse - Trajectories as final year nursing students.  
13 *Nurse Educ Pract*, *10*(6), 361-366. doi:10.1016/j.nepr.2010.05.004  
14 Tupala, M., Tossavainen, K., & Turunen, H. (2004). PHN students' target levels of competencies in  
15 children and adolescents' nursing. *Hoitotiede*, *16*(3), [98]-110.  
16 Vesanto, A., & Munnukka, T. (1996). Work as student primary nurse in promoting professional skills  
17 of student nurses. *Hoitotiede*, *8*(1), 20-28.  
18 Wilson, M. E. (1994). Nursing student perspective of learning in a clinical setting. *J Nurs Educ*, *33*(2),  
19 81-86.  
20 Wong, F. K. Y., & Lee, W. M. (2000). A phenomenological study of early nursing experiences in Hong  
21 Kong. *J Adv Nurs*, *31*(6), 1509-1517. doi:10.1046/j.1365-2648.2000.01433.x  
22 Zhao, Y., Kuan, H. K., Chung, J. O. K., Chan, C. K. Y., & Li, W. H. C. (2018). Students' approaches to  
23 learning in a clinical practicum: A psychometric evaluation based on item response theory.  
24 *Nurse Educ Today*, *66*, 179-186. doi:10.1016/j.nedt.2018.04.015  
25  
26  
27  
28  
29  
30  
31  
32  
33  
34  
35  
36  
37  
38  
39  
40  
41  
42  
43  
44  
45  
46  
47  
48  
49  
50  
51  
52  
53  
54  
55  
56  
57  
58  
59  
60

# BMJ Open

## How do undergraduate nursing students learn in the hospital setting? A scoping review of conceptualisations, operationalisations and learning activities.

|                                 |                                                                                                                                                                                                                                                                                                                                                                                                                                                                                                                                                                                                                                                                                                                                                                                                                                                                                                                                                                                                                                                   |
|---------------------------------|---------------------------------------------------------------------------------------------------------------------------------------------------------------------------------------------------------------------------------------------------------------------------------------------------------------------------------------------------------------------------------------------------------------------------------------------------------------------------------------------------------------------------------------------------------------------------------------------------------------------------------------------------------------------------------------------------------------------------------------------------------------------------------------------------------------------------------------------------------------------------------------------------------------------------------------------------------------------------------------------------------------------------------------------------|
| Journal:                        | <i>BMJ Open</i>                                                                                                                                                                                                                                                                                                                                                                                                                                                                                                                                                                                                                                                                                                                                                                                                                                                                                                                                                                                                                                   |
| Manuscript ID                   | bmjopen-2019-029397.R1                                                                                                                                                                                                                                                                                                                                                                                                                                                                                                                                                                                                                                                                                                                                                                                                                                                                                                                                                                                                                            |
| Article Type:                   | Original research                                                                                                                                                                                                                                                                                                                                                                                                                                                                                                                                                                                                                                                                                                                                                                                                                                                                                                                                                                                                                                 |
| Date Submitted by the Author:   | 25-Jun-2019                                                                                                                                                                                                                                                                                                                                                                                                                                                                                                                                                                                                                                                                                                                                                                                                                                                                                                                                                                                                                                       |
| Complete List of Authors:       | Stoffels, Malou; Amsterdam UMC, Vrije Universiteit Amsterdam, VUmc School of Medical Sciences, Department of Research in Education; Amsterdam UMC, Vrije Universiteit Amsterdam, Amstel Academie Peerdeman, Saskia; Amsterdam UMC, Vrije Universiteit Amsterdam, VUmc School of Medical Sciences, Department of Research in Education; Amsterdam UMC, Vrije Universiteit Amsterdam, Department of Neurosurgery<br>Daelmans, Hester; Amsterdam UMC, Vrije Universiteit Amsterdam, VUmc School of Medical Sciences, Department of Research in Education; Amsterdam UMC, Vrije Universiteit Amsterdam, VUmc School of Medical Sciences, Department of Skills Training<br>Ket, J.C.F. ; Amsterdam UMC, Vrije Universiteit Amsterdam, VUmc School of Medical Sciences, Medical Library<br>Kusurkar, Rashmi; Amsterdam UMC, Vrije Universiteit Amsterdam, VUmc School of Medical Sciences, Department of Research in Education; Vrije Universiteit Amsterdam, Faculty of Psychology and Education, LEARN! Research institute for learning and education |
| <b>Primary Subject Heading</b>: | Nursing                                                                                                                                                                                                                                                                                                                                                                                                                                                                                                                                                                                                                                                                                                                                                                                                                                                                                                                                                                                                                                           |
| Secondary Subject Heading:      | Research methods                                                                                                                                                                                                                                                                                                                                                                                                                                                                                                                                                                                                                                                                                                                                                                                                                                                                                                                                                                                                                                  |
| Keywords:                       | Nursing, EDUCATION & TRAINING (see Medical Education & Training), MEDICAL EDUCATION & TRAINING, Clinical learning                                                                                                                                                                                                                                                                                                                                                                                                                                                                                                                                                                                                                                                                                                                                                                                                                                                                                                                                 |
|                                 |                                                                                                                                                                                                                                                                                                                                                                                                                                                                                                                                                                                                                                                                                                                                                                                                                                                                                                                                                                                                                                                   |

SCHOLARONE™  
Manuscripts

1  
2  
3 **How do undergraduate nursing students learn in the hospital setting? A**  
4 **scoping review of conceptualisations, operationalisations and learning**  
5 **activities.**  
6  
7  
8  
9

10  
11  
12  
13 Malou Stoffels<sup>1,2</sup>; Saskia M. Peerdeman<sup>1,3,4</sup>; Hester E.M. Daelmans<sup>1,5</sup>; Johannes C.F. Ket<sup>6</sup>; Rashmi A.  
14 Kusurkar<sup>1,7</sup>.  
15

16  
17 **Correspondence**  
18

19  
20 Correspondence should be addressed to Malou Stoffels, Amsterdam UMC, Vrije Universiteit  
21 Amsterdam, Department of Research in Education, PO box 7057, 1007 MB Amsterdam, the  
22 Netherlands; telephone: +31204446241; e-mail: m.stoffels@vumc.nl.  
23  
24

25  
26 <sup>1</sup> Amsterdam UMC, Vrije Universiteit Amsterdam, VUmc School of Medical Sciences, Department of  
27 Research in Education, Amsterdam, the Netherlands  
28

29  
30 <sup>2</sup>Amsterdam UMC, VUmc Amstel Academy, Amsterdam, the Netherlands  
31

32  
33 <sup>3</sup>Amsterdam UMC, Vrije Universiteit Amsterdam, Department of neurosurgery, Amsterdam, the  
34 Netherlands  
35

36  
37 <sup>4</sup> Amsterdam UMC, Univ of Amsterdam, Faculty of Medicine, Amsterdam, the Netherlands  
38

39  
40 <sup>5</sup>Amsterdam UMC, Vrije Universiteit Amsterdam, VUmc school of Medical Sciences, Department of  
41 Skills Training, Amsterdam, the Netherlands  
42

43  
44 <sup>6</sup>Amsterdam UMC, Vrije Universiteit Amsterdam, VUmc School of Medical Sciences, Medical Library,  
45 Amsterdam, the Netherlands  
46

47  
48 <sup>7</sup>Vrije Universiteit Amsterdam, Faculty of Psychology and Education, LEARN! Research Institute for  
49 Learning and Education, Amsterdam, the Netherlands  
50

51  
52 **Word count**  
53

54  
55 4030  
56

57  
58 **Key words**  
59

60 Undergraduate nursing education, learning in practice

## ABSTRACT

**Objectives.** Despite its relevance to nursing education, there are gaps in the knowledge about clinical learning and the terminology to describe this. This study aimed to examine how concepts equivalent to “learning in practice” are used and operationalised and which learning activities are reported in the nursing education literature. The final aim was to propose terminology to guide future studies.

**Design** The scoping framework proposed by Arksey and O’Malley was used. Two systematic searches were conducted in PubMed, EBSCO/ERIC and EBSCO/CINAHL between May and September 2018; first to identify concepts equivalent to ‘learning in practice’ and second to find studies operationalising these concepts. Eligible articles were studies that examined the regular learning of undergraduate nursing students in the hospital setting. Conceptualisations, theoretical frameworks and operationalisations were mapped descriptively. Results relating to how students learn were synthesised using thematic analysis. Quality assessment was performed using the Critical Appraisal Skills Programme (CASP) checklist.

**Results** From 9360 abstracts, 17 articles were included. Five studies adopted a general, yet not explained, synonym for learning in practice, the other studies approached the topic focusing on the social, unplanned, or active nature of learning. All studies used a qualitative approach. The small number of studies and medium study quality hampered a thorough comparison of concepts. The synthesis of results revealed five types of learning activities, in which autonomy, interactions, and cognitive processing were central themes. These themes were acknowledged by an expert panel.

**Conclusions** The current body of literature offers little guidance on the use of specific concepts to study clinical learning. Studies agree on the key elements of clinical learning. In future research, formal and informal components of learning should be addressed, and clarity about desirable outcomes of clinical learning should be provided. Also, the interplay between behaviour and cognitive processing should be further investigated.

## ARTICLE SUMMARY

Strengths and limitations of this study

- This study followed a rigorous design, using an established research framework, a comprehensive two-step search strategy and a well-documented selection process.
- The analysis of both conceptualisations, study quality and study results allowed for the identification of quantitative and qualitative gaps in the literature.
- A limitation is that the literature search only covered undergraduate nursing education in the hospital setting, while a comparison with literature on learning in practice in other health professions would enrich our understanding of potential conceptualizations.

## INTRODUCTION

Learning in the clinical setting is crucial for becoming a competent nurse<sup>1</sup>. However, although a vast body of knowledge exists on factors that influence learning, the process itself remains underexposed in the literature<sup>2</sup>. Understanding learning in the clinical setting can help design, supervise and evaluate individual learning trajectories. In the nursing education literature, just as in other health professions education literature, different terms are used to describe and study learning in clinical practice, with different underlying theoretical or conceptual frameworks.

This study aimed to examine how different concepts equivalent to “learning in practice” are used and operationalised and which learning activities are reported in the nursing education literature. The final aim was to propose a terminology to guide future studies. To our knowledge, the only study that included distinct concepts of clinical learning in the health setting in a review before, was a concept analysis of work-based learning in health care education from 2009<sup>3</sup>. The authors identified common attributes, enabling factors and consequences of workplace learning and proposed a definition. The current review built on this work by critically examining the use of these concepts within the context of undergraduate nursing education and analysing their outcomes.

To enable comparison between studies, we focused on undergraduate students in the general hospital setting. This context is the traditional setting for nursing training and comprises a variety of factors that may be relevant for learning, such as the presence of peers and different healthcare professionals, as well as complex and acute patients, thereby offering a wide array of multidimensional learning opportunities<sup>4</sup>. Moreover, we limited our study to undergraduate (also called bachelor, diploma or associate degree) education, which is the initial training that prepares for registration as a nurse, in which students learn the profession and shape their identity. As a final demarcation allowing for the comparison between concepts, we focused on studies about how students learn during their regular day to day work at the ward, instead of evaluations of specific interventions or models.

## METHODS AND ANALYSIS

The scoping review approach was chosen, as it can help understand complex concepts through clarifying definitions and conceptual boundaries<sup>5</sup> and enables to identify key concepts and gaps in the literature<sup>6</sup>. The approach developed by Arksey and O'Malley<sup>7</sup> and refined by Levac, et al.<sup>8</sup> and the Joanna Briggs institute<sup>9</sup> was used, consisting of the six stages (1) identifying the research question; (2) identifying relevant studies; (3) selecting studies; (4) charting the data; (5) collating, summarizing and reporting the results; (6) expert consultation. Reporting on this scoping review followed the PRISMA Extension for Scoping Review checklist<sup>10</sup>, as outlined in supplementary file 1.

1  
2  
3 The review followed an a priori developed research protocol <sup>11</sup> (see supplementary file 2) with a little  
4 deviation by choosing the CASP checklist over the quality indicators of Buckley et al. <sup>12</sup> for quality  
5 assessment, as this allowed for more specific and systematic quality assessment. As anticipated,  
6 study questions and refined inclusion criteria were added during the search process.  
7  
8  
9

### 10 Stage 1. Identifying the research question

11 The original research question was:

- 12  
13  
14 - How are different concepts that are used as an equivalent to learning in the hospital setting  
15 operationalised in the undergraduate nursing education literature?  
16  
17

18  
19 As scoping is an iterative process, the following research question was added based on the findings  
20 along the search process:  
21  
22

### 23 24 Which activities do undergraduate nursing students learn from the clinical 25 setting?" Stage 2. Identify relevant studies

26  
27 As suggested by the Joanna Briggs institute<sup>9</sup>, a comprehensive search strategy was iteratively  
28 developed (by MS and JCFK) following the Peer Review of Electronic Search Strategies (PRESS) 2015  
29 guideline statement<sup>13</sup>, starting with a broad search (search step 1) to inform the subsequent search  
30 strategy (search step 2). The different search queries were first developed for PubMed and later  
31 extended to EBSCO/ERIC and EBSCO/CINAHL. See our search strategy for both steps in  
32 supplementary file 3.  
33  
34  
35  
36

37  
38 In search step 1, from inception to May 2018 the terms 'learning in clinical practice' and  
39 'undergraduate nursing students' were combined to identify concepts that are used as an equivalent  
40 to 'learning in clinical practice' and could be included in the second search step. Eligible concepts  
41 were those relating to the process of clinical learning rather than specific aspects of it or associated  
42 factors. The first 200 abstracts were scanned by the two reviewers (MS and RAK) independently to  
43 extract potentially eligible concepts. As the same concepts had been selected by the two researchers,  
44 the first reviewer screened the rest of the abstracts. After all abstracts had been screened, all  
45 concepts were discussed between the two reviewers and a final selection of concepts to be included  
46 in the second search step was made. Disagreements were resolved through comparison of the  
47 concept with the inclusion criteria, informed by the abstracts. Potentially eligible concepts of which  
48 the meaning remained unclear after discussion, were also added to the list of concepts to be used in  
49 search step 2. Other concepts coming up during the search and selection process that appeared  
50 eligible, were added to the selection of concepts after discussion between the reviewers. See  
51 supplementary file 4 for concepts and reason for inclusion/exclusion in the second search step.  
52  
53  
54  
55  
56  
57  
58  
59  
60

1  
2  
3 In search step 2, between May and September 2018 each of the identified concepts was combined  
4 with 'undergraduate nursing students' to find studies operationalizing these concepts in the  
5 literature about nursing students' learning in practice. After these two searches, reference lists were  
6 checked for additional publications.  
7  
8  
9

### 10 Stage 3. Study selection

11 Two researchers (MS and RAK) independently screened abstracts from search step 2 and assessed  
12 the eligibility for full text retrieval. Selected full-text studies were compared between the reviewers  
13 with disagreements being resolved through discussion and consensus and with input from the full  
14 research team.  
15  
16  
17  
18  
19

20 The inclusion criteria were developed iteratively. The initial inclusion criteria were:

- 21 - Original research or reviews in peer reviewed journals that have learning in undergraduate  
22 clinical nursing practice in the hospital setting as one of their main topics, regardless of  
23 publication date and type of article.
- 24 - Studies that examine how students learn in the clinical hospital setting  
25  
26  
27  
28  
29

30 In line with the aim of the study, the inclusion criteria were refined to:

- 31 - Original research or reviews in peer reviewed journals, regardless of publication date type of  
32 article and study quality, that examine the learning of undergraduate nursing students in the  
33 clinical hospital setting as it regularly occurs  
34  
35  
36  
37  
38  
39

40 Resulting in the following exclusion criteria:

41 Studies:

- 42 - evaluating organizational models or interventions
- 43 - about factors influencing learning in clinical practice, including supervision styles, teaching  
44 methods and clinical learning environment
- 45 - outside the general hospital setting
- 46 - about very specific student populations, patient populations or settings (e.g. palliative care)  
47 generating results that might be limited to that setting
- 48 - about interprofessional learning
- 49 - about the acquisition of specific skills
- 50 - about student's 'experience' of clinical learning *without explicit reference to the learning*  
51 *process.*  
52  
53  
54  
55  
56  
57  
58  
59  
60



1  
2  
3 As the study aimed to examine how learning in practice is operationalised in peer-reviewed research,  
4 books, book reviews, commentaries, letters to the editor, PhD theses, and reports were excluded.  
5  
6

#### 7 Stage 4. Charting the data

8 Selected studies were documented including study characteristics (year, country, methodology,  
9 study question, study design, participants, outcomes, study quality), conceptualisation of learning in  
10 practice (definitions, theoretical underpinnings/rationale, operationalisations), results, learning  
11 activities, and study quality. Learning activities were extracted by two reviewers independently (MS  
12 and RAK), the other variables were initially charted by the first reviewer and checked by the second  
13 reviewer. The extraction form was calibrated during the first five studies and agreed upon after  
14 discussion between the first two reviewers. The completed form was discussed in the research team  
15 for accuracy and validity. Study findings that did not relate nursing students' learning in the clinical  
16 setting were marked. Although formal assessment of study quality is generally not performed in  
17 scoping reviews<sup>9</sup>, this is subject to debate<sup>6</sup>. Quality assessment of included studies by the Critical  
18 Appraisal Skills Programme (CASP)<sup>14</sup> was decided upon to address qualitative gaps in the literature<sup>8</sup>.  
19  
20  
21  
22  
23  
24  
25  
26  
27

#### 28 Stage 5. Collating, summarizing and reporting results

29 Data were analysed in two ways. First, descriptive account of concepts, theories, subsequent  
30 operationalisations and study quality were given and compared. Second, a data driven thematic  
31 analysis of the outcomes of the studies that are relevant for our research questions was conducted  
32 (Dixon-Woods, Agarwal, Jones, Young, & Sutton, 2005). To select those outcomes, first learning  
33 activities were separated from other study results by going through the result sections of the studies  
34 and underlining findings (themes, observations, quotes) that referred to how nursing students learn  
35 in the hospital setting. When possible, the original wordings were used in this analysis. Expressions  
36 that could not be understood outside the context of the article, were slightly rephrased. These  
37 findings were categorised using open coding, resulting in six classes of activities. All the results were  
38 compared and consolidated through consensus between MS and RAK.  
39  
40  
41  
42  
43  
44  
45  
46

#### 47 Stage 6. Expert consultation

48 In order to confirm our findings, we presented our analysis of the learning activities to four experts of  
49 different institutions in the Netherlands (one senior clinical educator, one coordinator of clinical  
50 education, one head of nursing education department, and coordinator of nursing education) Short  
51 semi-structured (telephone) interviews were conducted, in which a written summary of the findings  
52 was presented and respondents were asked a) whether they recognized the findings, b) whether  
53 they missed anything, c) whether they had any other comments on the findings.  
54  
55  
56  
57  
58  
59  
60

## Patient and public involvement

As education is essential for improving patient care, patients will eventually benefit from the body of knowledge this study contributes to. However, specific interests of patients have not been investigated. Patients have not been involved in the design or the conduct of the study. The consulted experts can be considered participants of this study, and will be informed about the results as soon as it has been published.

## RESULTS

### Search results

This initial search to identify concepts yielded 7211 abstracts, of which 5658 remained after removing duplicates. As the two reviewers (MS and RAK) reached full agreement on potentially eligible concepts after screening the first 200 abstracts, the remaining abstracts were screened by MS only. Seventy potentially eligible concepts were extracted. After discussion between the reviewers, 22 concepts were selected, to which three concepts were added later in the process, so the second search was run with 25 different concepts. See supplementary file 4 for concepts and reason for inclusion/exclusion in search step 2. The second search, using the 25 concepts selected in the initial search, generated 9360 results of which 5880 remained after duplicates were removed. For both abstracts and full texts, RAK and MS independently applied inclusion criteria and subsequently discussed their findings, resulting in the selection of 83 abstracts for full text reading and the inclusion of 17 studies (see supplementary file 5 for excluded full texts and reason for exclusion). Three pairs of studies were based on (partly) overlapping data<sup>15-20</sup>, but were all included as the results only partly overlapped. Reference list screening of the full text articles did not generate any extra results. See Figure 1 For a flow diagram of search step 2.

### General study characteristics

All included studies examined the process of undergraduate nursing students' learning in the clinical setting, as a result of their primary aim or as a significant secondary finding of a broader research question. Six of the studies<sup>17-22</sup> investigated undergraduate nursing students' learning in both the classroom setting and the clinical setting. One of the studies included not only nursing students, but also midwifery and social work students<sup>23</sup>. However, we restricted our data presentation to findings concerning nursing students in the clinical setting. All were primary studies, of which sixteen were

1  
2  
3 qualitative studies, and one mixed methods<sup>20</sup>. Publication year ranged from 1987-2018. Studies were  
4 conducted in different countries in Europe, Middle East, North America and Oceania.  
5  
6  
7

### 8 **Study quality**

9 Table 1 shows the quality of the included studies as assessed with the Critical Appraisal Skills  
10 Programme (CASP)<sup>14</sup> tool. In the only mixed method study included<sup>20</sup>, the quantitative data was  
11 analysed only descriptively and was used to inform the qualitative data. Therefore, this study was  
12 also appraised with the CASP.. To summarise, in the majority of studies it was unclear how the results  
13 answered the research question, because of a lack of clear aims, lack of clear operationalization, or  
14 both, in spite of clear descriptions of the process of data analysis and its outcomes.  
15  
16  
17  
18  
19  
20  
21  
22  
23  
24  
25  
26  
27  
28  
29  
30  
31  
32  
33  
34  
35  
36  
37  
38  
39  
40  
41  
42  
43  
44  
45  
46  
47  
48  
49  
50  
51  
52  
53  
54  
55  
56  
57  
58  
59  
60

|                                                                                      | Baraz, et al. <sup>24</sup> | Burnard <sup>19</sup> | Burnard <sup>20</sup> | Carey, et al. <sup>25</sup> | Dadgaran, et al. <sup>26</sup> | Gidman <sup>23</sup> | Grealish and Ranse <sup>27</sup> | Green and Hollo way <sup>21</sup> | Kear <sup>17</sup> | Kear <sup>18</sup> | Manninen <sup>15</sup> | Manninen, et al. <sup>16</sup> | Mays on and Hayward <sup>28</sup> | Rober ts <sup>29</sup> | Seyla ni, et al. <sup>22</sup> | Stock haus en <sup>30</sup> | Winds or <sup>31</sup> |
|--------------------------------------------------------------------------------------|-----------------------------|-----------------------|-----------------------|-----------------------------|--------------------------------|----------------------|----------------------------------|-----------------------------------|--------------------|--------------------|------------------------|--------------------------------|-----------------------------------|------------------------|--------------------------------|-----------------------------|------------------------|
| Was there a clear statement of the aims of the research?                             | yes                         | No                    | yes                   | yes                         | no                             | yes                  | yes                              | No                                | no                 | no                 | no                     | yes                            | yes                               | yes                    | no                             | yes                         | yes                    |
| Is a qualitative methodology appropriate?                                            | yes                         | Yes                   | yes                   | yes                         | yes                            | yes                  | yes                              | yes                               | yes                | yes                | yes                    | yes                            | yes                               | yes                    | yes                            | yes                         | yes                    |
| Was the research design appropriate to address the aims of the research?             | yes                         | can't tell            | yes                   | yes                         | no                             | yes                  | Can't tell                       | Can't tell                        | yes                | Can't tell         | yes                    | yes                            | yes                               | yes                    | no                             | yes                         | yes                    |
| Was the recruitment strategy appropriate to the aims of the research?                | yes                         | can't tell            | yes                   | yes                         | can't tell                     | yes                  | can't tell                       | can't tell                        | yes                | can't tell         | can't tell             | can't tell                     | can't tell                        | can't tell             | yes                            | no                          | no                     |
| Was the data collected in a way that addressed the research issue?                   | yes                         | can't tell            | can't tell            | yes                         | yes                            | can't tell           | yes                              | Can't tell                        | Can't tell         | yes                | Can't tell             | yes                            | yes                               | yes                    | Can't tell                     | yes                         | yes                    |
| Has the relationship between researcher and participants been adequately considered? | no                          | can't tell            | can't tell            | yes                         | no                             | yes                  | yes                              | No                                | no                 | no                 | no                     | can't tell                     | yes                               | can't tell             | no                             | no                          | no                     |
| Have ethical issues been taken into consideration?                                   | yes                         | can't tell            | Can't tell            | yes                         | yes                            | yes                  | can't tell                       | no                                | yes                | can't tell         | can't tell             | yes                            | yes                               | yes                    | yes                            | yes                         | no                     |
| Was the data analysis sufficiently rigorous?                                         | yes                         | Yes                   | yes                   | yes                         | yes                            | yes                  | yes                              | yes                               | yes                | yes                | can't tell             | yes                            | yes                               | can't tell             | yes                            |                             | yes                    |
| Is there a clear statement of findings?                                              | yes                         | Yes                   | No                    | yes                         | no                             | yes                  | yes                              | no                                | yes                | yes                | no                     | yes                            | yes                               | yes                    | yes                            | yes                         | yes                    |

Table 1. quality of the included studies as assessed with the Critical Appraisal Skills Programme (CASP)<sup>14</sup> tool

## Concepts, operationalisations and learning activities

Table 2 summarises the main concepts, operationalisations, frameworks, findings and learning activities of the 17 selected studies. Findings concerning conceptualisation and operationalisation as well as the results concerning learning activities will be discussed in the following paragraphs.

|                                    | Conceptualisation                                                                                |                                                                                                                                               |                                                                                                      | Operationalisation                                                                    | Learning activities                                                                                            |                                                                                                                                                                                                                                                                                                                                                                                                                                                                                                                                                                                                                                                                                                                            |
|------------------------------------|--------------------------------------------------------------------------------------------------|-----------------------------------------------------------------------------------------------------------------------------------------------|------------------------------------------------------------------------------------------------------|---------------------------------------------------------------------------------------|----------------------------------------------------------------------------------------------------------------|----------------------------------------------------------------------------------------------------------------------------------------------------------------------------------------------------------------------------------------------------------------------------------------------------------------------------------------------------------------------------------------------------------------------------------------------------------------------------------------------------------------------------------------------------------------------------------------------------------------------------------------------------------------------------------------------------------------------------|
|                                    | Main term(s) used to describe learning in practice<br><i>definition, if provided, in italics</i> | Main concept studied<br><i>Definition, if provided, in italics</i>                                                                            | Theoretical or conceptual framework for interpreting results/explicit reference to learning theories | Summary of operationalisation                                                         | Main study results, arranged according to the studies' objectives                                              | Learning activities for nursing students in the hospital setting, identified by the reviewers in the studies' result sections                                                                                                                                                                                                                                                                                                                                                                                                                                                                                                                                                                                              |
| Baraz, Memarian, and Vanaki (2014) | Learning process in clinical setting                                                             | Learning styles in clinical setting<br><i>Individual's preferred methods of knowledge and skill acquisition and information organization.</i> | No theoretical framework, used, reference to Kolb's stages of experiential learning                  | Semi-structured interviews about what and how students learn in the clinical setting. | Three clinical learning styles<br>1. Thoughtful observation<br>2. Learning by doing<br>3. Learning by thinking | <ul style="list-style-type: none"> <li>- careful observation of role models performance</li> <li>- reflective observation during clinical rounds</li> <li>- Participating in medical rounds clinical rounds</li> <li>- nursing rounds by instructors and classmates</li> <li>- active involvement in procedures caring for sensitive patients</li> <li>- Active collaboration with peers</li> <li>- maintaining continuity by making active patient contact and repeating nursing procedures</li> <li>- assuming responsibility for patient care</li> <li>- memorizing info by history taking</li> <li>- accountability for clinical homework</li> <li>- inquiring staff and peers</li> <li>- critical thinking</li> </ul> |

1  
2  
3  
4  
5  
6  
7  
8  
9  
10  
11  
12  
13  
14  
15  
16  
17  
18  
19  
20  
21  
22  
23  
24  
25  
26  
27  
28  
29  
30  
31  
32  
33  
34  
35  
36  
37  
38  
39  
40  
41  
42  
43  
44  
45  
46

|                                              |                                                                                                        |                                                                                                                                                                                                                                                                                           |                                                                                     |                                                                                                                                        |                                                                                                                                                                                                                                                                   |                                                                                                                                                                                                                                    |
|----------------------------------------------|--------------------------------------------------------------------------------------------------------|-------------------------------------------------------------------------------------------------------------------------------------------------------------------------------------------------------------------------------------------------------------------------------------------|-------------------------------------------------------------------------------------|----------------------------------------------------------------------------------------------------------------------------------------|-------------------------------------------------------------------------------------------------------------------------------------------------------------------------------------------------------------------------------------------------------------------|------------------------------------------------------------------------------------------------------------------------------------------------------------------------------------------------------------------------------------|
|                                              |                                                                                                        |                                                                                                                                                                                                                                                                                           |                                                                                     |                                                                                                                                        |                                                                                                                                                                                                                                                                   | - monitoring, critiquing, avoiding unsafe practice                                                                                                                                                                                 |
| <b>Burnard (1992b)</b>                       | Clinical experiences                                                                                   | Experiential learning <i>'experiential learning' has been used to describe many different sorts of educational approaches ranging from the use of interactive group strategies) to accrediting people for their life experience when considering those people for entrance to courses</i> | No theoretical framework, used, reference to Kolb's stages of experiential learning | In depth interviews about how students perceive experiential learning                                                                  | Definitions of experiential learning:<br>a. something more than just being taught<br>b. something that you use when you use your own experience<br>c learning in the clinical setting                                                                             | - just doing<br>- just being there<br>- learning by seeing<br>- selecting one of the nurses as a role model<br>- being personally involved and immersed in the learning situation                                                  |
| <b>Burnard (1992a)</b>                       | Clinical experiences                                                                                   | Experiential learning<br><br>No definition provided with justification: <i>'it appears that the term can be used by different people in different ways'</i>                                                                                                                               | No theoretical framework, used, reference to Kolb's stages of experiential learning | Interviews about how students and tutors experience experiential learning and questionnaire about perceptions of experiential learning | Experiential learning<br>1. is learning by doing<br>2. is personal learning<br>3. involves reflection<br>Students mostly relate experiential learning to learning in the clinical setting.                                                                        | - learning by taking part<br>- not only doing but also reflecting.<br>- observing role models                                                                                                                                      |
| <b>Carey, Chick, Kent, and Latour (2018)</b> | Learning in clinical settings/ learning within the clinical practice environment;<br>Clinical learning | Peer assisted learning<br><br><i>in which students acquire skills and knowledge through the active help provided by status equals or matched</i>                                                                                                                                          | -                                                                                   | Observation of interaction patterns between students                                                                                   | Three themes contributing to impact of peer assisted learning:<br>- peers as facilitators to develop learning<br>- working together as peers to develop clinical practice and deliver care<br>- positive support and interaction from peers to enhance networking | - watching demonstrations by other students<br>- asking questions<br>- seeking advice and guidance<br>- discussing development plans<br>- discussing practice standards<br>- challenging each other's knowledge<br>- Sharing roles |

|                                              |                       |                                       |                                                                                  |                                                                                                                                                                            |                                                                                                                                                                                                                                                                                                                                                                                                                                                                                                                                       |                                                                                                                                                                                                                                                                                                                                                                                                                                                                                                                                                                                                                                                                                                                                                            |
|----------------------------------------------|-----------------------|---------------------------------------|----------------------------------------------------------------------------------|----------------------------------------------------------------------------------------------------------------------------------------------------------------------------|---------------------------------------------------------------------------------------------------------------------------------------------------------------------------------------------------------------------------------------------------------------------------------------------------------------------------------------------------------------------------------------------------------------------------------------------------------------------------------------------------------------------------------------|------------------------------------------------------------------------------------------------------------------------------------------------------------------------------------------------------------------------------------------------------------------------------------------------------------------------------------------------------------------------------------------------------------------------------------------------------------------------------------------------------------------------------------------------------------------------------------------------------------------------------------------------------------------------------------------------------------------------------------------------------------|
|                                              |                       | <i>companions</i><br>(Topping, 2005). |                                                                                  |                                                                                                                                                                            | and develop working structure.                                                                                                                                                                                                                                                                                                                                                                                                                                                                                                        | <ul style="list-style-type: none"> <li>- sharing experiences of clinical practice</li> <li>- discussing challenges of finding one's way in the clinical environment</li> </ul>                                                                                                                                                                                                                                                                                                                                                                                                                                                                                                                                                                             |
| <b>Dadgaran, Parvizy, and Peyrovi (2012)</b> | Clinical learning     | Clinical learning                     | -                                                                                | semi-structured interviews about how students experience their clinical learning; subsequent observations of students in the clinical setting with a focus on interactions | <p>Five categories and one 'core variable':</p> <ol style="list-style-type: none"> <li>1. facing unfavourable clinical facts</li> <li>2. analysis of a clinical situation and appropriate decision making</li> <li>3. bridging the gap between practice and theory</li> <li>4. struggle for clinical independence</li> <li>5. Dynamism</li> <li>6. struggle to acquire clinical competence</li> </ol> <p>Two approaches to learning:</p> <ol style="list-style-type: none"> <li>1. Microlearning</li> <li>2. Macrolearning</li> </ol> | <ul style="list-style-type: none"> <li>- trying to figure out what regulations are and what they should be through detection of the environment</li> <li>- modify learning deficits to fight the feeling of being unable to answer questions</li> <li>- try to analyse the situation and make an appropriate decision</li> <li>- increase theoretical knowledge through reading books and asking questions</li> <li>- in the ward, review already learned materials (reconstructive thinking)</li> <li>- analysis of clinical issues (clinical reasoning)</li> <li>- making links between theory and practice</li> <li>- design care plans</li> <li>- organizing care on the basis of self-made care plans</li> <li>- doing tasks independently</li> </ul> |
| <b>Gidman (2013)</b>                         | Learning in practice, | Learning from patient stories         | No theoretical framework, used, reference to Eraut's theory on informal learning | Conversational interviews about students' perceptions of their learning experiences of listening to patient stories.                                                       | <ol style="list-style-type: none"> <li>1. Students value listening to stories for learning</li> <li>2. students develop relationships with patients</li> <li>3. students learn from the subjective and emotional perspective of patients</li> <li>4. students think back to their own personal stories when caring for</li> </ol>                                                                                                                                                                                                     | <ul style="list-style-type: none"> <li>- listening to patients' personal stories</li> <li>- building relationships with patient</li> <li>- listening to relatives of a patient</li> <li>- reflecting on personal experiences</li> </ul>                                                                                                                                                                                                                                                                                                                                                                                                                                                                                                                    |

1  
2  
3  
4  
5  
6  
7  
8  
9  
10  
11  
12  
13  
14  
15  
16  
17  
18  
19  
20  
21  
22  
23  
24  
25  
26  
27  
28  
29  
30  
31  
32  
33  
34  
35  
36  
37  
38  
39  
40  
41  
42  
43  
44  
45  
46

|                                  |                                              |                                    |                                 |                                                                                    |                                                                                                                                                                                                                                                                                                                                                                                            |                                                                                                                                                                                                                                                                                                                                                                                                                                                                                                                                                                                                                                                                                                                                                                                                                                                                                                                                                                              |
|----------------------------------|----------------------------------------------|------------------------------------|---------------------------------|------------------------------------------------------------------------------------|--------------------------------------------------------------------------------------------------------------------------------------------------------------------------------------------------------------------------------------------------------------------------------------------------------------------------------------------------------------------------------------------|------------------------------------------------------------------------------------------------------------------------------------------------------------------------------------------------------------------------------------------------------------------------------------------------------------------------------------------------------------------------------------------------------------------------------------------------------------------------------------------------------------------------------------------------------------------------------------------------------------------------------------------------------------------------------------------------------------------------------------------------------------------------------------------------------------------------------------------------------------------------------------------------------------------------------------------------------------------------------|
|                                  |                                              |                                    |                                 |                                                                                    | patients<br>5. listening to stories has a positive impact on understanding patients and a commitment to patient care.                                                                                                                                                                                                                                                                      |                                                                                                                                                                                                                                                                                                                                                                                                                                                                                                                                                                                                                                                                                                                                                                                                                                                                                                                                                                              |
| <b>Grealish and Ranse (2009)</b> | learning in the workplace, clinical learning | Learning in the clinical workplace | Community of practice           | Students' written narratives about where they learned while on clinical placement. | Three thematic constructs, called 'learning triggers':<br>a. participation (or observation) of a task or procedure that leads to (takes them into) a complex, dramatic reading of nursing work<br>b. being personally (emotionally) confronted by the work (high challenge)<br>c. meeting nurses who contribute to the development of an image of what the students wants to be as a nurse | <ul style="list-style-type: none"> <li>- being involved in the practical aspects of caring for a patient</li> <li>- shifting focus from the task to the person</li> <li>- talking to patients' relatives</li> <li>- looking at the patient as a person, taking an interest in their needs</li> <li>- engaging in post-operative observations</li> <li>- assisting patients in little things</li> <li>- giving medications</li> <li>- Being personally (emotionally) confronted by the work</li> <li>- experiencing positive and negative emotions</li> <li>- taking responsibility</li> <li>- talking to patients</li> <li>- meeting nurses who contribute to the development as an image</li> <li>- identifying a resident nurse as a role model</li> <li>- receiving feedback from resident nurses</li> <li>- aligning personal practice with what is observed</li> <li>- working independently in a supportive surrounding</li> <li>- witnessing poor practice</li> </ul> |
| <b>Green and Holloway (1996)</b> | Learning in the clinical setting             | experiential learning              | No theoretical framework, used, | Non-directive interviews about students'                                           | 6 themes:<br>a. Students were able to define experiential learning, usually                                                                                                                                                                                                                                                                                                                | <ul style="list-style-type: none"> <li>- working with the client (including the intuitive element)</li> <li>- participating, interacting, shared</li> </ul>                                                                                                                                                                                                                                                                                                                                                                                                                                                                                                                                                                                                                                                                                                                                                                                                                  |



|                    |                     |                                                                                                                                                                                                                        |                                                     |                                                                        |                                                                                                                                                                                                                                                                                                                                                                                                                                                                                                                                                                                                                  |                                                                                                                                                                                                                                                                                                                                                                                                                                                                                                                                                                                      |
|--------------------|---------------------|------------------------------------------------------------------------------------------------------------------------------------------------------------------------------------------------------------------------|-----------------------------------------------------|------------------------------------------------------------------------|------------------------------------------------------------------------------------------------------------------------------------------------------------------------------------------------------------------------------------------------------------------------------------------------------------------------------------------------------------------------------------------------------------------------------------------------------------------------------------------------------------------------------------------------------------------------------------------------------------------|--------------------------------------------------------------------------------------------------------------------------------------------------------------------------------------------------------------------------------------------------------------------------------------------------------------------------------------------------------------------------------------------------------------------------------------------------------------------------------------------------------------------------------------------------------------------------------------|
|                    |                     |                                                                                                                                                                                                                        | reference to Kolb's stages of experiential learning | understanding, experience and interpretation of experiential learning. | encapsulating both classroom and clinical experience. The importance of the experience itself appeared fundamental.<br>b. Role play is identified as the main example of experiential teaching and learning.<br>c. Students were aware of the issues arising from the problematic relationship between theory and practice.<br>d. The importance of reflection as a stage in experiential learning and of reflective practice was highlighted indicating diversity in application.<br>e. Concerns regarding clinical practice.<br>f. The importance of clinical supervision viewing it as experiential learning. | <ul style="list-style-type: none"> <li>- learning with peers.</li> <li>- evaluating nursing models</li> <li>- reflecting.</li> <li>- sharing experiences.</li> <li>- selecting from previous experience to contribute to new ones</li> <li>- practicing of skills</li> <li>- practicing with people.</li> <li>- patient care</li> <li>- non-threatening supportive collaboration with a colleague</li> <li>- learning form practice and reflection</li> <li>- involving clients</li> <li>- reflecting in the form of a portfolio</li> <li>- maintaining personal journals</li> </ul> |
| <b>Kear (2009)</b> | Clinical experience | transformative learning<br><i>The process of critically reflecting upon previous assumptions or understandings in order to determine whether one still holds them to be true or challenges their claims (Mezirow).</i> | Transformative learning                             | Students' stories about how they experienced their learning            | Upon analysis of the narrative data, five threads emerged from the interviews with the participants.<br>1) Stories of the multi-faceted process of learning<br>2) Stories of experiential learning<br>3) Stories of human interactions as central to defining nursing and caring<br>4) Stories that intertwine personal life experiences and nursing<br>5) Stories of transformative learning                                                                                                                                                                                                                    | <ul style="list-style-type: none"> <li>- creating a connection between clinical experience and classroom material</li> <li>- utilizing peers</li> <li>- learning how to do things</li> <li>- meeting patients with their own stories</li> <li>- looking things up in one's books</li> <li>- providing end-of-life care</li> <li>- caring for a paediatric cancer patient and seeing graduate nurses let her do it in her own way</li> <li>- learning to understand the needs of patients that are unable to communicate</li> <li>- observing other nurses to</li> </ul>              |

1  
2  
3  
4  
5  
6  
7  
8  
9  
10  
11  
12  
13  
14  
15  
16  
17  
18  
19  
20  
21  
22  
23  
24  
25  
26  
27  
28  
29  
30  
31  
32  
33  
34  
35  
36  
37  
38  
39  
40  
41  
42  
43  
44  
45  
46

1  
2  
3  
4  
5  
6  
7  
8  
9  
10  
11  
12  
13  
14  
15  
16  
17  
18  
19  
20  
21  
22  
23  
24  
25  
26  
27  
28  
29  
30  
31  
32  
33  
34  
35  
36  
37  
38  
39  
40  
41  
42  
43  
44  
45  
46

|                               |                                                                                                                                                          |                                                                                                                                                                        |                                          |                                                                                      |                                                                                                                                                                                                                                                                                                                                                                                                                                                                             |                                                                                                                                                                                                                                                                                                                                                                                                                                                                                                                          |
|-------------------------------|----------------------------------------------------------------------------------------------------------------------------------------------------------|------------------------------------------------------------------------------------------------------------------------------------------------------------------------|------------------------------------------|--------------------------------------------------------------------------------------|-----------------------------------------------------------------------------------------------------------------------------------------------------------------------------------------------------------------------------------------------------------------------------------------------------------------------------------------------------------------------------------------------------------------------------------------------------------------------------|--------------------------------------------------------------------------------------------------------------------------------------------------------------------------------------------------------------------------------------------------------------------------------------------------------------------------------------------------------------------------------------------------------------------------------------------------------------------------------------------------------------------------|
|                               |                                                                                                                                                          |                                                                                                                                                                        |                                          |                                                                                      |                                                                                                                                                                                                                                                                                                                                                                                                                                                                             | <p>determine what kind of nurse they want to be (both negatively and positively)</p> <ul style="list-style-type: none"> <li>- just spending time with patients</li> <li>- observing patient situations that were unjust or nursing care that was viewed as sub-optimal</li> </ul>                                                                                                                                                                                                                                        |
| <b>Kear (2013)</b>            | Clinical experiences                                                                                                                                     | transformative learning<br><i>Changes in meaning perspectives that have developed over an individual's lifetime based upon their life experiences (Mezirow, 2000).</i> | Transformative learning                  | Students' stories about how they experienced their learning                          | <p>Upon analysis of the narrative data, five threads emerged from the interviews with the participants.</p> <ol style="list-style-type: none"> <li>1) Stories of the multi-faceted process of learning</li> <li>2) Stories of experiential learning</li> <li>3) Stories of human interactions as central to defining nursing and caring</li> <li>4) Stories that intertwine personal life experiences and nursing</li> <li>5) Stories of transformative learning</li> </ol> | <ul style="list-style-type: none"> <li>- creating a connection between clinical experiences and classroom material</li> <li>- Interacting with others in the clinical environment</li> <li>- understanding patients' needs by interacting with them</li> <li>- observing nurses to determine what kind of nurse they want to be providing end-of-life care</li> </ul>                                                                                                                                                    |
| <b>Manninen et al. (2013)</b> | learning process in clinical practice; learning through participation and dialogue; learning in clinical practice; learning at a clinical education ward | Experiences of learning at a clinical ward                                                                                                                             | Authenticity and transformative learning | semi-structured interviews of how students experienced their encounters with others. | <p>Two main themes:</p> <ol style="list-style-type: none"> <li>a. mutual relationship</li> <li>b. belongingness</li> </ol>                                                                                                                                                                                                                                                                                                                                                  | <ul style="list-style-type: none"> <li>- creating a relationship with patients by meeting them independently</li> <li>- listening and communicating with the patient/ adjust communication to the individual patient's capacity and needs</li> <li>- involving the patient in the nursing process by identifying the patient's own resources</li> <li>- Learning from making failures</li> <li>- handling difficult situations and feelings</li> <li>- collaborating with physicians, physiotherapists, other</li> </ul> |

|                                  |                               |                                                                                                                                                                              |                                                                    |                                                                                                                                                                                                                                        |                                                                                                                                                                                                                                                                                                                                                                                                                                                                                                                                                           |                                                                                                                                                                                                                                                                                                                                                                                       |
|----------------------------------|-------------------------------|------------------------------------------------------------------------------------------------------------------------------------------------------------------------------|--------------------------------------------------------------------|----------------------------------------------------------------------------------------------------------------------------------------------------------------------------------------------------------------------------------------|-----------------------------------------------------------------------------------------------------------------------------------------------------------------------------------------------------------------------------------------------------------------------------------------------------------------------------------------------------------------------------------------------------------------------------------------------------------------------------------------------------------------------------------------------------------|---------------------------------------------------------------------------------------------------------------------------------------------------------------------------------------------------------------------------------------------------------------------------------------------------------------------------------------------------------------------------------------|
|                                  |                               |                                                                                                                                                                              |                                                                    |                                                                                                                                                                                                                                        |                                                                                                                                                                                                                                                                                                                                                                                                                                                                                                                                                           | <ul style="list-style-type: none"> <li>professionals and other students working together with other students, discussing patient care, sharing experiences giving support, informing and showing</li> </ul>                                                                                                                                                                           |
| <b>Manninen (2016)</b>           | Learning in clinical practice | Nursing students' learning in relation to encounters with patients, supervisors, peer students and other healthcare professionals.                                           | transformative learning and concepts of authenticity and threshold | Semi-structured interviews and group interviews of students' experience of their learning with a focus on their encounters with others. Observations with follow up interviews about student-patient encounters and about supervision. | The results show that the core of student meaningful learning is the experience of both external and internal authenticity. External authenticity refers to being in a real clinical setting meeting real patients. Internal authenticity is about the feeling of belonging and really contributing to patients' health and well-being.                                                                                                                                                                                                                   | <ul style="list-style-type: none"> <li>creating mutual relationships</li> <li>taking care of patients with extensive needs for nursing interventions.</li> </ul>                                                                                                                                                                                                                      |
| <b>Mayson and Hayward (1997)</b> | Clinical practice experiences | Learning from hidden curriculum <i>Hidden curriculum involves the experience and application of theory and the wider social context relates to the practice development.</i> | hidden curriculum                                                  | semi-structured interviews about clinical areas and persons that have been beneficial for students' learning, as well as descriptions of their learning.                                                                               | <i>Given a lack of a summary of important themes, I extracted these findings myself</i><br><ol style="list-style-type: none"> <li>1. caring relationship is central for nursing; relationships with patients are significant experiences</li> <li>2. Registered nurses and tutors are contributors to students' learning if they include students</li> <li>3. students actively seek positive experiences</li> <li>4. Peers play a significant role in learning</li> <li>5. importance of being part of the ward team, facilitated by the ward</li> </ol> | <ul style="list-style-type: none"> <li>Working in the medical/surgical areas.</li> <li>Talking with/ listening to clients</li> <li>helping/ making a difference for the patient</li> <li>looking at positive role models</li> <li>sitting together with peers/talking to peers about experiences.</li> <li>watching supervisors on nursing skills and communication skills</li> </ul> |

1  
2  
3  
4  
5  
6  
7  
8  
9  
10  
11  
12  
13  
14  
15  
16  
17  
18  
19  
20  
21  
22  
23  
24  
25  
26  
27  
28  
29  
30  
31  
32  
33  
34  
35  
36  
37  
38  
39  
40  
41  
42  
43  
44  
45  
46

|                              |                                                 |                                                                                                                                                                      |                                                                                                                                   |                                                                                                                                       |                                                                                                                                                                                                                       |                                                                                                                                                                                                                                                                                                                                                                                                                                                                                                                                                                                            |
|------------------------------|-------------------------------------------------|----------------------------------------------------------------------------------------------------------------------------------------------------------------------|-----------------------------------------------------------------------------------------------------------------------------------|---------------------------------------------------------------------------------------------------------------------------------------|-----------------------------------------------------------------------------------------------------------------------------------------------------------------------------------------------------------------------|--------------------------------------------------------------------------------------------------------------------------------------------------------------------------------------------------------------------------------------------------------------------------------------------------------------------------------------------------------------------------------------------------------------------------------------------------------------------------------------------------------------------------------------------------------------------------------------------|
|                              |                                                 |                                                                                                                                                                      |                                                                                                                                   |                                                                                                                                       | nurse<br>6. theory-practice gap                                                                                                                                                                                       |                                                                                                                                                                                                                                                                                                                                                                                                                                                                                                                                                                                            |
| <b>Roberts (2008)</b>        | Clinical learning; informal on-the job learning | Peer learning<br><i>Peer learning involves students learning from each other</i>                                                                                     | No theoretical framework, used, reference to Eraut’s theory on informal learning and Melia’s theory of professional socialization | observation of students in clinical practice with a focus on peer interactions                                                        | Themes:<br>a. value placed on friendships and learning in clinical practice.<br>B. students learning survival skills (implicit and explicit rules)<br>c. developing clinical skills                                   | <ul style="list-style-type: none"> <li>- working alongside other students.</li> <li>- passing along implicit rules</li> <li>- making mistakes/ being pulled up/called about them</li> <li>- sharing clinical skills</li> <li>- asking other students for help.</li> <li>- teaching other students, regardless of year of study.</li> </ul>                                                                                                                                                                                                                                                 |
| <b>Seylani et al. (2012)</b> | Clinical experiences                            | Informal learning<br><i>Informal or indirect learning can occur as a function of observing, retaining, and replicating behaviours during educational experiences</i> | -                                                                                                                                 | semi-structured interviews about what changes students experienced during their study apart from theoretical and practical knowledge. | Five categories of students' experiences:<br>a. personal maturity and emotional growth,<br>b. social development<br>c. closeness to God<br>d. alterations in value systems<br>e. ethical and professional commitments | <ul style="list-style-type: none"> <li>- Frequent personal interactions</li> <li>- developing relationships</li> <li>- frequent exposure to life and death situations</li> <li>- interacting with others.</li> <li>- caring for people with different religious beliefs</li> <li>- learning from patients struggling with chronic illness</li> <li>- continuously engaging with people who need help</li> <li>- seeing patients suffer</li> <li>- communicating with patients</li> <li>- caring for the most vulnerable</li> <li>- confronting the light and dark sides of life</li> </ul> |
| <b>Stockhausen (2005)</b>    | learning in the workplace                       | learning in the workplace                                                                                                                                            | No theoretical framework, used, reference to Kolb’s stages of experiential learning                                               | Students' journals and reflective group debriefings comprehending reflections on clinical experiences.                                | Themes<br>a. Entering the world of the patient<br>b. Clinicians making a difference<br>c. Constructing an identity as a nurse                                                                                         | <ul style="list-style-type: none"> <li>- learn through the patient's experience</li> <li>- reacting to and deciphering emotive non-verbal cues from the patient as they care for them.</li> <li>- interacting with the patient</li> <li>- reflectively interpreting experiences with the patient.</li> </ul>                                                                                                                                                                                                                                                                               |

1  
2  
3  
4  
5  
6  
7  
8  
9  
10  
11  
12  
13  
14  
15  
16  
17  
18  
19  
20  
21  
22  
23  
24  
25  
26  
27  
28  
29  
30  
31  
32  
33  
34  
35  
36  
37  
38  
39  
40  
41  
42  
43  
44  
45  
46

|                       |                                                         |                              |  |                                                                                    |                                                                                                                                                 |                                                                                                                                                                                                                                                                                                                                                                                                                                                                                                                                                                                                                                                                                                                                     |
|-----------------------|---------------------------------------------------------|------------------------------|--|------------------------------------------------------------------------------------|-------------------------------------------------------------------------------------------------------------------------------------------------|-------------------------------------------------------------------------------------------------------------------------------------------------------------------------------------------------------------------------------------------------------------------------------------------------------------------------------------------------------------------------------------------------------------------------------------------------------------------------------------------------------------------------------------------------------------------------------------------------------------------------------------------------------------------------------------------------------------------------------------|
|                       |                                                         |                              |  |                                                                                    |                                                                                                                                                 | <ul style="list-style-type: none"> <li>- sharing and developing everyday nursing practices with the RN</li> <li>- constructing their own schemata of admirable qualities the RN displays</li> <li>- picking up little tips from the RN/ little things that she does.</li> <li>- listening to RNs</li> <li>- confirming their nursing practices and assimilating theoretical and clinical knowledge</li> <li>- practicing skills</li> <li>- doing what it is that nurses do</li> <li>- activities such as making a bed or showering a patient when considered from a student's achievement perspective.</li> <li>- Engaging with the activities of nursing</li> <li>- Making comparisons and discriminations of practices</li> </ul> |
| <b>Windsor (1987)</b> | Learning in the contextual setting of clinical practice | clinical learning experience |  | Focused interviews about how nursing students perceive their clinical experiences. | Main categories of learning: nursing skills, time management, professional socialization. A pattern of student development through three phases | <ul style="list-style-type: none"> <li>- practicing nursing skills</li> <li>- going back to books and journals</li> <li>- poring over chart for hours</li> <li>- consulting other health care providers</li> <li>- writing papers</li> <li>- observing nurses and participating in nursing functions</li> <li>- preparing for clinical practice including meeting patients, reading charts, studying patients' health needs, consulting staff.</li> <li>- Caring for lots of different patients with different diseases, different kinds of wards, variety of instructors, working with different equipment.</li> </ul>                                                                                                             |

1  
2  
3  
4  
5  
6  
7  
8  
9  
10  
11  
12  
13  
14  
15  
16  
17  
18  
19  
20  
21  
22  
23  
24  
25  
26  
27  
28  
29  
30  
31  
32  
33  
34  
35  
36  
37  
38  
39  
40  
41  
42  
43  
44  
45  
46

|  |  |  |  |  |  |                                                                                                                                                                                                            |
|--|--|--|--|--|--|------------------------------------------------------------------------------------------------------------------------------------------------------------------------------------------------------------|
|  |  |  |  |  |  | <ul style="list-style-type: none"> <li>- Working more subsequent shifts with the same patient</li> <li>- asking question without feeling embarrassed</li> <li>- asking questions to their peers</li> </ul> |
|--|--|--|--|--|--|------------------------------------------------------------------------------------------------------------------------------------------------------------------------------------------------------------|

Table 2. Main concepts, operationalisations, frameworks, findings, learning activities of the included studies

For peer review only

## Conceptualisations

### *Main concepts*

To analyse how learning in practice was approached we compared the main concepts of study, usually reflected in the aims of the paper. Five of the papers studied a concept that was a synonym for learning in clinical practice such as clinical learning experience or workplace learning<sup>16 26 27 30 31</sup>. However, in none of these studies the concept was defined or justified. The remaining eleven studies examined a specific concept related to learning in general, which was studied within the context of clinical practice. In four of the studies this concept concerned social learning, either in general, or from specific groups that are naturally present in the nursing ward<sup>15 23 25 29</sup>. In five of the studies, the non-conscious, unplanned nature of learning was explicitly targeted by the concepts of experiential, informal, and hidden curriculum learning<sup>19-22 28</sup>. The remaining studies focused on the active role of the student in learning by investigating learning styles<sup>24</sup>, or a specific combination of both the process and effects of learning as reflected in the concept of transformative learning<sup>17 18</sup>.

### *Theoretical frameworks*

The five studies that used a theoretical or conceptual framework to structure the study, used Wenger's community of practice<sup>27</sup> or Mezirow's transformative learning<sup>15-18</sup>. Three of the studies tried to extend on existing theories using a grounded theory approach<sup>19 20 26</sup>. The remaining nine studies discussed their research questions and findings in the light of previous literature relevant for their specific study<sup>21 22 30 31</sup>, some of them referring to theories about learning such as Eraut's theory of informal learning, Melia's theory of professional socialization<sup>29</sup>, or Kolb's learning cycle<sup>19-21 24 30</sup>.

## Operationalisations

Nine studies used interviews, narratives or both to address students experiences of learning in general<sup>17 18 24 26-28</sup> or specifically learning from interactions<sup>15 16 23</sup>. The different approaches shared a semi-structured nature, in which a few main topics were introduced by the researcher, to which students could bring up their ideas and experiences. Some authors<sup>19-21</sup> combined an exploration of what students understood by experiential learning, with an examination of their actual experiences in experiential learning. Finally, in three of the studies, learning was operationalised by the observation of interactions between nursing students and peers or colleagues that play a role in learning<sup>15 25 29</sup>.

## Comparison of conceptualisations and operationalisations

Most of the studies, apart from the ones that focus on social interactions, adopted a very open approach to examine learning in practice, irrespective of the concepts and theoretical frameworks

1  
2  
3 used. This resulted in a variety of overlapping outcomes. Together with the small number of studies,  
4 a thorough comparison of the suitability of different concepts was difficult.  
5  
6

### 7 **Learning activities**

8 The thematic analysis allowed us to extract the following classes of activities that are observed or  
9 reported to contribute to learning during the daily presence of students in the nursing ward.  
10  
11

- 12 a. Working as a nurse
  - 13 b. Interacting with ward staff
  - 14 c. Interacting with peers
  - 15 d. Interacting with patients
  - 16 e. Processing Information
- 17  
18  
19  
20  
21  
22

#### 23 *a. Working as a nurse*

24 Students learn by actively engaging in nursing practice, including gaining responsibility for designing  
25 care plans<sup>26</sup>, organizing care, practicing skills and delivering patient care themselves<sup>17 19-21 24 26 27 30</sup>,  
26 within a supportive environment<sup>27</sup>. Several studies explicitly report how the importance of working  
27 independently evolves throughout training<sup>15 16 26 31</sup>. It should be noted that this theme may overlap  
28 with the other themes, and might reflect a more general characteristic of learning in practice.  
29  
30  
31  
32

#### 33 *b. Interacting with ward staff*

34 Students learn by observing both good and poor examples of registered nurses, listening to them and  
35 choosing which one could serve role model<sup>17-20 22 24 27 28 30 31</sup>. Students learn from other professionals  
36 on the ward, for example by listening to their discussions during rounds<sup>16 24 31</sup> or receiving feedback  
37  
38  
39  
40  
41  
42  
43  
44  
45

#### 46 *c. Interacting with peers*

47 Students learn from peers by working together, questioning each other, sharing experiences,  
48 observing each other at work<sup>17 21 24 25 28</sup>, and teaching each other<sup>29</sup>. They pass on implicit rules by  
49 asking advice and guidance. Through discussing standards in practice, development plans and  
50 practical issues they challenge each other and expand their knowledge<sup>25</sup>. Through dividing the work  
51 between them, students optimise their exposure to different learning situations<sup>25</sup>.  
52  
53  
54  
55  
56  
57

#### 58 *d. Interacting with patients*



1  
2  
3 Listening to patients and building relationships is reported as an activity that students learn from<sup>15-17</sup>  
4 <sup>21 23 27 28</sup>. More specifically, caring for patients who have different religious beliefs, communication  
5 problems, extensive needs, or chronic illnesses or visibly suffer contribute to students' learning<sup>15-17 22</sup>  
6 <sup>24 30</sup> as well as providing end-of-life care<sup>17 18 22</sup>. As concrete activities, involving the patient in the  
7 nursing process was regarded to be valuable<sup>16</sup> as well as assisting them with little things<sup>27</sup>, giving  
8 medication, doing post-operative observations, or performing simple tasks such as making a bed, as  
9 long as they can be done independently<sup>27</sup>.

#### 16 *e. processing information*

17  
18 A final class of activities refers to how students look up, process, and store information related to  
19 patient care and their learning process. Reflecting on nursing practice promotes learning<sup>19-21 24 30</sup>,  
20 sometimes supported by a journal or a portfolio<sup>21</sup>. More specifically, students reflect by analysing  
21 and comparing nursing practice and thinking how to improve it, making connections with theory and  
22 previous experience<sup>17 18 24 26 30</sup>. Negative experiences such as not being able to answer questions,  
23 witnessing poor practice, making mistakes, and emotion evoking encounters, stimulate students to  
24 reflect and expand their knowledge and skills<sup>16 17 22 27 29</sup>. Students benefit from going through  
25 textbooks<sup>17 26 31</sup> and patient charts<sup>24 31</sup>, as a preparation for the shift for activities such as patient  
26 education.

### 35 Summary of results

36 Figure 2 summarises the findings regarding conceptualisations, operationalisations and learning  
37 activities.

### 40 Expert consultation

41 All four experts acknowledged the synthesised learning activities as the core of clinical training. One  
42 of them added a nuance that some activities automatically promote learning ('learning by doing'),  
43 while others require support by staff (e.g. 'peer learning'). Moreover, one of them noted that  
44 experiences may only result in learning after the learning has been made conscious. Compared to  
45 their ideal vision of practice learning, another expert missed the active role of the student in creating  
46 learning opportunities, as well as formalised elements of learning, such as the formulation of learning  
47 goals and the elaboration of theory learned in school. However, this was something they missed in  
48 their own daily practice as well. Finally, two experts noted that the 'supervisor' role of the resident  
49 nurse was referred to minimally; it appeared that resident nurses were primarily observed as role  
50 models. Two of the experts were surprised by the notion that negative experiences are repeatedly  
51 mentioned as learning opportunities.

1  
2  
3  
4  
5  
6  
7  
8  
9  
10  
11  
12  
13  
14  
15  
16  
17  
18  
19  
20  
21  
22  
23  
24  
25  
26  
27  
28  
29  
30  
31  
32  
33  
34  
35  
36  
37  
38  
39  
40  
41  
42  
43  
44  
45  
46  
47  
48  
49  
50  
51  
52  
53  
54  
55  
56  
57  
58  
59  
60

For peer review only

## DISCUSSION

The study aimed to examine how different concepts equivalent to “learning in practice” are used and operationalised and which learning activities are reported in the nursing education literature. The final aim was to propose a terminology to guide future studies. . Five of the 17 reviewed studies adopted a general, yet unexplained, synonym for learning in practice as their object of study, the others approached learning in practice focusing on the social, unplanned, and active nature of learning. These foci are in line with the broader literature on practice learning in healthcare education<sup>33,32</sup>. Regardless of conceptualisations, all studies adopted a qualitative approach, resulting in various, yet overlapping themes. A closer examination of learning activities that were reported throughout the results, revealed six classes of activities.

Our eventual aim was to make suggestions about the use of terminology in future research. The small number and poor to medium quality of the studies hindered a thorough comparison between concepts. There were often missing links in the alignment between concepts, study aims, operationalisations and conclusions, resulting in a variety of results that were often difficult to relate to their original study question. Moreover, the sparse use of theoretical frameworks hindered an aggregation of findings<sup>33</sup>. As different learning theories will remain to exist, the use of different concepts might be inevitable<sup>32</sup>. However, we recommend that future studies in this field explain and justify the concepts they use based on previous literature, and critically evaluate findings in the light of the premises of these concepts. In addition to justifying these choices, the literature could benefit if authors compare the assumptions of the concepts they use to frameworks that aggregate characteristics of workplace learning based on previous literature in diverse fields<sup>34</sup>. Alternatively, a further exploration of the meaning of a concept itself can advance the field. However, we suggest that the exploration of the meaning of a concept and participants’ experiences with the same concept are clearly separated within studies, as in studies where the two were mixed, it was not always clear whether participants’ experiences related to the same phenomenon.<sup>19-21</sup>.

Not surprisingly, the informal or hidden nature of clinical learning was frequently referred to. As this learning occurs partly unconsciously, it is a challenging subject to define and to study<sup>35</sup>. In the reviewed studies, informal learning was addressed by what it is *not* (i.e. theoretical and practical knowledge)<sup>22</sup>, and hidden curriculum was described by learning resources that were *not* reported by participants<sup>36</sup>. Formal or formalised activities in the clinical area (such as peer teaching and doing ‘clinical homework’), were not labelled as such. As both formal and informal learning coexist in the practice setting<sup>37</sup> and the dichotomy between the two has been questioned<sup>38</sup>, clear definitions of

1  
2  
3 these concepts are required, with which the different activities that student engage in throughout  
4 the day can be classified.  
5

6  
7 In most of the studies, potential or desirable learning outcomes were not articulated, and were not  
8 separated from outcomes such as professional identity formation or wellbeing. Studies that did  
9 include the intended effect of learning in their definitions, as those of Kear<sup>17 18</sup>, did not critically  
10 revisit if these outcomes were indeed reported. Investigation of the relationship between learning  
11 and subsequent outcomes can be found in literature addressing particular outcomes (such as skills  
12 learning)<sup>39</sup> or about assessment<sup>40</sup>. These fell outside the scope of our review. Moreover, the lack of  
13 predefined outcomes might be a characteristic of clinical learning<sup>41</sup>. However, also in literature  
14 addressing complex learning processes such a clinical learning, a critical discussion of actual and  
15 desirable outcomes with reference to the body of literature on this topic, is warranted.  
16  
17

18  
19 The analysis of learning activities is congruent with literature on the importance of increasing  
20 independence<sup>42</sup>, interaction with others<sup>43</sup>, learning from authentic situations with patients<sup>44</sup>, and  
21 reflection<sup>45</sup> as well as with experiences from our expert panel. In the reviewed studies, the  
22 interactions between concrete behaviours and cognitive processing were not systematically  
23 addressed, which resulted in separate categories in our analysis. According to constructivist learning  
24 theories and as was commented by our experts, the social, behavioural and cognitive domains of  
25 learning go hand in hand<sup>46</sup>. Some of the study results did reveal this interaction, such as students  
26 reflecting on how they turned negative experiences into learning. Systematically acknowledging  
27 interactions between behaviour and cognition, in the terminology as well as in the methods, will  
28 contribute to our understanding of how and when individual students learn. Caution has to be taken  
29 though in labels such as 'learning styles' as one of the studies<sup>24</sup> did, in the absence of an accurate test  
30 of the premise of this interpretation. Finally, the appreciation of the learning potential of more  
31 negative experiences, calls for a closer examination of students' strategies to turn clinical situations  
32 into learning.  
33  
34

35  
36 In this review, clinical learning has been studied from the viewpoint of the student as a learner, as  
37 opposed to the perspective of external factors affecting students' learning. However, as both this  
38 review and previous literature have demonstrated<sup>2</sup>, learning is a social process that is highly  
39 dependent on the environment. If students feel supported by the team they will be more willing to  
40 take responsibility and actively create learning opportunities<sup>47 48</sup>. The current work adds to our  
41 understanding of the student's role within the complex structure of clinical nursing education and  
42 can be a starting point for future research on how individual interactions between students and their  
43 environment promote learning.  
44  
45  
46  
47  
48  
49  
50  
51  
52  
53  
54  
55  
56  
57  
58  
59  
60

## Limitations

The variety of concepts, processes, definitions and outcomes associated with learning in clinical practice proved challenging in determining the boundaries of our search. The selection was influenced by choice of terminology and framing of the authors of the studies. This review therefore provides insight into the current use of terminology as well as caveats in applying it. Limiting to nursing in the hospital setting excluded us from both theoretical and experimental research on practice learning in other health professions. However, this focus enabled us to synthesise specific findings from the different studies. The approach can be of interest for other health professions, and will eventually allow for comparison of the literature. Finally, our synthesis of learning activities is based on studies with heterogeneity in populations, setting, and year of publication, in which the same type of activity might have a different meaning. As we reinterpreted some of the data caution has to be taken in drawing firm conclusions<sup>49</sup>. Nevertheless, as the findings were recognised by experts and correspond with existing literature, the categories found are a good starting point for further study.

## Conclusion

This review provides an overview of how learning in clinical practice has been addressed in the undergraduate nursing education literature. The number of studies that investigate examine how students learn during their days at the ward remains scarce and the quality of studies conducted is circumspect. Moreover, these studies often fail to align theoretical concepts with a corresponding operationalization and analysis of findings, therefore offering little guidance for which terminology to use in future studies. The studies on this topic reveal the importance of increased autonomy, learning form, peers, professionals and patients, and the cognitive appraisal of learning. This categorization may be a basis for the design and evaluation of clinical learning. There is still uncertainty about formal and informal components of learning and how they should be studied, as well as about desirable outcomes of clinical learning and how to incorporate them in research. Given the importance of students' active engagement with learning as well as reflection on it, behavioural and cognitive aspects of learning as well as their interactions should be explicitly addressed.

## REFERENCES

1. Cope P, Cuthbertson P, Stoddart B. Situated learning in the practice placement. *J Adv Nurs* 2000;31(4):850-56.
2. Flott EA, Linden L. The clinical learning environment in nursing education: a concept analysis. *J Adv Nurs* 2016;72(3):501-13. doi: 10.1111/jan.12861

3. Manley K, Titchen A, Hardy S. Work-based learning in the context of contemporary health care education and practice: A concept analysis. *Pract Dev Health Care* 2009;8(2):87-127. doi: 10.1002/pdh.284
4. Bisholt B, Ohlsson U, Engstrom AK, et al. Nursing students' assessment of the learning environment in different clinical settings. *Nurse education in practice* 2014;14(3):304-10. doi: 10.1016/j.nepr.2013.11.005 [published Online First: 2013/12/21]
5. Davis K, Drey N, Gould D. What are scoping studies? A review of the nursing literature. *Int J Nurs Stud* 2009;46(10):1386-400. doi: 10.1016/j.ijnurstu.2009.02.010
6. Daudt HM, van Mossel C, Scott SJ. Enhancing the scoping study methodology: a large, inter-professional team's experience with Arksey and O'Malley's framework. *BMC Med Res Methodol* 2013;13(1):48.
7. Arksey H, O'Malley L. Scoping studies: towards a methodological framework. *International Journal of Social Research Methodology* 2005;8(1):19-32. doi: 10.1080/1364557032000119616
8. Levac D, Colquhoun H, O'Brien KK. Scoping studies: advancing the methodology. *Implementation science* 2010;5(1):69.
9. Peters M, Godfrey C, Mclnerney P, et al. Chapter 11: Scoping Reviews. In: E A, Z M, eds. Joanna Briggs Institute Reviewer's Manual: The Joanna Briggs Institute 2017.
10. Tricco AC, Lillie E, Zarin W, et al. PRISMA extension for scoping reviews (PRISMA-ScR): checklist and explanation. *Ann Intern Med* 2018;169(7):467-73.
11. Stoffels M, Peerdeman SM, Daelmans HE, et al. Protocol for a scoping review on the conceptualisation of learning in undergraduate clinical nursing practice. *BMJ open* 2019;9(2):bmjopen-2018-024360.
12. Buckley S, Coleman J, Davison I, et al. The educational effects of portfolios on undergraduate student learning: a Best Evidence Medical Education (BEME) systematic review. BEME Guide No. 11. *Med Teach* 2009;31(4):282-98.
13. McGowan J, Sampson M, Salzwedel DM, et al. PRESS Peer Review of Electronic Search Strategies: 2015 Guideline Statement. *J Clin Epidemiol* 2016;75:40-6. doi: 10.1016/j.jclinepi.2016.01.021
14. Critical Appraisal Skills Programme. CASP Qualitative Checklist 2018 [Available from: <https://casp-uk.net/casp-tools-checklists/> accessed august 2018.
15. Manninen K. Experiencing authenticity - the core of student learning in clinical practice. *Perspectives on medical education* 2016;5(5):308-11. doi: 10.1007/s40037-016-0294-0 [published Online First: 2016/09/18]
16. Manninen K, Henriksson EW, Scheja M, et al. Authenticity in Learning--Nursing Students' Experiences at a Clinical Education Ward. *Health Education* 2013;113(2):132-43.
17. Kear TM. An investigation of transformative learning experiences during associate degree nursing education using narrative methods. 2009;Ph.D.:141 p-41 p.
18. Kear TM. Transformative learning during nursing education: A model of interconnectivity. *Nurse education today* 2013;33(9):1083-87.
19. Burnard P. Student nurses' perceptions of experiential learning. *Nurse Educ Today* 1992;12(3):163-73. [published Online First: 1992/06/01]
20. Burnard P. Learning from experience: nurse tutors' and student nurses' perceptions of experiential learning in nurse education: some initial findings. *Int J Nurs Stud* 1992;29(2):151-61. [published Online First: 1992/05/01]
21. Green AJ, Holloway DG. Student Nurses' Experience of Experiential Teaching and Learning: Towards a Phenomenological Understanding. 1996;48:69-84.
22. Seylani K, Negarandeh R, Mohammadi E. Iranian undergraduate nursing student perceptions of informal learning: A qualitative research. *Iran J Nurs Midwifery Res* 2012;17(7):493-500.
23. Gidman J. Listening to stories: valuing knowledge from patient experience. *Nurse education in practice* 2013;13(3):192-6. doi: 10.1016/j.nepr.2012.09.006 [published Online First: 2012/10/23]

- 1
  - 2
  - 3
  - 4
  - 5
  - 6
  - 7
  - 8
  - 9
  - 10
  - 11
  - 12
  - 13
  - 14
  - 15
  - 16
  - 17
  - 18
  - 19
  - 20
  - 21
  - 22
  - 23
  - 24
  - 25
  - 26
  - 27
  - 28
  - 29
  - 30
  - 31
  - 32
  - 33
  - 34
  - 35
  - 36
  - 37
  - 38
  - 39
  - 40
  - 41
  - 42
  - 43
  - 44
  - 45
  - 46
  - 47
  - 48
  - 49
  - 50
  - 51
  - 52
  - 53
  - 54
  - 55
  - 56
  - 57
  - 58
  - 59
  - 60
24. Baraz S, Memarian R, Vanaki Z. The diversity of Iranian nursing students' clinical learning styles: a qualitative study. *Nurse education in practice* 2014;14(5):525-31. doi: 10.1016/j.nepr.2014.03.004 [published Online First: 2014/04/16]
25. Carey MC, Chick A, Kent B, et al. An exploration of peer-assisted learning in undergraduate nursing students in paediatric clinical settings: An ethnographic study. *Nurse Educ Today* 2018;65:212-17. doi: 10.1016/j.nedt.2018.03.014
26. Dadgaran SA, Parvizy S, Peyrovi H. Passing through a rocky way to reach the pick of clinical competency: A grounded theory study on nursing students' clinical learning. *Iranian journal of nursing and midwifery research* 2012;17(5):330-7. [published Online First: 2013/07/16]
27. Grealish L, Ranse K. An exploratory study of first year nursing students' learning in the clinical workplace. *Contemp Nurse* 2009;33(1):80-92.
28. Mayson J, Hayward W. Learning to be a nurse. The contribution of the hidden curriculum in the clinical setting. *Nursing praxis in New Zealand inc* 1997;12(2):16-22. [published Online First: 1997/07/01]
29. Roberts D. Learning in clinical practice: the importance of peers. *Nursing standard (Royal College of Nursing (Great Britain) : 1987)* 2008;23(12):35-41. doi: 10.7748/ns2008.11.23.12.35.c6727 [published Online First: 2008/12/20]
30. Stockhausen LJ. Learning to become a nurse: students' reflections on their clinical experiences. *The Australian journal of advanced nursing : a quarterly publication of the Royal Australian Nursing Federation* 2005;22(3):8-14. [published Online First: 2006/02/28]
31. Windsor A. Nursing students' perceptions of clinical experience. *The Journal of nursing education* 1987;26(4):150-4. [published Online First: 1987/04/01]
32. Yardley S, Teunissen PW, Dornan T. Experiential learning: AMEE Guide No. 63. *Med Teach* 2012;34(2):e102-15. doi: 10.3109/0142159X.2012.650741
33. Prideaux D, Bligh J. Research in medical education: asking the right questions. *Medical education* 2002;36(12):1114-15.
34. Tynjälä P. Perspectives into learning at the workplace. *Educ Res Rev* 2008;3(2):130-54. doi: 10.1016/j.edurev.2007.12.001
35. Lawrence C, Mhlaba T, Stewart KA, et al. The Hidden Curricula of Medical Education: A Scoping Review. *Acad Med* 2017 doi: 10.1097/ACM.0000000000002004
36. Mayson J, Hayward W. Learning to be a nurse. The contribution of the hidden curriculum in the clinical setting. *Nursing praxis in New Zealand inc* 1997;12(2):16-22.
37. Janssens L, Smet K, Onghena P, et al. The relationship between learning conditions in the workplace and informal learning outcomes: a study among police inspectors. *Int J Train Dev* 2016
38. Billett S. Critiquing workplace learning discourses: Participation and continuity at work. *Studies in the Education of Adults* 2002;34(1):56-67.
39. Coyle-Rogers P, Putman C. Using experiential learning: facilitating hands-on basic patient skills. *J Nurs Educ* 2006;45(4):142-3. [published Online First: 2006/04/25]
40. Price B. Key principles in assessing students' practice-based learning. *Nurs Stand* 2012;26(49):49-55; quiz 56. doi: 10.7748/ns2012.08.26.49.49.c9236 [published Online First: 2012/08/31]
41. Wilkinson TJ. Kolb, integration and the messiness of workplace learning. *Perspectives on Medical Education* 2017:1-2.
42. Levett-Jones T, Lathlean J, Higgins I, et al. Staff-student relationships and their impact on nursing students' belongingness and learning. *J Adv Nurs* 2009;65(2):316-24.
43. Egan T, Jaye C. Communities of clinical practice: the social organization of clinical learning. *Health*: 2009;13(1):107-25.
44. Liljedahl M, Boman LE, Falt CP, et al. What students really learn: contrasting medical and nursing students' experiences of the clinical learning environment. *Adv Health Sci Educ Theory Pract* 2015;20(3):765-79. doi: 10.1007/s10459-014-9564-y
45. Mann K, Gordon J, MacLeod A. Reflection and reflective practice in health professions education: a systematic review. *Advances in health sciences education* 2009;14(4):595.

- 1  
2  
3 46. Cleland J, Durning SJ. *Researching Medical Education*: John Wiley & Sons 2015.
- 4 47. Levett-Jones T, Lathlean J. Belongingness: a prerequisite for nursing students' clinical learning.  
5 *Nurse Educ Pract* 2008;8(2):103-11. doi: 10.1016/j.nepr.2007.04.003
- 6 48. Newton JM, Henderson A, Jolly B, et al. A contemporary examination of workplace learning  
7 culture: an ethn methodology study. *Nurse Educ Today* 2015;35(1):91-6. doi:  
8 10.1016/j.nedt.2014.07.001 [published Online First: 2014/07/30]
- 9 49. Ruggiano N, Perry TE. Conducting secondary analysis of qualitative data: Should we, can we, and  
10 how? *Qualitative Social Work: Research and Practice* 2017:147332501770070. doi:  
11 10.1177/1473325017700701  
12  
13

## 14 FUNDING

15  
16 This research received no specific grant from any funding agency in the public, commercial or not-  
17 for-profit sectors.  
18  
19

## 20 COMPETING INTERESTS

21  
22 The authors declare that they have no competing interests.  
23  
24

## 25 CONTRIBUTORS

26 MS, RAK, HED, SP, JCFK contributed to the research idea and study design and edited and revised the  
27 paper. MS and JCFK developed the search strategy and executed the search. MS and RAK identified  
28 and agreed eligible papers and extracted the data. MS wrote the manuscript. RAK led the supervision  
29 of the project.  
30  
31  
32  
33

## 34 PATIENT CONSENT

35  
36 Not required.  
37  
38  
39

## 40 DATA SHARING STATEMENT

41  
42 The datasets generated during and/or analysed during the current study are available from the  
43 corresponding author on reasonable request.  
44  
45

## 46 FIGURES

47  
48 Figure 1. Flow diagram article screening and selection search step 2  
49  
50  
51  
52  
53  
54  
55  
56  
57  
58  
59  
60



1  
2  
3  
4  
5  
6  
7  
8  
9  
10  
11  
12  
13  
14  
15  
16  
17  
18  
19  
20  
21  
22  
23  
24  
25  
26  
27  
28  
29  
30  
31  
32  
33  
34  
35  
36  
37  
38  
39  
40  
41

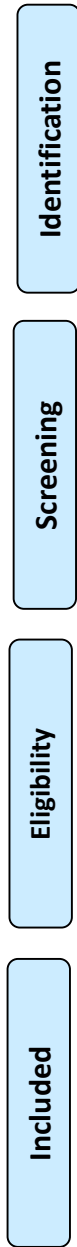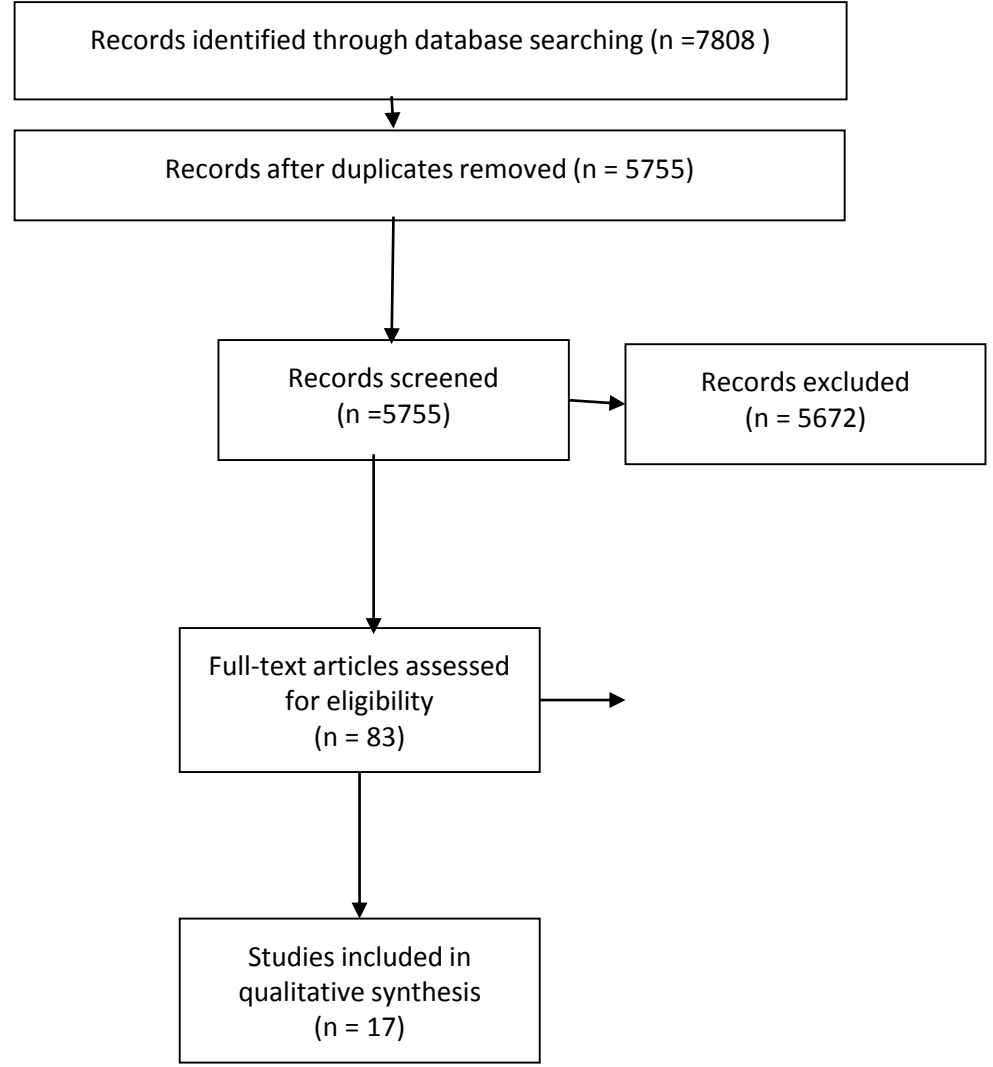

## LEARNING ACTIVITIES

|                    |                             |                        |                           |                        |
|--------------------|-----------------------------|------------------------|---------------------------|------------------------|
| Working as a nurse | Interacting with ward staff | Interacting with peers | Interacting with patients | Processing information |
|--------------------|-----------------------------|------------------------|---------------------------|------------------------|

## OPERATIONALISATIONS

|                                                                          |                                                                                                |                                                  |                                                                |
|--------------------------------------------------------------------------|------------------------------------------------------------------------------------------------|--------------------------------------------------|----------------------------------------------------------------|
| Interviews/narratives of students' experiences with learning in practice | Interviews/narratives of students' experiences of learning in practice focused on interactions | Observation of interactions involved in learning | Interviews about students' understanding of a specific concept |
|--------------------------------------------------------------------------|------------------------------------------------------------------------------------------------|--------------------------------------------------|----------------------------------------------------------------|

## CONCEPTUALISATIONS

| Concepts synonym for practice learning                                                                                                                                                                                                                                                                                                                                        | Concepts concerning social learning                                                                                                                                                                                                | Concepts appreciating the conscious, unplanned nature of clinical learning                                                                                                 | Concepts appreciating the active role of students                                                                                            |
|-------------------------------------------------------------------------------------------------------------------------------------------------------------------------------------------------------------------------------------------------------------------------------------------------------------------------------------------------------------------------------|------------------------------------------------------------------------------------------------------------------------------------------------------------------------------------------------------------------------------------|----------------------------------------------------------------------------------------------------------------------------------------------------------------------------|----------------------------------------------------------------------------------------------------------------------------------------------|
| <ul style="list-style-type: none"> <li>• <i>Clinical learning experience</i></li> <li>• <i>Workplace learning</i></li> <li>• <i>Informal on the job learning</i></li> <li>• <i>Clinical learning</i></li> <li>• <i>Learning in the clinical workplace</i></li> <li>• <i>Experiences of learning at a clinical ward</i></li> <li>• <i>Learning in the workplace</i></li> </ul> | <ul style="list-style-type: none"> <li>• <i>Peer learning</i></li> <li>• <i>Peer assisted learning</i></li> <li>• <i>Learning from patient stories</i></li> <li>• <i>Learning in relation to encounters with others</i></li> </ul> | <ul style="list-style-type: none"> <li>• <i>Experiential learning</i></li> <li>• <i>Informal learning</i></li> <li>• <i>Learning from the hidden curriculum</i></li> </ul> | <ul style="list-style-type: none"> <li>• <i>Learning styles in the clinical setting</i></li> <li>• <i>Transformative learning</i></li> </ul> |

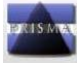

## PRISMA-ScR Checklist

| Section/topic                                        | #  | Checklist item                                                                                                                                                                                                                                                                                                    | Reported on page #       |
|------------------------------------------------------|----|-------------------------------------------------------------------------------------------------------------------------------------------------------------------------------------------------------------------------------------------------------------------------------------------------------------------|--------------------------|
| <b>TITLE</b>                                         |    |                                                                                                                                                                                                                                                                                                                   |                          |
| Title                                                | 1  | Identify the report as a scoping review.                                                                                                                                                                                                                                                                          | 1                        |
| <b>ABSTRACT</b>                                      |    |                                                                                                                                                                                                                                                                                                                   |                          |
| Structured summary                                   | 2  | Provide a structured summary that includes (as applicable) background, objectives, eligibility criteria, sources of evidence, charting methods, results, and conclusions that relate to the review questions and objectives.                                                                                      | 2                        |
| <b>INTRODUCTION</b>                                  |    |                                                                                                                                                                                                                                                                                                                   |                          |
| Rationale                                            | 3  | Describe the rationale for the review in the context of what is already known. Explain why the review questions or objectives lend themselves to a scoping review approach.                                                                                                                                       | 3                        |
| Objectives                                           | 4  | Provide an explicit statement of the questions and objectives being addressed with reference to their key elements (for example, population or participants, concepts, and context) or other relevant key elements used to conceptualize the review questions or objectives.                                      | 3                        |
| <b>METHODS</b>                                       |    |                                                                                                                                                                                                                                                                                                                   |                          |
| Protocol and registration                            | 5  | Indicate whether a review protocol exists; state if and where it can be accessed (for example, a Web address); and if available, provide registration information, including the registration number.                                                                                                             | 4                        |
| Eligibility criteria                                 | 6  | Specify characteristics of the sources of evidence used as eligibility criteria (for example, years considered, language, and publication status), and provide a rationale.                                                                                                                                       | 5                        |
| Information sources                                  | 7  | Describe all information sources in the search (for example, databases with dates of coverage and contact with authors to identify additional sources), as well as the date the most recent search was executed.                                                                                                  | 4 + supplementary file 3 |
| Search                                               | 8  | Present the full electronic search strategy for at least 1 database, including any limits used, such that it could be repeated.                                                                                                                                                                                   | Supplementary file 3     |
| Selection of sources of evidence                     | 9  | State the process for selecting sources of evidence (that is, screening and eligibility) included in the scoping review.                                                                                                                                                                                          | 5                        |
| Data charting process                                | 10 | Describe the methods of charting data from the included sources of evidence (for example, calibrated forms or forms that have been tested by the team before their use, and whether data charting was done independently or in duplicate) and any processes for obtaining and confirming data from investigators. | 6                        |
| Data items                                           | 11 | List and define all variables for which data were sought and any assumptions and simplifications made.                                                                                                                                                                                                            | 6                        |
| Critical Appraisal of Individual Sources of Evidence | 12 | Describe methods used for assessing risk of bias of individual studies (including specification of whether this was done at the study or outcome level), and how this information is to be used in any data synthesis.                                                                                            | 6                        |
| Summary measures                                     | 13 | State the principal summary measures (e.g., risk ratio, difference in means).                                                                                                                                                                                                                                     | N/A                      |
| Synthesis of results                                 | 14 | Describe the methods of handling and summarizing the data that were charted.                                                                                                                                                                                                                                      | 6                        |

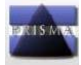

## PRISMA-ScR Checklist

1  
2  
3  
4  
5  
6  
7  
8  
9  
10  
11  
12  
13  
14  
15  
16  
17  
18  
19  
20  
21  
22  
23  
24  
25  
26  
27  
28  
29  
30  
31  
32  
33  
34  
35  
36  
37  
38  
39  
40  
41  
42  
43  
44  
45  
46  
47

|                             |    |                                                                                                                                                  |     |
|-----------------------------|----|--------------------------------------------------------------------------------------------------------------------------------------------------|-----|
| Risk of bias across studies | 15 | Specify any assessment of risk of bias that may affect the cumulative evidence (e.g., publication bias, selective reporting within studies).     | N/A |
| Additional analyses         | 16 | Describe methods of additional analyses (e.g., sensitivity or subgroup analyses, meta-regression), if done, indicating which were pre-specified. | N/A |

| <b>RESULTS</b>                                |    |                                                                                                                                                                                                 |       |
|-----------------------------------------------|----|-------------------------------------------------------------------------------------------------------------------------------------------------------------------------------------------------|-------|
| Selection of Sources of Evidence              | 17 | Give numbers of sources of evidence screened, assessed for eligibility, and included in the review, with reasons for exclusions at each stage, ideally using a flow diagram.                    | 7     |
| Characteristics of Sources of Evidence        | 18 | For each source of evidence, present characteristics for which data were charted and provide the citations.                                                                                     | 7     |
| Critical Appraisal Within Sources of Evidence | 19 | If done, present data on critical appraisal of included sources of evidence (see item 12).                                                                                                      | 7-8   |
| Results of Individual Sources of Evidence     | 20 | For each included source of evidence, present the relevant data that were charted that relate to the review questions and objectives.                                                           | 9-18  |
| Synthesis of results                          | 21 | Summarize or present the charting results as they relate to the review questions and objectives.                                                                                                | 19-21 |
| Risk of bias across studies                   | 22 | Present results of any assessment of risk of bias across studies (see Item 15).                                                                                                                 | N/A   |
| Additional analysis                           | 23 | Give results of additional analyses, if done (e.g., sensitivity or subgroup analyses, meta-regression [see Item 16]).                                                                           | N/A   |
| <b>DISCUSSION</b>                             |    |                                                                                                                                                                                                 |       |
| Summary of evidence                           | 24 | Summarize the main results (including an overview of concepts, themes, and types of evidence available), link to the review questions and objectives, and consider the relevance to key groups. | 22    |
| Limitations                                   | 25 | Discuss the limitations of the scoping review process.                                                                                                                                          | 23    |
| Conclusions                                   | 26 | Provide a general interpretation of the results with respect to the review questions and objectives, as well as potential implications or next steps.                                           | 24    |
| <b>FUNDING</b>                                |    |                                                                                                                                                                                                 |       |
| Funding                                       | 27 | Describe sources of funding for the included sources of evidence, as well as sources of funding for the scoping review. Describe the role of the funders of the scoping review.                 | 26    |

From: Tricco AC, Lillie E, Zarin W, O'Brien KK, Colquhoun H, Levac D, Moher D, Peters MDJ, Horsley T, Weeks L, Hempel S, Akl EA, Chang C, McGowan J, Stewart L, Hartling L, Aldcroft A, Wilson MG, Garritty C, Lewin S, Godfrey CM, Macdonald MT, Langlois EV, Soares-Weiser K, Moriarty J, Clifford T, Tunçalp Ö, Straus SE. PRISMA Extension for Scoping Reviews (PRISMA-ScR): Checklist and Explanation. Ann Intern Med. 2018.

# Protocol for a scoping review on the conceptualization of learning in undergraduate clinical nursing practice

Malou Stoffels, MSc<sup>1,2</sup>; Saskia M. Peerdeman, MD, PhD<sup>1,3</sup>; Hester E. Daelmans, MD, PhD<sup>1,4</sup>; Johannes C.F. Ket<sup>5</sup>; Rashmi A. Kusurkar, MD, PhD<sup>1,6</sup>.

## Correspondence

Correspondence should be addressed to Malou Stoffels, VUmc, Department of Research in Education, PO box 7057, 1007 MB Amsterdam, the Netherlands; telephone: +31204446241; e-mail: m.stoffels@vumc.nl;

<sup>1</sup> Department of Research in Education, VUmc School of Medical Sciences, Amsterdam UMC, Amsterdam, the Netherlands

<sup>2</sup>VUmc Amstel Academy, VU University Medical Center, Amsterdam UMC, Amsterdam, the Netherlands

<sup>3</sup>Department of neurosurgery, VU University Medical Center, Amsterdam UMC, Amsterdam, the Netherlands<sup>2</sup>

<sup>4</sup>Department of skills training, VUmc School of Medical Sciences, Amsterdam UMC, Amsterdam, the Netherlands

<sup>5</sup>Medical Library, Vrije Universiteit, Amsterdam, The Netherlands

<sup>6</sup>LEARN! research institute for learning and education, Faculty of Psychology and Education, VU University Amsterdam, the Netherlands.

## Word count

2385

## Key words

Undergraduate nursing education, learning in practice

## ABSTRACT

**Introduction:** Learning in the clinical setting is a major form of learning in undergraduate nursing education. In spite of this, how nursing students learn in clinical practice is still largely unknown. Moreover, there is no conceptual clarity on learning in practice in the current literature. This paper aims to set up a protocol for a scoping review of the literature in order to map different conceptualizations of learning in undergraduate clinical nursing practice in the hospital setting. The operationalisations of different concepts will be compared and the findings of the studies will be synthesized.

**Methods and analysis:** This scoping review will be guided by the methodological framework proposed by Arksey and O'Malley and refined by Levac et al. and the Joanna Briggs institute. The search strategy will be developed together with a medical information specialist and the search will be performed in electronic databases (PubMed, EBSCO/ERIC and EBSCO/CINAHL). In a first search, we will identify concepts that are used as an equivalent to learning in practice. Next we will search for studies operationalizing these concepts in undergraduate nursing education. Finally, we will check reference lists for additional publications. Abstracts and full-text studies will independently be screened by two researchers. All studies that have 'learning in undergraduate clinical nursing practice' as their main topic and that include a definition of operationalization of an equivalent to learning in clinical practice, will be considered for inclusion. We will chart different conceptualisations and their theoretical underpinnings, as well as reported learning opportunities, informal and formal aspects of learning, social aspects of learning and gaps in the literature.

**Ethics and dissemination:** This review will help design future studies on learning in clinical nursing practice using well-defined and agreed upon terminology. The results will be disseminated through journal publications and conference presentations.

## ARTICLE SUMMARY

### Strengths and limitations of this study

- This protocol outlines a rigorous design that includes an established research framework, a search strategy and a selection process.
- The search strategy includes different databases with peer-reviewed literature, with no restrictions to the study design or the publication date.
- The assessment of the quality of the included papers will enable identifying gaps in the literature.

- A limitation is that the literature search will only cover undergraduate nursing education, while a comparison with literature on learning in practice in other health professions would enrich our understanding of potential conceptualizations.
- This study will not include books or grey literature, which will allow us to map how learning in practice is conceptualized in original research.

## INTRODUCTION

Learning in the clinical setting is crucial for becoming a competent nurse<sup>1</sup>. However, how nursing students learn in clinical practice is still largely unknown. A vast body of knowledge exists on factors that influence learning, but the process itself remains underexposed<sup>4</sup>. For example, there is a lack of insight into how individual learning outcomes can be predicted, or which learning opportunities best promote students' learning<sup>5</sup>. Understanding learning in the clinical setting can help design, supervise and evaluate individual learning trajectories and their outcomes in practice. This study aims to set up a protocol for a scoping review to examine how different concepts that are equivalent to 'learning in practice' are used and operationalized in the literature, and what these studies add to our understanding of learning in the clinical setting

In the educational literature, the concept of 'learning in practice' has been widely studied in the context of workplace learning by professionals<sup>6</sup> or practice learning by students<sup>7</sup>. However, there is no unified definition or approach towards this concept<sup>8</sup>. Two main characteristics of clinical learning can be clearly distinguished in the literature. First, learning in practice is often distinguished from learning in the classroom setting as informal opposed to formal learning, where informal learning arises in situations where learning is not the primary aim<sup>9</sup>. However, some authors question the validity of a dichotomy between formal and informal learning<sup>10</sup>, and state that every learning situation contains both formal and informal elements<sup>11</sup>. This would particularly apply to clinical learning, which is characterized by a constant interplay of the 'reality' of clinical practice and formal learning interventions such as feedback and assessment<sup>12</sup>. Another essential characteristic of workplace learning is its social rather than individual nature<sup>13</sup>. That is, learning occurs in interaction and dialogue with others<sup>9</sup>.

In the nursing education literature, just as in other health professions education literature, different terms are used to describe and study learning in clinical practice, with different theoretical underpinnings. Moreover, the rationale behind the application of the concepts used is not always explained. Therefore, it is not always clear whether these different terms refer to the same concept, and how they are defined in terms of learning content (skills, knowledge, values), process (implicit,

1  
2  
3 explicit), control (intended or unintended, guided or not guided) and learning outcomes. Also,  
4 different researchers appear to apply the same concept differently. Having clear and agreed upon  
5 terminology can help design future studies that can contribute to understanding learning in clinical  
6 practice along with its limitations so that nursing wards can be organized for optimal benefit of the  
7 students.  
8  
9

10  
11  
12 The goal of this scoping review is to provide guidance for the use of concepts that describe learning  
13 in undergraduate clinical nursing practice in future studies. This study therefore aims to examine how  
14 different concepts that are equivalent to 'learning in practice' are used and operationalized in the  
15 literature. Therefore, we will look for studies that examine how learning in the clinical setting takes  
16 place. To enable comparison of the use of different concepts, we will focus on the general hospital  
17 setting. This context is the traditional setting for nursing training and comprises a variety of factors  
18 that may be relevant for learning, such as the presence of registered nurses, peers, and other  
19 professionals, as well as complex and acute patients, thereby offering a wide array of  
20 multidimensional learning opportunities<sup>14</sup>. We will particularly consider how formal and informal  
21 aspects of learning, as well as the social component of learning are included in these  
22 operationalisations. We will synthesize the results relating to how students learn in clinical practice.  
23  
24  
25  
26  
27  
28  
29  
30

31 A body of work on concepts to describe learning in practice does exist outside nursing education  
32 literature<sup>15</sup>. To our knowledge, the only study that included distinct concepts of learning in clinical  
33 practice in a review before, was a concept analysis of work-based learning in health care education  
34 by Manley, et al.<sup>16</sup>. The authors identified common attributes, enabling factors and consequences of  
35 workplace learning and proposed a definition. The current review will build on this work by closely  
36 examining different concepts of learning in practice in the context of undergraduate nursing  
37 education, as well as comparing how they are used to study clinical learning. This will enable us to  
38 address gaps in the literature as well as make suggestions for the use of terminology in future studies  
39 Also, the current study will include literature after 2009 when Manley, et al.<sup>16</sup> conducted their study.  
40 In interpreting our findings, we will consider the broader body of literature on learning in practice.  
41  
42  
43  
44  
45  
46  
47  
48

## 49 **METHODS AND ANALYSIS**

50  
51  
52 We decided to use the scoping review approach to map the different concepts that are used to study  
53 learning in clinical nursing practice as well as the way they are operationalised and the information  
54 they provide about how students learn in the clinical setting. Since the lack of a focused line of  
55 inquiry requires a broad research question, we consider a scoping review to be more appropriate  
56 than a systematic review. Scoping can help understand complex concepts through clarifying  
57  
58  
59  
60



1  
2  
3 definitions and conceptual boundaries<sup>17</sup>. Scoping will also enable us to identify key concepts, gaps in  
4 the literature, and types and sources of evidence to inform practice, policymaking, and research<sup>18</sup>. To  
5 get a comprehensive picture of the existing research, we will include studies with different designs.  
6 Since scoping reviews are hypothesis-generating rather than hypothesis-testing, this review can  
7 provide a stepping off point for further research.  
8  
9

10  
11  
12 Standardized reporting guidelines can help the critical appraisal of reviews and thereby increase their  
13 reproducibility, completeness, and transparency<sup>19</sup>. For systematic reviews, the PRISMA-P checklist  
14 has been developed to facilitate the preparation of a robust research protocol<sup>20</sup>. PRISMA guidelines  
15 for scoping reviews are still under development<sup>21</sup>. We therefore used relevant items of the PRISMA-P  
16 (Preferred Reporting Items for Systematic Reviews and Meta-analysis Protocols) to draft this  
17 protocol, as outlined in additional file 1.  
18  
19  
20  
21

22  
23 To ensure rigor in reporting the methodology, we will use the six-stage approach developed by  
24 Arksey and O'Malley<sup>22</sup> and refined by Levac, et al.<sup>23</sup> and the Joanna Briggs institute<sup>24</sup> (1) identifying  
25 the research question; (2) identifying relevant studies; (3) selecting studies; (4) charting the data; (5)  
26 collating, summarizing and reporting the results; (6) expert consultation (optional and included).  
27  
28  
29  
30

### 31 32 *Stage 1. Identifying the research question*

33  
34 Since our aim is to understand how learning in undergraduate clinical nursing practice is  
35 conceptualized in the current literature irrespective of research design and outcome, our research  
36 question is:  
37  
38  
39

- 40 • How are different concepts that are used as an equivalent to learning in the hospital setting  
41 operationalized in the undergraduate nursing education literature?  
42  
43  
44

45 As scoping is an iterative process<sup>22</sup>, we might add additional questions based on our findings along  
46 the review process. While the eventual goal of this study is to contribute to the understanding of the  
47 process of nursing students' learning in practice, we will also synthesize results that are relevant to  
48 this topic.  
49  
50  
51

### 52 *Stage 2. Identify relevant studies*

53  
54 The search strategy will be iteratively developed by the research team. As suggested by the Joanna  
55 Briggs institute<sup>24</sup>, we will start with a very broad search to inform our subsequent search strategy. A  
56 comprehensive search strategy will be developed (by MS and JCFK) to conduct this stepwise search  
57  
58  
59  
60

1  
2  
3 process following the Peer Review of Electronic Search Strategies (PRESS) 2015 guideline statement  
4  
5<sup>25</sup>.

6  
7 In an initial search (search step 1), we will combine the terms 'learning in clinical practice' and  
8  
9 'undergraduate nursing students'. The search query for both steps will first be developed for  
10  
11 PubMed and later extended to EBSCO/ERIC and EBSCO/CINAHL to identify different concepts in the  
12  
13 literature that are used as an equivalent to 'learning in clinical practice' by nursing students. See our  
14  
15 draft search in the additional file 2 for step 1 of our search. The first 100 search results from each  
16  
17 database will be reviewed by the researchers to assess validity of the search strategy. When  
18  
19 agreement has been reached about the initial search strategy, the first 200 abstracts will be scanned  
20  
21 by the two reviewers (MS and RAK) on concepts potentially eligible for inclusion in the second search  
22  
23 step. Eligible concepts are concepts that describe the process of learning to become a nurse within  
24  
25 the clinical context ('such as 'experiential learning' or 'informal learning'), rather than specific aspects  
26  
27 or (such as 'skill acquisition' or 'peer learning'). In case of full agreement between the two reviewers  
28  
29 on potentially eligible concepts, the first reviewer will screen the rest of the abstracts. In case of  
30  
31 disagreement, the second author will scan another 200 abstracts until full agreement is reached.  
32  
33 After all abstracts have been screened, the two reviewers will discuss all potentially eligible concepts  
34  
35 and select concepts to be included in the second search step.

36  
37 After having selected the different concepts, we will develop a search query (search step 2) in  
38  
39 PubMed and subsequently extend to EBSCO/ERIC and EBSCO/CINAHL combining each of the  
40  
41 identified concepts with 'undergraduate nursing' to find studies operationalizing one of the identified  
42  
43 concepts in the literature on nursing students' learning in the hospital setting.

44  
45 After these two searches, we will check reference lists for additional publications (See figure 1 for a  
46  
47 flow diagram of the search and selection process). We will conduct the two searches in June 2018.

### 48 *Stage 3. Study selection*

49  
50 Following the second step of our search strategy, two independent researchers will screen abstracts  
51  
52 and assess the eligibility for full text retrieval. Selected full-text studies will again be compared  
53  
54 between the reviewers with disagreement being resolved through discussion and consensus and  
55  
56 with input from the full research team.

57  
58 The inclusion criteria will be developed in an iterative process in which the reviewers calibrate a  
59  
60 threshold for inclusion and exclusion. The initial inclusion criteria will be:

- Original research or reviews in peer reviewed journals that have learning in undergraduate clinical nursing practice in the hospital setting as one of their main topics, regardless of publication date and type of article.
- Studies that examine how students learn in the clinical hospital setting

Since we are interested in how learning in practice is operationalized in peer-reviewed research, we exclude books, book reviews, commentaries, letters to the editor, PhD theses, and reports. Reasons for exclusion will be documented at the full-text review stage.

#### *Stage 4. Charting the data*

Data will be extracted from full-text journal articles which meet the aforementioned inclusion criteria. A draft analytic frame is developed to document selected studies into an excel spreadsheet, including study characteristics (year, country, methodology, study question, study design, participants, outcomes, study quality), conceptualization of learning in practice (definitions, theoretical underpinnings/rationale, operationalisations, formal/informal aspects of learning, social interactions, learning opportunities) and reported gaps in the literature. Other categories that come during the data extraction progress will be discussed in the research team and added to the data extraction form. Although formal assessment of study quality is generally not performed in scoping reviews<sup>24</sup>, some claim it should be incorporated in the methodology<sup>18</sup>. Assessing study quality will enable us to address not only quantitative, but also qualitative gaps in the literature<sup>23</sup>. We will therefore assess the quality of included studies by a set of quality indicators for reviews developed by Buckley, et al.<sup>26</sup>. The form will be piloted on 5–10 articles by the team and will allow us to analyse the selected articles through a common framework.

We will document studies that are not selected for full text retrieval in a separate file. To ensure accurate data collection, each reviewer's independent charted data will be compared and any discrepancies will be iteratively discussed by the researchers to ensure consistency between the reviewers.

#### *Stage 5. Collating, summarizing and reporting results*

A PRISMA flow diagram will be used to report final numbers in the resulting study publication. As we expect a diverse body of knowledge, we will give a descriptive account of concepts and subsequent operationalizations. We will synthesise study findings using narrative descriptions based on themes that emerge from the extracted data. The results will be compared and consolidated through consensus between two of the r MS and RAK.

1  
2  
3 We will address both quantitative and qualitative gaps in the literature. We will discuss the data in  
4 the light of relevant theories on workplace learning both in and outside nursing education literature  
5 and make suggestions for the operationalization of learning in practice for future studies.  
6  
7

#### 8 9 *Stage 6. Expert consultation*

10  
11 In order to confirm our findings and interpretations, two nurse educators, with experience in  
12 scientific research and expertise on learning in clinical practice, will be approached for consultation.  
13  
14

### 15 16 **ETHICS AND DISSEMINATION**

17  
18 This scoping review will be the first study to compare terminology used for learning in undergraduate  
19 nursing clinical practice and thereby will contribute to the design and comparison of future studies in  
20 this field. This protocol reports a comprehensive, rigorous and transparent methodology. The results  
21 will be disseminated through a peer-reviewed publication and national and international conferences  
22 such as the AMEE (Association of Medical Education in Europe) conference, targeting an audience  
23 involved in undergraduate nursing education. By identifying gaps in the current body of literature,  
24 this study can guide future nursing education research. Both the methodology and the results may be  
25 of interest for researchers and educators in other health professions than nursing, given the widely  
26 spread importance of learning in clinical practice. Since the methodology applied consists of  
27 reviewing and collecting data from publicly available materials, this study does not require an ethical  
28 approval.  
29  
30  
31  
32  
33  
34  
35  
36  
37

### 38 39 **PATIENT AND PUBLIC INVOLVEMENT**

- 40  
41 - *How was the development of the research question and outcome measures informed*  
42 *by patients' priorities, experience, and preferences?* As education is essential for  
43 improving patient care, patients will eventually benefit from the body of knowledge  
44 this study contributes to. However, specific interests of patients have not been  
45 examined.  
46  
47 - *How did you involve patients in the design of this study?* Patients have not been  
48 involved in the study.  
49  
50 - *Were patients involved in the recruitment to and conduct of the study?* No.  
51 *How will the results be disseminated to study participants?* As this concerns a review,  
52 this study has no participants.  
53  
54 - *For randomised controlled trials, was the burden of the intervention assessed by*  
55 *patients themselves?* Not applicable  
56  
57 - *Patient advisers should also be thanked in the contributorship*  
58 *statement/acknowledgements.* Not applicable  
59  
60 - *If patients and or public were not involved please state this.* Not applicable

## REFERENCES

1. Cope P, Cuthbertson P, Stoddart B. Situated learning in the practice placement. *J Adv Nurs* 2000;31(4):850-56.
2. Egan T, Jaye C. Communities of clinical practice: the social organization of clinical learning. *Health*: 2009;13(1):107-25.
3. Henderson A, Cooke M, Creedy DK, et al. Nursing students' perceptions of learning in practice environments: a review. *Nurse Educ Today* 2012;32(3):299-302. doi: 10.1016/j.nedt.2011.03.010 [published Online First: 2011/04/26]
4. Flott EA, Linden L. The clinical learning environment in nursing education: a concept analysis. *J Adv Nurs* 2016;72(3):501-13. doi: 10.1111/jan.12861
5. Ironside PM, McNelis AM, Ebricht P. Clinical education in nursing: rethinking learning in practice settings. *Nurs Outlook* 2014;62(3):185-91. doi: 10.1016/j.outlook.2013.12.004
6. Billett S. Learning through work: workplace affordances and individual engagement. *J Workplace Learn* 2001;13(5):209-14. doi: 10.1108/eum0000000005548
7. Guile D, Griffiths T. Learning Through Work Experience. *J Educ Work* 2001;14(1):113-31. doi: 10.1080/13639080020028738
8. Manuti A, Pastore S, Scardigno AF, et al. Formal and informal learning in the workplace: a research review. *Int J Train Dev* 2015;19(1):1-17.
9. Tynjälä P. Perspectives into learning at the workplace. *Educ Res Rev* 2008;3(2):130-54. doi: 10.1016/j.edurev.2007.12.001
10. Billett S. Critiquing workplace learning discourses: Participation and continuity at work. *Studies in the Education of Adults* 2002;34(1):56-67.
11. Janssens L, Smet K, Onghena P, et al. The relationship between learning conditions in the workplace and informal learning outcomes: a study among police inspectors. *Int J Train Dev* 2016
12. Andrews GJ, Brodie DA, Andrews JP, et al. Professional roles and communications in clinical placements: a qualitative study of nursing students' perceptions and some models for practice. *Int J Nurs Stud* 2006;43(7):861-74.
13. Eraut M. Informal learning in the workplace. *Stud Cont Educ* 2004;26(2):247-73. doi: 10.1080/158037042000225245
14. Bisholt B, Ohlsson U, Engstrom AK, et al. Nursing students' assessment of the learning environment in different clinical settings. *Nurse Educ Pract* 2014;14(3):304-10. doi: 10.1016/j.nepr.2013.11.005 [published Online First: 2013/12/21]
15. Billett S. Mimesis: Learning Through Everyday Activities and Interactions at Work. *Hum Resource Dev Rev* 2014;13(4):462-82. doi: 10.1177/1534484314548275
16. Manley K, Titchen A, Hardy S. Work-based learning in the context of contemporary health care education and practice: A concept analysis. *Pract Dev Health Care* 2009;8(2):87-127. doi: 10.1002/pdh.284
17. Davis K, Drey N, Gould D. What are scoping studies? A review of the nursing literature. *Int J Nurs Stud* 2009;46(10):1386-400. doi: 10.1016/j.ijnurstu.2009.02.010
18. Daudt HM, van Mossel C, Scott SJ. Enhancing the scoping study methodology: a large, inter-professional team's experience with Arksey and O'Malley's framework. *BMC Med Res Methodol* 2013;13(1):48.
19. Colquhoun HL, Levac D, O'Brien KK, et al. Scoping reviews: time for clarity in definition, methods, and reporting. *J Clin Epidemiol* 2014;67(12):1291-4. doi: 10.1016/j.jclinepi.2014.03.013
20. Moher D, Shamseer L, Clarke M, et al. Preferred reporting items for systematic review and meta-analysis protocols (PRISMA-P) 2015 statement. *Syst Rev* 2015;4(1):1.

- 1
- 2
- 3 21. Tricco A, Straus S, Moher D. Preferred reporting items for systematic reviews and meta-analysis:  
4 extension for Scoping Reviews (PRISMA-ScR). *EQUATOR Netw* [http://www.equator-network](http://www.equator-network.org/wp-content/uploads/2009/02/Executive-summary_ScR_Dec-9.pdf)  
5 *org/wp-content/uploads/2009/02/Executive-summary\_ScR\_Dec-9.pdf* (accessed 20 May  
6 2017) 2017
- 7
- 8 22. Arksey H, O'Malley L. Scoping studies: towards a methodological framework. *International*  
9 *Journal of Social Research Methodology* 2005;8(1):19-32. doi:  
10 10.1080/1364557032000119616
- 11 23. Levac D, Colquhoun H, O'Brien KK. Scoping studies: advancing the methodology. *Implementation*  
12 *science* 2010;5(1):69.
- 13 24. Peters M, Godfrey C, McInerney P, et al. Chapter 11: Scoping Reviews. In: E A, Z M, eds. Joanna  
14 Briggs Institute Reviewer's Manual: The Joanna Briggs Institute 2017.
- 15 25. McGowan J, Sampson M, Salzwedel DM, et al. PRESS Peer Review of Electronic Search Strategies:  
16 2015 Guideline Statement. *J Clin Epidemiol* 2016;75:40-6. doi: 10.1016/j.jclinepi.2016.01.021
- 17 26. Buckley S, Coleman J, Davison I, et al. The educational effects of portfolios on undergraduate  
18 student learning: a Best Evidence Medical Education (BEME) systematic review. BEME Guide  
19 No. 11. *Med Teach* 2009;31(4):282-98.
- 20
- 21
- 22
- 23

#### 24 **AUTHOR STATEMENT**

25  
26 MS and RAK were responsible for the initial design of this study MS, HED, RAK, SP, JCFK, contributed  
27 to the development of the eligibility and data extraction criteria JCFK, MS, HED, RAK, developed and  
28 executed the search strategy. MS and RAK are responsible for abstract and full-text screening. MS  
29 conceptualized the review approach and led the writing of the manuscript. MS, RAK, HED, SP, JCFK  
30 contributed and approved the final version of this protocol. RAK led the supervision of the  
31 manuscript preparation.

#### 32 **FUNDING**

33  
34 This research received no specific grant from any funding agency in the public, commercial or not-  
35 for-profit sectors.

#### 36 **CONFLICT OF INTERESTS**

37  
38 The authors declare that they have no competing interests.

**Supplementary file 3. Draft search strategy step 1 and 2****1. Search strategy step 1****PubMed (9 May 2018)**

| Search | Query                                                                                                                                                                                                                                                                                                                                                                                           | Items found |
|--------|-------------------------------------------------------------------------------------------------------------------------------------------------------------------------------------------------------------------------------------------------------------------------------------------------------------------------------------------------------------------------------------------------|-------------|
| #1     | "Students, Nursing"[Mesh] OR "Internship, Nonmedical"[Mesh:noexp] OR (nursing[tiab] AND student*[tiab]) OR ((nursing[tiab] OR nurse[tiab] OR nurses[tiab]) AND internship*[tiab])) AND (((("Clinical Competence"[Mesh] OR "Clinical Medicine"[Majr] OR clinical*[ti] OR clinical*[ot] OR practice*[ti] OR practice[ot]) AND ("Learning"[Mesh] OR learning*[tiab])) OR clinical learning*[tiab]) | 3,586       |

**Ebsco/ERIC (9 May 2018)**

| Search | Query                                                                                                                                                                                                                                                                                                                                                                                                                                                                                                                                                                                                                                                                                                                                                                                                                                                                                                                                                                                                                                                                                                                                                                                                                                                                                                                                                                                                                                                                                                                                                                                                                                                                                                                                                                                                                                                                                                                                                          | Items found |
|--------|----------------------------------------------------------------------------------------------------------------------------------------------------------------------------------------------------------------------------------------------------------------------------------------------------------------------------------------------------------------------------------------------------------------------------------------------------------------------------------------------------------------------------------------------------------------------------------------------------------------------------------------------------------------------------------------------------------------------------------------------------------------------------------------------------------------------------------------------------------------------------------------------------------------------------------------------------------------------------------------------------------------------------------------------------------------------------------------------------------------------------------------------------------------------------------------------------------------------------------------------------------------------------------------------------------------------------------------------------------------------------------------------------------------------------------------------------------------------------------------------------------------------------------------------------------------------------------------------------------------------------------------------------------------------------------------------------------------------------------------------------------------------------------------------------------------------------------------------------------------------------------------------------------------------------------------------------------------|-------------|
| S7     | S1 AND S6                                                                                                                                                                                                                                                                                                                                                                                                                                                                                                                                                                                                                                                                                                                                                                                                                                                                                                                                                                                                                                                                                                                                                                                                                                                                                                                                                                                                                                                                                                                                                                                                                                                                                                                                                                                                                                                                                                                                                      | 408         |
| S6     | S4 OR S5                                                                                                                                                                                                                                                                                                                                                                                                                                                                                                                                                                                                                                                                                                                                                                                                                                                                                                                                                                                                                                                                                                                                                                                                                                                                                                                                                                                                                                                                                                                                                                                                                                                                                                                                                                                                                                                                                                                                                       | 70,505      |
| S5     | TI ("clinical learning*") OR AB ("clinical learning*")                                                                                                                                                                                                                                                                                                                                                                                                                                                                                                                                                                                                                                                                                                                                                                                                                                                                                                                                                                                                                                                                                                                                                                                                                                                                                                                                                                                                                                                                                                                                                                                                                                                                                                                                                                                                                                                                                                         | 84          |
| S4     | S2 AND S3                                                                                                                                                                                                                                                                                                                                                                                                                                                                                                                                                                                                                                                                                                                                                                                                                                                                                                                                                                                                                                                                                                                                                                                                                                                                                                                                                                                                                                                                                                                                                                                                                                                                                                                                                                                                                                                                                                                                                      | 70,505      |
| S3     | DE "Learning" OR DE "Active Learning" OR DE "Adult Learning" OR DE "Associative Learning" OR DE "Aural Learning" OR DE "Cooperative Learning" OR DE "Discovery Learning" OR DE "Discrimination Learning" OR DE "Electronic Learning" OR DE "Experiential Learning" OR DE "Incidental Learning" OR DE "Intentional Learning" OR DE "Interference (Learning)" OR DE "Lifelong Learning" OR DE "Mastery Learning" OR DE "Multisensory Learning" OR DE "Nonverbal Learning" OR DE "Observational Learning" OR DE "Prior Learning" OR DE "Problem Based Learning" OR DE "Rote Learning" OR DE "Second Language Learning" OR DE "Sequential Learning" OR DE "Serial Learning" OR DE "Student Centered Learning" OR DE "Symbolic Learning" OR DE "Transfer of Training" OR DE "Transformative Learning" OR DE "Verbal Learning" OR DE "Visual Learning" OR DE "Workplace Learning" OR DE "Active Learning" OR DE "Adult Learning" OR DE "Associative Learning" OR DE "Paired Associate Learning" OR DE "Aural Learning" OR DE "Cooperative Learning" OR DE "Discovery Learning" OR DE "Discrimination Learning" OR DE "Electronic Learning" OR DE "Experiential Learning" OR DE "Field Experience Programs" OR DE "Internship Programs" OR DE "Job Shadowing" OR DE "Service Learning" OR DE "Incidental Learning" OR DE "Intentional Learning" OR DE "Interference (Learning)" OR DE "Lifelong Learning" OR DE "Mastery Learning" OR DE "Multisensory Learning" OR DE "Nonverbal Learning" OR DE "Perceptual Motor Learning" OR DE "Observational Learning" OR DE "Prior Learning" OR DE "Problem Based Learning" OR DE "Rote Learning" OR DE "Second Language Learning" OR DE "Sequential Learning" OR DE "Serial Learning" OR DE "Student Centered Learning" OR DE "Symbolic Learning" OR DE "Transfer of Training" OR DE "Transformative Learning" OR DE "Verbal Learning" OR DE "Visual Learning" OR DE "Workplace Learning" OR TI (learning*) OR AB (learning*) | 381,995     |
| S2     | DE "Clinical Experience" OR TI (clinical* OR practice*) OR AB (clinical* OR practice*)                                                                                                                                                                                                                                                                                                                                                                                                                                                                                                                                                                                                                                                                                                                                                                                                                                                                                                                                                                                                                                                                                                                                                                                                                                                                                                                                                                                                                                                                                                                                                                                                                                                                                                                                                                                                                                                                         | 205,148     |

|           |                                                                                                                                                                                     |              |
|-----------|-------------------------------------------------------------------------------------------------------------------------------------------------------------------------------------|--------------|
| <b>S1</b> | DE "Nursing Students" OR TI ((nursing N3 student*) OR ((nursing OR nurse OR nurses) N3 internship*)) OR AB ((nursing N3 student*) OR ((nursing OR nurse OR nurses) N3 internship*)) | <b>2,294</b> |
|-----------|-------------------------------------------------------------------------------------------------------------------------------------------------------------------------------------|--------------|

**Ebsco/CINAHL (9 May 2018)**

| Search     | Query                                                                                                                                                                                                                                                                | Items found    |
|------------|----------------------------------------------------------------------------------------------------------------------------------------------------------------------------------------------------------------------------------------------------------------------|----------------|
| <b>S11</b> | S1 AND S10                                                                                                                                                                                                                                                           | <b>3,209</b>   |
| <b>S10</b> | S5 OR S9                                                                                                                                                                                                                                                             | <b>14,430</b>  |
| <b>S9</b>  | S3 AND S8                                                                                                                                                                                                                                                            | <b>12,924</b>  |
| <b>S8</b>  | MH "Clinical Competence+" OR TI (clinical* OR practice*)                                                                                                                                                                                                             | <b>234,601</b> |
| <b>S7</b>  | S1 AND S6                                                                                                                                                                                                                                                            | <b>5,669</b>   |
| <b>S6</b>  | S4 OR S5                                                                                                                                                                                                                                                             | <b>32,948</b>  |
| <b>S5</b>  | MH "Learning Environment, Clinical" OR TI ("clinical learning*") OR AB ("clinical learning*")                                                                                                                                                                        | <b>2,388</b>   |
| <b>S4</b>  | S2 AND S3                                                                                                                                                                                                                                                            | <b>31,869</b>  |
| <b>S3</b>  | MH "Learning+" OR MH "Conditioning (Psychology)+" OR MH "Memory+" OR MH "Reinforcement (Psychology)+" OR MH "Problem Solving+" OR TI (learning*) OR AB (learning*)                                                                                                   | <b>103,547</b> |
| <b>S2</b>  | MH "Clinical Competence+" OR TI (clinical* OR practice*) OR AB (clinical* OR practice*)                                                                                                                                                                              | <b>631,184</b> |
| <b>S1</b>  | MH "Students, Nursing+" OR MH "Students, Nursing, Baccalaureate+" OR MH "Students, Nursing, Graduate+" OR TI ((nursing N3 student*) OR ((nursing OR nurse OR nurses) N3 internship*)) OR AB ((nursing N3 student*) OR ((nursing OR nurse OR nurses) N3 internship*)) | <b>35,637</b>  |

**2. Search strategy and numbers of hits step 2**

**2.1 search strategy**

*(PubMed: (concept\*[tiab] OR (conceptpart1\*[ti] AND conceptpart2\*[ti]) OR (conceptpart1 [ot] AND conceptpart2\*[ot]))) If integral concept could not be found in the Index, this was composed with an AND relation.*

- [Mesh] = Medical Subject Headings, keywords in PubMed
- [tiab] = words in title or abstract
- [ti] = words in title
- [ot] = other terms, in particular author keywords
- MH = mapped heading, keyword in CINAHL
- DE = descriptor, keyword in ERIC



TI = words in title

AB = words in abstract

| Search | PubMed                                                                                                                                                                                                             | Ebsco/ERIC                                                                                                                                                                          | Ebsco/CINAHL                                                                                                                                                                                                                                                         |
|--------|--------------------------------------------------------------------------------------------------------------------------------------------------------------------------------------------------------------------|-------------------------------------------------------------------------------------------------------------------------------------------------------------------------------------|----------------------------------------------------------------------------------------------------------------------------------------------------------------------------------------------------------------------------------------------------------------------|
| #1     | "Students, Nursing"[Mesh] OR "Internship, Nonmedical"[Mesh:noexp] OR ((nursing[tiab] OR nurse[tiab] OR nurses[tiab]) AND student*[tiab]) OR ((nursing[tiab] OR nurse[tiab] OR nurses[tiab]) AND internship*[tiab]) | DE "Nursing Students" OR TI ((nursing N3 student*) OR ((nursing OR nurse OR nurses) N3 internship*)) OR AB ((nursing N3 student*) OR ((nursing OR nurse OR nurses) N3 internship*)) | MH "Students, Nursing+" OR MH "Students, Nursing, Baccalaureate+" OR MH "Students, Nursing, Graduate+" OR TI ((nursing N3 student*) OR ((nursing OR nurse OR nurses) N3 internship*)) OR AB ((nursing N3 student*) OR ((nursing OR nurse OR nurses) N3 internship*)) |
| #2     | authentic learning*[tiab] OR (authentic*[ti] AND learning*[ti]) OR (authentic*[ot] AND learning*[ot])                                                                                                              | TI (authentic* AND learning*) OR AB ("authentic learning*")                                                                                                                         | TI (authentic* AND learning*) OR AB ("authentic learning*")                                                                                                                                                                                                          |
| #3     | clinical learning*[tiab]                                                                                                                                                                                           | TI ("clinical learning*") OR AB ("clinical learning*")                                                                                                                              | TI (authentic* AND learning*) OR AB ("authentic learning*")                                                                                                                                                                                                          |
| #4     | clinical placement learning*[tiab] OR (clinical placement*[ti] AND learning*[ti]) OR (clinical placement*[ot] AND learning*[ot])                                                                                   | TI ("clinical placement"* AND learning*) OR AB ("clinical placement learning*")                                                                                                     | TI ("clinical placement"* AND learning*) OR AB ("clinical placement learning*")                                                                                                                                                                                      |
| #5     | (clinically based*[tiab] AND learning*[tiab])                                                                                                                                                                      | TI ("clinically based" AND learning*) OR AB ("clinically based learning*")                                                                                                          | TI ("clinically based" AND learning*) OR AB ("clinically based learning*")                                                                                                                                                                                           |
| #6     | (experiential learning*[tiab] OR (experiential*[ti] AND learning*[ti]) OR (experiential*[ot] AND learning*[ot]))                                                                                                   | DE "experiential learning" OR TI (experiential* AND learning*) OR AB ("experiential learning*")                                                                                     | MH "Experiential learning" OR TI (experiential* AND learning*) OR AB ("experiential learning*")                                                                                                                                                                      |
| #7     | experimental learning*[tiab] OR (experimental*[ti] AND learning*[ti]) OR (experimental*[ot] AND learning*[ot])                                                                                                     | TI (experimental* AND learning*) OR AB ("experimental learning*")                                                                                                                   | TI (experimental* AND learning*) OR AB ("experimental learning*")                                                                                                                                                                                                    |
| #8     | hidden curriculum*[tiab] OR (hidden*[ti] AND curriculum*[ti]) OR (hidden*[ot] AND curriculum*[ot])                                                                                                                 | DE "hidden curriculum" OR TI (hidden* AND curriculum*) OR AB ("hidden curriculum*")                                                                                                 | TI (hidden* AND curriculum*) OR AB ("hidden curriculum*")                                                                                                                                                                                                            |
| #9     | informal learning*[tiab] OR (informal*[ti] AND learning*[ti]) OR (informal*[ot] AND learning*[ot])                                                                                                                 | TI (informal* AND learning*) OR AB ("informal learning*")                                                                                                                           | TI (informal* AND learning*) OR AB ("informal learning*")                                                                                                                                                                                                            |
| #10    | learning by doing*[tiab] OR (learning*[ti] AND doing*[ti]) OR (learning*[ot] AND doing*[ot])                                                                                                                       | TI (learning* AND doing*) OR AB ("learning by doing*")                                                                                                                              | TI (learning* AND doing*) OR AB ("learning by doing*")                                                                                                                                                                                                               |

|     |                                                                                                                           |                                                                                                           |                                                                                                           |
|-----|---------------------------------------------------------------------------------------------------------------------------|-----------------------------------------------------------------------------------------------------------|-----------------------------------------------------------------------------------------------------------|
| #11 | "learning from experience*" [tiab]                                                                                        | TI "learning w1 experience*" OR AB "learning w1 experience"                                               | TI "learning w1 experience*" OR AB "learning w1 experience"                                               |
| #12 | "learning through experience*" [tiab]                                                                                     | TI ("learning through experience*" OR AB ("learning through experience*"))                                | TI ("learning through experience*" OR AB ("learning through experience*"))                                |
| #13 | (learning* [tiab] AND clinical placement experience* [tiab])                                                              | TI (learning* AND "clinical placement experience") OR AB ("learning from clinical placement experience*") | TI (learning* AND "clinical placement experience") OR AB ("learning from clinical placement experience*") |
| #14 | practice based learning* [tiab] OR (practice based* [ti] AND learning* [ti]) OR (practice based* [ot] AND learning* [ot]) | TI ("practice based*" AND learning*) OR AB ("practice based learning*")                                   | TI ("practice based*" AND learning*) OR AB ("practice based learning*")                                   |
| #15 | practice learning* [tiab]                                                                                                 | TI ("practice learning*") OR AB ("practice learning*")                                                    | TI ("practice learning*") OR AB ("practice learning*")                                                    |
| #16 | learning from practice* [tiab]                                                                                            | TI (learning w1 practice*) OR AB (learning w1 practice*)                                                  | TI (learning w1 practice*) OR AB (learning w1 practice*)                                                  |
| #17 | learning in practice* [tiab]                                                                                              | TI (learning w1 practice*) OR AB (learning w1 practice*)                                                  | TI (learning w1 practice*) OR AB (learning w1 practice*)                                                  |
| #18 | (learning* [tiab] AND clinical practicum* [tiab])                                                                         | TI (learning* AND "clinical practicum*") OR AB (learning w2 clinical practicum*)                          | TI (learning* AND "clinical practicum*") OR AB (learning w2 clinical practicum*)                          |
| #19 | (learning* [tiab] AND clinical field* [tiab])                                                                             | TI (learning* AND "clinical field*") OR AB (learning w2 clinical field*)                                  | TI (learning* AND "clinical field*") OR AB (learning w2 clinical field*)                                  |
| #20 | (learning* [tiab] AND clinical context* [tiab])                                                                           | TI (learning* AND "clinical context*") OR AB (learning w2 clinical context*)                              | TI (learning* AND "clinical context*") OR AB (learning w2 clinical context*)                              |
| #21 | (learning* [tiab] AND clinical setting* [tiab])                                                                           | TI (learning* AND "clinical setting*") OR AB (learning w2 clinical setting*)                              | TI (learning* AND "clinical setting*") OR AB (learning w2 clinical setting*)                              |
| #22 | (learning* [tiab] AND clinical nursing environment* [tiab])                                                               | TI (learning* AND "clinical nursing environment*") OR AB (learning w2 clinical nursing environment*)      | TI (learning* AND "clinical nursing environment*") OR AB (learning w2 clinical nursing environment*)      |
| #23 | (learning* [tiab] AND clinical environment* [tiab])                                                                       | TI (learning* AND "clinical environment*") OR AB (learning w2 clinical environment*)                      | TI (learning* AND "clinical environment*") OR AB (learning w2 clinical environment*)                      |
| #24 | learning on the job* [tiab] OR (learning* [ti] AND on the job* [ti]) OR (learning* [ot] AND on the job* [ot])             | TI (learning* AND "on the job*") OR AB ("learning on the job*")                                           | TI (learning* AND "on the job*") OR AB ("learning on the job*")                                           |
| #25 | workplace learning* [tiab] OR (workplace* [ti] AND learning* [ti]) OR (workplace* [ot] AND learning* [ot])                | DE "workplace learning" OR TI (workplace* AND learning*) OR AB ("workplace learning*")                    | TI (workplace* AND learning*) OR AB ("workplace learning*")                                               |

|     |                                                                                                                                                            |                                                                                      |                                                                                                      |
|-----|------------------------------------------------------------------------------------------------------------------------------------------------------------|--------------------------------------------------------------------------------------|------------------------------------------------------------------------------------------------------|
| #26 | learning in the workplace*[tiab] OR (learning*[ti] AND workplace*[ti]) OR (learning*[ot] AND workplace*[ot])                                               | TI (learning* AND "in the workplace*") OR AB ("learning in the workplace*")          | TI (learning* AND "in the workplace*") OR AB ("learning in the workplace*")                          |
| #27 | work based learning*[tiab] OR (work based*[ti] AND learning*[ti]) OR (work based*[ot] AND learning*[ot])                                                   | TI ("work based*" AND learning*) OR AB ("work based learning*")                      | TI ("work based*" AND learning*) OR AB ("work based learning*")                                      |
| #28 | work integrated learning*[tiab] OR (work integrated*[ti] AND learning*[ti]) OR (work integrated*[ot] AND learning*[ot])                                    | TI ("work integrated*" AND learning*) OR AB ("work integrated learning*")            | TI ("work integrated*" AND learning*) OR AB ("work integrated learning*")                            |
| #29 | learning process*[tiab]                                                                                                                                    | DE "Learning Processes" OR TI ("learning process*") OR AB ("learning process*")      | TI ("learning process*") OR AB ("learning process*")                                                 |
| #30 | "learning the practice of nursing"[tiab]                                                                                                                   | TI ("learning the practice of nursing*") OR AB ("learning the practice of nursing*") | TI ("learning the practice of nursing*") OR AB ("learning the practice of nursing*")                 |
| #31 | (learning*[tiab] AND clinical nursing*[tiab])                                                                                                              | TI (learning* AND "clinical nursing*") OR AB ("learning clinical nursing*")          | TI (learning* AND "clinical nursing*") OR AB ("learning clinical nursing*")                          |
| #32 | placement learning*[tiab] OR (placement*[ti] AND learning*[ti]) OR (placement*[ot] AND learning*[ot])                                                      | TI (placement* AND learning*) OR AB ("placement learning*")                          | TI (placement* AND learning*) OR AB ("placement learning*")                                          |
| #33 | "Self-Directed Learning as Topic"[Mesh] OR self directed learning*[tiab] OR (self directed[ti] AND learning*[ti]) OR (self directed[ot] AND learning*[ot]) | TI ("self directed*" AND learning*) OR AB ("self directed learning*")                | MH "Self directed learning" OR TI ("self directed*" AND learning*) OR AB ("self directed learning*") |
| #34 | self regulated learning*[tiab] OR (self regulated [ti] AND learning*[ti]) OR (self regulated [ot] AND learning*[ot])                                       | TI ("self regulated*" AND learning*) OR AB ("self regulated learning*")              | TI ("self regulated*" AND learning*) OR AB ("self regulated learning*")                              |
| #35 | situated learning*[tiab] OR (situated*[ti] AND learning*[ti]) OR (situated*[ot] AND learning*[ot])                                                         | TI (situated* AND learning*) OR AB ("situated learning*")                            | TI (situated* AND learning*) OR AB ("situated learning*")                                            |
| #36 | socialisation*[tiab]                                                                                                                                       | TI (socialisation*) OR AB ("socialisation*")                                         | TI (socialisation*) OR AB ("socialisation*")                                                         |
| #37 | socialization*[tiab]                                                                                                                                       | TI (socialization*) OR AB ("socialization*")                                         | TI (socialization*) OR AB ("socialization*")                                                         |
| #38 | student learning*[tiab]                                                                                                                                    | TI ("student learning*") OR AB ("student learning*")                                 | TI ("student learning*") OR AB ("student learning*")                                                 |
| #39 | ward based learning*[tiab] OR (ward based*[ti] AND learning*[ti]) OR (ward based*[ot] AND learning*[ot])                                                   | TI ("ward based" AND learning*) OR AB ("ward based learning*")                       | TI ("ward based" AND learning*) OR AB ("ward based learning*")                                       |

|  |                               |  |  |
|--|-------------------------------|--|--|
|  | based*[ot] AND learning*[ot]) |  |  |
|--|-------------------------------|--|--|

During the search and selection process, three concepts appeared in the literature that had been discarded before, but were added to the list of concepts to run the second search with after discussion in the research team. The total number of hits was calculated after this search.

| Concept | PubMed                                                                                                                 | Ebsco/ERIC                                                                  | Ebsco/CINAHL                                                                |
|---------|------------------------------------------------------------------------------------------------------------------------|-----------------------------------------------------------------------------|-----------------------------------------------------------------------------|
| #40     | (peer learning*[tiab]) OR (peer*[ti] AND learning*[ti]) OR (peer*[ot] AND learning*[ot])                               | TI ("peer*" AND learning*) OR AB ("peer learning*")                         | TI ("peer*" AND learning*) OR AB ("peer learning*")                         |
| #41     | Peer assisted*[tiab] OR (peer assisted*[ti] AND learning*[ti]) OR (peer assisted*[ot] AND learning*[ot])               | TI ("peer assisted*" AND learning*) OR AB ("peer assisted based learning*") | TI ("peer assisted*" AND learning*) OR AB ("peer assisted based learning*") |
| #42     | (transformative learning*[tiab] OR (transformative*[ti] AND learning*[ti]) OR (transformative*[ot] AND learning*[ot])) | TI (transformative* AND learning*) OR AB ("transformative learning*")       | TI (transformative* AND learning*) OR AB ("transformative learning*")       |

## 2.2 Number of hits per concept

|     | Concepts                                                                                                                                                                                   | Combination of searches with # from queries in the above table | PubMed (23 May 2018) | Ebsco/-ERIC (23 May 2018) | Ebsco/-CINAHL (23 May 2018) |
|-----|--------------------------------------------------------------------------------------------------------------------------------------------------------------------------------------------|----------------------------------------------------------------|----------------------|---------------------------|-----------------------------|
| 1.  | <b>Authentic learning</b>                                                                                                                                                                  | #1 AND #2                                                      | 32                   | 6                         | 23                          |
| 2.  | <b>Clinical learning/ clinically based learning/ clinical placement learning</b>                                                                                                           | #1 AND (#3 OR #4 OR 5)                                         | 631                  | 16                        | 544                         |
| 3.  | <b>Experiential learning</b>                                                                                                                                                               | #1 AND #6                                                      | 294                  | 84                        | 571                         |
| 4.  | <b>Experimental learning</b>                                                                                                                                                               | #1 AND #7                                                      | 31                   | 2                         | 26                          |
| 5.  | <b>Hidden curriculum</b>                                                                                                                                                                   | #1 AND # 8                                                     | 26                   | 1                         | 18                          |
| 6.  | <b>Informal learning</b>                                                                                                                                                                   | #1 AND #9                                                      | 11                   | 7                         | 7                           |
| 7.  | <b>Learning by doing</b>                                                                                                                                                                   | #1 AND #10                                                     | 12                   | 3                         | 14                          |
| 8.  | <b>Learning clinical nursing/ learning the practice of nursing</b>                                                                                                                         | #1 AND (#30 OR #31)                                            | 205                  | 0                         | 31                          |
| 9.  | <b>Learning from/through experience/learning from clinical placement experience</b>                                                                                                        | #1 AND (#11 OR #12 OR 13)                                      | 48                   | 7                         | 4                           |
| 10. | <b>Learning in the clinical field/learning in the clinical context/ Learning in the clinical setting/Learning in the clinical nursing environment/learning in the clinical environment</b> | #1 AND (#19 OR #20 OR #21 OR #22 OR #23)                       | 785                  | 16                        | 240                         |
| 11. | <b>Learning on the job</b>                                                                                                                                                                 | #1 AND #24                                                     | 0                    | 2                         | 2                           |

|     |                                                                                                                                                                                              |                                          |      |    |     |
|-----|----------------------------------------------------------------------------------------------------------------------------------------------------------------------------------------------|------------------------------------------|------|----|-----|
| 12. | <b>Learning process</b>                                                                                                                                                                      | #1 AND #29                               | 463  | 40 | 474 |
| 13. | <b>Learning in practice/learning from practice/ learning in practice environment/learning in practice setting/learning in a clinical practicum/practice learning/practice based learning</b> | #1 AND (#14 OR #15 OR #16 OR #17 OR #18) | 176  | 10 | 205 |
| 14. | <b>Placement learning</b>                                                                                                                                                                    | #1 AND #32                               | 102  | 4  | 64  |
| 15. | <b>Practice based learning</b>                                                                                                                                                               |                                          |      |    |     |
| 16. | <b>Self directed learning</b>                                                                                                                                                                | #1 AND #33                               | 1210 | 20 | 297 |
| 17. | <b>Self-regulated learning</b>                                                                                                                                                               | #1 AND #34                               | 27   | 2  | 32  |
| 18. | <b>Situated learning</b>                                                                                                                                                                     | #1 AND #35                               | 25   | 4  | 17  |
| 19. | <b>Socialisation/socialisation</b>                                                                                                                                                           | #1 AND (#36 OR #37)                      | 380  | 35 | 372 |
| 20. | <b>Student learning</b>                                                                                                                                                                      | #1 AND #38                               | 543  | 66 | 663 |
| 21. | <b>Ward based learning</b>                                                                                                                                                                   | #1 AND #39                               | 0    | 1  | 2   |
| 22. | <b>Workplace learning/learning in the workplace/work based learning/work integrated learning</b>                                                                                             | #1 AND (#25 OR #26 OR #27 OR #28)        | 92   | 5  | 67  |
| 23. | <b>Peer learning*</b>                                                                                                                                                                        | #1 AND #40                               | 106  | 4  | 31  |
| 24. | <b>Peer assisted learning*</b>                                                                                                                                                               | #1 AND #41                               | 23   | 0  | 3   |
| 25. | <b>Transformative learning*</b>                                                                                                                                                              | #1 AND #42                               | 60   | 17 | 19  |

\* Search 23, 24 and 25 have been conducted on 16 september 2018.

Supplementary file 4. List of potentially eligible concepts and their reason for inclusion/exclusion in the second search step after discussion.

|                                          | Inclusion? | Rationale                                                                                                           |
|------------------------------------------|------------|---------------------------------------------------------------------------------------------------------------------|
| Active learning                          | no         | Used exclusively for learning in the classroom setting                                                              |
| Authentic learning                       | yes        | Is used as an equivalent to learning in clinical practice <sup>1</sup>                                              |
| Blended learning                         | No         | Used exclusively for learning in the classroom setting                                                              |
| case based learning                      | no         | Used exclusively for learning in the classroom setting, simulation learning or online learning                      |
| clinical experience/ practice experience | no         | Used to describe the overall experience of being in a clinical setting rather than the learning process             |
| clinical learning                        | yes        | Used as an equivalent to learning in clinical practice                                                              |
| clinical learning environment            | no         | Used to describe learning circumstances rather than the learning process itself                                     |
| clinical learning model                  | no         | Used to describe learning circumstances rather than the learning process itself                                     |
| Clinical nursing education               | no         | Is used to describe the entire system (organization, supervision, contents etc. ) within which learning takes place |
| clinical placement learning              | yes        | Used as an equivalent to learning in clinical practice                                                              |
| clinical skills learning                 | no         | Used to describe a specific part (ie skills learning) of learning in clinical practice                              |
| clinically based learning                | yes        | Used as an equivalent to learning in clinical practice                                                              |
| Collaborative learning                   | no         | Used to describe a specific way of organizing learning in clinical practice (ie learning in pairs)                  |
| concept-based learning                   | no         | Used either for curriculum design or for specific learning activities in clinical practice                          |
| cooperative learning                     | No         | Used to describing specific learning/ teaching activities                                                           |
| deep learning                            | no         | Used exclusively for learning in the classroom setting, simulation learning or online learning                      |
| Deliberate practice                      | No         | Used to describing specific learning/ teaching activities                                                           |
| Didactic learning                        | No         | Used exclusively for learning in the classroom setting                                                              |
| dual level learning                      | No         | Used to describe a specific way of organizing classroom learning                                                    |
| empathy learning                         | no         | Used to describe the learning of a specific skill (ie empathy)                                                      |
| Enquiry based learning                   | no         | Used to describing specific learning/ teaching activities                                                           |
| Experiential learning                    | yes        | Is as an equivalent to learning in clinical practice                                                                |
| Experimental learning                    | yes        | Is as an equivalent to learning in clinical practice                                                                |
| Hidden curriculum                        | yes        | Although this is not an equivalent to learning in practice, we decided to include this concept as it is used to     |

|                                                                                                                                                                                     |     |                                                                                                                                    |
|-------------------------------------------------------------------------------------------------------------------------------------------------------------------------------------|-----|------------------------------------------------------------------------------------------------------------------------------------|
|                                                                                                                                                                                     |     | describe a way in which knowledge and valued are transmitted in clinical practice outside specific teaching or learning activities |
| Informal learning                                                                                                                                                                   | yes | Is used as an equivalent to learning in clinical practice                                                                          |
| (Work) integrated learning                                                                                                                                                          | yes | Is (in some cases) <sup>2</sup> used as an equivalent to learning in practice                                                      |
| Integrative learning                                                                                                                                                                | No  | Used for describing specific teaching and learning strategies                                                                      |
| Intentional learning                                                                                                                                                                | no  | Used to describe specific learning/ teaching activities <sup>3</sup> or competencies <sup>4</sup>                                  |
| interprofessional learning                                                                                                                                                          | no  | Used to describe a specific way of organizing learning in clinical practice (ie learning with and from other disciplines)          |
| Learning by doing                                                                                                                                                                   | yes | Used as an equivalent to learning in clinical practice                                                                             |
| learning clinical nursing                                                                                                                                                           | yes | Used as an equivalent to learning in clinical practice                                                                             |
| learning from/through experience                                                                                                                                                    | yes | Used as an equivalent to learning in clinical practice                                                                             |
| learning from clinical placement experience                                                                                                                                         | yes | Used as an equivalent to learning in clinical practice                                                                             |
| learning from practice                                                                                                                                                              | yes | Used as an equivalent to learning in clinical practice                                                                             |
| learning in a clinical environment                                                                                                                                                  | yes | Used as an equivalent to learning in clinical practice                                                                             |
| learning in practice/ learning in practice environment/ learning in practice setting/learning in a clinical practicum                                                               | yes | Used as an equivalent to learning in clinical practice                                                                             |
| Learning in the clinical field/learning in the clinical context/ Learning in the clinical setting/Learning in the clinical nursing environment/learning in the clinical environment | yes | Used as an equivalent to learning in clinical practice                                                                             |
| learning in the practice setting                                                                                                                                                    | yes | Used as an equivalent to learning in clinical practice                                                                             |
| Learning on the job                                                                                                                                                                 | yes | Used as an equivalent to learning in clinical practice                                                                             |
| Learning on the workplace/ workplace learning/learning in the workplace                                                                                                             | yes | Used as an equivalent to learning in clinical practice                                                                             |
| learning process                                                                                                                                                                    | yes | Used as an equivalent to learning in clinical practice <sup>5</sup>                                                                |
| Learning situation                                                                                                                                                                  | no  | Used to describe learning circumstances rather than the learning process itself                                                    |
| learning the practice of nursing                                                                                                                                                    | yes | Used as an equivalent to learning in clinical practice <sup>6</sup>                                                                |
| learning through experience                                                                                                                                                         | yes | Used as an equivalent to learning in clinical practice                                                                             |
| learning trajectories                                                                                                                                                               | no  | Used to describe learning in a specific program <sup>7</sup>                                                                       |
| Meaningful learning                                                                                                                                                                 | no  | Used exclusively for learning in the classroom setting <sup>8</sup> or simulation learning <sup>9</sup>                            |
| Online learning                                                                                                                                                                     | no  | Used for specific learning activities outside the clinical                                                                         |

|                                                            |                  |                                                                                                                                                                                                 |
|------------------------------------------------------------|------------------|-------------------------------------------------------------------------------------------------------------------------------------------------------------------------------------------------|
|                                                            |                  | setting                                                                                                                                                                                         |
| Peer based learning/ peer learning/ peer assisted learning | yes <sup>1</sup> | Used to describe a specific central way learning in clinical practice                                                                                                                           |
| Perceptual learning                                        | no               | Used to describe a specific technique to learn in clinical practice                                                                                                                             |
| placement learning                                         | Yes              | Used as an equivalent to learning in clinical practice                                                                                                                                          |
| Practice learning                                          | Yes              | Used as an equivalent to learning in clinical practice                                                                                                                                          |
| Practice-based learning                                    | Yes              | Used as an equivalent to learning in clinical practice                                                                                                                                          |
| problem-based learning/ problem based learning             | no               | Used exclusively for learning in the classroom setting, simulation learning or online learning                                                                                                  |
| professional development                                   | No               | Used to describe the result of learning in the clinical setting, rather than the process                                                                                                        |
| Reflective learning                                        | No               | Used to describe specific teaching and learning strategies                                                                                                                                      |
| Self-directed learning                                     | yes              | Used (at least in some studies, eg <sup>10</sup> ) to describe a very important component of learning in the clinical setting, that is, the part that takes place at the learner's initiative). |
| Self-regulated learning                                    | yes              | Used (at least in some studies, eg <sup>11</sup> ) to describe a major part of learning in the clinical setting, that is, the part that takes place at the learner's initiative).               |
| Service learning                                           | no               | Used for the particular combination of providing (voluntary) community service and learning in practice                                                                                         |
| Shared learning                                            | No               | Used to describe a specific way of organizing learning in clinical practice (ie learning from and with others)                                                                                  |
| Situated learning                                          | yes              | Used as an equivalent to learning in clinical practice, <sup>12</sup>                                                                                                                           |
| socialisation/ socialization                               | yes              | Used to describe a major part of learning in clinical practice                                                                                                                                  |
| student learning                                           | yes              | Is, in some cases (eg <sup>13</sup> ) used to describe learning in clinical practice)                                                                                                           |
| task-based learning                                        | No               | Used to describe a specific way of organizing learning in clinical practice (ie around tasks <sup>14</sup> )                                                                                    |
| team-based learning                                        | No               | Used exclusively for learning in the classroom setting                                                                                                                                          |
| Transformational learning                                  | No               | Used to describe the result of learning in the clinical setting, rather than the process <sup>15</sup>                                                                                          |
| Transformative learning                                    | yes <sup>2</sup> | Used to describe both process and outcomes of learning <sup>16</sup>                                                                                                                            |
| Ward based learning                                        | Yes              | Used as an equivalent to learning in clinical practice                                                                                                                                          |
| Work-based learning                                        | Yes              | Used as an equivalent to learning in clinical practice                                                                                                                                          |
| work-integrated learning                                   | Yes              | Used as an equivalent to learning in clinical practice                                                                                                                                          |

<sup>1</sup> Excluded in first instance as it appeared to be used to study interventions or specific organizational models. On the basis of results in search step 2, the concept was included in second instance.

<sup>2</sup> Excluded in first instance as it appeared to be used to study classroom learning only. On the basis of results in search step 2, the concept was included in second instance.



|                    |     |                                                        |
|--------------------|-----|--------------------------------------------------------|
| workplace learning | Yes | Used as an equivalent to learning in clinical practice |
|--------------------|-----|--------------------------------------------------------|

For peer review only

## Supplementary file 5. Excluded full text articles and main reason for exclusion

|     |                                                                                                                                                              |
|-----|--------------------------------------------------------------------------------------------------------------------------------------------------------------|
| 1.  | Not been able to retrieve full text of this study                                                                                                            |
| 2.  | Study is about influencing factors, interventions, organizational models, personal characteristics affecting learning instead of the learning process itself |
| 3.  | Study is not about learning/ not possible to separate findings about learning from other findings                                                            |
| 4.  | No original study or review                                                                                                                                  |
| 5.  | Study is incomplete (eg no results)                                                                                                                          |
| 6.  | Study is about a research methodology                                                                                                                        |
| 7.  | Another study within the same project is already included, this study offers no additional findings                                                          |
| 8.  | Study is too specific                                                                                                                                        |
| 9.  | Study is not about clinical practice/ not possible to separate findings about clinical practice from other findings                                          |
| 10. | Study is not about nursing students/not about hospital setting                                                                                               |

|                                                        | 1 | 2 | 3 | 4 | 5 | 6 | 7 | 8 | 9 | 10 |
|--------------------------------------------------------|---|---|---|---|---|---|---|---|---|----|
|                                                        | x |   |   |   |   |   |   |   |   |    |
| Abe (1977)                                             | x |   |   |   |   |   |   |   |   |    |
| Allan, Smith, and O'Driscoll (2011)                    |   | x |   |   |   |   |   |   |   |    |
| Alves and Cogo (2014)                                  |   |   | x |   |   |   |   |   |   |    |
| Andrade Bezerra, Soares Campos, and Da Silveira (2005) | x |   |   |   |   |   |   |   |   |    |
| Arlton and Miercort (1980)                             |   |   |   | x |   |   |   |   |   |    |
| Arrigoni et al. (2017)                                 |   |   |   | x |   |   |   |   |   |    |
| Baldwin, Mills, Birks, and Budden (2014)               |   | x |   |   |   |   |   |   |   |    |
| Barry, Ward, and Walter (2017)                         |   |   |   |   |   | x |   |   |   |    |
| Brackenreg (2004)                                      |   | x |   |   |   |   |   |   |   |    |
| Burnard (1991)                                         |   |   |   | x |   |   |   |   |   |    |
| Burnard (1992)                                         |   |   |   |   |   |   | x |   |   |    |
| Charneia (2007)                                        | x |   |   |   |   |   |   |   |   |    |
| Coetzee (2004)                                         |   |   |   |   |   |   |   | x |   |    |
| Cope, Cuthbertson, and Stoddart (2000)                 |   | x |   |   |   |   |   |   |   |    |
| Corbett (1973)                                         |   | x |   |   |   |   |   |   |   |    |
| Cowman (1998)                                          |   | x |   |   |   |   |   |   |   |    |
| Crouch (1991)                                          |   | x |   |   |   |   |   |   |   |    |
| Cullingford (1991)                                     |   | x |   |   |   |   |   |   |   |    |
| de Jesus, Sena, and Andrade (2014)                     |   |   |   |   |   |   |   |   | x |    |
| de Jesus et al. (2014)                                 |   | x |   |   |   |   |   |   |   |    |
| Durgante Alves and Petersen Cogo (2015)                |   |   | x |   |   |   |   |   |   |    |
| Edwards (2013)                                         |   |   |   |   |   | x |   |   |   |    |
| Egginton (2002)                                        |   | x |   |   |   |   |   |   |   |    |
| Endacott, Scholes, Freeman, and Cooper (2003)          |   | x |   |   |   |   |   |   |   |    |
| Evans (1987)                                           |   |   |   | x |   |   |   |   |   |    |
| Friedman (1981)                                        |   | x |   |   |   |   |   |   |   |    |
| Green and Holloway (1997)                              |   |   |   |   |   | x |   |   |   |    |
| Hauge (1999)                                           |   | x |   |   |   |   |   |   |   |    |
| Hauge (1999)                                           |   | x |   |   |   |   |   |   |   |    |
| Henderson et al. (2018)                                |   | x |   |   |   |   |   |   |   |    |
| Henderson et al. (2018)                                |   | x |   |   |   |   |   |   |   |    |
| Hill (2016)                                            |   |   | x |   |   |   |   |   |   |    |
| Hold, Blake, and Ward (2015)                           |   |   |   |   |   |   |   |   | x |    |
| Holmsen (2010)                                         |   | x |   |   |   |   |   |   |   |    |

|                                                                                           |  |   |   |   |  |  |  |   |  |   |   |
|-------------------------------------------------------------------------------------------|--|---|---|---|--|--|--|---|--|---|---|
| Ironside, McNelis, and Ebright (2014)                                                     |  |   | x |   |  |  |  |   |  |   |   |
| Kosowski (1995)                                                                           |  |   |   |   |  |  |  |   |  | x |   |
| Kuiper (2004)                                                                             |  | x |   |   |  |  |  |   |  |   |   |
| Levett-Jones (2007)                                                                       |  |   |   | x |  |  |  |   |  |   |   |
| Love (1996)                                                                               |  | x |   |   |  |  |  |   |  |   |   |
| MacFarlane and Hart (1995).                                                               |  |   |   |   |  |  |  |   |  | x |   |
| May and Veitch (1998)                                                                     |  | x |   |   |  |  |  |   |  |   |   |
| Montagna, Benaglio, and Zannini (2010)                                                    |  | x |   |   |  |  |  |   |  |   |   |
| More and Conklin (1995)                                                                   |  | x |   |   |  |  |  |   |  |   |   |
| Newton, Billett, and Ockerby (2009)                                                       |  | x |   |   |  |  |  |   |  |   |   |
| Nolan (1998)                                                                              |  |   | x |   |  |  |  |   |  |   |   |
| O'Shea (2003)                                                                             |  |   |   |   |  |  |  |   |  | x |   |
| Paliadelis and Wood (2016)                                                                |  | x |   |   |  |  |  |   |  |   |   |
| Papp, Markkanen, and Von Bonsdorff (2001)                                                 |  | x |   |   |  |  |  |   |  |   |   |
| Polifroni, Packard, Shah, and MacAvoy (1995)                                              |  |   | x |   |  |  |  |   |  |   |   |
| Rajeswaran (2016)                                                                         |  | x |   |   |  |  |  |   |  |   |   |
| Reutter, Field, Campbell, and Day (1997)                                                  |  |   | x |   |  |  |  |   |  |   |   |
| Rodríguez García, Ruiz López, González Sanz, Fernández Trinidad, and De Blas Gómez (2014) |  |   | x |   |  |  |  |   |  |   |   |
| Sandvik et al. (2012)                                                                     |  | x |   |   |  |  |  |   |  |   |   |
| Shahsavari, Zare, Parsa-Yekta, Griffiths, and Vaismoradi (2018)                           |  |   | x |   |  |  |  |   |  |   |   |
| Shin (2000)                                                                               |  |   | x |   |  |  |  |   |  |   | x |
| Shirazi, Sharif, Molazem, and Alborzi (2017)                                              |  |   |   |   |  |  |  |   |  | x |   |
| Skaalvik, Normann, and Henriksen (2010)                                                   |  | x |   |   |  |  |  |   |  |   |   |
| Smith and Morrison (2006).                                                                |  |   |   |   |  |  |  |   |  |   | x |
| Spouse (2001)                                                                             |  |   | x |   |  |  |  |   |  |   |   |
| Tagliareni (1991)                                                                         |  | x |   |   |  |  |  |   |  |   |   |
| Thrysoe, Hounsgaard, Dohn, and Wagner (2010).                                             |  |   | x |   |  |  |  |   |  |   |   |
| Tupala, Tossavainen, and Turunen (2004)                                                   |  |   |   |   |  |  |  |   |  |   | x |
| Vesanto and Munnukka (1996)                                                               |  | x |   |   |  |  |  |   |  |   |   |
| Wilson (1994)                                                                             |  |   | x |   |  |  |  |   |  |   |   |
| Wong and Lee (2000)                                                                       |  |   |   |   |  |  |  |   |  |   | x |
| Zhao, Kuan, Chung, Chan, and Li (2018).                                                   |  |   |   |   |  |  |  | x |  |   |   |

- Abe, Y. (1977). [The nursing student in the hospital ward--her activities and learning process]. *Kango Tenbo*, 2(10), 18-22.
- Allan, H. T., Smith, P., & O'Driscoll, M. (2011). Experiences of supernumerary status and the hidden curriculum in nursing: a new twist in the theory-practice gap? *J Clin Nurs*, 20(5-6), 847-855. doi:10.1111/j.1365-2702.2010.03570.x
- Alves, E. A., & Cogo, A. L. (2014). [Nursing students' perception of the learning process in a hospital setting]. *Rev Gaucha Enferm*, 35(1), 102-109.
- Andrade Bezerra, M. G., Soares Campos, A. D., & Da Silveira, I. P. (2005). Teaching learning: critical view of nursing undergraduate students. *Enfermagem Atual*, 5(25), 23-26.
- Arlton, D. M., & Miercort, O. S. (1980). A nursing clinic: the challenge for student learning opportunities. *J Nurs Educ*, 19(1), 53-58.
- Arrigoni, C., Grugnetti, A. M., Caruso, R., Gallotti, M. L., Borrelli, P., & Puci, M. (2017). Nursing students' clinical competencies: a survey on clinical education objectives. *Ann Ig*, 29(3), 179-188. doi:10.7416/ai.2017.2145

- 1  
2  
3 Baldwin, A., Mills, J., Birks, M., & Budden, L. (2014). Role modeling in undergraduate nursing  
4 education: an integrative literature review. *Nurse Educ Today*, 34(6), e18-26.  
5 doi:10.1016/j.nedt.2013.12.007  
6  
7 Barry, S., Ward, L., & Walter, R. (2017). Exploring Nursing Students' Experiences of Learning Using  
8 Phenomenography: A Literature Review. *J Nurs Educ*, 56(10), 591-598.  
9 doi:10.3928/01484834-20170918-03  
10  
11 Brackenreg, J. (2004). Issues in reflection and debriefing: how nurse educators structure experiential  
12 activities. *Nurse Educ Pract*, 4(4), 264-270. doi:10.1016/j.nepr.2004.01.005  
13  
14 Burnard, P. (1991). Perceptions of experiential learning. *Nurs Times*, 87(8), 47.  
15  
16 Burnard, P. (1992). Defining experiential learning: nurse tutors' perceptions. *Nurse Educ Today*, 12(1),  
17 29-36.  
18  
19 Charneia, E. (2007). Nursing students' perceptions of role modeling as it relates to learning in the  
20 clinical environment. *Ph.D.*, 307 p-307 p.  
21  
22 Coetzee, M. (2004). Learning to nurse children: towards a model for nursing students. *J Adv Nurs*,  
23 47(6), 639-648. doi:10.1111/j.1365-2648.2004.03152.x  
24  
25 Cope, P., Cuthbertson, P., & Stoddart, B. (2000). Situated learning in the practice placement. *J Adv*  
26 *Nurs*, 31(4), 850-856.  
27  
28 Corbett, D. (1973). Student nurses share in clinical learning. *Can Nurse*, 69(11), 21.  
29  
30 Cowman, S. (1998). The approaches to learning of student nurses in the Republic of Ireland and  
31 Northern Ireland. *J Adv Nurs*, 28(4), 899-910.  
32  
33 Crouch, S. (1991). The value of clinical learning. *Nursing (Lond)*, 4(32), 9-11.  
34  
35 Cullingford, S. (1991). Learning from experience. *Senior Nurse*, 11(6), 25-28.  
36  
37 de Jesus, I. S., Sena, E. L., & Andrade, L. M. (2014). Learning in the informal spaces and re-signification  
38 of the existence of undergraduate students of nursing. *Rev Lat Am Enfermagem*, 22(5), 731-  
39 738.  
40  
41 Durgante Alves, E. A. T., & Petersen Cogo, A. L. (2015). NURSING STUDENTS' PERCEPTION OF THE  
42 LEARNING PROCESS IN A HOSPITAL SETTING. *Rev Gaucha Enferm*, 36(1), 102-109.  
43 doi:10.1590/1983-1447.2014.01.42870  
44  
45 Edwards, S. L. (2013). Learning from Practice: the Value of Story in Nurse Education. *Ph.D.*, N.PAG p-  
46 N.PAG p.  
47  
48 Egginton, D. (2002). Learning from experience: a first-year student reflects. *Paediatr Nurs*, 14(10), 30-  
49 31.  
50  
51 Endacott, R., Scholes, J., Freeman, M., & Cooper, S. (2003). The reality of clinical learning in critical  
52 care settings: a practitioner:student gap? *J Clin Nurs*, 12(5), 778-785.  
53  
54 Evans, N. (1987). Quest: Learning from experience. *Nurs Times*, 83(42), 49-50.  
55  
56 Friedman, F. B. (1981). Learning by doing. *J Pract Nurs*, 31(6), 20-23.  
57  
58 Green, A. J., & Holloway, D. G. (1997). Using a phenomenological research technique to examine  
59 student nurses' understandings of experiential teaching and learning: a critical review of  
60 methodological issues. *J Adv Nurs*, 26(5), 1013-1019.  
61  
62 Hauge, K. W. (1999). To perceive and to be perceived. *Nordic Journal of Nursing Research & Clinical*  
63 *Studies / Vård i Norden*, 19(2), 37-41.  
64  
65 Henderson, A., Harrison, P., Rowe, J., Edwards, S., Barnes, M., Henderson, S., & Henderson, A. (2018).  
66 Students take the lead for learning in practice: A process for building self-efficacy into  
67 undergraduate nursing education. *Nurse Educ Pract*, 31, 14-19.  
68 doi:10.1016/j.nepr.2018.04.003  
69  
70 Hill, L. A. (2016). Telling their stories: Using Appreciative Inquiry to explore the lived experience of  
71 students in clinical nursing education. *Telling Their Stories: Using Appreciative Inquiry to*  
72 *Explore the Lived Experience of Students in Clinical Nursing Education*, 1-1.  
73  
74 Hold, J. L., Blake, B. J., & Ward, E. N. (2015). Perceptions and experiences of nursing students enrolled  
75 in a palliative and end-of-life nursing elective: A qualitative study. *Nurse Educ Today*, 35(6),  
76 777-781. doi:10.1016/j.nedt.2015.02.011

- 1  
2  
3 Holmsen, T. L. (2010). Influences on nursing students' confidence and learning in clinical practice. *Nordic Journal of Nursing Research & Clinical Studies / Vård i Norden*, 30(1), 24-28.
- 4 Ironside, P. M., McNelis, A. M., & Ebright, P. (2014). Clinical education in nursing: rethinking learning  
5 in practice settings. *Nurs Outlook*, 62(3), 185-191. doi:10.1016/j.outlook.2013.12.004
- 6  
7 Kosowski, M. M. (1995). Clinical learning experiences and professional nurse caring: a critical  
8 phenomenological study of female baccalaureate nursing students. *J Nurs Educ*, 34(5), 235-  
9 242.
- 10  
11 Kuiper, R. A. (2004). Nursing reflections from journaling during a perioperative internship. *Aorn j*,  
12 79(1), 195-198, 201-196, 209-112 passim.
- 13 Levett-Jones, T. L. (2007). Facilitating reflective practice and self-assessment of competence through  
14 the use of narratives. *Nurse Educ Pract*, 7(2), 112-119. doi:10.1016/j.nepr.2006.10.002
- 15 Love, C. (1996). Using a diary to learn the patient's perspective. *Prof Nurse*, 11(5), 286-288.
- 16 MacFarlane, E., & Hart, J. D. (1995). Self-directed learning experiences for senior BScN students. *Can*  
17 *Nurse*, 91(10), 17.
- 18  
19 May, N., & Veitch, L. (1998). Working to learn and learning to work: placement experience of Project  
20 2000 nursing students in Scotland. *Nurse Educ Today*, 18(8), 630-636.
- 21 Montagna, L., Benaglio, C., & Zannini, L. (2010). [Reflective writing in nursing education: background,  
22 experiences and methods]. *Assist Inferm Ric*, 29(3), 140-152.
- 23 More, P., & Conklin, J. (1995). Investigating student learning: the Katz-Henry model. *J Nurs Educ*,  
24 34(3), 143-144.
- 25 Newton, J. M., Billett, S., & Ockerby, C. M. (2009). Journeying through clinical placements--an  
26 examination of six student cases. *Nurse Educ Today*, 29(6), 630-634.  
27 doi:10.1016/j.nedt.2009.01.009
- 28  
29 Nolan, C. A. (1998). Learning on clinical placement: the experience of six Australian student nurses.  
30 *Nurse Educ Today*, 18(8), 622-629.
- 31 O'Shea, E. (2003). Self-directed learning in nurse education: a review of the literature. *J Adv Nurs*,  
32 43(1), 62-70.
- 33 Paliadelis, P., & Wood, P. (2016). Learning from clinical placement experience: Analysing nursing  
34 students' final reflections in a digital storytelling activity. *Nurse Educ Pract*, 20, 39-44.  
35 doi:10.1016/j.nepr.2016.06.005
- 36  
37 Papp, I., Markkanen, M., & Von Bonsdorff, M. (2001). Student, teacher, mentor -- student nurses  
38 learning experiences in clinical practice. *Sairaanhoidaja*, 74(8), 26-29.
- 39 Polifroni, E. C., Packard, S. A., Shah, H. S., & MacAvoy, S. (1995). Activities and interactions of  
40 baccalaureate nursing students in clinical practica. *J Prof Nurs*, 11(3), 161-169.
- 41 Rajeswaran, L. (2016). Clinical Experiences of Nursing Students at a Selected Institute of Health  
42 Sciences in Botswana. *Health Science Journal*, 10(6), 1-6. doi:10.21767/1791-809X.1000471
- 43 Reutter, L., Field, P. A., Campbell, I. E., & Day, R. (1997). Socialization into nursing: nursing students  
44 as learners. *J Nurs Educ*, 36(4), 149-155.
- 45 Rodríguez García, M., Ruiz López, M., González Sanz, P., Fernández Trinidad, M., & De Blas Gómez, I.  
46 (2014). Life experiences of the student nursing 4th in the practicum. *Cultura de los Cuidados*,  
47 18(38), 25-33.
- 48  
49 Sandvik, A.-H., Melender, H.-L., Jonsén, E., Jönsson, G., Salmu, M., & Hilli, Y. (2012). Nursing  
50 students'experiences of the first clinical education-a nordic quantitative study. *Nordic Journal*  
51 *of Nursing Research & Clinical Studies / Vård i Norden*, 32(3), 20-25.
- 52 Shahsavari, H., Zare, Z., Parsa-Yekta, Z., Griffiths, P., & Vaismoradi, M. (2018). Learning Situations in  
53 Nursing Education: A Concept Analysis. *Res Theory Nurs Pract*, 32(1), 23-45.  
54 doi:10.1891/0000-000y.32.1.23
- 55  
56 Shin, K. R. (2000). The meaning of the clinical learning experience in Korean nursing students. *Journal*  
57 *of Nursing Education*, 39(6), 259-265.
- 58 Shirazi, F., Sharif, F., Molazem, Z., & Alborzi, M. (2017). Dynamics of self-directed learning in M.Sc.  
59 nursing students: A qualitative research. *J Adv Med Educ Prof*, 5(1), 33-41.
- 60

- 1  
2  
3 Skaalvik, M. W., Normann, H. K., & Henriksen, N. (2010). To what extent does the oral shift report  
4 stimulate learning among nursing students? A qualitative study\*. *J Clin Nurs*, *19*(15-16),  
5 2300-2308. doi:10.1111/j.1365-2702.2010.03217.x  
6 Smith, P., & Morrison, J. (2006). Clinical clerkships: students can structure their own learning. *Med*  
7 *Educ*, *40*(9), 884-892. doi:10.1111/j.1365-2929.2006.02546.x  
8 Spouse, J. (2001). Workplace learning: pre-registration nursing students' perspectives. *Nurse Educ*  
9 *Pract*, *1*(3), 149-156. doi:10.1054/nepr.2001.0024  
10 Tagliareni, E. (1991). What and how of student learning activities. *NLN Publ*(15-2411), 65-91.  
11 Thrysoe, L., Hounsgaard, L., Dohn, N. B., & Wagner, L. (2010). Participating in a community of  
12 practice as a prerequisite for becoming a nurse - Trajectories as final year nursing students.  
13 *Nurse Educ Pract*, *10*(6), 361-366. doi:10.1016/j.nepr.2010.05.004  
14 Tupala, M., Tossavainen, K., & Turunen, H. (2004). PHN students' target levels of competencies in  
15 children and adolescents' nursing. *Hoitotiede*, *16*(3), [98]-110.  
16 Vesanto, A., & Munnukka, T. (1996). Work as student primary nurse in promoting professional skills  
17 of student nurses. *Hoitotiede*, *8*(1), 20-28.  
18 Wilson, M. E. (1994). Nursing student perspective of learning in a clinical setting. *J Nurs Educ*, *33*(2),  
19 81-86.  
20 Wong, F. K. Y., & Lee, W. M. (2000). A phenomenological study of early nursing experiences in Hong  
21 Kong. *J Adv Nurs*, *31*(6), 1509-1517. doi:10.1046/j.1365-2648.2000.01433.x  
22 Zhao, Y., Kuan, H. K., Chung, J. O. K., Chan, C. K. Y., & Li, W. H. C. (2018). Students' approaches to  
23 learning in a clinical practicum: A psychometric evaluation based on item response theory.  
24 *Nurse Educ Today*, *66*, 179-186. doi:10.1016/j.nedt.2018.04.015  
25  
26  
27  
28  
29  
30  
31  
32  
33  
34  
35  
36  
37  
38  
39  
40  
41  
42  
43  
44  
45  
46  
47  
48  
49  
50  
51  
52  
53  
54  
55  
56  
57  
58  
59  
60

# BMJ Open

## How do undergraduate nursing students learn in the hospital setting? A scoping review of conceptualisations, operationalisations and learning activities.

|                                 |                                                                                                                                                                                                                                                                                                                                                                                                                                                                                                                                                                                                                                                                                                                                                                                                                                                                                                                                     |
|---------------------------------|-------------------------------------------------------------------------------------------------------------------------------------------------------------------------------------------------------------------------------------------------------------------------------------------------------------------------------------------------------------------------------------------------------------------------------------------------------------------------------------------------------------------------------------------------------------------------------------------------------------------------------------------------------------------------------------------------------------------------------------------------------------------------------------------------------------------------------------------------------------------------------------------------------------------------------------|
| Journal:                        | <i>BMJ Open</i>                                                                                                                                                                                                                                                                                                                                                                                                                                                                                                                                                                                                                                                                                                                                                                                                                                                                                                                     |
| Manuscript ID                   | bmjopen-2019-029397.R2                                                                                                                                                                                                                                                                                                                                                                                                                                                                                                                                                                                                                                                                                                                                                                                                                                                                                                              |
| Article Type:                   | Original research                                                                                                                                                                                                                                                                                                                                                                                                                                                                                                                                                                                                                                                                                                                                                                                                                                                                                                                   |
| Date Submitted by the Author:   | 02-Oct-2019                                                                                                                                                                                                                                                                                                                                                                                                                                                                                                                                                                                                                                                                                                                                                                                                                                                                                                                         |
| Complete List of Authors:       | Stoffels, Malou; Amsterdam UMC, Vrije Universiteit Amsterdam, Medical Faculty, Department of Research in Education; Amsterdam UMC, Vrije Universiteit Amsterdam, Amstel Academie<br>Peerdeman, Saskia; Amsterdam UMC, Vrije Universiteit Amsterdam, Medical Faculty, Department of Research in Education; Amsterdam UMC, Vrije Universiteit Amsterdam, Department of Neurosurgery<br>Daelmans, Hester; Amsterdam UMC, Vrije Universiteit Amsterdam, Medical Faculty, Department of Research in Education; Amsterdam UMC, Vrije Universiteit Amsterdam, Medical Faculty, Department of Skills Training<br>Ket, J.C.F. ; Amsterdam UMC, Vrije Universiteit Amsterdam, Medical Library<br>Kusurkar, Rashmi; Amsterdam UMC, Vrije Universiteit Amsterdam, Medical Faculty, Department of Research in Education; Vrije Universiteit Amsterdam, Faculty of Psychology and Education, LEARN! Research institute for learning and education |
| <b>Primary Subject Heading</b>: | Nursing                                                                                                                                                                                                                                                                                                                                                                                                                                                                                                                                                                                                                                                                                                                                                                                                                                                                                                                             |
| Secondary Subject Heading:      | Research methods                                                                                                                                                                                                                                                                                                                                                                                                                                                                                                                                                                                                                                                                                                                                                                                                                                                                                                                    |
| Keywords:                       | Nursing, EDUCATION & TRAINING (see Medical Education & Training), MEDICAL EDUCATION & TRAINING, Clinical learning                                                                                                                                                                                                                                                                                                                                                                                                                                                                                                                                                                                                                                                                                                                                                                                                                   |
|                                 |                                                                                                                                                                                                                                                                                                                                                                                                                                                                                                                                                                                                                                                                                                                                                                                                                                                                                                                                     |

SCHOLARONE™  
Manuscripts

1  
2  
3 **How do undergraduate nursing students learn in the hospital setting? A**  
4 **scoping review of conceptualisations, operationalisations and learning**  
5 **activities.**  
6  
7  
8  
9

10  
11  
12  
13 Malou Stoffels<sup>1,2</sup>; Saskia M. Peerdeman<sup>1,3,4</sup>; Hester E.M. Daelmans<sup>1,5</sup>; Johannes C.F. Ket<sup>6</sup>; Rashmi A.  
14 Kusurkar<sup>1,7</sup>.  
15

16  
17 **Correspondence**  
18

19  
20 Correspondence should be addressed to Malou Stoffels, Amsterdam UMC, Vrije Universiteit  
21 Amsterdam, Department of Research in Education, PO box 7057, 1007 MB Amsterdam, the  
22 Netherlands; telephone: +31204446241; e-mail: m.stoffels@amsterdamumc.nl.  
23  
24

25  
26 <sup>1</sup> Amsterdam UMC, Vrije Universiteit Amsterdam, Medical Faculty, Department of Research in  
27 Education, Amsterdam, the Netherlands  
28

29 <sup>2</sup>Amsterdam UMC, VUmc Amstel Academy, Amsterdam, the Netherlands  
30

31 <sup>3</sup>Amsterdam UMC, Vrije Universiteit Amsterdam, Department of neurosurgery, Amsterdam, the  
32 Netherlands  
33

34 <sup>4</sup> Amsterdam UMC, Univ of Amsterdam, Faculty of Medicine, Amsterdam, the Netherlands  
35

36 <sup>5</sup>Amsterdam UMC, Vrije Universiteit Amsterdam, Medical Faculty, Department of Skills Training,  
37 Amsterdam, the Netherlands  
38

39 <sup>6</sup>Amsterdam UMC, Vrije Universiteit Amsterdam, Medical Library, Amsterdam, the Netherlands  
40

41 <sup>7</sup>Vrije Universiteit Amsterdam, Faculty of Psychology and Education, LEARN! Research Institute for  
42 Learning and Education, Amsterdam, the Netherlands  
43  
44

45  
46  
47 **Word count**  
48

49 4030  
50  
51

52  
53 **Key words**  
54

55 Undergraduate nursing education, learning in practice  
56  
57  
58  
59  
60



## ABSTRACT

**Objectives.** Although clinical learning is pivotal for nursing education, the learning process itself as well as the terminology to address this topic remain underexposed in the literature. This study aimed to examine how concepts equivalent to “learning in practice” are used and operationalised and which learning activities are reported in the nursing education literature. The final aim was to propose terminology for future studies.

**Design** The scoping framework proposed by Arksey and O’Malley was used to answer the research questions and address gaps in the literature. Two systematic searches were conducted in PubMed, EBSCO/ERIC and EBSCO/CINAHL between May and September 2018; first to identify concepts equivalent to ‘learning in practice’ and second to find studies operationalising these concepts. Eligible articles were studies that examined the regular learning of undergraduate nursing students in the hospital setting. Conceptualisations, theoretical frameworks and operationalisations were mapped descriptively. Results relating to how students learn were synthesised using thematic analysis. Quality assessment was performed using the Critical Appraisal Skills Programme (CASP) checklist.

**Results** From 9360 abstracts, 17 articles were included. Five studies adopted a general, yet not explained, synonym for learning in practice, the other approaches focused on the social, unplanned, or active nature of learning. All studies used a qualitative approach. The small number of studies and medium study quality hampered a thorough comparison of concepts. The synthesis of results revealed five types of learning activities, acknowledged by an expert panel, in which autonomy, interactions, and cognitive processing were central themes.

**Conclusions** Both theoretical approaches and learning activities of the current body of research fit into experiential learning theories, which can be used to guide and improve future studies. Gaps in the literature include formal and informal components of learning, the relation between learning and learning outcomes, and the interplay between behaviour and cognitive processing.

## ARTICLE SUMMARY

Strengths and limitations of this study

- This study followed a rigorous design, using an established research framework, a comprehensive two-step search strategy and a well-documented selection process.
- The analysis of both conceptualisations, study quality and study results allowed for the identification of quantitative and qualitative gaps in the literature.

- A limitation is that the literature search only covered undergraduate nursing education in the hospital setting, while a comparison with literature on learning in practice in other health professions would enrichen our understanding of potential conceptualisations.

For peer review only

1  
2  
3  
4  
5  
6  
7  
8  
9  
10  
11  
12  
13  
14  
15  
16  
17  
18  
19  
20  
21  
22  
23  
24  
25  
26  
27  
28  
29  
30  
31  
32  
33  
34  
35  
36  
37  
38  
39  
40  
41  
42  
43  
44  
45  
46  
47  
48  
49  
50  
51  
52  
53  
54  
55  
56  
57  
58  
59  
60

## INTRODUCTION

Learning in the clinical setting is crucial for becoming a competent nurse<sup>1</sup>. However, although a vast body of knowledge exists on factors that influence learning, the process itself remains underexposed in the literature<sup>2</sup>. Understanding learning in the clinical setting can help design, supervise and evaluate individual learning trajectories. In the nursing education literature, just as in other health professions education literature, different terms are used to describe and study learning in clinical practice, with different underlying theoretical or conceptual frameworks.

This study aimed to examine how different concepts equivalent to “learning in practice” are used and operationalised and which learning activities are reported in the nursing education literature. The final aim was to propose a terminology to guide future studies. To our knowledge, the only study that included distinct concepts of clinical learning in the health setting in a review before, was a concept analysis of work-based learning in health care education from 2009<sup>3</sup>. The authors identified common attributes, enabling factors and consequences of workplace learning and proposed a definition. The current review built on this work by critically examining the use of these concepts within the context of undergraduate nursing education and by analysing their outcomes.

To enable comparison of the literature, this study focused on undergraduate students in the general hospital setting. This context is the traditional setting for nursing training and offers a wide array of multidimensional learning opportunities<sup>4</sup> through the presence of different healthcare professionals and students, as well as complex and acute patients. Moreover, this study is limited to undergraduate (also called bachelor, diploma or associate degree) education, which is the initial training that prepares for registration as a nurse, in which students learn the profession and shape their identity. As a final demarcation allowing for the contrasting of concepts, we focused on studies about how students learn during their regular day to day work at the ward, instead of evaluations of specific interventions or models.

## METHODS AND ANALYSIS

The scoping review approach was chosen, as it can help understand complex concepts through clarifying definitions and conceptual boundaries<sup>5</sup> and enables to identify key concepts and gaps in the literature<sup>6</sup>. The approach developed by Arksey and O'Malley<sup>7</sup> and refined by Levac, et al.<sup>8</sup> and the Joanna Briggs institute<sup>9</sup> was used, consisting of the six stages (1) identifying the research question; (2) identifying relevant studies; (3) selecting studies; (4) charting the data; (5) collating, summarising and reporting the results; (6) expert consultation. Reporting on this scoping review followed the PRISMA Extension for Scoping Review checklist<sup>10</sup>, as outlined in supplementary file 1. The review followed an a priori developed research protocol<sup>11</sup> (see supplementary file 2) with a little

1  
2  
3 deviation by choosing the Critical Appraisal Skills Programme (CASP) checklist<sup>12</sup> over the quality  
4 indicators of Buckley et al. <sup>13</sup>, as this allowed for more specific and systematic quality assessment. As  
5 anticipated, study questions and refined inclusion criteria were added during the search process.  
6  
7

### 8 9 **Stage 1. Identifying the research question**

10 The original research question was:

11  
12  
13 “How are different concepts that are used as an equivalent to learning in the hospital setting  
14 operationalised in the undergraduate nursing education literature? .”  
15

16  
17 As scoping is an iterative process<sup>7</sup>, the following research question was added based on the findings  
18 along the search process:  
19

20  
21  
22 “Which activities do undergraduate nursing students learn from in the clinical setting?”  
23  
24

### 25 26 **Stage 2. Identifying relevant studies**

27 As suggested by the Joanna Briggs institute<sup>9</sup>, a comprehensive search strategy was iteratively  
28 developed (by MS and JCFK) following the Peer Review of Electronic Search Strategies (PRESS) 2015  
29 guideline statement<sup>14</sup>, starting with a broad search (search step 1) to inform the subsequent search  
30 strategy (search step 2). The different search queries were first developed for PubMed and later  
31 extended to EBSCO/ERIC and EBSCO/CINAHL. See our search strategy for both steps in  
32 supplementary file 3.  
33  
34  
35  
36

37  
38 In search step 1, from inception to May 2018 the terms ‘learning in clinical practice’ and  
39 ‘undergraduate nursing students’ were combined to identify concepts that are used as an equivalent  
40 to ‘learning in clinical practice’ and that could be included in the second search step. Eligible concepts  
41 were those relating to the process of clinical learning rather than specific aspects of it or associated  
42 factors. The first 200 abstracts were screened by the two reviewers (MS and RAK) independently to  
43 extract potentially eligible concepts. As the two reviewers reached full agreement on potentially  
44 eligible concepts within these first 200 abstracts, the first reviewer screened the rest of the abstracts.  
45 After all abstracts had been screened, all concepts were discussed between the two reviewers and a  
46 final selection of concepts to be included in the second search step was made. Disagreements were  
47 resolved through comparison of the concepts with the inclusion criteria, based on their use within  
48 the abstract. Potentially eligible concepts of which the meaning remained unclear after discussion,  
49 were also added to the list of concepts to be used in search step 2. Other concepts coming up during  
50 the search and selection process that appeared eligible, were added to the selection of concepts  
51  
52  
53  
54  
55  
56  
57  
58  
59  
60

1  
2  
3 after discussion between the reviewers. See supplementary file 4 for concepts and reason for  
4 inclusion/exclusion in the second search step.  
5  
6

7 In search step 2, between May and September 2018 each of the identified concepts was combined  
8 with 'undergraduate nursing students' to find studies operationalising these concepts in the  
9 literature about nursing students' learning in practice. After these two searches, reference lists of  
10 included studies were checked for additional publications meeting inclusion criteria.  
11  
12  
13

### 14 15 Stage 3. Study selection

16 Two researchers (MS and RAK) independently screened abstracts from search step 2 and assessed  
17 the eligibility for full text retrieval. Selected full-text studies were compared between the reviewers  
18 with disagreements being resolved through discussion and consensus and with input from the full  
19 research team.  
20  
21  
22

23  
24 The inclusion criteria were developed iteratively. The initial inclusion criteria were:

- 25 - Original research or reviews in peer reviewed journals that have learning in undergraduate  
26 clinical nursing practice in the hospital setting as one of their main topics, regardless of  
27 publication date and type of article.  
28
- 29 - Studies that examine how students learn in the clinical hospital setting.  
30  
31  
32

33  
34 In line with the aim of the study, the inclusion criteria were refined to:

- 35 - Original research or reviews in peer reviewed journals, regardless of publication date, type of  
36 article and study quality, that examine the learning of undergraduate nursing students in the  
37 clinical hospital setting as it regularly occurs.  
38  
39  
40  
41  
42

43 Resulting in the following exclusion criteria:

44 Studies:

- 45 - evaluating organisational models or interventions
- 46 - about factors influencing learning in clinical practice, including supervision styles, teaching  
47 methods and clinical learning environment
- 48 - outside the general hospital setting
- 49 - about very specific student populations, patient populations or settings (e.g. palliative care)  
50 generating results that might be limited to that setting
- 51 - about interprofessional learning
- 52 - about the acquisition of specific skills  
53  
54  
55  
56  
57  
58  
59  
60

- 1  
2  
3 - about student's 'experience' of clinical learning *without explicit reference to the learning*  
4 *process.*  
5  
6  
7

8 As the study aimed to examine how learning in practice is operationalised in peer-reviewed research,  
9 books, book reviews, commentaries, letters to the editor, PhD theses, and reports were excluded.  
10

#### 11 Stage 4. Charting the data

12 Selected studies were documented including study characteristics (year, country, methodology,  
13 study question, study design, participants, outcomes), conceptualisation of learning in practice  
14 (definitions, theoretical underpinnings/rationale, operationalisations), results, learning activities, and  
15 study quality. Two researchers piloted and refined the data extraction form on the first five studies.  
16 The completed form was discussed in the research team for accuracy and validity. Learning activities  
17 were extracted by two reviewers independently (MS and RAK), the other variables were initially  
18 charted by the first reviewer and checked by the second reviewer. Learning activities were separated  
19 from other study results by going through the result sections of the studies and underlining findings  
20 (themes, observations, quotes) that referred to how nursing students learn in the hospital setting.  
21 When possible, the original wordings were used in the data chart. Colloquial expressions that lost  
22 meaning outside the context of the article, were slightly rephrased. Although formal assessment of  
23 study quality in scoping reviews is debated <sup>6,9</sup>, quality assessment of included studies by the CASP  
24 checklist<sup>12</sup> was decided upon to address qualitative gaps in the literature<sup>8</sup>.  
25  
26  
27  
28  
29  
30  
31  
32  
33  
34  
35

#### 36 Stage 5. Collating, summarising and reporting results

37 Data were analysed in two ways. First, descriptive accounts of concepts, theories, subsequent  
38 operationalisations and study quality were given and compared. Second, a data driven thematic  
39 analysis of learning activities was conducted<sup>15</sup>. These findings were categorised using open coding.  
40 All the results were compared and consolidated through consensus between MS and RAK.  
41  
42  
43  
44

#### 45 Stage 6. Expert consultation

46 In order to confirm our findings, we presented our analysis of the learning activities to four experts of  
47 different institutions in the Netherlands (a senior clinical educator, a coordinator of clinical  
48 education, a head of nursing education department, and a coordinator of nursing education). Short  
49 semi-structured (telephone) interviews were conducted, in which a written summary of the findings  
50 was presented and respondents were asked a) whether they recognised the findings, b) whether  
51 they missed anything, c) whether they had any other comments on the findings.  
52  
53  
54  
55  
56  
57  
58  
59  
60

## Patient and public involvement

As education is essential for improving patient care, patients will eventually benefit from the body of knowledge this study contributes to. However, specific interests of patients have not been investigated. Patients have not been involved in the design or the conduct of the study. The consulted experts can be considered participants of this study, and will be informed about the results as soon as it has been published.

## RESULTS

### Search results

This initial search to identify concepts yielded 7211 abstracts, of which 5658 remained after removing duplicates. As the two reviewers (MS and RAK) reached full agreement on potentially eligible concepts after screening the first 200 abstracts, the remaining abstracts were screened by MS only. Seventy potentially eligible concepts were extracted. After discussion between the reviewers, 22 concepts were selected, to which three concepts were added later in the process, so the second search was run with 25 different concepts. See supplementary file 4 for concepts and reason for inclusion/exclusion in search step 2. The second search, using the 25 concepts selected in the initial search, generated 9360 results of which 5880 remained after duplicates were removed. 83 abstracts were selected for full text reading and 17 studies were included (see supplementary file 5 for excluded full texts and reason for exclusion). Three pairs of studies were based on (partly) overlapping data<sup>16-21</sup>, but were all included as the results only partly overlapped. Reference list screening of the full text articles did not generate any extra results. See Figure 1 For a flow diagram of search step 2.

### General study characteristics

All included studies examined the process of undergraduate nursing students' learning in the clinical setting, as a result of their primary aim or as a significant secondary finding of a broader research question. Six of the studies<sup>18-23</sup> investigated undergraduate nursing students' learning in both the classroom setting and the clinical setting. One of the studies included not only nursing students, but also midwifery and social work students<sup>24</sup>. However, data presentation in the current study is restricted to findings concerning nursing students in the clinical setting. All were primary studies, of which sixteen were qualitative studies, and one mixed methods<sup>21</sup>. Publication year ranged from

1  
2  
3 1987-2018. Studies were conducted in different countries in Europe, Middle East, North America and  
4  
5 Oceania.

### 8 **Study quality**

9  
10 Table 1 shows the quality of the included studies as assessed with the Critical Appraisal Skills  
11 Programme (CASP) tool<sup>12</sup>. In the only mixed method study included<sup>21</sup>, the quantitative data was  
12 analysed only descriptively and was used to inform the qualitative data. Therefore, this study was  
13 also appraised with the CASP. To summarise, in the majority of studies it was unclear how the results  
14 answered the research question, because of a lack of clear aims, lack of clear operationalisation, or  
15 both, in spite of clear descriptions of the process of data analysis and its outcomes.  
16  
17  
18  
19  
20  
21  
22  
23  
24  
25  
26  
27  
28  
29  
30  
31  
32  
33  
34  
35  
36  
37  
38  
39  
40  
41  
42  
43  
44  
45  
46  
47  
48  
49  
50  
51  
52  
53  
54  
55  
56  
57  
58  
59  
60



|                                                                                      | Baraz, et al. <sup>25</sup> | Burnard <sup>20</sup> | Burnard <sup>21</sup> | Carey, et al. <sup>26</sup> | Dadgaran, et al. <sup>27</sup> | Gidman <sup>24</sup> | Grealish and Ranse <sup>28</sup> | Green and Hollo way <sup>22</sup> | Kear <sup>18</sup> | Kear <sup>19</sup> | Manninen <sup>16</sup> | Manninen, et al. <sup>17</sup> | Mays on and Hayward <sup>29</sup> | Rober ts <sup>30</sup> | Seyla ni, et al. <sup>23</sup> | Stock haus en <sup>31</sup> | Winds or <sup>32</sup> |
|--------------------------------------------------------------------------------------|-----------------------------|-----------------------|-----------------------|-----------------------------|--------------------------------|----------------------|----------------------------------|-----------------------------------|--------------------|--------------------|------------------------|--------------------------------|-----------------------------------|------------------------|--------------------------------|-----------------------------|------------------------|
| Was there a clear statement of the aims of the research?                             | yes                         | No                    | yes                   | yes                         | no                             | yes                  | yes                              | No                                | no                 | no                 | no                     | yes                            | yes                               | yes                    | no                             | yes                         | yes                    |
| Is a qualitative methodology appropriate?                                            | yes                         | Yes                   | yes                   | yes                         | yes                            | yes                  | yes                              | yes                               | yes                | yes                | yes                    | yes                            | yes                               | yes                    | yes                            | yes                         | yes                    |
| Was the research design appropriate to address the aims of the research?             | yes                         | can't tell            | yes                   | yes                         | no                             | yes                  | Can't tell                       | Can't tell                        | yes                | Can't tell         | yes                    | yes                            | yes                               | yes                    | no                             | yes                         | yes                    |
| Was the recruitment strategy appropriate to the aims of the research?                | yes                         | can't tell            | yes                   | yes                         | can't tell                     | yes                  | can't tell                       | can't tell                        | yes                | can't tell         | can't tell             | can't tell                     | can't tell                        | can't tell             | yes                            | no                          | no                     |
| Was the data collected in a way that addressed the research issue?                   | yes                         | can't tell            | can't tell            | yes                         | yes                            | can't tell           | yes                              | Can't tell                        | Can't tell         | yes                | Can't tell             | yes                            | yes                               | yes                    | Can't tell                     | yes                         | yes                    |
| Has the relationship between researcher and participants been adequately considered? | no                          | can't tell            | can't tell            | yes                         | no                             | yes                  | yes                              | No                                | no                 | no                 | no                     | can't tell                     | yes                               | can't tell             | no                             | no                          | no                     |
| Have ethical issues been taken into consideration?                                   | yes                         | can't tell            | Can't tell            | yes                         | yes                            | yes                  | can't tell                       | no                                | yes                | can't tell         | can't tell             | yes                            | yes                               | yes                    | yes                            | yes                         | no                     |
| Was the data analysis sufficiently rigorous?                                         | yes                         | Yes                   | yes                   | yes                         | yes                            | yes                  | yes                              | yes                               | yes                | yes                | can't tell             | yes                            | yes                               | can't tell             | yes                            |                             | yes                    |
| Is there a clear statement of findings?                                              | yes                         | Yes                   | No                    | yes                         | no                             | yes                  | yes                              | no                                | yes                | yes                | no                     | yes                            | yes                               | yes                    | yes                            | yes                         | yes                    |

Table 1. quality of the included studies as assessed with the Critical Appraisal Skills Programme (CASP)<sup>12</sup> tool

1  
2  
3  
4  
5  
6  
7  
8  
9  
10  
11  
12  
13  
14  
15  
16  
17  
18  
19  
20  
21  
22  
23  
24  
25  
26  
27  
28  
29  
30  
31  
32  
33  
34  
35  
36  
37  
38  
39  
40  
41  
42  
43  
44  
45  
46

Concepts, operationalisations and learning activities

Table 2 summarises the main concepts, operationalisations, frameworks, findings and learning activities of the 17 selected studies. Findings concerning conceptualisation and operationalisation as well as the results concerning learning activities will be discussed in the following paragraphs.

|                                    | Conceptualisation                                                                                |                                                                                                                                               |                                                                                                      | Operationalisation                                                                    | Learning activities                                                                                            |                                                                                                                                                                                                                                                                                                                                                                                                                                                                                                                                                                                                                                                                                                                            |
|------------------------------------|--------------------------------------------------------------------------------------------------|-----------------------------------------------------------------------------------------------------------------------------------------------|------------------------------------------------------------------------------------------------------|---------------------------------------------------------------------------------------|----------------------------------------------------------------------------------------------------------------|----------------------------------------------------------------------------------------------------------------------------------------------------------------------------------------------------------------------------------------------------------------------------------------------------------------------------------------------------------------------------------------------------------------------------------------------------------------------------------------------------------------------------------------------------------------------------------------------------------------------------------------------------------------------------------------------------------------------------|
|                                    | Main term(s) used to describe learning in practice<br><i>definition, if provided, in italics</i> | Main concept studied<br><i>Definition, if provided, in italics</i>                                                                            | Theoretical or conceptual framework for interpreting results/explicit reference to learning theories | Summary of operationalisation                                                         | Main study results, arranged according to the studies' objectives                                              | Learning activities for nursing students in the hospital setting, identified by the reviewers in the studies' result sections                                                                                                                                                                                                                                                                                                                                                                                                                                                                                                                                                                                              |
| Baraz, Memarian, and Vanaki (2014) | Learning process in clinical setting                                                             | Learning styles in clinical setting<br><i>Individual's preferred methods of knowledge and skill acquisition and information organization.</i> | No theoretical framework, used, reference to Kolb's stages of experiential learning                  | Semi-structured interviews about what and how students learn in the clinical setting. | Three clinical learning styles<br>1. Thoughtful observation<br>2. Learning by doing<br>3. Learning by thinking | <ul style="list-style-type: none"> <li>- careful observation of role models performance</li> <li>- reflective observation during clinical rounds</li> <li>- participating in medical rounds clinical rounds</li> <li>- nursing rounds by instructors and classmates</li> <li>- active involvement in procedures caring for sensitive patients</li> <li>- Active collaboration with peers</li> <li>- maintaining continuity by making active patient contact and repeating nursing procedures</li> <li>- assuming responsibility for patient care</li> <li>- memorizing info by history taking</li> <li>- accountability for clinical homework</li> <li>- inquiring staff and peers</li> <li>- critical thinking</li> </ul> |

|                                              |                                                                                                        |                                                                                                                                                                                                                                                                                             |                                                                                     |                                                                                                                                        |                                                                                                                                                                                                                                                                   |                                                                                                                                                                                                                                    |
|----------------------------------------------|--------------------------------------------------------------------------------------------------------|---------------------------------------------------------------------------------------------------------------------------------------------------------------------------------------------------------------------------------------------------------------------------------------------|-------------------------------------------------------------------------------------|----------------------------------------------------------------------------------------------------------------------------------------|-------------------------------------------------------------------------------------------------------------------------------------------------------------------------------------------------------------------------------------------------------------------|------------------------------------------------------------------------------------------------------------------------------------------------------------------------------------------------------------------------------------|
|                                              |                                                                                                        |                                                                                                                                                                                                                                                                                             |                                                                                     |                                                                                                                                        |                                                                                                                                                                                                                                                                   | - monitoring, critiquing, avoiding unsafe practice                                                                                                                                                                                 |
| <b>Burnard (1992b)</b>                       | Clinical experiences                                                                                   | Experiential learning ' <i>experiential learning</i> ' has been used to describe many different sorts of educational approaches ranging from the use of interactive group strategies) to accrediting people for their life experience when considering those people for entrance to courses | No theoretical framework, used, reference to Kolb's stages of experiential learning | In depth interviews about how students perceive experiential learning                                                                  | Definitions of experiential learning:<br>a. something more than just being taught<br>b. something that you use when you use your own experience<br>c learning in the clinical setting                                                                             | - just doing<br>- just being there<br>- learning by seeing<br>- selecting one of the nurses as a role model<br>- being personally involved and immersed in the learning situation                                                  |
| <b>Burnard (1992a)</b>                       | Clinical experiences                                                                                   | Experiential learning<br><br>No definition provided with justification: ' <i>it appears that the term can be used by different people in different ways</i> '                                                                                                                               | No theoretical framework, used, reference to Kolb's stages of experiential learning | Interviews about how students and tutors experience experiential learning and questionnaire about perceptions of experiential learning | Experiential learning<br>1. is learning by doing<br>2. is personal learning<br>3. involves reflection<br>Students mostly relate experiential learning to learning in the clinical setting.                                                                        | - learning by taking part<br>- not only doing but also reflecting.<br>- observing role models                                                                                                                                      |
| <b>Carey, Chick, Kent, and Latour (2018)</b> | Learning in clinical settings/ learning within the clinical practice environment;<br>Clinical learning | Peer assisted learning<br><br><i>in which students acquire skills and knowledge through the active help provided by status equals or matched</i>                                                                                                                                            | -                                                                                   | Observation of interaction patterns between students                                                                                   | Three themes contributing to impact of peer assisted learning:<br>- peers as facilitators to develop learning<br>- working together as peers to develop clinical practice and deliver care<br>- positive support and interaction from peers to enhance networking | - watching demonstrations by other students<br>- asking questions<br>- seeking advice and guidance<br>- discussing development plans<br>- discussing practice standards<br>- challenging each other's knowledge<br>- Sharing roles |

1  
2  
3  
4  
5  
6  
7  
8  
9  
10  
11  
12  
13  
14  
15  
16  
17  
18  
19  
20  
21  
22  
23  
24  
25  
26  
27  
28  
29  
30  
31  
32  
33  
34  
35  
36  
37  
38  
39  
40  
41  
42  
43  
44  
45  
46

|                                              |                      |                                    |                                                                                  |                                                                                                                                                                            |                                                                                                                                                                                                                                                                                                                                                                                                                                                                                                                                       |                                                                                                                                                                                                                                                                                                                                                                                                                                                                                                                                                                                                                                                                                                                                                            |
|----------------------------------------------|----------------------|------------------------------------|----------------------------------------------------------------------------------|----------------------------------------------------------------------------------------------------------------------------------------------------------------------------|---------------------------------------------------------------------------------------------------------------------------------------------------------------------------------------------------------------------------------------------------------------------------------------------------------------------------------------------------------------------------------------------------------------------------------------------------------------------------------------------------------------------------------------|------------------------------------------------------------------------------------------------------------------------------------------------------------------------------------------------------------------------------------------------------------------------------------------------------------------------------------------------------------------------------------------------------------------------------------------------------------------------------------------------------------------------------------------------------------------------------------------------------------------------------------------------------------------------------------------------------------------------------------------------------------|
|                                              |                      | <i>companions (Topping, 2005).</i> |                                                                                  |                                                                                                                                                                            | and develop working structure.                                                                                                                                                                                                                                                                                                                                                                                                                                                                                                        | <ul style="list-style-type: none"> <li>- sharing experiences of clinical practice</li> <li>- discussing challenges of finding one's way in the clinical environment</li> </ul>                                                                                                                                                                                                                                                                                                                                                                                                                                                                                                                                                                             |
| <b>Dadgaran, Parvizy, and Peyrovi (2012)</b> | Clinical learning    | Clinical learning                  | -                                                                                | semi-structured interviews about how students experience their clinical learning; subsequent observations of students in the clinical setting with a focus on interactions | <p>Five categories and one 'core variable':</p> <ol style="list-style-type: none"> <li>1. facing unfavourable clinical facts</li> <li>2. analysis of a clinical situation and appropriate decision making</li> <li>3. bridging the gap between practice and theory</li> <li>4. struggle for clinical independence</li> <li>5. Dynamism</li> <li>6. struggle to acquire clinical competence</li> </ol> <p>Two approaches to learning:</p> <ol style="list-style-type: none"> <li>1. Microlearning</li> <li>2. Macrolearning</li> </ol> | <ul style="list-style-type: none"> <li>- trying to figure out what regulations are and what they should be through detection of the environment</li> <li>- modify learning deficits to fight the feeling of being unable to answer questions</li> <li>- try to analyse the situation and make an appropriate decision</li> <li>- increase theoretical knowledge through reading books and asking questions</li> <li>- in the ward, review already learned materials (reconstructive thinking)</li> <li>- analysis of clinical issues (clinical reasoning)</li> <li>- making links between theory and practice</li> <li>- design care plans</li> <li>- organizing care on the basis of self-made care plans</li> <li>- doing tasks independently</li> </ul> |
| <b>Gidman (2013)</b>                         | Learning in practice | Learning from patient stories      | No theoretical framework, used, reference to Eraut's theory on informal learning | Conversational interviews about students' perceptions of their learning experiences of listening to patient stories.                                                       | <ol style="list-style-type: none"> <li>1. Students value listening to stories for learning</li> <li>2. students develop relationships with patients</li> <li>3. students learn from the subjective and emotional perspective of patients</li> <li>4. students think back to their own personal stories when caring for</li> </ol>                                                                                                                                                                                                     | <ul style="list-style-type: none"> <li>- listening to patients' personal stories</li> <li>- building relationships with patient</li> <li>- listening to relatives of a patient</li> <li>- reflecting on personal experiences</li> </ul>                                                                                                                                                                                                                                                                                                                                                                                                                                                                                                                    |

|                                  |                                              |                                    |                                 |                                                                                    |                                                                                                                                                                                                                                                                                                                                                                                            |                                                                                                                                                                                                                                                                                                                                                                                                                                                                                                                                                                                                                                                                                                                                                                                                                                                                                                                                                                              |
|----------------------------------|----------------------------------------------|------------------------------------|---------------------------------|------------------------------------------------------------------------------------|--------------------------------------------------------------------------------------------------------------------------------------------------------------------------------------------------------------------------------------------------------------------------------------------------------------------------------------------------------------------------------------------|------------------------------------------------------------------------------------------------------------------------------------------------------------------------------------------------------------------------------------------------------------------------------------------------------------------------------------------------------------------------------------------------------------------------------------------------------------------------------------------------------------------------------------------------------------------------------------------------------------------------------------------------------------------------------------------------------------------------------------------------------------------------------------------------------------------------------------------------------------------------------------------------------------------------------------------------------------------------------|
|                                  |                                              |                                    |                                 |                                                                                    | patients<br>5. listening to stories has a positive impact on understanding patients and a commitment to patient care.                                                                                                                                                                                                                                                                      |                                                                                                                                                                                                                                                                                                                                                                                                                                                                                                                                                                                                                                                                                                                                                                                                                                                                                                                                                                              |
| <b>Grealish and Ranse (2009)</b> | learning in the workplace, clinical learning | Learning in the clinical workplace | Community of practice           | Students' written narratives about where they learned while on clinical placement. | Three thematic constructs, called 'learning triggers':<br>a. participation (or observation) of a task or procedure that leads to (takes them into) a complex, dramatic reading of nursing work<br>b. being personally (emotionally) confronted by the work (high challenge)<br>c. meeting nurses who contribute to the development of an image of what the students wants to be as a nurse | <ul style="list-style-type: none"> <li>- being involved in the practical aspects of caring for a patient</li> <li>- shifting focus from the task to the person</li> <li>- talking to patients' relatives</li> <li>- looking at the patient as a person, taking an interest in their needs</li> <li>- engaging in post-operative observations</li> <li>- assisting patients in little things</li> <li>- giving medications</li> <li>- Being personally (emotionally) confronted by the work</li> <li>- experiencing positive and negative emotions</li> <li>- taking responsibility</li> <li>- talking to patients</li> <li>- meeting nurses who contribute to the development as an image</li> <li>- identifying a resident nurse as a role model</li> <li>- receiving feedback from resident nurses</li> <li>- aligning personal practice with what is observed</li> <li>- working independently in a supportive surrounding</li> <li>- witnessing poor practice</li> </ul> |
| <b>Green and Holloway (1996)</b> | Learning in the clinical setting             | experiential learning              | No theoretical framework, used, | Non-directive interviews about students'                                           | 6 themes:<br>a. Students were able to define experiential learning, usually                                                                                                                                                                                                                                                                                                                | <ul style="list-style-type: none"> <li>- working with the client (including the intuitive element)</li> <li>- participating, interacting, shared</li> </ul>                                                                                                                                                                                                                                                                                                                                                                                                                                                                                                                                                                                                                                                                                                                                                                                                                  |

1  
2  
3  
4  
5  
6  
7  
8  
9  
10  
11  
12  
13  
14  
15  
16  
17  
18  
19  
20  
21  
22  
23  
24  
25  
26  
27  
28  
29  
30  
31  
32  
33  
34  
35  
36  
37  
38  
39  
40  
41  
42  
43  
44  
45  
46

|                    |                     |                                                                                                                                                                                                                        |                                                     |                                                                        |                                                                                                                                                                                                                                                                                                                                                                                                                                                                                                                                                                                                                  |                                                                                                                                                                                                                                                                                                                                                                                                                                                                                                                                                                                      |
|--------------------|---------------------|------------------------------------------------------------------------------------------------------------------------------------------------------------------------------------------------------------------------|-----------------------------------------------------|------------------------------------------------------------------------|------------------------------------------------------------------------------------------------------------------------------------------------------------------------------------------------------------------------------------------------------------------------------------------------------------------------------------------------------------------------------------------------------------------------------------------------------------------------------------------------------------------------------------------------------------------------------------------------------------------|--------------------------------------------------------------------------------------------------------------------------------------------------------------------------------------------------------------------------------------------------------------------------------------------------------------------------------------------------------------------------------------------------------------------------------------------------------------------------------------------------------------------------------------------------------------------------------------|
|                    |                     |                                                                                                                                                                                                                        | reference to Kolb's stages of experiential learning | understanding, experience and interpretation of experiential learning. | encapsulating both classroom and clinical experience. The importance of the experience itself appeared fundamental.<br>b. Role play is identified as the main example of experiential teaching and learning.<br>c. Students were aware of the issues arising from the problematic relationship between theory and practice.<br>d. The importance of reflection as a stage in experiential learning and of reflective practice was highlighted indicating diversity in application.<br>e. Concerns regarding clinical practice.<br>f. The importance of clinical supervision viewing it as experiential learning. | <ul style="list-style-type: none"> <li>- learning with peers.</li> <li>- evaluating nursing models</li> <li>- reflecting.</li> <li>- sharing experiences.</li> <li>- selecting from previous experience to contribute to new ones</li> <li>- practicing of skills</li> <li>- practicing with people.</li> <li>- patient care</li> <li>- non-threatening supportive collaboration with a colleague</li> <li>- learning form practice and reflection</li> <li>- involving clients</li> <li>- reflecting in the form of a portfolio</li> <li>- maintaining personal journals</li> </ul> |
| <b>Kear (2009)</b> | Clinical experience | transformative learning<br><i>The process of critically reflecting upon previous assumptions or understandings in order to determine whether one still holds them to be true or challenges their claims (Mezirow).</i> | Transformative learning                             | Students' stories about how they experienced their learning            | Upon analysis of the narrative data, five threads emerged from the interviews with the participants.<br>1) Stories of the multi-faceted process of learning<br>2) Stories of experiential learning<br>3) Stories of human interactions as central to defining nursing and caring<br>4) Stories that intertwine personal life experiences and nursing<br>5) Stories of transformative learning                                                                                                                                                                                                                    | <ul style="list-style-type: none"> <li>- creating a connection between clinical experience and classroom material</li> <li>- utilizing peers</li> <li>- learning how to do things</li> <li>- meeting patients with their own stories</li> <li>- looking things up in one's books</li> <li>- providing end-of-life care</li> <li>- caring for a paediatric cancer patient and seeing graduate nurses let her do it in her own way</li> <li>- learning to understand the needs of patients that are unable to communicate</li> <li>- observing other nurses to</li> </ul>              |

|                               |                                                                                                                                                          |                                                                                                                                                                        |                                          |                                                                                      |                                                                                                                                                                                                                                                                                                                                                                                                                                                                             |                                                                                                                                                                                                                                                                                                                                                                                                                                                                                                                          |
|-------------------------------|----------------------------------------------------------------------------------------------------------------------------------------------------------|------------------------------------------------------------------------------------------------------------------------------------------------------------------------|------------------------------------------|--------------------------------------------------------------------------------------|-----------------------------------------------------------------------------------------------------------------------------------------------------------------------------------------------------------------------------------------------------------------------------------------------------------------------------------------------------------------------------------------------------------------------------------------------------------------------------|--------------------------------------------------------------------------------------------------------------------------------------------------------------------------------------------------------------------------------------------------------------------------------------------------------------------------------------------------------------------------------------------------------------------------------------------------------------------------------------------------------------------------|
|                               |                                                                                                                                                          |                                                                                                                                                                        |                                          |                                                                                      |                                                                                                                                                                                                                                                                                                                                                                                                                                                                             | <p>determine what kind of nurse they want to be (both negatively and positively)</p> <ul style="list-style-type: none"> <li>- just spending time with patients</li> <li>- observing patient situations that were unjust or nursing care that was viewed as sub-optimal</li> </ul>                                                                                                                                                                                                                                        |
| <b>Kear (2013)</b>            | Clinical experiences                                                                                                                                     | transformative learning<br><i>Changes in meaning perspectives that have developed over an individual's lifetime based upon their life experiences (Mezirow, 2000).</i> | Transformative learning                  | Students' stories about how they experienced their learning                          | <p>Upon analysis of the narrative data, five threads emerged from the interviews with the participants.</p> <ol style="list-style-type: none"> <li>1) Stories of the multi-faceted process of learning</li> <li>2) Stories of experiential learning</li> <li>3) Stories of human interactions as central to defining nursing and caring</li> <li>4) Stories that intertwine personal life experiences and nursing</li> <li>5) Stories of transformative learning</li> </ol> | <ul style="list-style-type: none"> <li>- creating a connection between clinical experiences and classroom material</li> <li>- Interacting with others in the clinical environment</li> <li>- understanding patients' needs by interacting with them</li> <li>- observing nurses to determine what kind of nurse they want to be providing end-of-life care</li> </ul>                                                                                                                                                    |
| <b>Manninen et al. (2013)</b> | learning process in clinical practice; learning through participation and dialogue; learning in clinical practice; learning at a clinical education ward | Experiences of learning at a clinical ward                                                                                                                             | Authenticity and transformative learning | semi-structured interviews of how students experienced their encounters with others. | <p>Two main themes:</p> <ol style="list-style-type: none"> <li>a. mutual relationship</li> <li>b. belongingness</li> </ol>                                                                                                                                                                                                                                                                                                                                                  | <ul style="list-style-type: none"> <li>- creating a relationship with patients by meeting them independently</li> <li>- listening and communicating with the patient/ adjust communication to the individual patient's capacity and needs</li> <li>- involving the patient in the nursing process by identifying the patient's own resources</li> <li>- Learning from making failures</li> <li>- handling difficult situations and feelings</li> <li>- collaborating with physicians, physiotherapists, other</li> </ul> |

|                                  |                               |                                                                                                                                                                                 |                                                                    |                                                                                                                                                                                                                                        |                                                                                                                                                                                                                                                                                                                                                                                                                                                                                                                                                           |                                                                                                                                                                                                                                                                                                                                                                                       |
|----------------------------------|-------------------------------|---------------------------------------------------------------------------------------------------------------------------------------------------------------------------------|--------------------------------------------------------------------|----------------------------------------------------------------------------------------------------------------------------------------------------------------------------------------------------------------------------------------|-----------------------------------------------------------------------------------------------------------------------------------------------------------------------------------------------------------------------------------------------------------------------------------------------------------------------------------------------------------------------------------------------------------------------------------------------------------------------------------------------------------------------------------------------------------|---------------------------------------------------------------------------------------------------------------------------------------------------------------------------------------------------------------------------------------------------------------------------------------------------------------------------------------------------------------------------------------|
|                                  |                               |                                                                                                                                                                                 |                                                                    |                                                                                                                                                                                                                                        |                                                                                                                                                                                                                                                                                                                                                                                                                                                                                                                                                           | <ul style="list-style-type: none"> <li>professionals and other students working together with other students, discussing patient care, sharing experiences giving support, informing and showing</li> </ul>                                                                                                                                                                           |
| <b>Manninen (2016)</b>           | Learning in clinical practice | Nursing students' learning in relation to encounters with patients, supervisors, peer students and other healthcare professionals.                                              | transformative learning and concepts of authenticity and threshold | Semi-structured interviews and group interviews of students' experience of their learning with a focus on their encounters with others. Observations with follow up interviews about student-patient encounters and about supervision. | The results show that the core of student meaningful learning is the experience of both external and internal authenticity. External authenticity refers to being in a real clinical setting meeting real patients. Internal authenticity is about the feeling of belonging and really contributing to patients' health and well-being.                                                                                                                                                                                                                   | <ul style="list-style-type: none"> <li>creating mutual relationships</li> <li>taking care of patients with extensive needs for nursing interventions.</li> </ul>                                                                                                                                                                                                                      |
| <b>Mayson and Hayward (1997)</b> | Clinical practice experiences | Learning from hidden curriculum<br><i>Hidden curriculum involves the experience and application of theory and the wider social context relates to the practice development.</i> | hidden curriculum                                                  | semi-structured interviews about clinical areas and persons that have been beneficial for students' learning, as well as descriptions of their learning.                                                                               | <i>Given a lack of a summary of important themes, I extracted these findings myself</i><br><ol style="list-style-type: none"> <li>1. caring relationship is central for nursing; relationships with patients are significant experiences</li> <li>2. Registered nurses and tutors are contributors to students' learning if they include students</li> <li>3. students actively seek positive experiences</li> <li>4. Peers play a significant role in learning</li> <li>5. importance of being part of the ward team, facilitated by the ward</li> </ol> | <ul style="list-style-type: none"> <li>Working in the medical/surgical areas.</li> <li>Talking with/ listening to clients</li> <li>helping/ making a difference for the patient</li> <li>looking at positive role models</li> <li>sitting together with peers/talking to peers about experiences.</li> <li>watching supervisors on nursing skills and communication skills</li> </ul> |



|                              |                                                 |                                                                                                                                                                      |                                                                                                                                   |                                                                                                                                       |                                                                                                                                                                                                                       |                                                                                                                                                                                                                                                                                                                                                                                                                                                                                                                                                                                            |
|------------------------------|-------------------------------------------------|----------------------------------------------------------------------------------------------------------------------------------------------------------------------|-----------------------------------------------------------------------------------------------------------------------------------|---------------------------------------------------------------------------------------------------------------------------------------|-----------------------------------------------------------------------------------------------------------------------------------------------------------------------------------------------------------------------|--------------------------------------------------------------------------------------------------------------------------------------------------------------------------------------------------------------------------------------------------------------------------------------------------------------------------------------------------------------------------------------------------------------------------------------------------------------------------------------------------------------------------------------------------------------------------------------------|
|                              |                                                 |                                                                                                                                                                      |                                                                                                                                   |                                                                                                                                       | nurse<br>6. theory-practice gap                                                                                                                                                                                       |                                                                                                                                                                                                                                                                                                                                                                                                                                                                                                                                                                                            |
| <b>Roberts (2008)</b>        | Clinical learning; informal on-the job learning | Peer learning<br><i>Peer learning involves students learning from each other</i>                                                                                     | No theoretical framework, used, reference to Eraut's theory on informal learning and Melia's theory of professional socialization | observation of students in clinical practice with a focus on peer interactions                                                        | Themes:<br>a. value placed on friendships and learning in clinical practice.<br>B. students learning survival skills (implicit and explicit rules)<br>c. developing clinical skills                                   | <ul style="list-style-type: none"> <li>- working alongside other students.</li> <li>- passing along implicit rules</li> <li>- making mistakes/ being pulled up/called about them</li> <li>- sharing clinical skills</li> <li>- asking other students for help.</li> <li>- teaching other students, regardless of year of study.</li> </ul>                                                                                                                                                                                                                                                 |
| <b>Seylani et al. (2012)</b> | Clinical experiences                            | Informal learning<br><i>Informal or indirect learning can occur as a function of observing, retaining, and replicating behaviours during educational experiences</i> | -                                                                                                                                 | semi-structured interviews about what changes students experienced during their study apart from theoretical and practical knowledge. | Five categories of students' experiences:<br>a. personal maturity and emotional growth,<br>b. social development<br>c. closeness to God<br>d. alterations in value systems<br>e. ethical and professional commitments | <ul style="list-style-type: none"> <li>- Frequent personal interactions</li> <li>- developing relationships</li> <li>- frequent exposure to life and death situations</li> <li>- interacting with others.</li> <li>- caring for people with different religious beliefs</li> <li>- learning from patients struggling with chronic illness</li> <li>- continuously engaging with people who need help</li> <li>- seeing patients suffer</li> <li>- communicating with patients</li> <li>- caring for the most vulnerable</li> <li>- confronting the light and dark sides of life</li> </ul> |
| <b>Stockhausen (2005)</b>    | learning in the workplace                       | learning in the workplace                                                                                                                                            | No theoretical framework, used, reference to Kolb's stages of experiential learning                                               | Students' journals and reflective group debriefings comprehending reflections on clinical experiences.                                | Themes<br>a. Entering the world of the patient<br>b. Clinicians making a difference<br>c. Constructing an identity as a nurse                                                                                         | <ul style="list-style-type: none"> <li>- learn through the patient's experience</li> <li>- reacting to and deciphering emotive non-verbal cues from the patient as they care for them.</li> <li>- interacting with the patient</li> <li>- reflectively interpreting experiences with the patient.</li> </ul>                                                                                                                                                                                                                                                                               |

1  
2  
3  
4  
5  
6  
7  
8  
9  
10  
11  
12  
13  
14  
15  
16  
17  
18  
19  
20  
21  
22  
23  
24  
25  
26  
27  
28  
29  
30  
31  
32  
33  
34  
35  
36  
37  
38  
39  
40  
41  
42  
43  
44  
45  
46

For peer review only

|                       |                                                         |                              |  |                                                                                    |                                                                                                                                                 |                                                                                                                                                                                                                                                                                                                                                                                                                                                                                                                                                                                                                                                                                                                                     |
|-----------------------|---------------------------------------------------------|------------------------------|--|------------------------------------------------------------------------------------|-------------------------------------------------------------------------------------------------------------------------------------------------|-------------------------------------------------------------------------------------------------------------------------------------------------------------------------------------------------------------------------------------------------------------------------------------------------------------------------------------------------------------------------------------------------------------------------------------------------------------------------------------------------------------------------------------------------------------------------------------------------------------------------------------------------------------------------------------------------------------------------------------|
|                       |                                                         |                              |  |                                                                                    |                                                                                                                                                 | <ul style="list-style-type: none"> <li>- sharing and developing everyday nursing practices with the RN</li> <li>- constructing their own schemata of admirable qualities the RN displays</li> <li>- picking up little tips from the RN/ little things that she does.</li> <li>- listening to RNs</li> <li>- confirming their nursing practices and assimilating theoretical and clinical knowledge</li> <li>- practicing skills</li> <li>- doing what it is that nurses do</li> <li>- activities such as making a bed or showering a patient when considered from a student's achievement perspective.</li> <li>- Engaging with the activities of nursing</li> <li>- Making comparisons and discriminations of practices</li> </ul> |
| <b>Windsor (1987)</b> | Learning in the contextual setting of clinical practice | clinical learning experience |  | Focused interviews about how nursing students perceive their clinical experiences. | Main categories of learning: nursing skills, time management, professional socialization. A pattern of student development through three phases | <ul style="list-style-type: none"> <li>- practicing nursing skills</li> <li>- going back to books and journals</li> <li>- poring over chart for hours</li> <li>- consulting other health care providers</li> <li>- writing papers</li> <li>- observing nurses and participating in nursing functions</li> <li>- preparing for clinical practice including meeting patients, reading charts, studying patients' health needs, consulting staff.</li> <li>- Caring for lots of different patients with different diseases, different kinds of wards, variety of instructors, working with different equipment.</li> </ul>                                                                                                             |

1  
2  
3  
4  
5  
6  
7  
8  
9  
10  
11  
12  
13  
14  
15  
16  
17  
18  
19  
20  
21  
22  
23  
24  
25  
26  
27  
28  
29  
30  
31  
32  
33  
34  
35  
36  
37  
38  
39  
40  
41  
42  
43  
44  
45  
46

|  |  |  |  |  |  |                                                                                                                                                                                                            |
|--|--|--|--|--|--|------------------------------------------------------------------------------------------------------------------------------------------------------------------------------------------------------------|
|  |  |  |  |  |  | <ul style="list-style-type: none"> <li>- Working more subsequent shifts with the same patient</li> <li>- asking question without feeling embarrassed</li> <li>- asking questions to their peers</li> </ul> |
|--|--|--|--|--|--|------------------------------------------------------------------------------------------------------------------------------------------------------------------------------------------------------------|

Table 2. Main concepts, operationalisations, frameworks, findings, learning activities of the included studies

For peer review only

## Conceptualisations

### *Main concepts*

To analyse how learning in practice was approached, we compared the main concepts of study, usually reflected in the aims of the paper. Five of the papers studied a concept that was a synonym for learning in clinical practice such as clinical learning experience or workplace learning<sup>17 27 28 31 32</sup>. However, in none of these studies the concept was defined or justified. The remaining eleven studies examined a specific concept related to learning in general, which was studied within the context of clinical practice. In four of the studies this concept concerned social learning, either in general, or from specific groups that are naturally present in the nursing ward<sup>16 24 26 30</sup>. In five of the studies, the non-conscious, unplanned nature of learning was explicitly targeted by the concepts of experiential, informal, and hidden curriculum learning<sup>20-23 29</sup>. The remaining studies focused on the active role of the student in learning by investigating learning styles<sup>25</sup>, or a specific combination of both the process and effects of learning as reflected in the concept of transformative learning<sup>18 19</sup>.

### *Theoretical frameworks*

The five studies that used a theoretical or conceptual framework to structure the study, used Wenger's community of practice<sup>28</sup> or Mezirow's transformative learning theory<sup>16-19</sup>. Three of the studies tried to extend on existing theories using a grounded theory approach<sup>20 21 27</sup>. The remaining nine studies discussed their research questions and findings in the light of previous literature relevant for their specific study<sup>22 23 31 32</sup>, some of them referring to theories about learning such as Eraut's theory of informal learning, Melia's theory of professional socialization<sup>30</sup>, or Kolb's learning cycle<sup>20-22 25 31</sup>.

## Operationalisations

Nine studies used interviews, narratives or both to address students' experiences of learning in general<sup>18 19 25 27-29</sup> or specifically learning from interactions<sup>16 17 24</sup>. The different approaches shared a semi-structured nature, in which a few main topics were introduced by the researcher, to which students could bring up their ideas and experiences. Some authors<sup>20-22</sup> combined an exploration of what students understood by experiential learning, with an examination of their actual experiences in experiential learning. Finally, in three of the studies, learning was operationalised by the observation of interactions between nursing students and peers or colleagues that play a role in learning<sup>16 26 30</sup>.

## Comparison of conceptualisations and operationalisations

Most of the studies, apart from the ones that focus on social interactions, adopted a very open approach to examine learning in practice, irrespective of the concepts and theoretical frameworks

1  
2  
3 used. This resulted in a variety of overlapping outcomes. Together with the small number of studies,  
4 a thorough comparison of the suitability of different concepts was difficult. However, the overarching  
5 focus on students' personal, unplanned learning experience as a result of social interactions, suggests  
6 that the use of concepts derived from constructivist and social-cultural theories are most appropriate  
7 for studying clinical learning in nursing education.<sup>33</sup>  
8  
9  
10

### 11 Learning activities

12 The thematic analysis allowed us to extract the following classes of activities that are observed or  
13 reported to contribute to learning during the daily presence of students in the nursing ward.  
14  
15

- 16 a. Working as a nurse
- 17 b. Interacting with ward staff
- 18 c. Interacting with peers
- 19 d. Interacting with patients
- 20 e. Processing information.

#### 21 a. *Working as a nurse*

22 Students learn by actively engaging in nursing practice, including gaining responsibility for designing  
23 care plans, organising care, practicing skills and delivering patient care themselves<sup>18 20-22 25 27 28 31</sup>,  
24 within a supportive environment<sup>28</sup>. Several studies explicitly report how the importance of working  
25 independently evolves throughout training<sup>16 17 27 32</sup>. It should be noted that this theme may overlap  
26 with the other themes, and might reflect a more general characteristic of learning in practice.  
27  
28

#### 29 b. *Interacting with ward staff*

30 Students learn by observing both good and poor examples of registered nurses, listening to them and  
31 choosing which one could serve as a role model<sup>18-21 23 25 28 29 31 32</sup>. Students learn from other  
32 professionals on the ward, for example by listening to their discussions during rounds<sup>17 25 32</sup> or  
33 receiving feedback<sup>28</sup>. Beside observing nurses, students learn from sharing their work experiences  
34 with resident nurses and questioning them<sup>25 27 31 32</sup>.  
35  
36

#### 37 c. *Interacting with peers*

38 Students learn from peers by working together, questioning each other, sharing experiences,  
39 observing each other at work<sup>18 22 25 26 29</sup>, and teaching each other<sup>30</sup>. They pass on implicit rules by  
40 asking for advice and guidance. Through discussing standards in practice, development plans and  
41 practical issues they challenge each other and expand their knowledge<sup>26</sup>. Through dividing the work  
42 between them, students optimise their exposure to different learning situations<sup>26</sup>.  
43  
44  
45  
46  
47  
48  
49  
50  
51  
52  
53  
54  
55  
56  
57  
58  
59  
60

#### d. *Interacting with patients*

Listening to patients and building relationships is reported as an activity that students learn from<sup>16-18 22 24 28 29</sup>. Providing end-of-life care contributes to students' learning,<sup>18 19 23</sup> as well as caring for specific patient groups such as those with different religious beliefs, communication problems, extensive needs, chronic illnesses or who visibly suffer<sup>16-18 23 25 31</sup>. Concrete activities that are regarded to be valuable include involving the patient in the nursing process<sup>17</sup>, assisting them with little things<sup>28</sup>, giving medication, doing post-operative observations, and performing simple tasks such as making a bed; as long as they can be done independently<sup>28</sup>.

#### e. *Processing information*

A final class of activities refers to how students look up, process, and store information related to patient care and their learning process. Reflecting on nursing practice promotes learning<sup>20-22 25 31</sup>, sometimes supported by a journal or a portfolio<sup>22</sup>. More specifically, students reflect by analysing and comparing nursing practice and thinking how to improve it, making connections with theory and previous experience<sup>18 19 25 27 31</sup>. Negative experiences such as not being able to answer questions, witnessing poor practice, making mistakes, and emotion evoking encounters, stimulate students to reflect and expand their knowledge and skills<sup>17 18 23 28 30</sup>. Students benefit from going through textbooks<sup>18 27 32</sup> and patient charts<sup>25 32</sup>, as a preparation for the work shift or for specific activities such as patient education.

### Summary of results

Figure 2 summarises the findings regarding conceptualisations, operationalisations and learning activities.

### Expert consultation

All four experts acknowledged the synthesised learning activities as the core of clinical training. One of them added a nuance that some activities automatically promote learning ('learning by doing'), while others require support by staff (e.g. 'peer learning'). Moreover, one of them noted that experiences may only result in learning after the learning has been made conscious. Compared to their ideal vision of practice learning, another expert missed the active role of the student in creating learning opportunities, as well as formalised elements of learning, such as the formulation of learning goals and the elaboration of theory learned in school. However, this was something they missed in their own daily practice as well. Finally, two experts noted that the 'supervisor' role of the resident nurse was referred to minimally; it appeared that resident nurses were primarily observed as role

1  
2  
3 models. Two of the experts were surprised by the notion that negative experiences are repeatedly  
4 mentioned as learning opportunities.  
5  
6  
7

## 8 DISCUSSION 9

10 This study aimed to examine how different concepts equivalent to “learning in practice” are  
11 operationalised and which learning activities are reported in the nursing education literature. The  
12 final aim was to propose a terminology to guide future studies. The scoping approach allowed for  
13 identification of gaps in the current literature<sup>7</sup>. Five of the 17 reviewed studies adopted a general, yet  
14 unexplained, synonym for learning in practice as their object of study, the others approached  
15 learning in practice focusing on the social, unplanned, and active nature of learning. These foci are in  
16 line with the broader literature on practice learning in healthcare education<sup>3 34</sup>. Regardless of  
17 conceptualisations, all studies adopted a qualitative approach, resulting in various, yet overlapping  
18 themes. A closer examination of learning activities that were reported throughout the results,  
19 revealed five classes of activities that are congruent with separate bodies of literature on the  
20 importance of increasing independence<sup>35</sup>, interaction with others<sup>36</sup>, learning from authentic  
21 situations with patients, and reflection<sup>37</sup>, as well as with experiences from our expert panel.  
22  
23  
24  
25  
26  
27  
28  
29  
30  
31

32 Our eventual aim was to make suggestions about the use of terminology in future research. The use  
33 of various terms for the same phenomenon may be inherent to the existence of different learning  
34 theories<sup>34</sup>, that each lack explanatory power to inform all aspects of clinical education<sup>38</sup>.

35 Unfortunately, as the poor alignment within most studies resulted in similar operationalisations and  
36 results irrespective of the concepts used, specific recommendations about how to use these  
37 concepts are hard to make on the basis of the current literature. Yet, when considering overarching  
38 trends, all concepts and learning activities in the current body of research fit well into a constructivist  
39 approach to learning, and more specifically experiential learning theories<sup>34</sup>. Building on educational  
40 theorists like Piaget and Dewey<sup>33</sup>, experiential learning theories cover both cognitive and  
41 sociocultural approaches to learning<sup>34</sup>, sharing the idea that learning evolves from doing, in an  
42 individual trajectory that is not predefined, in constant interaction with others, in which reflection  
43 and the interaction between theory and practice are central<sup>3 34</sup>. Although some of the studies in the  
44 current research did use experiential theories or referred to them<sup>20-22 25 31</sup>, a more systematic and  
45 justified use of these theories and underlying concepts to frame and interpret research, would  
46 benefit future research. For instance, as was commented by one of the experts we consulted, the  
47 interactions between behaviour and cognitive processing were underexposed in the current  
48 literature. Cognitive approaches of experiential learning building on the work of Kolb<sup>39</sup> could offer  
49  
50  
51  
52  
53  
54  
55  
56  
57  
58  
59  
60

1  
2  
3 useful models to study and interpret these interactions. Given the body of work on experiential  
4 learning theories including their application in different stages of (medical) education, further  
5 elaboration on these theories can add to our understanding of learning and can help design and  
6 evaluate learning interventions in and outside the ward<sup>40 41</sup>.  
7  
8  
9

10 Although some studies demonstrated how students actively interact with their environment by  
11 discussing inconsistencies, asking questions, and reflecting on undesirable role models, few of them  
12 offered examples of students actively creating learning opportunities or negotiating what and how to  
13 learn. This is in line with literature showing that students often focus on task completion and fitting  
14 into the team at the expense of deepening, broadening and self-regulating their learning<sup>42 43 44</sup>.  
15 Future studies should continue to address both individual and environmental factors that affect  
16 students' ability to actively and critically navigate through their clinical placements. In line with our  
17 previous recommendations, approaching clinical learning as 'experiential learning', may help seeing it  
18 as a pathway for personal development rather than getting students adapted to the current work in  
19 the ward<sup>45</sup>. A next step would be to identify individual preferences and behaviours in appreciating  
20 learning opportunities. Caution has to be taken though in labels such as 'learning styles' as one of  
21 the studies<sup>25</sup> did, in the absence of an accurate description of how this has been interpreted.  
22  
23  
24  
25  
26  
27  
28  
29  
30

31 Not surprisingly, there were frequent references to the informal or hidden nature of clinical learning.  
32 As this learning occurs partly unconsciously, it is a challenging subject to define and study<sup>46</sup>. In the  
33 reviewed studies, informal learning was addressed by what it is *not* (i.e. theoretical and practical  
34 knowledge), and hidden curriculum was described by learning resources that were *not* reported by  
35 participants<sup>47</sup>. Formal or formalised activities in the clinical area (such as peer teaching and doing  
36 'clinical homework'), were not labelled as such. As both formal and informal learning coexist in the  
37 practice setting and the dichotomy between the two has been questioned<sup>48</sup>, clear definitions of  
38 these concepts are required, with which the different activities that student engage in throughout  
39 the day can be classified.  
40  
41  
42  
43  
44  
45  
46

47 In most of the studies, potential or desirable learning outcomes were not articulated, and were not  
48 separated from outcomes such as professional identity formation or wellbeing. Studies that did  
49 include the intended effect of learning in their definitions, as those of Kear<sup>18 19</sup>, did not critically  
50 revisit if these outcomes were indeed reported. The lack of predefined outcomes in clinical learning<sup>49</sup>  
51 and the scope of this review excluding articles confined to skills performance<sup>50</sup> or assessment<sup>51</sup>,  
52 might explain why learning outcomes received relatively little attention in the reviewed studies.  
53  
54  
55  
56 However, critically discussing the learning process in relation to actual and desirable outcomes, with  
57  
58  
59  
60



1  
2  
3 reference to the body of literature on this topic, would improve our understanding of clinical  
4 learning.  
5  
6

7 In this review, clinical learning has been studied from the viewpoint of the student as a learner, as  
8 opposed to the perspective of external factors affecting students' learning. However, as both this  
9 review and previous literature have demonstrated<sup>2</sup>, learning is a social process that is highly  
10 dependent on the environment. If students feel supported by the team they will be more willing to  
11 take responsibility and actively create learning opportunities<sup>43 52</sup>. The current work adds to our  
12 understanding of the student's role within the complex structure of clinical nursing education and  
13 can be a starting point for future research on how individual interactions between students and their  
14 environment promote learning.  
15  
16  
17  
18  
19  
20  
21  
22

### 23 24 Limitations

25 The variety of concepts, processes, definitions and outcomes associated with learning in clinical  
26 practice proved challenging in determining the boundaries of our search. The selection was  
27 influenced by choice of terminology and framing by the authors of the studies. This review therefore  
28 provides insight into the current use of terminology as well as caveats in applying it. Limiting to  
29 nursing in the hospital setting excluded us from both theoretical and experimental research on  
30 practice learning in other health professions. However, this focus enabled us to synthesise specific  
31 findings from the different studies. The approach can be of interest for other health professions, and  
32 will eventually allow for comparison of the literature. Finally, our synthesis of learning activities is  
33 based on studies with heterogeneity in populations, setting, and year of publication, in which the  
34 same type of activity might have a different meaning. As we reinterpreted some of the data, caution  
35 has to be taken in drawing firm conclusions<sup>53</sup>. Nevertheless, as the findings were recognised by  
36 experts and correspond with existing literature, the categories found are a good starting point for  
37 further study.  
38  
39  
40  
41  
42  
43  
44  
45  
46  
47

### 48 Conclusion

49 This review provides an overview of how learning in clinical practice has been addressed in the  
50 undergraduate nursing education literature and which learning activities are reported. The studies  
51 share a constructivist approach to learning, but offer little guidance for the use of specific  
52 terminology in future studies due to a lack of alignment within the studies. Studies consistently  
53 reveal the importance of working independently, learning from peers, professionals and patients,  
54 and the cognitive appraisal of learning. Both the approaches and reported learning activities fit well  
55 into experiential learning theories. There is still uncertainty about formal and informal components  
56  
57  
58  
59  
60

of learning and how they should be studied, as well as about desirable outcomes of clinical learning and how to incorporate them in research. Given the importance of students' active engagement in learning as well as their reflection on it, behavioural and cognitive aspects of learning as well as their interactions should be explicitly addressed.

## REFERENCES

1. Cope P, Cuthbertson P, Stoddart B. Situated learning in the practice placement. *J Adv Nurs* 2000;31(4):850-56.
2. Flott EA, Linden L. The clinical learning environment in nursing education: a concept analysis. *J Adv Nurs* 2016;72(3):501-13. doi: 10.1111/jan.12861
3. Manley K, Titchen A, Hardy S. Work-based learning in the context of contemporary health care education and practice: A concept analysis. *Pract Dev Health Care* 2009;8(2):87-127. doi: 10.1002/pdh.284
4. Bisholt B, Ohlsson U, Engstrom AK, et al. Nursing students' assessment of the learning environment in different clinical settings. *Nurse education in practice* 2014;14(3):304-10. doi: 10.1016/j.nepr.2013.11.005 [published Online First: 2013/12/21]
5. Davis K, Drey N, Gould D. What are scoping studies? A review of the nursing literature. *Int J Nurs Stud* 2009;46(10):1386-400. doi: 10.1016/j.ijnurstu.2009.02.010
6. Daudt HM, van Mossel C, Scott SJ. Enhancing the scoping study methodology: a large, inter-professional team's experience with Arksey and O'Malley's framework. *BMC Med Res Methodol* 2013;13(1):48.
7. Arksey H, O'Malley L. Scoping studies: towards a methodological framework. *International Journal of Social Research Methodology* 2005;8(1):19-32. doi: 10.1080/1364557032000119616
8. Levac D, Colquhoun H, O'Brien KK. Scoping studies: advancing the methodology. *Implementation science* 2010;5(1):69.
9. Peters M, Godfrey C, Mclnerney P, et al. Chapter 11: Scoping Reviews. In: E A, Z M, eds. Joanna Briggs Institute Reviewer's Manual: The Joanna Briggs Institute 2017.
10. Tricco AC, Lillie E, Zarin W, et al. PRISMA extension for scoping reviews (PRISMA-ScR): checklist and explanation. *Ann Intern Med* 2018;169(7):467-73.
11. Stoffels M, Peerdeman SM, Daelmans HE, et al. Protocol for a scoping review on the conceptualisation of learning in undergraduate clinical nursing practice. *BMJ open* 2019;9(2):bmjopen-2018-024360.
12. Critical Appraisal Skills Programme. CASP Qualitative Checklist 2018 [Available from: <https://casp-uk.net/casp-tools-checklists/> accessed august 2018.
13. Buckley S, Coleman J, Davison I, et al. The educational effects of portfolios on undergraduate student learning: a Best Evidence Medical Education (BEME) systematic review. BEME Guide No. 11. *Med Teach* 2009;31(4):282-98.
14. McGowan J, Sampson M, Salzwedel DM, et al. PRESS Peer Review of Electronic Search Strategies: 2015 Guideline Statement. *J Clin Epidemiol* 2016;75:40-6. doi: 10.1016/j.jclinepi.2016.01.021
15. Dixon-Woods M, Agarwal S, Jones D, et al. Synthesising qualitative and quantitative evidence: a review of possible methods. *J Health Serv Res Policy* 2005;10(1):45-53. doi: 10.1177/135581960501000110 [published Online First: 2005/01/26]
16. Manninen K. Experiencing authenticity - the core of student learning in clinical practice. *Perspectives on medical education* 2016;5(5):308-11. doi: 10.1007/s40037-016-0294-0 [published Online First: 2016/09/18]
17. Manninen K, Henriksson EW, Scheja M, et al. Authenticity in Learning--Nursing Students' Experiences at a Clinical Education Ward. *Health Education* 2013;113(2):132-43.

18. Kear TM. An investigation of transformative learning experiences during associate degree nursing education using narrative methods. 2009;Ph.D.:141 p-41 p.
19. Kear TM. Transformative learning during nursing education: A model of interconnectivity. *Nurse education today* 2013;33(9):1083-87.
20. Burnard P. Student nurses' perceptions of experiential learning. *Nurse Educ Today* 1992;12(3):163-73. [published Online First: 1992/06/01]
21. Burnard P. Learning from experience: nurse tutors' and student nurses' perceptions of experiential learning in nurse education: some initial findings. *Int J Nurs Stud* 1992;29(2):151-61. [published Online First: 1992/05/01]
22. Green AJ, Holloway DG. Student Nurses' Experience of Experiential Teaching and Learning: Towards a Phenomenological Understanding. 1996;48:69-84.
23. Seylani K, Negarandeh R, Mohammadi E. Iranian undergraduate nursing student perceptions of informal learning: A qualitative research. *Iran J Nurs Midwifery Res* 2012;17(7):493-500.
24. Gidman J. Listening to stories: valuing knowledge from patient experience. *Nurse education in practice* 2013;13(3):192-6. doi: 10.1016/j.nepr.2012.09.006 [published Online First: 2012/10/23]
25. Baraz S, Memarian R, Vanaki Z. The diversity of Iranian nursing students' clinical learning styles: a qualitative study. *Nurse education in practice* 2014;14(5):525-31. doi: 10.1016/j.nepr.2014.03.004 [published Online First: 2014/04/16]
26. Carey MC, Chick A, Kent B, et al. An exploration of peer-assisted learning in undergraduate nursing students in paediatric clinical settings: An ethnographic study. *Nurse Educ Today* 2018;65:212-17. doi: 10.1016/j.nedt.2018.03.014
27. Dadgaran SA, Parvizy S, Peyrovi H. Passing through a rocky way to reach the pick of clinical competency: A grounded theory study on nursing students' clinical learning. *Iranian journal of nursing and midwifery research* 2012;17(5):330-7. [published Online First: 2013/07/16]
28. Grealish L, Ransie K. An exploratory study of first year nursing students' learning in the clinical workplace. *Contemp Nurse* 2009;33(1):80-92.
29. Mayson J, Hayward W. Learning to be a nurse. The contribution of the hidden curriculum in the clinical setting. *Nursing praxis in New Zealand inc* 1997;12(2):16-22. [published Online First: 1997/07/01]
30. Roberts D. Learning in clinical practice: the importance of peers. *Nursing standard (Royal College of Nursing (Great Britain) : 1987)* 2008;23(12):35-41. doi: 10.7748/ns2008.11.23.12.35.c6727 [published Online First: 2008/12/20]
31. Stockhausen LJ. Learning to become a nurse: students' reflections on their clinical experiences. *The Australian journal of advanced nursing : a quarterly publication of the Royal Australian Nursing Federation* 2005;22(3):8-14. [published Online First: 2006/02/28]
32. Windsor A. Nursing students' perceptions of clinical experience. *The Journal of nursing education* 1987;26(4):150-4. [published Online First: 1987/04/01]
33. Dornan T, Mann KV, Scherpbier AJ, et al. *Medical Education: Theory and Practice*: Elsevier Health Sciences 2011.
34. Yardley S, Teunissen PW, Dornan T. Experiential learning: AMEE Guide No. 63. *Med Teach* 2012;34(2):e102-15. doi: 10.3109/0142159X.2012.650741
35. Levett-Jones T, Lathlean J, Higgins I, et al. Staff-student relationships and their impact on nursing students' belongingness and learning. *J Adv Nurs* 2009;65(2):316-24.
36. Egan T, Jaye C. Communities of clinical practice: the social organization of clinical learning. *Health*: 2009;13(1):107-25.
37. Mann K, Gordon J, MacLeod A. Reflection and reflective practice in health professions education: a systematic review. *Advances in health sciences education* 2009;14(4):595.
38. Bleakley A. Broadening conceptions of learning in medical education: the message from teamworking. *Med Educ* 2006;40(2):150-57. doi: 10.1111/j.1365-2929.2005.02371.x
39. Kolb DA. *Experiential learning: Experience as the source of learning and development*: FT press 2014.

- 1  
2  
3 40. Koivisto J-M, Niemi H, Multisilta J, et al. Nursing students' experiential learning processes using  
4 an online 3D simulation game. *Education and Information Technologies* 2017;22(1):383-98.  
5 41. Chmil JV, Turk M, Adamson K, et al. Effects of an Experiential Learning Simulation Design on  
6 Clinical Nursing Judgment Development. *Nurse Educ* 2015;40(5):228-32. doi:  
7 10.1097/nne.000000000000159 [published Online First: 2015/03/13]  
8 42. McNelis AM, Ironside PM, Ebright PR, et al. Learning nursing practice: A multisite, multimethod  
9 investigation of clinical education. *Journal of Nursing Regulation* 2014;4(4):30-35.  
10 43. Newton JM, Henderson A, Jolly B, et al. A contemporary examination of workplace learning  
11 culture: an ethnomethodology study. *Nurse Educ Today* 2015;35(1):91-6. doi:  
12 10.1016/j.nedt.2014.07.001 [published Online First: 2014/07/30]  
13 44. Levett-Jones T, Lathlean J. The ascent to competence conceptual framework: an outcome of a  
14 study of belongingness. *J Clin Nurs* 2009;18(20):2870-79.  
15 45. Tynjälä P. Perspectives into learning at the workplace. *Educ Res Rev* 2008;3(2):130-54. doi:  
16 10.1016/j.edurev.2007.12.001  
17 46. Lawrence C, Mhlaba T, Stewart KA, et al. The Hidden Curricula of Medical Education: A Scoping  
18 Review. *Acad Med* 2017 doi: 10.1097/ACM.0000000000002004  
19 47. Mayson J, Hayward W. Learning to be a nurse. The contribution of the hidden curriculum in the  
20 clinical setting. *Nursing praxis in New Zealand inc* 1997;12(2):16-22.  
21 48. Billett S. Critiquing workplace learning discourses: Participation and continuity at work. *Studies in*  
22 *the Education of Adults* 2002;34(1):56-67.  
23 49. Wilkinson TJ. Kolb, integration and the messiness of workplace learning. *Perspectives on Medical*  
24 *Education* 2017:1-2.  
25 50. Coyle-Rogers P, Putman C. Using experiential learning: facilitating hands-on basic patient skills. *J*  
26 *Nurs Educ* 2006;45(4):142-3. [published Online First: 2006/04/25]  
27 51. Price B. Key principles in assessing students' practice-based learning. *Nurs Stand* 2012;26(49):49-  
28 55; quiz 56. doi: 10.7748/ns2012.08.26.49.49.c9236 [published Online First: 2012/08/31]  
29 52. Levett-Jones T, Lathlean J. Belongingness: a prerequisite for nursing students' clinical learning.  
30 *Nurse Educ Pract* 2008;8(2):103-11. doi: 10.1016/j.nepr.2007.04.003  
31 53. Ruggiano N, Perry TE. Conducting secondary analysis of qualitative data: Should we, can we, and  
32 how? *Qualitative Social Work: Research and Practice* 2017:147332501770070. doi:  
33 10.1177/1473325017700701  
34  
35  
36  
37  
38

## FUNDING

39 This research received no specific grant from any funding agency in the public, commercial or not-  
40 for-profit sectors.  
41  
42  
43

## COMPETING INTERESTS

44 The authors declare that they have no competing interests.  
45  
46

## CONTRIBUTORS

47 MS, RAK, HED, SP, JCFK contributed to the research idea and study design and edited and revised the  
48 paper. MS and JCFK developed the search strategy and executed the search. MS and RAK identified  
49 and agreed eligible papers and extracted the data. MS wrote the manuscript. RAK led the supervision  
50 of the project.  
51  
52  
53  
54  
55  
56  
57  
58

## PATIENT CONSENT

1  
2  
3 Not required.  
4  
5

## 6 DATA SHARING STATEMENT

7 The datasets generated during and/or analysed during the current study are available from the  
8 corresponding author on reasonable request.  
9  
10

## 11 FIGURES

12 Figure 1. Flow diagram article screening and selection search step 2  
13  
14  
15  
16  
17  
18  
19  
20  
21  
22  
23  
24  
25  
26  
27  
28  
29  
30  
31  
32  
33  
34  
35  
36  
37  
38  
39  
40  
41  
42  
43  
44  
45  
46  
47  
48  
49  
50  
51  
52  
53  
54  
55  
56  
57  
58  
59  
60

For peer review only

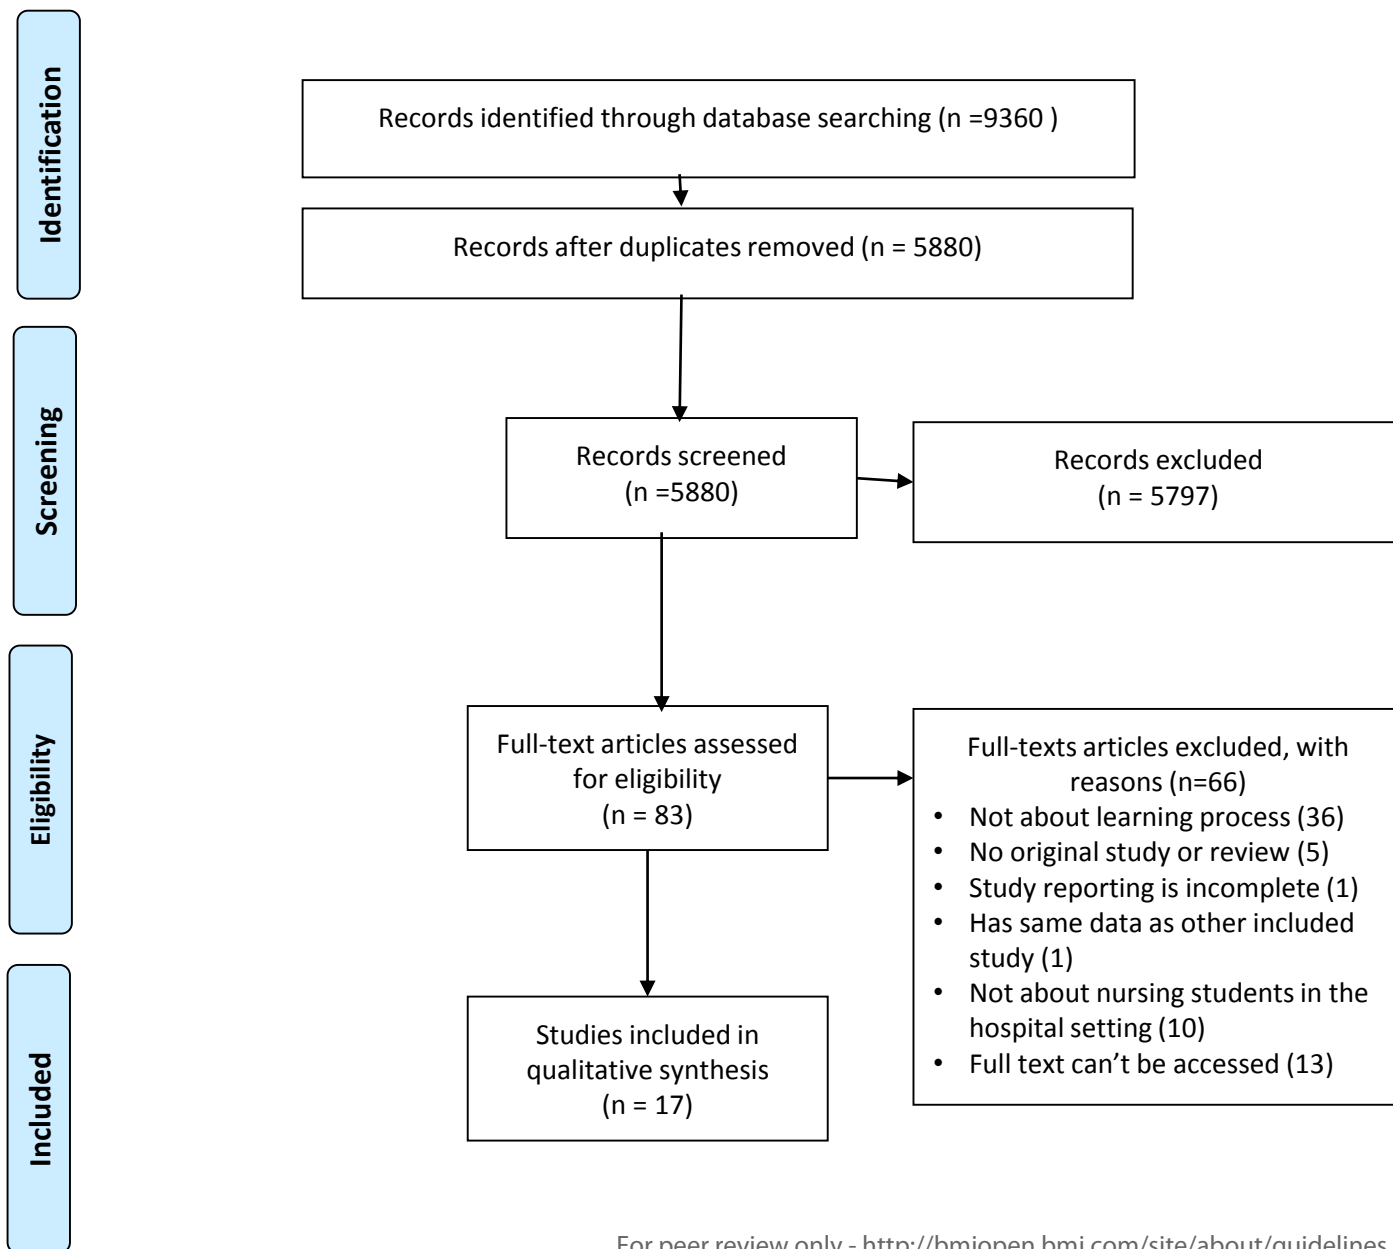

| LEARNING ACTIVITIES |                             |                        |                           |                        |
|---------------------|-----------------------------|------------------------|---------------------------|------------------------|
| Working as a nurse  | Interacting with ward staff | Interacting with peers | Interacting with patients | Processing information |

| OPERATIONALISATIONS                                                      |                                                                                                |                                                   |                                                                |
|--------------------------------------------------------------------------|------------------------------------------------------------------------------------------------|---------------------------------------------------|----------------------------------------------------------------|
| Interviews/narratives of students' experiences with learning in practice | Interviews/narratives of students' experiences of learning in practice focused on interactions | Observations of interactions involved in learning | Interviews about students' understanding of a specific concept |

| CONCEPTUALISATIONS                                                                                                                                                                                                                                                                                                             |                                                                                                                                                                                                                                    |                                                                                                                                                                                                                           |                                                                                                                                              |
|--------------------------------------------------------------------------------------------------------------------------------------------------------------------------------------------------------------------------------------------------------------------------------------------------------------------------------|------------------------------------------------------------------------------------------------------------------------------------------------------------------------------------------------------------------------------------|---------------------------------------------------------------------------------------------------------------------------------------------------------------------------------------------------------------------------|----------------------------------------------------------------------------------------------------------------------------------------------|
| Concepts synonym for practice learning                                                                                                                                                                                                                                                                                         | Concepts concerning social learning                                                                                                                                                                                                | Concepts appreciating the unconscious, unplanned nature of clinical learning                                                                                                                                              | Concepts appreciating the active role of students                                                                                            |
| <ul style="list-style-type: none"> <li>• <i>Clinical learning experience</i></li> <li>• <i>Workplace learning</i></li> <li>• <i>Clinical learning</i></li> <li>• <i>Learning in the clinical workplace</i></li> <li>• <i>Experiences of learning at a clinical ward</i></li> <li>• <i>Learning in the workplace</i></li> </ul> | <ul style="list-style-type: none"> <li>• <i>Peer learning</i></li> <li>• <i>Peer assisted learning</i></li> <li>• <i>Learning from patient stories</i></li> <li>• <i>Learning in relation to encounters with others</i></li> </ul> | <ul style="list-style-type: none"> <li>• <i>Experiential learning</i></li> <li>• <i>Informal learning</i></li> <li>• <i>Learning from the hidden curriculum</i></li> <li>• <i>Informal on the job learning</i></li> </ul> | <ul style="list-style-type: none"> <li>• <i>Learning styles in the clinical setting</i></li> <li>• <i>Transformative learning</i></li> </ul> |



## PRISMA-ScR Checklist

| Section/topic                                        | #  | Checklist item                                                                                                                                                                                                                                                                                                    | Reported on page #       |
|------------------------------------------------------|----|-------------------------------------------------------------------------------------------------------------------------------------------------------------------------------------------------------------------------------------------------------------------------------------------------------------------|--------------------------|
| <b>TITLE</b>                                         |    |                                                                                                                                                                                                                                                                                                                   |                          |
| Title                                                | 1  | Identify the report as a scoping review.                                                                                                                                                                                                                                                                          | 1                        |
| <b>ABSTRACT</b>                                      |    |                                                                                                                                                                                                                                                                                                                   |                          |
| Structured summary                                   | 2  | Provide a structured summary that includes (as applicable) background, objectives, eligibility criteria, sources of evidence, charting methods, results, and conclusions that relate to the review questions and objectives.                                                                                      | 2                        |
| <b>INTRODUCTION</b>                                  |    |                                                                                                                                                                                                                                                                                                                   |                          |
| Rationale                                            | 3  | Describe the rationale for the review in the context of what is already known. Explain why the review questions or objectives lend themselves to a scoping review approach.                                                                                                                                       | 3                        |
| Objectives                                           | 4  | Provide an explicit statement of the questions and objectives being addressed with reference to their key elements (for example, population or participants, concepts, and context) or other relevant key elements used to conceptualize the review questions or objectives.                                      | 3                        |
| <b>METHODS</b>                                       |    |                                                                                                                                                                                                                                                                                                                   |                          |
| Protocol and registration                            | 5  | Indicate whether a review protocol exists; state if and where it can be accessed (for example, a Web address); and if available, provide registration information, including the registration number.                                                                                                             | 4                        |
| Eligibility criteria                                 | 6  | Specify characteristics of the sources of evidence used as eligibility criteria (for example, years considered, language, and publication status), and provide a rationale.                                                                                                                                       | 5                        |
| Information sources                                  | 7  | Describe all information sources in the search (for example, databases with dates of coverage and contact with authors to identify additional sources), as well as the date the most recent search was executed.                                                                                                  | 4 + supplementary file 3 |
| Search                                               | 8  | Present the full electronic search strategy for at least 1 database, including any limits used, such that it could be repeated.                                                                                                                                                                                   | Supplementary file 3     |
| Selection of sources of evidence                     | 9  | State the process for selecting sources of evidence (that is, screening and eligibility) included in the scoping review.                                                                                                                                                                                          | 5                        |
| Data charting process                                | 10 | Describe the methods of charting data from the included sources of evidence (for example, calibrated forms or forms that have been tested by the team before their use, and whether data charting was done independently or in duplicate) and any processes for obtaining and confirming data from investigators. | 6                        |
| Data items                                           | 11 | List and define all variables for which data were sought and any assumptions and simplifications made.                                                                                                                                                                                                            | 6                        |
| Critical Appraisal of Individual Sources of Evidence | 12 | Describe methods used for assessing risk of bias of individual studies (including specification of whether this was done at the study or outcome level), and how this information is to be used in any data synthesis.                                                                                            | 6                        |
| Summary measures                                     | 13 | State the principal summary measures (e.g., risk ratio, difference in means).                                                                                                                                                                                                                                     | N/A                      |
| Synthesis of results                                 | 14 | Describe the methods of handling and summarizing the data that were charted.                                                                                                                                                                                                                                      | 6                        |





## PRISMA-ScR Checklist

1  
2  
3  
4  
5  
6  
7  
8  
9  
10  
11  
12  
13  
14  
15  
16  
17  
18  
19  
20  
21  
22  
23  
24  
25  
26  
27  
28  
29  
30  
31  
32  
33  
34  
35  
36  
37  
38  
39  
40  
41  
42  
43  
44  
45  
46  
47

|                                               |    |                                                                                                                                                                                                 |       |
|-----------------------------------------------|----|-------------------------------------------------------------------------------------------------------------------------------------------------------------------------------------------------|-------|
| Risk of bias across studies                   | 15 | Specify any assessment of risk of bias that may affect the cumulative evidence (e.g., publication bias, selective reporting within studies).                                                    | N/A   |
| Additional analyses                           | 16 | Describe methods of additional analyses (e.g., sensitivity or subgroup analyses, meta-regression), if done, indicating which were pre-specified.                                                | N/A   |
| <b>RESULTS</b>                                |    |                                                                                                                                                                                                 |       |
| Selection of Sources of Evidence              | 17 | Give numbers of sources of evidence screened, assessed for eligibility, and included in the review, with reasons for exclusions at each stage, ideally using a flow diagram.                    | 7     |
| Characteristics of Sources of Evidence        | 18 | For each source of evidence, present characteristics for which data were charted and provide the citations.                                                                                     | 7     |
| Critical Appraisal Within Sources of Evidence | 19 | If done, present data on critical appraisal of included sources of evidence (see item 12).                                                                                                      | 7-8   |
| Results of Individual Sources of Evidence     | 20 | For each included source of evidence, present the relevant data that were charted that relate to the review questions and objectives.                                                           | 9-18  |
| Synthesis of results                          | 21 | Summarize or present the charting results as they relate to the review questions and objectives.                                                                                                | 19-21 |
| Risk of bias across studies                   | 22 | Present results of any assessment of risk of bias across studies (see Item 15).                                                                                                                 | N/A   |
| Additional analysis                           | 23 | Give results of additional analyses, if done (e.g., sensitivity or subgroup analyses, meta-regression [see Item 16]).                                                                           | N/A   |
| <b>DISCUSSION</b>                             |    |                                                                                                                                                                                                 |       |
| Summary of evidence                           | 24 | Summarize the main results (including an overview of concepts, themes, and types of evidence available), link to the review questions and objectives, and consider the relevance to key groups. | 22    |
| Limitations                                   | 25 | Discuss the limitations of the scoping review process.                                                                                                                                          | 23    |
| Conclusions                                   | 26 | Provide a general interpretation of the results with respect to the review questions and objectives, as well as potential implications or next steps.                                           | 24    |
| <b>FUNDING</b>                                |    |                                                                                                                                                                                                 |       |
| Funding                                       | 27 | Describe sources of funding for the included sources of evidence, as well as sources of funding for the scoping review. Describe the role of the funders of the scoping review.                 | 26    |

From: Tricco AC, Lillie E, Zarin W, O'Brien KK, Colquhoun H, Levac D, Moher D, Peters MDJ, Horsley T, Weeks L, Hempel S, Akl EA, Chang C, McGowan J, Stewart L, Hartling L, Aldcroft A, Wilson MG, Garritty C, Lewin S, Godfrey CM, Macdonald MT, Langlois EV, Soares-Weiser K, Moriarty J, Clifford T, Tunçalp Ö, Straus SE. PRISMA Extension for Scoping Reviews (PRISMA-ScR): Checklist and Explanation. *Ann Intern Med.* 2018.

# Protocol for a scoping review on the conceptualization of learning in undergraduate clinical nursing practice

Malou Stoffels, MSc<sup>1,2</sup>; Saskia M. Peerdeman, MD, PhD<sup>1,3</sup>; Hester E. Daelmans, MD, PhD<sup>1,4</sup>; Johannes C.F. Ket<sup>5</sup>; Rashmi A. Kusurkar, MD, PhD<sup>1,6</sup>.

## Correspondence

Correspondence should be addressed to Malou Stoffels, VUmc, Department of Research in Education, PO box 7057, 1007 MB Amsterdam, the Netherlands; telephone: +31204446241; e-mail: m.stoffels@vumc.nl;

<sup>1</sup> Department of Research in Education, VUmc School of Medical Sciences, Amsterdam UMC, Amsterdam, the Netherlands

<sup>2</sup>VUmc Amstel Academy, VU University Medical Center, Amsterdam UMC, Amsterdam, the Netherlands

<sup>3</sup>Department of neurosurgery, VU University Medical Center, Amsterdam UMC, Amsterdam, the Netherlands<sup>2</sup>

<sup>4</sup>Department of skills training, VUmc School of Medical Sciences, Amsterdam UMC, Amsterdam, the Netherlands

<sup>5</sup>Medical Library, Vrije Universiteit, Amsterdam, The Netherlands

<sup>6</sup>LEARN! research institute for learning and education, Faculty of Psychology and Education, VU University Amsterdam, the Netherlands.

## Word count

2385

## Key words

Undergraduate nursing education, learning in practice

## ABSTRACT

**Introduction:** Learning in the clinical setting is a major form of learning in undergraduate nursing education. In spite of this, how nursing students learn in clinical practice is still largely unknown. Moreover, there is no conceptual clarity on learning in practice in the current literature. This paper aims to set up a protocol for a scoping review of the literature in order to map different conceptualizations of learning in undergraduate clinical nursing practice in the hospital setting. The operationalisations of different concepts will be compared and the findings of the studies will be synthesized.

**Methods and analysis:** This scoping review will be guided by the methodological framework proposed by Arksey and O'Malley and refined by Levac et al. and the Joanna Briggs institute. The search strategy will be developed together with a medical information specialist and the search will be performed in electronic databases (PubMed, EBSCO/ERIC and EBSCO/CINAHL). In a first search, we will identify concepts that are used as an equivalent to learning in practice. Next we will search for studies operationalizing these concepts in undergraduate nursing education. Finally, we will check reference lists for additional publications. Abstracts and full-text studies will independently be screened by two researchers. All studies that have 'learning in undergraduate clinical nursing practice' as their main topic and that include a definition of operationalization of an equivalent to learning in clinical practice, will be considered for inclusion. We will chart different conceptualisations and their theoretical underpinnings, as well as reported learning opportunities, informal and formal aspects of learning, social aspects of learning and gaps in the literature.

**Ethics and dissemination:** This review will help design future studies on learning in clinical nursing practice using well-defined and agreed upon terminology. The results will be disseminated through journal publications and conference presentations.

## ARTICLE SUMMARY

### Strengths and limitations of this study

- This protocol outlines a rigorous design that includes an established research framework, a search strategy and a selection process.
- The search strategy includes different databases with peer-reviewed literature, with no restrictions to the study design or the publication date.
- The assessment of the quality of the included papers will enable identifying gaps in the literature.

- A limitation is that the literature search will only cover undergraduate nursing education, while a comparison with literature on learning in practice in other health professions would enrich our understanding of potential conceptualizations.
- This study will not include books or grey literature, which will allow us to map how learning in practice is conceptualized in original research.

## INTRODUCTION

Learning in the clinical setting is crucial for becoming a competent nurse<sup>1</sup>. However, how nursing students learn in clinical practice is still largely unknown. A vast body of knowledge exists on factors that influence learning, but the process itself remains underexposed<sup>4</sup>. For example, there is a lack of insight into how individual learning outcomes can be predicted, or which learning opportunities best promote students' learning<sup>5</sup>. Understanding learning in the clinical setting can help design, supervise and evaluate individual learning trajectories and their outcomes in practice. This study aims to set up a protocol for a scoping review to examine how different concepts that are equivalent to 'learning in practice' are used and operationalized in the literature, and what these studies add to our understanding of learning in the clinical setting

In the educational literature, the concept of 'learning in practice' has been widely studied in the context of workplace learning by professionals<sup>6</sup> or practice learning by students<sup>7</sup>. However, there is no unified definition or approach towards this concept<sup>8</sup>. Two main characteristics of clinical learning can be clearly distinguished in the literature. First, learning in practice is often distinguished from learning in the classroom setting as informal opposed to formal learning, where informal learning arises in situations where learning is not the primary aim<sup>9</sup>. However, some authors question the validity of a dichotomy between formal and informal learning<sup>10</sup>, and state that every learning situation contains both formal and informal elements<sup>11</sup>. This would particularly apply to clinical learning, which is characterized by a constant interplay of the 'reality' of clinical practice and formal learning interventions such as feedback and assessment<sup>12</sup>. Another essential characteristic of workplace learning is its social rather than individual nature<sup>13</sup>. That is, learning occurs in interaction and dialogue with others<sup>9</sup>.

In the nursing education literature, just as in other health professions education literature, different terms are used to describe and study learning in clinical practice, with different theoretical underpinnings. Moreover, the rationale behind the application of the concepts used is not always explained. Therefore, it is not always clear whether these different terms refer to the same concept, and how they are defined in terms of learning content (skills, knowledge, values), process (implicit,

1  
2  
3 explicit), control (intended or unintended, guided or not guided) and learning outcomes. Also,  
4 different researchers appear to apply the same concept differently. Having clear and agreed upon  
5 terminology can help design future studies that can contribute to understanding learning in clinical  
6 practice along with its limitations so that nursing wards can be organized for optimal benefit of the  
7 students.  
8  
9

10  
11  
12 The goal of this scoping review is to provide guidance for the use of concepts that describe learning  
13 in undergraduate clinical nursing practice in future studies. This study therefore aims to examine how  
14 different concepts that are equivalent to 'learning in practice' are used and operationalized in the  
15 literature. Therefore, we will look for studies that examine how learning in the clinical setting takes  
16 place. To enable comparison of the use of different concepts, we will focus on the general hospital  
17 setting. This context is the traditional setting for nursing training and comprises a variety of factors  
18 that may be relevant for learning, such as the presence of registered nurses, peers, and other  
19 professionals, as well as complex and acute patients, thereby offering a wide array of  
20 multidimensional learning opportunities<sup>14</sup>. We will particularly consider how formal and informal  
21 aspects of learning, as well as the social component of learning are included in these  
22 operationalisations. We will synthesize the results relating to how students learn in clinical practice.  
23  
24  
25  
26  
27  
28  
29  
30

31 A body of work on concepts to describe learning in practice does exist outside nursing education  
32 literature<sup>15</sup>. To our knowledge, the only study that included distinct concepts of learning in clinical  
33 practice in a review before, was a concept analysis of work-based learning in health care education  
34 by Manley, et al.<sup>16</sup>. The authors identified common attributes, enabling factors and consequences of  
35 workplace learning and proposed a definition. The current review will build on this work by closely  
36 examining different concepts of learning in practice in the context of undergraduate nursing  
37 education, as well as comparing how they are used to study clinical learning. This will enable us to  
38 address gaps in the literature as well as make suggestions for the use of terminology in future studies  
39 Also, the current study will include literature after 2009 when Manley, et al.<sup>16</sup> conducted their study.  
40 In interpreting our findings, we will consider the broader body of literature on learning in practice.  
41  
42  
43  
44  
45  
46  
47  
48

## 49 **METHODS AND ANALYSIS**

50  
51  
52 We decided to use the scoping review approach to map the different concepts that are used to study  
53 learning in clinical nursing practice as well as the way they are operationalised and the information  
54 they provide about how students learn in the clinical setting. Since the lack of a focused line of  
55 inquiry requires a broad research question, we consider a scoping review to be more appropriate  
56 than a systematic review. Scoping can help understand complex concepts through clarifying  
57  
58  
59  
60

1  
2  
3 definitions and conceptual boundaries<sup>17</sup>. Scoping will also enable us to identify key concepts, gaps in  
4 the literature, and types and sources of evidence to inform practice, policymaking, and research<sup>18</sup>. To  
5 get a comprehensive picture of the existing research, we will include studies with different designs.  
6 Since scoping reviews are hypothesis-generating rather than hypothesis-testing, this review can  
7 provide a stepping off point for further research.  
8  
9

10  
11  
12 Standardized reporting guidelines can help the critical appraisal of reviews and thereby increase their  
13 reproducibility, completeness, and transparency<sup>19</sup>. For systematic reviews, the PRISMA-P checklist  
14 has been developed to facilitate the preparation of a robust research protocol<sup>20</sup>. PRISMA guidelines  
15 for scoping reviews are still under development<sup>21</sup>. We therefore used relevant items of the PRISMA-P  
16 (Preferred Reporting Items for Systematic Reviews and Meta-analysis Protocols) to draft this  
17 protocol, as outlined in additional file 1.  
18  
19  
20  
21

22  
23 To ensure rigor in reporting the methodology, we will use the six-stage approach developed by  
24 Arksey and O'Malley<sup>22</sup> and refined by Levac, et al.<sup>23</sup> and the Joanna Briggs institute<sup>24</sup> (1) identifying  
25 the research question; (2) identifying relevant studies; (3) selecting studies; (4) charting the data; (5)  
26 collating, summarizing and reporting the results; (6) expert consultation (optional and included).  
27  
28  
29  
30  
31

### 32 *Stage 1. Identifying the research question*

33  
34 Since our aim is to understand how learning in undergraduate clinical nursing practice is  
35 conceptualized in the current literature irrespective of research design and outcome, our research  
36 question is:  
37  
38  
39

- 40 • How are different concepts that are used as an equivalent to learning in the hospital setting  
41 operationalized in the undergraduate nursing education literature?  
42  
43  
44

45 As scoping is an iterative process<sup>22</sup>, we might add additional questions based on our findings along  
46 the review process. While the eventual goal of this study is to contribute to the understanding of the  
47 process of nursing students' learning in practice, we will also synthesize results that are relevant to  
48 this topic.  
49  
50  
51

### 52 *Stage 2. Identify relevant studies*

53  
54 The search strategy will be iteratively developed by the research team. As suggested by the Joanna  
55 Briggs institute<sup>24</sup>, we will start with a very broad search to inform our subsequent search strategy. A  
56 comprehensive search strategy will be developed (by MS and JCFK) to conduct this stepwise search  
57  
58  
59  
60

1  
2  
3 process following the Peer Review of Electronic Search Strategies (PRESS) 2015 guideline statement  
4  
5<sup>25</sup>.

6  
7 In an initial search (search step 1), we will combine the terms 'learning in clinical practice' and  
8  
9 'undergraduate nursing students'. The search query for both steps will first be developed for  
10  
11 PubMed and later extended to EBSCO/ERIC and EBSCO/CINAHL to identify different concepts in the  
12  
13 literature that are used as an equivalent to 'learning in clinical practice' by nursing students. See our  
14  
15 draft search in the additional file 2 for step 1 of our search. The first 100 search results from each  
16  
17 database will be reviewed by the researchers to assess validity of the search strategy. When  
18  
19 agreement has been reached about the initial search strategy, the first 200 abstracts will be scanned  
20  
21 by the two reviewers (MS and RAK) on concepts potentially eligible for inclusion in the second search  
22  
23 step. Eligible concepts are concepts that describe the process of learning to become a nurse within  
24  
25 the clinical context ('such as 'experiential learning' or 'informal learning'), rather than specific aspects  
26  
27 or (such as 'skill acquisition' or 'peer learning'). In case of full agreement between the two reviewers  
28  
29 on potentially eligible concepts, the first reviewer will screen the rest of the abstracts. In case of  
30  
31 disagreement, the second author will scan another 200 abstracts until full agreement is reached.  
32  
33 After all abstracts have been screened, the two reviewers will discuss all potentially eligible concepts  
34  
35 and select concepts to be included in the second search step.

36  
37 After having selected the different concepts, we will develop a search query (search step 2) in  
38  
39 PubMed and subsequently extend to EBSCO/ERIC and EBSCO/CINAHL combining each of the  
40  
41 identified concepts with 'undergraduate nursing' to find studies operationalizing one of the identified  
42  
43 concepts in the literature on nursing students' learning in the hospital setting.

44  
45 After these two searches, we will check reference lists for additional publications (See figure 1 for a  
46  
47 flow diagram of the search and selection process). We will conduct the two searches in June 2018.

### 48 *Stage 3. Study selection*

49  
50 Following the second step of our search strategy, two independent researchers will screen abstracts  
51  
52 and assess the eligibility for full text retrieval. Selected full-text studies will again be compared  
53  
54 between the reviewers with disagreement being resolved through discussion and consensus and  
55  
56 with input from the full research team.

57  
58 The inclusion criteria will be developed in an iterative process in which the reviewers calibrate a  
59  
60 threshold for inclusion and exclusion. The initial inclusion criteria will be:

- Original research or reviews in peer reviewed journals that have learning in undergraduate clinical nursing practice in the hospital setting as one of their main topics, regardless of publication date and type of article.
- Studies that examine how students learn in the clinical hospital setting

Since we are interested in how learning in practice is operationalized in peer-reviewed research, we exclude books, book reviews, commentaries, letters to the editor, PhD theses, and reports. Reasons for exclusion will be documented at the full-text review stage.

#### *Stage 4. Charting the data*

Data will be extracted from full-text journal articles which meet the aforementioned inclusion criteria. A draft analytic frame is developed to document selected studies into an excel spreadsheet, including study characteristics (year, country, methodology, study question, study design, participants, outcomes, study quality), conceptualization of learning in practice (definitions, theoretical underpinnings/rationale, operationalisations, formal/informal aspects of learning, social interactions, learning opportunities) and reported gaps in the literature. Other categories that come during the data extraction progress will be discussed in the research team and added to the data extraction form. Although formal assessment of study quality is generally not performed in scoping reviews<sup>24</sup>, some claim it should be incorporated in the methodology<sup>18</sup>. Assessing study quality will enable us to address not only quantitative, but also qualitative gaps in the literature<sup>23</sup>. We will therefore assess the quality of included studies by a set of quality indicators for reviews developed by Buckley, et al.<sup>26</sup>. The form will be piloted on 5–10 articles by the team and will allow us to analyse the selected articles through a common framework.

We will document studies that are not selected for full text retrieval in a separate file. To ensure accurate data collection, each reviewer's independent charted data will be compared and any discrepancies will be iteratively discussed by the researchers to ensure consistency between the reviewers.

#### *Stage 5. Collating, summarizing and reporting results*

A PRISMA flow diagram will be used to report final numbers in the resulting study publication. As we expect a diverse body of knowledge, we will give a descriptive account of concepts and subsequent operationalizations. We will synthesise study findings using narrative descriptions based on themes that emerge from the extracted data. The results will be compared and consolidated through consensus between two of the r MS and RAK.



1  
2  
3 We will address both quantitative and qualitative gaps in the literature. We will discuss the data in  
4 the light of relevant theories on workplace learning both in and outside nursing education literature  
5 and make suggestions for the operationalization of learning in practice for future studies.  
6  
7

#### 8 9 *Stage 6. Expert consultation*

10  
11 In order to confirm our findings and interpretations, two nurse educators, with experience in  
12 scientific research and expertise on learning in clinical practice, will be approached for consultation.  
13  
14

### 15 16 **ETHICS AND DISSEMINATION**

17  
18 This scoping review will be the first study to compare terminology used for learning in undergraduate  
19 nursing clinical practice and thereby will contribute to the design and comparison of future studies in  
20 this field. This protocol reports a comprehensive, rigorous and transparent methodology. The results  
21 will be disseminated through a peer-reviewed publication and national and international conferences  
22 such as the AMEE (Association of Medical Education in Europe) conference, targeting an audience  
23 involved in undergraduate nursing education. By identifying gaps in the current body of literature,  
24 this study can guide future nursing education research. Both the methodology and the results may be  
25 of interest for researchers and educators in other health professions than nursing, given the widely  
26 spread importance of learning in clinical practice. Since the methodology applied consists of  
27 reviewing and collecting data from publicly available materials, this study does not require an ethical  
28 approval.  
29  
30  
31  
32  
33  
34  
35  
36  
37

### 38 39 **PATIENT AND PUBLIC INVOLVEMENT**

- 40  
41 - *How was the development of the research question and outcome measures informed*  
42 *by patients' priorities, experience, and preferences?* As education is essential for  
43 improving patient care, patients will eventually benefit from the body of knowledge  
44 this study contributes to. However, specific interests of patients have not been  
45 examined.  
46  
47 - *How did you involve patients in the design of this study?* Patients have not been  
48 involved in the study.  
49  
50 - *Were patients involved in the recruitment to and conduct of the study?* No.  
51 *How will the results be disseminated to study participants?* As this concerns a review,  
52 this study has no participants.  
53  
54 - *For randomised controlled trials, was the burden of the intervention assessed by*  
55 *patients themselves?* Not applicable  
56  
57 - *Patient advisers should also be thanked in the contributorship*  
58 *statement/acknowledgements.* Not applicable  
59  
60 - *If patients and or public were not involved please state this.* Not applicable

## REFERENCES

1. Cope P, Cuthbertson P, Stoddart B. Situated learning in the practice placement. *J Adv Nurs* 2000;31(4):850-56.
2. Egan T, Jaye C. Communities of clinical practice: the social organization of clinical learning. *Health*: 2009;13(1):107-25.
3. Henderson A, Cooke M, Creedy DK, et al. Nursing students' perceptions of learning in practice environments: a review. *Nurse Educ Today* 2012;32(3):299-302. doi: 10.1016/j.nedt.2011.03.010 [published Online First: 2011/04/26]
4. Flott EA, Linden L. The clinical learning environment in nursing education: a concept analysis. *J Adv Nurs* 2016;72(3):501-13. doi: 10.1111/jan.12861
5. Ironside PM, McNelis AM, Ebricht P. Clinical education in nursing: rethinking learning in practice settings. *Nurs Outlook* 2014;62(3):185-91. doi: 10.1016/j.outlook.2013.12.004
6. Billett S. Learning through work: workplace affordances and individual engagement. *J Workplace Learn* 2001;13(5):209-14. doi: 10.1108/eum0000000005548
7. Guile D, Griffiths T. Learning Through Work Experience. *J Educ Work* 2001;14(1):113-31. doi: 10.1080/13639080020028738
8. Manuti A, Pastore S, Scardigno AF, et al. Formal and informal learning in the workplace: a research review. *Int J Train Dev* 2015;19(1):1-17.
9. Tynjälä P. Perspectives into learning at the workplace. *Educ Res Rev* 2008;3(2):130-54. doi: 10.1016/j.edurev.2007.12.001
10. Billett S. Critiquing workplace learning discourses: Participation and continuity at work. *Studies in the Education of Adults* 2002;34(1):56-67.
11. Janssens L, Smet K, Onghena P, et al. The relationship between learning conditions in the workplace and informal learning outcomes: a study among police inspectors. *Int J Train Dev* 2016
12. Andrews GJ, Brodie DA, Andrews JP, et al. Professional roles and communications in clinical placements: a qualitative study of nursing students' perceptions and some models for practice. *Int J Nurs Stud* 2006;43(7):861-74.
13. Eraut M. Informal learning in the workplace. *Stud Cont Educ* 2004;26(2):247-73. doi: 10.1080/158037042000225245
14. Bisholt B, Ohlsson U, Engstrom AK, et al. Nursing students' assessment of the learning environment in different clinical settings. *Nurse Educ Pract* 2014;14(3):304-10. doi: 10.1016/j.nepr.2013.11.005 [published Online First: 2013/12/21]
15. Billett S. Mimesis: Learning Through Everyday Activities and Interactions at Work. *Hum Resource Dev Rev* 2014;13(4):462-82. doi: 10.1177/1534484314548275
16. Manley K, Titchen A, Hardy S. Work-based learning in the context of contemporary health care education and practice: A concept analysis. *Pract Dev Health Care* 2009;8(2):87-127. doi: 10.1002/pdh.284
17. Davis K, Drey N, Gould D. What are scoping studies? A review of the nursing literature. *Int J Nurs Stud* 2009;46(10):1386-400. doi: 10.1016/j.ijnurstu.2009.02.010
18. Daudt HM, van Mossel C, Scott SJ. Enhancing the scoping study methodology: a large, inter-professional team's experience with Arksey and O'Malley's framework. *BMC Med Res Methodol* 2013;13(1):48.
19. Colquhoun HL, Levac D, O'Brien KK, et al. Scoping reviews: time for clarity in definition, methods, and reporting. *J Clin Epidemiol* 2014;67(12):1291-4. doi: 10.1016/j.jclinepi.2014.03.013
20. Moher D, Shamseer L, Clarke M, et al. Preferred reporting items for systematic review and meta-analysis protocols (PRISMA-P) 2015 statement. *Syst Rev* 2015;4(1):1.

- 1  
2  
3 21. Tricco A, Straus S, Moher D. Preferred reporting items for systematic reviews and meta-analysis:  
4 extension for Scoping Reviews (PRISMA-ScR). *EQUATOR Netw* [http://www.equator-network](http://www.equator-network.org/wp-content/uploads/2009/02/Executive-summary_ScR_Dec-9.pdf)  
5 *org/wp-content/uploads/2009/02/Executive-summary\_ScR\_Dec-9.pdf* (accessed 20 May  
6 2017) 2017  
7  
8 22. Arksey H, O'Malley L. Scoping studies: towards a methodological framework. *International*  
9 *Journal of Social Research Methodology* 2005;8(1):19-32. doi:  
10 10.1080/1364557032000119616  
11 23. Levac D, Colquhoun H, O'Brien KK. Scoping studies: advancing the methodology. *Implementation*  
12 *science* 2010;5(1):69.  
13 24. Peters M, Godfrey C, McInerney P, et al. Chapter 11: Scoping Reviews. In: E A, Z M, eds. Joanna  
14 Briggs Institute Reviewer's Manual: The Joanna Briggs Institute 2017.  
15 25. McGowan J, Sampson M, Salzwedel DM, et al. PRESS Peer Review of Electronic Search Strategies:  
16 2015 Guideline Statement. *J Clin Epidemiol* 2016;75:40-6. doi: 10.1016/j.jclinepi.2016.01.021  
17 26. Buckley S, Coleman J, Davison I, et al. The educational effects of portfolios on undergraduate  
18 student learning: a Best Evidence Medical Education (BEME) systematic review. BEME Guide  
19 No. 11. *Med Teach* 2009;31(4):282-98.  
20  
21  
22  
23

#### 24 **AUTHOR STATEMENT**

25  
26  
27 MS and RAK were responsible for the initial design of this study MS, HED, RAK, SP, JCFK, contributed  
28 to the development of the eligibility and data extraction criteria JCFK, MS, HED, RAK, developed and  
29 executed the search strategy. MS and RAK are responsible for abstract and full-text screening. MS  
30 conceptualized the review approach and led the writing of the manuscript. MS, RAK, HED, SP, JCFK  
31 contributed and approved the final version of this protocol. RAK led the supervision of the  
32 manuscript preparation.  
33  
34  
35  
36  
37

#### 38 **FUNDING**

39  
40  
41 This research received no specific grant from any funding agency in the public, commercial or not-  
42 for-profit sectors.  
43  
44

#### 45 **CONFLICT OF INTERESTS**

46  
47  
48 The authors declare that they have no competing interests.  
49  
50  
51  
52  
53  
54  
55  
56  
57  
58  
59  
60

1  
2  
3  
4  
5  
6  
7  
8  
9  
10  
11  
12  
13  
14  
15  
16  
17  
18  
19  
20  
21  
22  
23  
24  
25  
26  
27  
28  
29  
30  
31  
32  
33  
34  
35  
36  
37  
38  
39  
40  
41  
42  
43  
44  
45  
46

**Supplementary file 3. Draft search strategy step 1 and 2**

**1. Search strategy step 1**

**PubMed (9 May 2018)**

| Search | Query                                                                                                                                                                                                                                                                                                                                                                                           | Items found |
|--------|-------------------------------------------------------------------------------------------------------------------------------------------------------------------------------------------------------------------------------------------------------------------------------------------------------------------------------------------------------------------------------------------------|-------------|
| #1     | "Students, Nursing"[Mesh] OR "Internship, Nonmedical"[Mesh:noexp] OR (nursing[tiab] AND student*[tiab]) OR ((nursing[tiab] OR nurse[tiab] OR nurses[tiab]) AND internship*[tiab])) AND (((("Clinical Competence"[Mesh] OR "Clinical Medicine"[Majr] OR clinical*[ti] OR clinical*[ot] OR practice*[ti] OR practice[ot]) AND ("Learning"[Mesh] OR learning*[tiab])) OR clinical learning*[tiab]) | 3,586       |

**Ebsco/ERIC (9 May 2018)**

| Search | Query                                                                                                                                                                                                                                                                                                                                                                                                                                                                                                                                                                                                                                                                                                                                                                                                                                                                                                                                                                                                                                                                                                                                                                                                                                                                                                                                                                                                                                                                                                                                                                                                                                                                                                                                                                                                                                                                                                                                                          | Items found |
|--------|----------------------------------------------------------------------------------------------------------------------------------------------------------------------------------------------------------------------------------------------------------------------------------------------------------------------------------------------------------------------------------------------------------------------------------------------------------------------------------------------------------------------------------------------------------------------------------------------------------------------------------------------------------------------------------------------------------------------------------------------------------------------------------------------------------------------------------------------------------------------------------------------------------------------------------------------------------------------------------------------------------------------------------------------------------------------------------------------------------------------------------------------------------------------------------------------------------------------------------------------------------------------------------------------------------------------------------------------------------------------------------------------------------------------------------------------------------------------------------------------------------------------------------------------------------------------------------------------------------------------------------------------------------------------------------------------------------------------------------------------------------------------------------------------------------------------------------------------------------------------------------------------------------------------------------------------------------------|-------------|
| S7     | S1 AND S6                                                                                                                                                                                                                                                                                                                                                                                                                                                                                                                                                                                                                                                                                                                                                                                                                                                                                                                                                                                                                                                                                                                                                                                                                                                                                                                                                                                                                                                                                                                                                                                                                                                                                                                                                                                                                                                                                                                                                      | 408         |
| S6     | S4 OR S5                                                                                                                                                                                                                                                                                                                                                                                                                                                                                                                                                                                                                                                                                                                                                                                                                                                                                                                                                                                                                                                                                                                                                                                                                                                                                                                                                                                                                                                                                                                                                                                                                                                                                                                                                                                                                                                                                                                                                       | 70,505      |
| S5     | TI ("clinical learning*") OR AB ("clinical learning*")                                                                                                                                                                                                                                                                                                                                                                                                                                                                                                                                                                                                                                                                                                                                                                                                                                                                                                                                                                                                                                                                                                                                                                                                                                                                                                                                                                                                                                                                                                                                                                                                                                                                                                                                                                                                                                                                                                         | 84          |
| S4     | S2 AND S3                                                                                                                                                                                                                                                                                                                                                                                                                                                                                                                                                                                                                                                                                                                                                                                                                                                                                                                                                                                                                                                                                                                                                                                                                                                                                                                                                                                                                                                                                                                                                                                                                                                                                                                                                                                                                                                                                                                                                      | 70,505      |
| S3     | DE "Learning" OR DE "Active Learning" OR DE "Adult Learning" OR DE "Associative Learning" OR DE "Aural Learning" OR DE "Cooperative Learning" OR DE "Discovery Learning" OR DE "Discrimination Learning" OR DE "Electronic Learning" OR DE "Experiential Learning" OR DE "Incidental Learning" OR DE "Intentional Learning" OR DE "Interference (Learning)" OR DE "Lifelong Learning" OR DE "Mastery Learning" OR DE "Multisensory Learning" OR DE "Nonverbal Learning" OR DE "Observational Learning" OR DE "Prior Learning" OR DE "Problem Based Learning" OR DE "Rote Learning" OR DE "Second Language Learning" OR DE "Sequential Learning" OR DE "Serial Learning" OR DE "Student Centered Learning" OR DE "Symbolic Learning" OR DE "Transfer of Training" OR DE "Transformative Learning" OR DE "Verbal Learning" OR DE "Visual Learning" OR DE "Workplace Learning" OR DE "Active Learning" OR DE "Adult Learning" OR DE "Associative Learning" OR DE "Paired Associate Learning" OR DE "Aural Learning" OR DE "Cooperative Learning" OR DE "Discovery Learning" OR DE "Discrimination Learning" OR DE "Electronic Learning" OR DE "Experiential Learning" OR DE "Field Experience Programs" OR DE "Internship Programs" OR DE "Job Shadowing" OR DE "Service Learning" OR DE "Incidental Learning" OR DE "Intentional Learning" OR DE "Interference (Learning)" OR DE "Lifelong Learning" OR DE "Mastery Learning" OR DE "Multisensory Learning" OR DE "Nonverbal Learning" OR DE "Perceptual Motor Learning" OR DE "Observational Learning" OR DE "Prior Learning" OR DE "Problem Based Learning" OR DE "Rote Learning" OR DE "Second Language Learning" OR DE "Sequential Learning" OR DE "Serial Learning" OR DE "Student Centered Learning" OR DE "Symbolic Learning" OR DE "Transfer of Training" OR DE "Transformative Learning" OR DE "Verbal Learning" OR DE "Visual Learning" OR DE "Workplace Learning" OR TI (learning*) OR AB (learning*) | 381,995     |
| S2     | DE "Clinical Experience" OR TI (clinical* OR practice*) OR AB (clinical* OR practice*)                                                                                                                                                                                                                                                                                                                                                                                                                                                                                                                                                                                                                                                                                                                                                                                                                                                                                                                                                                                                                                                                                                                                                                                                                                                                                                                                                                                                                                                                                                                                                                                                                                                                                                                                                                                                                                                                         | 205,148     |

|           |                                                                                                                                                                                     |              |
|-----------|-------------------------------------------------------------------------------------------------------------------------------------------------------------------------------------|--------------|
| <b>S1</b> | DE "Nursing Students" OR TI ((nursing N3 student*) OR ((nursing OR nurse OR nurses) N3 internship*)) OR AB ((nursing N3 student*) OR ((nursing OR nurse OR nurses) N3 internship*)) | <b>2,294</b> |
|-----------|-------------------------------------------------------------------------------------------------------------------------------------------------------------------------------------|--------------|

## Ebsco/CINAHL (9 May 2018)

| Search     | Query                                                                                                                                                                                                                                                                | Items found    |
|------------|----------------------------------------------------------------------------------------------------------------------------------------------------------------------------------------------------------------------------------------------------------------------|----------------|
| <b>S11</b> | S1 AND S10                                                                                                                                                                                                                                                           | <b>3,209</b>   |
| <b>S10</b> | S5 OR S9                                                                                                                                                                                                                                                             | <b>14,430</b>  |
| <b>S9</b>  | S3 AND S8                                                                                                                                                                                                                                                            | <b>12,924</b>  |
| <b>S8</b>  | MH "Clinical Competence+" OR TI (clinical* OR practice*)                                                                                                                                                                                                             | <b>234,601</b> |
| <b>S7</b>  | S1 AND S6                                                                                                                                                                                                                                                            | <b>5,669</b>   |
| <b>S6</b>  | S4 OR S5                                                                                                                                                                                                                                                             | <b>32,948</b>  |
| <b>S5</b>  | MH "Learning Environment, Clinical" OR TI ("clinical learning*") OR AB ("clinical learning*")                                                                                                                                                                        | <b>2,388</b>   |
| <b>S4</b>  | S2 AND S3                                                                                                                                                                                                                                                            | <b>31,869</b>  |
| <b>S3</b>  | MH "Learning+" OR MH "Conditioning (Psychology)+" OR MH "Memory+" OR MH "Reinforcement (Psychology)+" OR MH "Problem Solving+" OR TI (learning*) OR AB (learning*)                                                                                                   | <b>103,547</b> |
| <b>S2</b>  | MH "Clinical Competence+" OR TI (clinical* OR practice*) OR AB (clinical* OR practice*)                                                                                                                                                                              | <b>631,184</b> |
| <b>S1</b>  | MH "Students, Nursing+" OR MH "Students, Nursing, Baccalaureate+" OR MH "Students, Nursing, Graduate+" OR TI ((nursing N3 student*) OR ((nursing OR nurse OR nurses) N3 internship*)) OR AB ((nursing N3 student*) OR ((nursing OR nurse OR nurses) N3 internship*)) | <b>35,637</b>  |

## 2. Search strategy and numbers of hits step 2

### 2.1 search strategy

**(PubMed:** *(concept\*[tiab] OR (conceptpart1\*[ti] AND conceptpart2\*[ti]) OR (conceptpart1 [ot] AND conceptpart2\*[ot]))* If integral concept could not be found in the Index, this was composed with an AND relation.

[Mesh] = Medical Subject Headings, keywords in PubMed

[tiab] = words in title or abstract

[ti] = words in title

[ot] = other terms, in particular author keywords

MH = mapped heading, keyword in CINAHL

DE = descriptor, keyword in ERIC

TI = words in title

AB = words in abstract

| Search | PubMed                                                                                                                                                                                                             | Ebsco/ERIC                                                                                                                                                                          | Ebsco/CINAHL                                                                                                                                                                                                                                                         |
|--------|--------------------------------------------------------------------------------------------------------------------------------------------------------------------------------------------------------------------|-------------------------------------------------------------------------------------------------------------------------------------------------------------------------------------|----------------------------------------------------------------------------------------------------------------------------------------------------------------------------------------------------------------------------------------------------------------------|
| #1     | "Students, Nursing"[Mesh] OR "Internship, Nonmedical"[Mesh:noexp] OR ((nursing[tiab] OR nurse[tiab] OR nurses[tiab]) AND student*[tiab]) OR ((nursing[tiab] OR nurse[tiab] OR nurses[tiab]) AND internship*[tiab]) | DE "Nursing Students" OR TI ((nursing N3 student*) OR ((nursing OR nurse OR nurses) N3 internship*)) OR AB ((nursing N3 student*) OR ((nursing OR nurse OR nurses) N3 internship*)) | MH "Students, Nursing+" OR MH "Students, Nursing, Baccalaureate+" OR MH "Students, Nursing, Graduate+" OR TI ((nursing N3 student*) OR ((nursing OR nurse OR nurses) N3 internship*)) OR AB ((nursing N3 student*) OR ((nursing OR nurse OR nurses) N3 internship*)) |
| #2     | authentic learning*[tiab] OR (authentic*[ti] AND learning*[ti]) OR (authentic*[ot] AND learning*[ot])                                                                                                              | TI (authentic* AND learning*) OR AB ("authentic learning*")                                                                                                                         | TI (authentic* AND learning*) OR AB ("authentic learning*")                                                                                                                                                                                                          |
| #3     | clinical learning*[tiab]                                                                                                                                                                                           | TI ("clinical learning*") OR AB ("clinical learning*")                                                                                                                              | TI (authentic* AND learning*) OR AB ("authentic learning*")                                                                                                                                                                                                          |
| #4     | clinical placement learning*[tiab] OR (clinical placement*[ti] AND learning*[ti]) OR (clinical placement*[ot] AND learning*[ot])                                                                                   | TI ("clinical placement"* AND learning*) OR AB ("clinical placement learning*")                                                                                                     | TI ("clinical placement"* AND learning*) OR AB ("clinical placement learning*")                                                                                                                                                                                      |
| #5     | (clinically based*[tiab] AND learning*[tiab])                                                                                                                                                                      | TI ("clinically based" AND learning*) OR AB ("clinically based learning*")                                                                                                          | TI ("clinically based" AND learning*) OR AB ("clinically based learning*")                                                                                                                                                                                           |
| #6     | (experiential learning*[tiab] OR (experiential*[ti] AND learning*[ti]) OR (experiential*[ot] AND learning*[ot]))                                                                                                   | DE "experiential learning" OR TI (experiential* AND learning*) OR AB ("experiential learning*")                                                                                     | MH "Experiential learning" OR TI (experiential* AND learning*) OR AB ("experiential learning*")                                                                                                                                                                      |
| #7     | experimental learning*[tiab] OR (experimental*[ti] AND learning*[ti]) OR (experimental*[ot] AND learning*[ot])                                                                                                     | TI (experimental* AND learning*) OR AB ("experimental learning*")                                                                                                                   | TI (experimental* AND learning*) OR AB ("experimental learning*")                                                                                                                                                                                                    |
| #8     | hidden curriculum*[tiab] OR (hidden*[ti] AND curriculum*[ti]) OR (hidden*[ot] AND curriculum*[ot])                                                                                                                 | DE "hidden curriculum" OR TI (hidden* AND curriculum*) OR AB ("hidden curriculum*")                                                                                                 | TI (hidden* AND curriculum*) OR AB ("hidden curriculum*")                                                                                                                                                                                                            |
| #9     | informal learning*[tiab] OR (informal*[ti] AND learning*[ti]) OR (informal*[ot] AND learning*[ot])                                                                                                                 | TI (informal* AND learning*) OR AB ("informal learning*")                                                                                                                           | TI (informal* AND learning*) OR AB ("informal learning*")                                                                                                                                                                                                            |
| #10    | learning by doing*[tiab] OR (learning*[ti] AND doing*[ti]) OR (learning*[ot] AND doing*[ot])                                                                                                                       | TI (learning* AND doing*) OR AB ("learning by doing*")                                                                                                                              | TI (learning* AND doing*) OR AB ("learning by doing*")                                                                                                                                                                                                               |

|     |                                                                                                                           |                                                                                                           |                                                                                                           |
|-----|---------------------------------------------------------------------------------------------------------------------------|-----------------------------------------------------------------------------------------------------------|-----------------------------------------------------------------------------------------------------------|
| #11 | "learning from experience*" [tiab]                                                                                        | TI "learning w1 experience*" OR AB "learning w1 experience"                                               | TI "learning w1 experience*" OR AB "learning w1 experience"                                               |
| #12 | "learning through experience*" [tiab]                                                                                     | TI ("learning through experience*" OR AB ("learning through experience*"))                                | TI ("learning through experience*" OR AB ("learning through experience*"))                                |
| #13 | (learning* [tiab] AND clinical placement experience* [tiab])                                                              | TI (learning* AND "clinical placement experience") OR AB ("learning from clinical placement experience*") | TI (learning* AND "clinical placement experience") OR AB ("learning from clinical placement experience*") |
| #14 | practice based learning* [tiab] OR (practice based* [ti] AND learning* [ti]) OR (practice based* [ot] AND learning* [ot]) | TI ("practice based*" AND learning*) OR AB ("practice based learning*")                                   | TI ("practice based*" AND learning*) OR AB ("practice based learning*")                                   |
| #15 | practice learning* [tiab]                                                                                                 | TI ("practice learning*") OR AB ("practice learning*")                                                    | TI ("practice learning*") OR AB ("practice learning*")                                                    |
| #16 | learning from practice* [tiab]                                                                                            | TI (learning w1 practice*) OR AB (learning w1 practice*)                                                  | TI (learning w1 practice*) OR AB (learning w1 practice*)                                                  |
| #17 | learning in practice* [tiab]                                                                                              | TI (learning w1 practice*) OR AB (learning w1 practice*)                                                  | TI (learning w1 practice*) OR AB (learning w1 practice*)                                                  |
| #18 | (learning* [tiab] AND clinical practicum* [tiab])                                                                         | TI (learning* AND "clinical practicum*") OR AB (learning w2 clinical practicum*)                          | TI (learning* AND "clinical practicum*") OR AB (learning w2 clinical practicum*)                          |
| #19 | (learning* [tiab] AND clinical field* [tiab])                                                                             | TI (learning* AND "clinical field*") OR AB (learning w2 clinical field*)                                  | TI (learning* AND "clinical field*") OR AB (learning w2 clinical field*)                                  |
| #20 | (learning* [tiab] AND clinical context* [tiab])                                                                           | TI (learning* AND "clinical context*") OR AB (learning w2 clinical context*)                              | TI (learning* AND "clinical context*") OR AB (learning w2 clinical context*)                              |
| #21 | (learning* [tiab] AND clinical setting* [tiab])                                                                           | TI (learning* AND "clinical setting*") OR AB (learning w2 clinical setting*)                              | TI (learning* AND "clinical setting*") OR AB (learning w2 clinical setting*)                              |
| #22 | (learning* [tiab] AND clinical nursing environment* [tiab])                                                               | TI (learning* AND "clinical nursing environment*") OR AB (learning w2 clinical nursing environment*)      | TI (learning* AND "clinical nursing environment*") OR AB (learning w2 clinical nursing environment*)      |
| #23 | (learning* [tiab] AND clinical environment* [tiab])                                                                       | TI (learning* AND "clinical environment*") OR AB (learning w2 clinical environment*)                      | TI (learning* AND "clinical environment*") OR AB (learning w2 clinical environment*)                      |
| #24 | learning on the job* [tiab] OR (learning* [ti] AND on the job* [ti]) OR (learning* [ot] AND on the job* [ot])             | TI (learning* AND "on the job*") OR AB ("learning on the job*")                                           | TI (learning* AND "on the job*") OR AB ("learning on the job*")                                           |
| #25 | workplace learning* [tiab] OR (workplace* [ti] AND learning* [ti]) OR (workplace* [ot] AND learning* [ot])                | DE "workplace learning" OR TI (workplace* AND learning*) OR AB ("workplace learning*")                    | TI (workplace* AND learning*) OR AB ("workplace learning*")                                               |

|     |                                                                                                                                                            |                                                                                      |                                                                                                      |
|-----|------------------------------------------------------------------------------------------------------------------------------------------------------------|--------------------------------------------------------------------------------------|------------------------------------------------------------------------------------------------------|
| #26 | learning in the workplace*[tiab] OR (learning*[ti] AND workplace*[ti]) OR (learning*[ot] AND workplace*[ot])                                               | TI (learning* AND "in the workplace*") OR AB ("learning in the workplace*")          | TI (learning* AND "in the workplace*") OR AB ("learning in the workplace*")                          |
| #27 | work based learning*[tiab] OR (work based*[ti] AND learning*[ti]) OR (work based*[ot] AND learning*[ot])                                                   | TI ("work based*" AND learning*) OR AB ("work based learning*")                      | TI ("work based*" AND learning*) OR AB ("work based learning*")                                      |
| #28 | work integrated learning*[tiab] OR (work integrated*[ti] AND learning*[ti]) OR (work integrated*[ot] AND learning*[ot])                                    | TI ("work integrated*" AND learning*) OR AB ("work integrated learning*")            | TI ("work integrated*" AND learning*) OR AB ("work integrated learning*")                            |
| #29 | learning process*[tiab]                                                                                                                                    | DE "Learning Processes" OR TI ("learning process*") OR AB ("learning process*")      | TI ("learning process*") OR AB ("learning process*")                                                 |
| #30 | "learning the practice of nursing"[tiab]                                                                                                                   | TI ("learning the practice of nursing*") OR AB ("learning the practice of nursing*") | TI ("learning the practice of nursing*") OR AB ("learning the practice of nursing*")                 |
| #31 | (learning*[tiab] AND clinical nursing*[tiab])                                                                                                              | TI (learning* AND "clinical nursing*") OR AB ("learning clinical nursing*")          | TI (learning* AND "clinical nursing*") OR AB ("learning clinical nursing*")                          |
| #32 | placement learning*[tiab] OR (placement*[ti] AND learning*[ti]) OR (placement*[ot] AND learning*[ot])                                                      | TI (placement* AND learning*) OR AB ("placement learning*")                          | TI (placement* AND learning*) OR AB ("placement learning*")                                          |
| #33 | "Self-Directed Learning as Topic"[Mesh] OR self directed learning*[tiab] OR (self directed[ti] AND learning*[ti]) OR (self directed[ot] AND learning*[ot]) | TI ("self directed*" AND learning*) OR AB ("self directed learning*")                | MH "Self directed learning" OR TI ("self directed*" AND learning*) OR AB ("self directed learning*") |
| #34 | self regulated learning*[tiab] OR (self regulated [ti] AND learning*[ti]) OR (self regulated [ot] AND learning*[ot])                                       | TI ("self regulated*" AND learning*) OR AB ("self regulated learning*")              | TI ("self regulated*" AND learning*) OR AB ("self regulated learning*")                              |
| #35 | situated learning*[tiab] OR (situated*[ti] AND learning*[ti]) OR (situated*[ot] AND learning*[ot])                                                         | TI (situated* AND learning*) OR AB ("situated learning*")                            | TI (situated* AND learning*) OR AB ("situated learning*")                                            |
| #36 | socialisation*[tiab]                                                                                                                                       | TI (socialisation*) OR AB ("socialisation*")                                         | TI (socialisation*) OR AB ("socialisation*")                                                         |
| #37 | socialization*[tiab]                                                                                                                                       | TI (socialization*) OR AB ("socialization*")                                         | TI (socialization*) OR AB ("socialization*")                                                         |
| #38 | student learning*[tiab]                                                                                                                                    | TI ("student learning*") OR AB ("student learning*")                                 | TI ("student learning*") OR AB ("student learning*")                                                 |
| #39 | ward based learning*[tiab] OR (ward based*[ti] AND learning*[ti]) OR (ward based*[ot] AND learning*[ot])                                                   | TI ("ward based" AND learning*) OR AB ("ward based learning*")                       | TI ("ward based" AND learning*) OR AB ("ward based learning*")                                       |



|  |                               |  |  |
|--|-------------------------------|--|--|
|  | based*[ot] AND learning*[ot]) |  |  |
|--|-------------------------------|--|--|

During the search and selection process, three concepts appeared in the literature that had been discarded before, but were added to the list of concepts to run the second search with after discussion in the research team. The total number of hits was calculated after this search.

| Concept | PubMed                                                                                                                 | Ebsco/ERIC                                                                  | Ebsco/CINAHL                                                                |
|---------|------------------------------------------------------------------------------------------------------------------------|-----------------------------------------------------------------------------|-----------------------------------------------------------------------------|
| #40     | (peer learning*[tiab]) OR (peer*[ti] AND learning*[ti]) OR (peer*[ot] AND learning*[ot])                               | TI ("peer*" AND learning*) OR AB ("peer learning*")                         | TI ("peer*" AND learning*) OR AB ("peer learning*")                         |
| #41     | Peer assisted*[tiab] OR (peer assisted*[ti] AND learning*[ti]) OR (peer assisted*[ot] AND learning*[ot])               | TI ("peer assisted*" AND learning*) OR AB ("peer assisted based learning*") | TI ("peer assisted*" AND learning*) OR AB ("peer assisted based learning*") |
| #42     | (transformative learning*[tiab] OR (transformative*[ti] AND learning*[ti]) OR (transformative*[ot] AND learning*[ot])) | TI (transformative* AND learning*) OR AB ("transformative learning*")       | TI (transformative* AND learning*) OR AB ("transformative learning*")       |

## 2.2 Number of hits per concept

|     | Concepts                                                                                                                                                                                   | Combination of searches with # from queries in the above table | PubMed (23 May 2018) | Ebsco/-ERIC (23 May 2018) | Ebsco/-CINAHL (23 May 2018) |
|-----|--------------------------------------------------------------------------------------------------------------------------------------------------------------------------------------------|----------------------------------------------------------------|----------------------|---------------------------|-----------------------------|
| 1.  | <b>Authentic learning</b>                                                                                                                                                                  | #1 AND #2                                                      | 32                   | 6                         | 23                          |
| 2.  | <b>Clinical learning/ clinically based learning/ clinical placement learning</b>                                                                                                           | #1 AND (#3 OR #4 OR 5)                                         | 631                  | 16                        | 544                         |
| 3.  | <b>Experiential learning</b>                                                                                                                                                               | #1 AND #6                                                      | 294                  | 84                        | 571                         |
| 4.  | <b>Experimental learning</b>                                                                                                                                                               | #1 AND #7                                                      | 31                   | 2                         | 26                          |
| 5.  | <b>Hidden curriculum</b>                                                                                                                                                                   | #1 AND # 8                                                     | 26                   | 1                         | 18                          |
| 6.  | <b>Informal learning</b>                                                                                                                                                                   | #1 AND #9                                                      | 11                   | 7                         | 7                           |
| 7.  | <b>Learning by doing</b>                                                                                                                                                                   | #1 AND #10                                                     | 12                   | 3                         | 14                          |
| 8.  | <b>Learning clinical nursing/ learning the practice of nursing</b>                                                                                                                         | #1 AND (#30 OR #31)                                            | 205                  | 0                         | 31                          |
| 9.  | <b>Learning from/through experience/learning from clinical placement experience</b>                                                                                                        | #1 AND (#11 OR #12 OR 13)                                      | 48                   | 7                         | 4                           |
| 10. | <b>Learning in the clinical field/learning in the clinical context/ Learning in the clinical setting/Learning in the clinical nursing environment/learning in the clinical environment</b> | #1 AND (#19 OR #20 OR #21 OR #22 OR #23)                       | 785                  | 16                        | 240                         |
| 11. | <b>Learning on the job</b>                                                                                                                                                                 | #1 AND #24                                                     | 0                    | 2                         | 2                           |

|     |                                                                                                                                                                                              |                                          |      |    |     |
|-----|----------------------------------------------------------------------------------------------------------------------------------------------------------------------------------------------|------------------------------------------|------|----|-----|
| 12. | <b>Learning process</b>                                                                                                                                                                      | #1 AND #29                               | 463  | 40 | 474 |
| 13. | <b>Learning in practice/learning from practice/ learning in practice environment/learning in practice setting/learning in a clinical practicum/practice learning/practice based learning</b> | #1 AND (#14 OR #15 OR #16 OR #17 OR #18) | 176  | 10 | 205 |
| 14. | <b>Placement learning</b>                                                                                                                                                                    | #1 AND #32                               | 102  | 4  | 64  |
| 15. | <b>Practice based learning</b>                                                                                                                                                               |                                          |      |    |     |
| 16. | <b>Self directed learning</b>                                                                                                                                                                | #1 AND #33                               | 1210 | 20 | 297 |
| 17. | <b>Self-regulated learning</b>                                                                                                                                                               | #1 AND #34                               | 27   | 2  | 32  |
| 18. | <b>Situated learning</b>                                                                                                                                                                     | #1 AND #35                               | 25   | 4  | 17  |
| 19. | <b>Socialisation/socialisation</b>                                                                                                                                                           | #1 AND (#36 OR #37)                      | 380  | 35 | 372 |
| 20. | <b>Student learning</b>                                                                                                                                                                      | #1 AND #38                               | 543  | 66 | 663 |
| 21. | <b>Ward based learning</b>                                                                                                                                                                   | #1 AND #39                               | 0    | 1  | 2   |
| 22. | <b>Workplace learning/learning in the workplace/work based learning/work integrated learning</b>                                                                                             | #1 AND (#25 OR #26 OR #27 OR #28)        | 92   | 5  | 67  |
| 23. | <b>Peer learning*</b>                                                                                                                                                                        | #1 AND #40                               | 106  | 4  | 31  |
| 24. | <b>Peer assisted learning*</b>                                                                                                                                                               | #1 AND #41                               | 23   | 0  | 3   |
| 25. | <b>Transformative learning*</b>                                                                                                                                                              | #1 AND #42                               | 60   | 17 | 19  |

\* Search 23, 24 and 25 have been conducted on 16 september 2018.

Supplementary file 4. List of potentially eligible concepts and their reason for inclusion/exclusion in the second search step after discussion.

|                                          | Inclusion? | Rationale                                                                                                           |
|------------------------------------------|------------|---------------------------------------------------------------------------------------------------------------------|
| Active learning                          | no         | Used exclusively for learning in the classroom setting                                                              |
| Authentic learning                       | yes        | Is used as an equivalent to learning in clinical practice <sup>1</sup>                                              |
| Blended learning                         | No         | Used exclusively for learning in the classroom setting                                                              |
| case based learning                      | no         | Used exclusively for learning in the classroom setting, simulation learning or online learning                      |
| clinical experience/ practice experience | no         | Used to describe the overall experience of being in a clinical setting rather than the learning process             |
| clinical learning                        | yes        | Used as an equivalent to learning in clinical practice                                                              |
| clinical learning environment            | no         | Used to describe learning circumstances rather than the learning process itself                                     |
| clinical learning model                  | no         | Used to describe learning circumstances rather than the learning process itself                                     |
| Clinical nursing education               | no         | Is used to describe the entire system (organization, supervision, contents etc. ) within which learning takes place |
| clinical placement learning              | yes        | Used as an equivalent to learning in clinical practice                                                              |
| clinical skills learning                 | no         | Used to describe a specific part (ie skills learning) of learning in clinical practice                              |
| clinically based learning                | yes        | Used as an equivalent to learning in clinical practice                                                              |
| Collaborative learning                   | no         | Used to describe a specific way of organizing learning in clinical practice (ie learning in pairs)                  |
| concept-based learning                   | no         | Used either for curriculum design or for specific learning activities in clinical practice                          |
| cooperative learning                     | No         | Used to describing specific learning/ teaching activities                                                           |
| deep learning                            | no         | Used exclusively for learning in the classroom setting, simulation learning or online learning                      |
| Deliberate practice                      | No         | Used to describing specific learning/ teaching activities                                                           |
| Didactic learning                        | No         | Used exclusively for learning in the classroom setting                                                              |
| dual level learning                      | No         | Used to describe a specific way of organizing classroom learning                                                    |
| empathy learning                         | no         | Used to describe the learning of a specific skill (ie empathy)                                                      |
| Enquiry based learning                   | no         | Used to describing specific learning/ teaching activities                                                           |
| Experiential learning                    | yes        | Is as an equivalent to learning in clinical practice                                                                |
| Experimental learning                    | yes        | Is as an equivalent to learning in clinical practice                                                                |
| Hidden curriculum                        | yes        | Although this is not an equivalent to learning in practice, we decided to include this concept as it is used to     |

|                                                                                                                                                                                     |     |                                                                                                                                    |
|-------------------------------------------------------------------------------------------------------------------------------------------------------------------------------------|-----|------------------------------------------------------------------------------------------------------------------------------------|
|                                                                                                                                                                                     |     | describe a way in which knowledge and valued are transmitted in clinical practice outside specific teaching or learning activities |
| Informal learning                                                                                                                                                                   | yes | Is used as an equivalent to learning in clinical practice                                                                          |
| (Work) integrated learning                                                                                                                                                          | yes | Is (in some cases) <sup>2</sup> used as an equivalent to learning in practice                                                      |
| Integrative learning                                                                                                                                                                | No  | Used for describing specific teaching and learning strategies                                                                      |
| Intentional learning                                                                                                                                                                | no  | Used to describe specific learning/ teaching activities <sup>3</sup> or competencies <sup>4</sup>                                  |
| interprofessional learning                                                                                                                                                          | no  | Used to describe a specific way of organizing learning in clinical practice (ie learning with and from other disciplines)          |
| Learning by doing                                                                                                                                                                   | yes | Used as an equivalent to learning in clinical practice                                                                             |
| learning clinical nursing                                                                                                                                                           | yes | Used as an equivalent to learning in clinical practice                                                                             |
| learning from/through experience                                                                                                                                                    | yes | Used as an equivalent to learning in clinical practice                                                                             |
| learning from clinical placement experience                                                                                                                                         | yes | Used as an equivalent to learning in clinical practice                                                                             |
| learning from practice                                                                                                                                                              | yes | Used as an equivalent to learning in clinical practice                                                                             |
| learning in a clinical environment                                                                                                                                                  | yes | Used as an equivalent to learning in clinical practice                                                                             |
| learning in practice/ learning in practice environment/ learning in practice setting/learning in a clinical practicum                                                               | yes | Used as an equivalent to learning in clinical practice                                                                             |
| Learning in the clinical field/learning in the clinical context/ Learning in the clinical setting/Learning in the clinical nursing environment/learning in the clinical environment | yes | Used as an equivalent to learning in clinical practice                                                                             |
| learning in the practice setting                                                                                                                                                    | yes | Used as an equivalent to learning in clinical practice                                                                             |
| Learning on the job                                                                                                                                                                 | yes | Used as an equivalent to learning in clinical practice                                                                             |
| Learning on the workplace/ workplace learning/learning in the workplace                                                                                                             | yes | Used as an equivalent to learning in clinical practice                                                                             |
| learning process                                                                                                                                                                    | yes | Used as an equivalent to learning in clinical practice <sup>5</sup>                                                                |
| Learning situation                                                                                                                                                                  | no  | Used to describe learning circumstances rather than the learning process itself                                                    |
| learning the practice of nursing                                                                                                                                                    | yes | Used as an equivalent to learning in clinical practice <sup>6</sup>                                                                |
| learning through experience                                                                                                                                                         | yes | Used as an equivalent to learning in clinical practice                                                                             |
| learning trajectories                                                                                                                                                               | no  | Used to describe learning in a specific program <sup>7</sup>                                                                       |
| Meaningful learning                                                                                                                                                                 | no  | Used exclusively for learning in the classroom setting <sup>8</sup> or simulation learning <sup>9</sup>                            |
| Online learning                                                                                                                                                                     | no  | Used for specific learning activities outside the clinical                                                                         |

|                                                            |                  |                                                                                                                                                                                                 |
|------------------------------------------------------------|------------------|-------------------------------------------------------------------------------------------------------------------------------------------------------------------------------------------------|
|                                                            |                  | setting                                                                                                                                                                                         |
| Peer based learning/ peer learning/ peer assisted learning | yes <sup>1</sup> | Used to describe a specific central way learning in clinical practice                                                                                                                           |
| Perceptual learning                                        | no               | Used to describe a specific technique to learn in clinical practice                                                                                                                             |
| placement learning                                         | Yes              | Used as an equivalent to learning in clinical practice                                                                                                                                          |
| Practice learning                                          | Yes              | Used as an equivalent to learning in clinical practice                                                                                                                                          |
| Practice-based learning                                    | Yes              | Used as an equivalent to learning in clinical practice                                                                                                                                          |
| problem-based learning/ problem based learning             | no               | Used exclusively for learning in the classroom setting, simulation learning or online learning                                                                                                  |
| professional development                                   | No               | Used to describe the result of learning in the clinical setting, rather than the process                                                                                                        |
| Reflective learning                                        | No               | Used to describe specific teaching and learning strategies                                                                                                                                      |
| Self-directed learning                                     | yes              | Used (at least in some studies, eg <sup>10</sup> ) to describe a very important component of learning in the clinical setting, that is, the part that takes place at the learner's initiative). |
| Self-regulated learning                                    | yes              | Used (at least in some studies, eg <sup>11</sup> ) to describe a major part of learning in the clinical setting, that is, the part that takes place at the learner's initiative).               |
| Service learning                                           | no               | Used for the particular combination of providing (voluntary) community service and learning in practice                                                                                         |
| Shared learning                                            | No               | Used to describe a specific way of organizing learning in clinical practice (ie learning from and with others)                                                                                  |
| Situated learning                                          | yes              | Used as an equivalent to learning in clinical practice, <sup>12</sup>                                                                                                                           |
| socialisation/ socialization                               | yes              | Used to describe a major part of learning in clinical practice                                                                                                                                  |
| student learning                                           | yes              | Is, in some cases (eg <sup>13</sup> ) used to describe learning in clinical practice)                                                                                                           |
| task-based learning                                        | No               | Used to describe a specific way of organizing learning in clinical practice (ie around tasks <sup>14</sup> )                                                                                    |
| team-based learning                                        | No               | Used exclusively for learning in the classroom setting                                                                                                                                          |
| Transformational learning                                  | No               | Used to describe the result of learning in the clinical setting, rather than the process <sup>15</sup>                                                                                          |
| Transformative learning                                    | yes <sup>2</sup> | Used to describe both process and outcomes of learning <sup>16</sup>                                                                                                                            |
| Ward based learning                                        | Yes              | Used as an equivalent to learning in clinical practice                                                                                                                                          |
| Work-based learning                                        | Yes              | Used as an equivalent to learning in clinical practice                                                                                                                                          |
| work-integrated learning                                   | Yes              | Used as an equivalent to learning in clinical practice                                                                                                                                          |

<sup>1</sup> Excluded in first instance as it appeared to be used to study interventions or specific organizational models. On the basis of results in search step 2, the concept was included in second instance.

<sup>2</sup> Excluded in first instance as it appeared to be used to study classroom learning only. On the basis of results in search step 2, the concept was included in second instance.

1  
2  
3  
4  
5  
6  
7  
8  
9  
10  
11  
12  
13  
14  
15  
16  
17  
18  
19  
20  
21  
22  
23  
24  
25  
26  
27  
28  
29  
30  
31  
32  
33  
34  
35  
36  
37  
38  
39  
40  
41  
42  
43  
44  
45  
46  
47  
48  
49  
50  
51  
52  
53  
54  
55  
56  
57  
58  
59  
60

|                    |     |                                                        |
|--------------------|-----|--------------------------------------------------------|
| workplace learning | Yes | Used as an equivalent to learning in clinical practice |
|--------------------|-----|--------------------------------------------------------|

For peer review only

**Supplementary file 5. Excluded full text articles and main reason for exclusion**

|     |                                                                                                                                                              |
|-----|--------------------------------------------------------------------------------------------------------------------------------------------------------------|
| 1.  | Not been able to retrieve full text of this study                                                                                                            |
| 2.  | Study is about influencing factors, interventions, organizational models, personal characteristics affecting learning instead of the learning process itself |
| 3.  | Study is not about learning/ not possible to separate findings about learning from other findings                                                            |
| 4.  | No original study or review                                                                                                                                  |
| 5.  | Study is incomplete (eg no results)                                                                                                                          |
| 6.  | Study is about a research methodology                                                                                                                        |
| 7.  | Another study within the same project is already included, this study offers no additional findings                                                          |
| 8.  | Study is too specific                                                                                                                                        |
| 9.  | Study is not about clinical practice/ not possible to separate findings about clinical practice from other findings                                          |
| 10. | Study is not about nursing students/not about hospital setting                                                                                               |

|                                                        | 1 | 2 | 3 | 4 | 5 | 6 | 7 | 8 | 9 | 10 |
|--------------------------------------------------------|---|---|---|---|---|---|---|---|---|----|
| Abe (1977)                                             | x |   |   |   |   |   |   |   |   |    |
| Allan, Smith, and O'Driscoll (2011)                    |   | x |   |   |   |   |   |   |   |    |
| Alves and Cogo (2014)                                  |   |   | x |   |   |   |   |   |   |    |
| Andrade Bezerra, Soares Campos, and Da Silveira (2005) | x |   |   |   |   |   |   |   |   |    |
| Arlton and Miercort (1980)                             |   |   |   | x |   |   |   |   |   |    |
| Arrigoni et al. (2017)                                 |   |   |   | x |   |   |   |   |   |    |
| Baldwin, Mills, Birks, and Budden (2014)               |   | x |   |   |   |   |   |   |   |    |
| Barry, Ward, and Walter (2017)                         |   |   |   |   |   | x |   |   |   |    |
| Brackenreg (2004)                                      |   | x |   |   |   |   |   |   |   |    |
| Burnard (1991)                                         |   |   |   | x |   |   |   |   |   |    |
| Burnard (1992)                                         |   |   |   |   |   |   | x |   |   |    |
| Charneia (2007)                                        | x |   |   |   |   |   |   |   |   |    |
| Coetzee (2004)                                         |   |   |   |   |   |   |   | x |   |    |
| Cope, Cuthbertson, and Stoddart (2000)                 |   | x |   |   |   |   |   |   |   |    |
| Corbett (1973)                                         |   | x |   |   |   |   |   |   |   |    |
| Cowman (1998)                                          |   | x |   |   |   |   |   |   |   |    |
| Crouch (1991)                                          | x |   |   |   |   |   |   |   |   |    |
| Cullingford (1991)                                     | x |   |   |   |   |   |   |   |   |    |
| de Jesus, Sena, and Andrade (2014)                     |   |   |   |   |   |   |   |   | x |    |
| de Jesus et al. (2014)                                 |   | x |   |   |   |   |   |   |   |    |
| Durgante Alves and Petersen Cogo (2015)                |   |   | x |   |   |   |   |   |   |    |
| Edwards (2013)                                         |   |   |   |   |   | x |   |   |   |    |
| Egginton (2002)                                        | x |   |   |   |   |   |   |   |   |    |
| Endacott, Scholes, Freeman, and Cooper (2003)          |   | x |   |   |   |   |   |   |   |    |
| Evans (1987)                                           |   |   |   | x |   |   |   |   |   |    |
| Friedman (1981)                                        | x |   |   |   |   |   |   |   |   |    |
| Green and Holloway (1997)                              |   |   |   |   |   | x |   |   |   |    |
| Hauge (1999)                                           | x |   |   |   |   |   |   |   |   |    |
| Hauge (1999)                                           | x |   |   |   |   |   |   |   |   |    |
| Henderson et al. (2018)                                |   | x |   |   |   |   |   |   |   |    |
| Henderson et al. (2018)                                | x |   |   |   |   |   |   |   |   |    |
| Hill (2016)                                            |   |   | x |   |   |   |   |   |   |    |
| Hold, Blake, and Ward (2015)                           |   |   |   |   |   |   |   |   | x |    |
| Holmsen (2010)                                         |   | x |   |   |   |   |   |   |   |    |
| Ironside, McNelis, and Ebright (2014)                  |   |   | x |   |   |   |   |   |   |    |





- 1  
2  
3 Barry, S., Ward, L., & Walter, R. (2017). Exploring Nursing Students' Experiences of Learning Using  
4 Phenomenography: A Literature Review. *J Nurs Educ*, 56(10), 591-598.  
5 doi:10.3928/01484834-20170918-03  
6  
7 Brackenreg, J. (2004). Issues in reflection and debriefing: how nurse educators structure experiential  
8 activities. *Nurse Educ Pract*, 4(4), 264-270. doi:10.1016/j.nepr.2004.01.005  
9  
10 Burnard, P. (1991). Perceptions of experiential learning. *Nurs Times*, 87(8), 47.  
11  
12 Burnard, P. (1992). Defining experiential learning: nurse tutors' perceptions. *Nurse Educ Today*, 12(1),  
13 29-36.  
14  
15 Charneia, E. (2007). Nursing students' perceptions of role modeling as it relates to learning in the  
16 clinical environment. *Ph.D.*, 307 p-307 p.  
17  
18 Coetzee, M. (2004). Learning to nurse children: towards a model for nursing students. *J Adv Nurs*,  
19 47(6), 639-648. doi:10.1111/j.1365-2648.2004.03152.x  
20  
21 Cope, P., Cuthbertson, P., & Stoddart, B. (2000). Situated learning in the practice placement. *J Adv  
22 Nurs*, 31(4), 850-856.  
23  
24 Corbett, D. (1973). Student nurses share in clinical learning. *Can Nurse*, 69(11), 21.  
25  
26 Cowman, S. (1998). The approaches to learning of student nurses in the Republic of Ireland and  
27 Northern Ireland. *J Adv Nurs*, 28(4), 899-910.  
28  
29 Crouch, S. (1991). The value of clinical learning. *Nursing (Lond)*, 4(32), 9-11.  
30  
31 Cullingford, S. (1991). Learning from experience. *Senior Nurse*, 11(6), 25-28.  
32  
33 de Jesus, I. S., Sena, E. L., & Andrade, L. M. (2014). Learning in the informal spaces and re-signification  
34 of the existence of undergraduate students of nursing. *Rev Lat Am Enfermagem*, 22(5), 731-  
35 738.  
36  
37 Durgante Alves, E. A. T., & Petersen Cogo, A. L. (2015). NURSING STUDENTS' PERCEPTION OF THE  
38 LEARNING PROCESS IN A HOSPITAL SETTING. *Rev Gaucha Enferm*, 36(1), 102-109.  
39 doi:10.1590/1983-1447.2014.01.42870  
40  
41 Edwards, S. L. (2013). Learning from Practice: the Value of Story in Nurse Education. *Ph.D.*, N.PAG p-  
42 N.PAG p.  
43  
44 Egginton, D. (2002). Learning from experience: a first-year student reflects. *Paediatr Nurs*, 14(10), 30-  
45 31.  
46  
47 Endacott, R., Scholes, J., Freeman, M., & Cooper, S. (2003). The reality of clinical learning in critical  
48 care settings: a practitioner:student gap? *J Clin Nurs*, 12(5), 778-785.  
49  
50 Evans, N. (1987). Quest: Learning from experience. *Nurs Times*, 83(42), 49-50.  
51  
52 Friedman, F. B. (1981). Learning by doing. *J Pract Nurs*, 31(6), 20-23.  
53  
54 Green, A. J., & Holloway, D. G. (1997). Using a phenomenological research technique to examine  
55 student nurses' understandings of experiential teaching and learning: a critical review of  
56 methodological issues. *J Adv Nurs*, 26(5), 1013-1019.  
57  
58 Hauge, K. W. (1999). To perceive and to be perceived. *Nordic Journal of Nursing Research & Clinical  
59 Studies / Vård i Norden*, 19(2), 37-41.  
60  
61 Henderson, A., Harrison, P., Rowe, J., Edwards, S., Barnes, M., Henderson, S., & Henderson, A. (2018).  
62 Students take the lead for learning in practice: A process for building self-efficacy into  
63 undergraduate nursing education. *Nurse Educ Pract*, 31, 14-19.  
64 doi:10.1016/j.nepr.2018.04.003  
65  
66 Hill, L. A. (2016). Telling their stories: Using Appreciative Inquiry to explore the lived experience of  
67 students in clinical nursing education. *Telling Their Stories: Using Appreciative Inquiry to  
68 Explore the Lived Experience of Students in Clinical Nursing Education*, 1-1.  
69  
70 Hold, J. L., Blake, B. J., & Ward, E. N. (2015). Perceptions and experiences of nursing students enrolled  
71 in a palliative and end-of-life nursing elective: A qualitative study. *Nurse Educ Today*, 35(6),  
72 777-781. doi:10.1016/j.nedt.2015.02.011  
73  
74 Holmsen, T. L. (2010). Influences on nursing students' confidence and learning in clinical practice.  
75 *Nordic Journal of Nursing Research & Clinical Studies / Vård i Norden*, 30(1), 24-28.  
76  
77 Ironside, P. M., McNelis, A. M., & Ebright, P. (2014). Clinical education in nursing: rethinking learning  
78 in practice settings. *Nurs Outlook*, 62(3), 185-191. doi:10.1016/j.outlook.2013.12.004

- 1  
2  
3 Kosowski, M. M. (1995). Clinical learning experiences and professional nurse caring: a critical  
4 phenomenological study of female baccalaureate nursing students. *J Nurs Educ*, 34(5), 235-  
5 242.
- 6 Kuiper, R. A. (2004). Nursing reflections from journaling during a perioperative internship. *Aorn j*,  
7 79(1), 195-198, 201-196, 209-112 passim.
- 8 Levett-Jones, T. L. (2007). Facilitating reflective practice and self-assessment of competence through  
9 the use of narratives. *Nurse Educ Pract*, 7(2), 112-119. doi:10.1016/j.nepr.2006.10.002
- 10 Love, C. (1996). Using a diary to learn the patient's perspective. *Prof Nurse*, 11(5), 286-288.
- 11 MacFarlane, E., & Hart, J. D. (1995). Self-directed learning experiences for senior BScN students. *Can*  
12 *Nurse*, 91(10), 17.
- 13 May, N., & Veitch, L. (1998). Working to learn and learning to work: placement experience of Project  
14 2000 nursing students in Scotland. *Nurse Educ Today*, 18(8), 630-636.
- 15 Montagna, L., Benaglio, C., & Zannini, L. (2010). [Reflective writing in nursing education: background,  
16 experiences and methods]. *Assist Inferm Ric*, 29(3), 140-152.
- 17 More, P., & Conklin, J. (1995). Investigating student learning: the Katz-Henry model. *J Nurs Educ*,  
18 34(3), 143-144.
- 19 Newton, J. M., Billett, S., & Ockerby, C. M. (2009). Journeying through clinical placements--an  
20 examination of six student cases. *Nurse Educ Today*, 29(6), 630-634.  
21 doi:10.1016/j.nedt.2009.01.009
- 22 Nolan, C. A. (1998). Learning on clinical placement: the experience of six Australian student nurses.  
23 *Nurse Educ Today*, 18(8), 622-629.
- 24 O'Shea, E. (2003). Self-directed learning in nurse education: a review of the literature. *J Adv Nurs*,  
25 43(1), 62-70.
- 26 Paliadelis, P., & Wood, P. (2016). Learning from clinical placement experience: Analysing nursing  
27 students' final reflections in a digital storytelling activity. *Nurse Educ Pract*, 20, 39-44.  
28 doi:10.1016/j.nepr.2016.06.005
- 29 Papp, I., Markkanen, M., & Von Bonsdorff, M. (2001). Student, teacher, mentor -- student nurses  
30 learning experiences in clinical practice. *Sairaanhoitaja*, 74(8), 26-29.
- 31 Polifroni, E. C., Packard, S. A., Shah, H. S., & MacAvoy, S. (1995). Activities and interactions of  
32 baccalaureate nursing students in clinical practica. *J Prof Nurs*, 11(3), 161-169.
- 33 Rajeswaran, L. (2016). Clinical Experiences of Nursing Students at a Selected Institute of Health  
34 Sciences in Botswana. *Health Science Journal*, 10(6), 1-6. doi:10.21767/1791-809X.1000471
- 35 Reutter, L., Field, P. A., Campbell, I. E., & Day, R. (1997). Socialization into nursing: nursing students  
36 as learners. *J Nurs Educ*, 36(4), 149-155.
- 37 Rodríguez García, M., Ruiz López, M., González Sanz, P., Fernández Trinidad, M., & De Blas Gómez, I.  
38 (2014). Life experiences of the student nursing 4th in the practicum. *Cultura de los Cuidados*,  
39 18(38), 25-33.
- 40 Sandvik, A.-H., Melender, H.-L., Jonsén, E., Jönsson, G., Salmu, M., & Hilli, Y. (2012). Nursing  
41 students'experiences of the first clinical education-a nordic quantitative study. *Nordic Journal*  
42 *of Nursing Research & Clinical Studies / Vård i Norden*, 32(3), 20-25.
- 43 Shahsavari, H., Zare, Z., Parsa-Yekta, Z., Griffiths, P., & Vaismoradi, M. (2018). Learning Situations in  
44 Nursing Education: A Concept Analysis. *Res Theory Nurs Pract*, 32(1), 23-45.  
45 doi:10.1891/0000-000y.32.1.23
- 46 Shin, K. R. (2000). The meaning of the clinical learning experience in Korean nursing students. *Journal*  
47 *of Nursing Education*, 39(6), 259-265.
- 48 Shirazi, F., Sharif, F., Molazem, Z., & Alborzi, M. (2017). Dynamics of self-directed learning in M.Sc.  
49 nursing students: A qualitative research. *J Adv Med Educ Prof*, 5(1), 33-41.
- 50 Skaalvik, M. W., Normann, H. K., & Henriksen, N. (2010). To what extent does the oral shift report  
51 stimulate learning among nursing students? A qualitative study\*. *J Clin Nurs*, 19(15-16),  
52 2300-2308. doi:10.1111/j.1365-2702.2010.03217.x
- 53 Smith, P., & Morrison, J. (2006). Clinical clerkships: students can structure their own learning. *Med*  
54 *Educ*, 40(9), 884-892. doi:10.1111/j.1365-2929.2006.02546.x
- 55  
56  
57  
58  
59  
60

- 1  
2  
3 Spouse, J. (2001). Workplace learning: pre-registration nursing students' perspectives. *Nurse Educ Pract*, 1(3), 149-156. doi:10.1054/nepr.2001.0024  
4  
5 Tagliareni, E. (1991). What and how of student learning activities. *NLN Publ*(15-2411), 65-91.  
6  
7 Thrysoe, L., Hounsgaard, L., Dohn, N. B., & Wagner, L. (2010). Participating in a community of  
8 practice as a prerequisite for becoming a nurse - Trajectories as final year nursing students.  
9 *Nurse Educ Pract*, 10(6), 361-366. doi:10.1016/j.nepr.2010.05.004  
10  
11 Tupala, M., Tossavainen, K., & Turunen, H. (2004). PHN students' target levels of competencies in  
12 children and adolescents' nursing. *Hoitotiede*, 16(3), [98]-110.  
13  
14 Vesanto, A., & Munnukka, T. (1996). Work as student primary nurse in promoting professional skills  
15 of student nurses. *Hoitotiede*, 8(1), 20-28.  
16  
17 Wilson, M. E. (1994). Nursing student perspective of learning in a clinical setting. *J Nurs Educ*, 33(2),  
18 81-86.  
19  
20 Wong, F. K. Y., & Lee, W. M. (2000). A phenomenological study of early nursing experiences in Hong  
21 Kong. *J Adv Nurs*, 31(6), 1509-1517. doi:10.1046/j.1365-2648.2000.01433.x  
22  
23 Zhao, Y., Kuan, H. K., Chung, J. O. K., Chan, C. K. Y., & Li, W. H. C. (2018). Students' approaches to  
24 learning in a clinical practicum: A psychometric evaluation based on item response theory.  
25 *Nurse Educ Today*, 66, 179-186. doi:10.1016/j.nedt.2018.04.015  
26  
27  
28  
29  
30  
31  
32  
33  
34  
35  
36  
37  
38  
39  
40  
41  
42  
43  
44  
45  
46  
47  
48  
49  
50  
51  
52  
53  
54  
55  
56  
57  
58  
59  
60
