# Supplementary material for: How do undergraduate nursing students learn in the hospital setting? A scoping review of conceptualisations, operationalisations and learning activities
Source: PubMed Central journal article supplement — BMJ Open. 2019 Dec 8;9(12):e029397. doi: 10.1136/bmjopen-2019-029397 (PMC6924761; doi:10.1136/bmjopen-2019-029397), 2019-12-08
Supplement: bmjopen-2019-029397supp004.pdf [file bmjopen-2019-029397supp004.pdf]

Supplementary file 4. List of potentially eligible concepts and their reason for inclusion/exclusion in the second search step after discussion.

|                                          | Inclusion? | Rationale                                                                                                           |
|------------------------------------------|------------|---------------------------------------------------------------------------------------------------------------------|
| Active learning                          | no         | Used exclusively for learning in the classroom setting                                                              |
| Authentic learning                       | yes        | Is used as an equivalent to learning in clinical practice <sup>1</sup>                                              |
| Blended learning                         | No         | Used exclusively for learning in the classroom setting                                                              |
| case based learning                      | no         | Used exclusively for learning in the classroom setting, simulation learning or online learning                      |
| clinical experience/ practice experience | no         | Used to describe the overall experience of being in a clinical setting rather than the learning process             |
| clinical learning                        | yes        | Used as an equivalent to learning in clinical practice                                                              |
| clinical learning environment            | no         | Used to describe learning circumstances rather than the learning process itself                                     |
| clinical learning model                  | no         | Used to describe learning circumstances rather than the learning process itself                                     |
| Clinical nursing education               | no         | Is used to describe the entire system (organization, supervision, contents etc. ) within which learning takes place |
| clinical placement learning              | yes        | Used as an equivalent to learning in clinical practice                                                              |
| clinical skills learning                 | no         | Used to describe a specific part (ie skills learning) of learning in clinical practice                              |
| clinically based learning                | yes        | Used as an equivalent to learning in clinical practice                                                              |
| Collaborative learning                   | no         | Used to describe a specific way of organizing learning in clinical practice (ie learning in pairs)                  |
| concept-based learning                   | no         | Used either for curriculum design or for specific learning activities in clinical practice                          |
| cooperative learning                     | No         | Used to describing specific learning/ teaching activities                                                           |
| deep learning                            | no         | Used exclusively for learning in the classroom setting, simulation learning or online learning                      |
| Deliberate practice                      | No         | Used to describing specific learning/ teaching activities                                                           |
| Didactic learning                        | No         | Used exclusively for learning in the classroom setting                                                              |
| dual level learning                      | No         | Used to describe a specific way of organizing classroom learning                                                    |
| empathy learning                         | no         | Used to describe the learning of a specific skill (ie empathy)                                                      |
| Enquiry based learning                   | no         | Used to describing specific learning/ teaching activities                                                           |
| Experiential learning                    | yes        | Is as an equivalent to learning in clinical practice                                                                |
| Experimental learning                    | yes        | Is as an equivalent to learning in clinical practice                                                                |
| Hidden curriculum                        | yes        | Although this is not an equivalent to learning in practice, we decided to include this concept as it is used to     |

|                                                                                                                                                                                     |     |                                                                                                                                    |
|-------------------------------------------------------------------------------------------------------------------------------------------------------------------------------------|-----|------------------------------------------------------------------------------------------------------------------------------------|
|                                                                                                                                                                                     |     | describe a way in which knowledge and valued are transmitted in clinical practice outside specific teaching or learning activities |
| Informal learning                                                                                                                                                                   | yes | Is used as an equivalent to learning in clinical practice                                                                          |
| (Work) integrated learning                                                                                                                                                          | yes | Is (in some cases) <sup>2</sup> used as an equivalent to learning in practice                                                      |
| Integrative learning                                                                                                                                                                | No  | Used for describing specific teaching and learning strategies                                                                      |
| Intentional learning                                                                                                                                                                | no  | Used to describe specific learning/ teaching activities <sup>3</sup> or competencies <sup>4</sup>                                  |
| interprofessional learning                                                                                                                                                          | no  | Used to describe a specific way of organizing learning in clinical practice (ie learning with and from other disciplines)          |
| Learning by doing                                                                                                                                                                   | yes | Used as an equivalent to learning in clinical practice                                                                             |
| learning clinical nursing                                                                                                                                                           | yes | Used as an equivalent to learning in clinical practice                                                                             |
| learning from/through experience                                                                                                                                                    | yes | Used as an equivalent to learning in clinical practice                                                                             |
| learning from clinical placement experience                                                                                                                                         | yes | Used as an equivalent to learning in clinical practice                                                                             |
| learning from practice                                                                                                                                                              | yes | Used as an equivalent to learning in clinical practice                                                                             |
| learning in a clinical environment                                                                                                                                                  | yes | Used as an equivalent to learning in clinical practice                                                                             |
| learning in practice/ learning in practice environment/ learning in practice setting/learning in a clinical practicum                                                               | yes | Used as an equivalent to learning in clinical practice                                                                             |
| Learning in the clinical field/learning in the clinical context/ Learning in the clinical setting/Learning in the clinical nursing environment/learning in the clinical environment | yes | Used as an equivalent to learning in clinical practice                                                                             |
| learning in the practice setting                                                                                                                                                    | yes | Used as an equivalent to learning in clinical practice                                                                             |
| Learning on the job                                                                                                                                                                 | yes | Used as an equivalent to learning in clinical practice                                                                             |
| Learning on the workplace/ workplace learning/learning in the workplace                                                                                                             | yes | Used as an equivalent to learning in clinical practice                                                                             |
| learning process                                                                                                                                                                    | yes | Used as an equivalent to learning in clinical practice <sup>5</sup>                                                                |
| Learning situation                                                                                                                                                                  | no  | Used to describe learning circumstances rather than the learning process itself                                                    |
| learning the practice of nursing                                                                                                                                                    | yes | Used as an equivalent to learning in clinical practice <sup>6</sup>                                                                |
| learning through experience                                                                                                                                                         | yes | Used as an equivalent to learning in clinical practice                                                                             |
| learning trajectories                                                                                                                                                               | no  | Used to describe learning in a specific program <sup>7</sup>                                                                       |
| Meaningful learning                                                                                                                                                                 | no  | Used exclusively for learning in the classroom setting <sup>8</sup> or simulation learning <sup>9</sup>                            |
| Online learning                                                                                                                                                                     | no  | Used for specific learning activities outside the clinical                                                                         |

|                                                            |                  | setting                                                                                                                                                                                         |
|------------------------------------------------------------|------------------|-------------------------------------------------------------------------------------------------------------------------------------------------------------------------------------------------|
| Peer based learning/ peer learning/ peer assisted learning | yes <sup>1</sup> | Used to describe a specific central way learning in clinical practice                                                                                                                           |
| Perceptual learning                                        | no               | Used to describe a specific technique to learn in clinical practice                                                                                                                             |
| placement learning                                         | Yes              | Used as an equivalent to learning in clinical practice                                                                                                                                          |
| Practice learning                                          | Yes              | Used as an equivalent to learning in clinical practice                                                                                                                                          |
| Practice-based learning                                    | Yes              | Used as an equivalent to learning in clinical practice                                                                                                                                          |
| problem-based learning/ problem based learning             | no               | Used exclusively for learning in the classroom setting, simulation learning or online learning                                                                                                  |
| professional development                                   | No               | Used to describe the result of learning in the clinical setting, rather than the process                                                                                                        |
| Reflective learning                                        | No               | Used to describe specific teaching and learning strategies                                                                                                                                      |
| Self-directed learning                                     | yes              | Used (at least in some studies, eg <sup>10</sup> ) to describe a very important component of learning in the clinical setting, that is, the part that takes place at the learner's initiative). |
| Self-regulated learning                                    | yes              | Used (at least in some studies, eg <sup>11</sup> ) to describe a major part of learning in the clinical setting, that is, the part that takes place at the learner's initiative).               |
| Service learning                                           | no               | Used for the particular combination of providing (voluntary) community service and learning in practice                                                                                         |
| Shared learning                                            | No               | Used to describe a specific way of organizing learning in clinical practice (ie learning from and with others)                                                                                  |
| Situated learning                                          | yes              | Used as an equivalent to learning in clinical practice, <sup>12</sup>                                                                                                                           |
| socialisation/ socialization                               | yes              | Used to describe a major part of learning in clinical practice                                                                                                                                  |
| student learning                                           | yes              | Is, in some cases (eg <sup>13</sup> ) used to describe learning in clinical practice)                                                                                                           |
| task-based learning                                        | No               | Used to describe a specific way of organizing learning in clinical practice (ie around tasks <sup>14</sup> )                                                                                    |
| team-based learning                                        | No               | Used exclusively for learning in the classroom setting                                                                                                                                          |
| Transformational learning                                  | No               | Used to describe the result of learning in the clinical setting, rather than the process <sup>15</sup>                                                                                          |
| Transformative learning                                    | yes <sup>2</sup> | Used to describe both process and outcomes of learning <sup>16</sup>                                                                                                                            |
| Ward based learning                                        | Yes              | Used as an equivalent to learning in clinical practice                                                                                                                                          |
| Work-based learning                                        | Yes              | Used as an equivalent to learning in clinical practice                                                                                                                                          |
| work-integrated learning                                   | Yes              | Used as an equivalent to learning in clinical practice                                                                                                                                          |

<sup>1</sup> Excluded in first instance as it appeared to be used to study interventions or specific organizational models. On the basis of results in search step 2, the concept was included in second instance.

<sup>2</sup> Excluded in first instance as it appeared to be used to study classroom learning only. On the basis of results in search step 2, the concept was included in second instance.

|                    |     |                                                        |
|--------------------|-----|--------------------------------------------------------|
| workplace learning | Yes | Used as an equivalent to learning in clinical practice |
|--------------------|-----|--------------------------------------------------------|
