# Supplementary material for: How do undergraduate nursing students learn in the hospital setting? A scoping review of conceptualisations, operationalisations and learning activities
Source: PubMed Central journal article supplement — BMJ Open. 2019 Dec 8;9(12):e029397. doi: 10.1136/bmjopen-2019-029397 (PMC6924761; doi:10.1136/bmjopen-2019-029397), 2019-12-08
Supplement: bmjopen-2019-029397supp005.pdf [file bmjopen-2019-029397supp005.pdf]

## Supplementary file 5. Excluded full text articles and main reason for exclusion

|     |                                                                                                                                                              |
|-----|--------------------------------------------------------------------------------------------------------------------------------------------------------------|
| 1.  | Not been able to retrieve full text of this study                                                                                                            |
| 2.  | Study is about influencing factors, interventions, organizational models, personal characteristics affecting learning instead of the learning process itself |
| 3.  | Study is not about learning/ not possible to separate findings about learning from other findings                                                            |
| 4.  | No original study or review                                                                                                                                  |
| 5.  | Study is incomplete (eg no results)                                                                                                                          |
| 6.  | Study is about a research methodology                                                                                                                        |
| 7.  | Another study within the same project is already included, this study offers no additional findings                                                          |
| 8.  | Study is too specific                                                                                                                                        |
| 9.  | Study is not about clinical practice/ not possible to separate findings about clinical practice from other findings                                          |
| 10. | Study is not about nursing students/not about hospital setting                                                                                               |

|                                                        | 1 | 2 | 3 | 4 | 5 | 6 | 7 | 8 | 9 | 10 |
|--------------------------------------------------------|---|---|---|---|---|---|---|---|---|----|
| Abe (1977)                                             | x |   |   |   |   |   |   |   |   |    |
| Allan, Smith, and O'Driscoll (2011)                    |   | x |   |   |   |   |   |   |   |    |
| Alves and Cogo (2014)                                  |   |   | x |   |   |   |   |   |   |    |
| Andrade Bezerra, Soares Campos, and Da Silveira (2005) | x |   |   |   |   |   |   |   |   |    |
| Arlton and Miercort (1980)                             |   |   |   | x |   |   |   |   |   |    |
| Arrigoni et al. (2017)                                 |   |   |   | x |   |   |   |   |   |    |
| Baldwin, Mills, Birks, and Budden (2014)               |   | x |   |   |   |   |   |   |   |    |
| Barry, Ward, and Walter (2017)                         |   |   |   |   |   | x |   |   |   |    |
| Brackenreg (2004)                                      |   | x |   |   |   |   |   |   |   |    |
| Burnard (1991)                                         |   |   |   | x |   |   |   |   |   |    |
| Burnard (1992)                                         |   |   |   |   |   |   | x |   |   |    |
| Charneia (2007)                                        | x |   |   |   |   |   |   |   |   |    |
| Coetzee (2004)                                         |   |   |   |   |   |   |   | x |   |    |
| Cope, Cuthbertson, and Stoddart (2000)                 |   | x |   |   |   |   |   |   |   |    |
| Corbett (1973)                                         |   | x |   |   |   |   |   |   |   |    |
| Cowman (1998)                                          |   | x |   |   |   |   |   |   |   |    |
| Crouch (1991)                                          | x |   |   |   |   |   |   |   |   |    |
| Cullingford (1991)                                     | x |   |   |   |   |   |   |   |   |    |
| de Jesus, Sena, and Andrade (2014)                     |   |   |   |   |   |   |   |   | x |    |
| de Jesus et al. (2014)                                 |   | x |   |   |   |   |   |   |   |    |
| Durgante Alves and Petersen Cogo (2015)                |   |   | x |   |   |   |   |   |   |    |
| Edwards (2013)                                         |   |   |   |   |   | x |   |   |   |    |
| Egginton (2002)                                        | x |   |   |   |   |   |   |   |   |    |
| Endacott, Scholes, Freeman, and Cooper (2003)          |   | x |   |   |   |   |   |   |   |    |
| Evans (1987)                                           |   |   |   | x |   |   |   |   |   |    |
| Friedman (1981)                                        | x |   |   |   |   |   |   |   |   |    |
| Green and Holloway (1997)                              |   |   |   |   |   | x |   |   |   |    |
| Hauge (1999)                                           | x |   |   |   |   |   |   |   |   |    |
| Hauge (1999)                                           | x |   |   |   |   |   |   |   |   |    |
| Henderson et al. (2018)                                |   | x |   |   |   |   |   |   |   |    |
| Henderson et al. (2018)                                | x |   |   |   |   |   |   |   |   |    |
| Hill (2016)                                            |   |   | x |   |   |   |   |   |   |    |
| Hold, Blake, and Ward (2015)                           |   |   |   |   |   |   |   |   | x |    |
| Holmsen (2010)                                         |   | x |   |   |   |   |   |   |   |    |
| Ironside, McNelis, and Ebright (2014)                  |   |   | x |   |   |   |   |   |   |    |

|                                                                                           |   |   |  |   |  |  |   |  |   |   |
|-------------------------------------------------------------------------------------------|---|---|--|---|--|--|---|--|---|---|
| Kosowski (1995)                                                                           |   |   |  |   |  |  |   |  | x |   |
| Kuiper (2004)                                                                             |   | x |  |   |  |  |   |  |   |   |
| Levett-Jones (2007)                                                                       |   |   |  | x |  |  |   |  |   |   |
| Love (1996)                                                                               |   | x |  |   |  |  |   |  |   |   |
| MacFarlane and Hart (1995).                                                               |   |   |  | x |  |  |   |  |   |   |
| May and Veitch (1998)                                                                     |   | x |  |   |  |  |   |  |   |   |
| Montagna, Benaglio, and Zannini (2010)                                                    |   | x |  |   |  |  |   |  |   |   |
| More and Conklin (1995)                                                                   |   | x |  |   |  |  |   |  |   |   |
| Newton, Billett, and Ockerby (2009)                                                       |   | x |  |   |  |  |   |  |   |   |
| Nolan (1998)                                                                              |   |   |  | x |  |  |   |  |   |   |
| O'Shea (2003)                                                                             |   |   |  |   |  |  |   |  | x |   |
| Paliadelis and Wood (2016)                                                                |   | x |  |   |  |  |   |  |   |   |
| Papp, Markkanen, and Von Bonsdorff (2001)                                                 | x |   |  |   |  |  |   |  |   |   |
| Poliifroni, Packard, Shah, and MacAvoy (1995)                                             |   |   |  | x |  |  |   |  |   |   |
| Rajeswaran (2016)                                                                         |   | x |  |   |  |  |   |  |   |   |
| Reutter, Field, Campbell, and Day (1997)                                                  |   |   |  | x |  |  |   |  |   |   |
| Rodríguez García, Ruiz López, González Sanz, Fernández Trinidad, and De Blas Gómez (2014) |   |   |  | x |  |  |   |  |   |   |
| Sandvik et al. (2012)                                                                     |   | x |  |   |  |  |   |  |   |   |
| Shahsavari, Zare, Parsa-Yekta, Griffiths, and Vaismoradi (2018)                           |   |   |  | x |  |  |   |  |   |   |
| Shin (2000)                                                                               |   |   |  |   |  |  |   |  |   | x |
| Shirazi, Sharif, Molazem, and Alborzi (2017)                                              |   |   |  |   |  |  |   |  | x |   |
| Skaalvik, Normann, and Henriksen (2010)                                                   |   | x |  |   |  |  |   |  |   |   |
| Smith and Morrison (2006).                                                                |   |   |  |   |  |  |   |  |   | x |
| Spouse (2001)                                                                             |   |   |  | x |  |  |   |  |   |   |
| Tagliareni (1991)                                                                         | x |   |  |   |  |  |   |  |   |   |
| Thrysoe, Hounsgaard, Dohn, and Wagner (2010).                                             |   |   |  | x |  |  |   |  |   |   |
| Tupala, Tossavainen, and Turunen (2004)                                                   |   |   |  |   |  |  |   |  |   | x |
| Vesanto and Munnukka (1996)                                                               | x |   |  |   |  |  |   |  |   |   |
| Wilson (1994)                                                                             |   |   |  | x |  |  |   |  |   |   |
| Wong and Lee (2000)                                                                       |   |   |  |   |  |  |   |  |   | x |
| Zhao, Kuan, Chung, Chan, and Li (2018).                                                   |   |   |  |   |  |  | x |  |   |   |

- Abe, Y. (1977). [The nursing student in the hospital ward--her activities and learning process]. *Kango Tenbo*, 2(10), 18-22.
- Allan, H. T., Smith, P., & O'Driscoll, M. (2011). Experiences of supernumerary status and the hidden curriculum in nursing: a new twist in the theory-practice gap? *J Clin Nurs*, 20(5-6), 847-855. doi:10.1111/j.1365-2702.2010.03570.x
- Alves, E. A., & Cogo, A. L. (2014). [Nursing students' perception of the learning process in a hospital setting]. *Rev Gaucha Enferm*, 35(1), 102-109.
- Andrade Bezerra, M. G., Soares Campos, A. D., & Da Silveira, I. P. (2005). Teaching learning: critical view of nursing undergraduate students. *Enfermagem Atual*, 5(25), 23-26.
- Arlton, D. M., & Miercort, O. S. (1980). A nursing clinic: the challenge for student learning opportunities. *J Nurs Educ*, 19(1), 53-58.
- Arrigoni, C., Grugnetti, A. M., Caruso, R., Gallotti, M. L., Borrelli, P., & Puci, M. (2017). Nursing students' clinical competencies: a survey on clinical education objectives. *Ann Ig*, 29(3), 179-188. doi:10.7416/ai.2017.2145
- Baldwin, A., Mills, J., Birks, M., & Budden, L. (2014). Role modeling in undergraduate nursing education: an integrative literature review. *Nurse Educ Today*, 34(6), e18-26. doi:10.1016/j.nedt.2013.12.007

- Barry, S., Ward, L., & Walter, R. (2017). Exploring Nursing Students' Experiences of Learning Using Phenomenography: A Literature Review. *J Nurs Educ*, *56*(10), 591-598. doi:10.3928/01484834-20170918-03
- Brackenreg, J. (2004). Issues in reflection and debriefing: how nurse educators structure experiential activities. *Nurse Educ Pract*, *4*(4), 264-270. doi:10.1016/j.nepr.2004.01.005
- Burnard, P. (1991). Perceptions of experiential learning. *Nurs Times*, *87*(8), 47.
- Burnard, P. (1992). Defining experiential learning: nurse tutors' perceptions. *Nurse Educ Today*, *12*(1), 29-36.
- Charneia, E. (2007). Nursing students' perceptions of role modeling as it relates to learning in the clinical environment. *Ph.D.*, 307 p-307 p.
- Coetzee, M. (2004). Learning to nurse children: towards a model for nursing students. *J Adv Nurs*, *47*(6), 639-648. doi:10.1111/j.1365-2648.2004.03152.x
- Cope, P., Cuthbertson, P., & Stoddart, B. (2000). Situated learning in the practice placement. *J Adv Nurs*, *31*(4), 850-856.
- Corbett, D. (1973). Student nurses share in clinical learning. *Can Nurse*, *69*(11), 21.
- Cowman, S. (1998). The approaches to learning of student nurses in the Republic of Ireland and Northern Ireland. *J Adv Nurs*, *28*(4), 899-910.
- Crouch, S. (1991). The value of clinical learning. *Nursing (Lond)*, *4*(32), 9-11.
- Cullingford, S. (1991). Learning from experience. *Senior Nurse*, *11*(6), 25-28.
- de Jesus, I. S., Sena, E. L., & Andrade, L. M. (2014). Learning in the informal spaces and re-signification of the existence of undergraduate students of nursing. *Rev Lat Am Enfermagem*, *22*(5), 731-738.
- Durgante Alves, E. A. T., & Petersen Cogo, A. L. (2015). NURSING STUDENTS' PERCEPTION OF THE LEARNING PROCESS IN A HOSPITAL SETTING. *Rev Gaucha Enferm*, *36*(1), 102-109. doi:10.1590/1983-1447.2014.01.42870
- Edwards, S. L. (2013). Learning from Practice: the Value of Story in Nurse Education. *Ph.D.*, N.PAG p-N.PAG p.
- Egginton, D. (2002). Learning from experience: a first-year student reflects. *Paediatr Nurs*, *14*(10), 30-31.
- Endacott, R., Scholes, J., Freeman, M., & Cooper, S. (2003). The reality of clinical learning in critical care settings: a practitioner:student gap? *J Clin Nurs*, *12*(5), 778-785.
- Evans, N. (1987). Quest: Learning from experience. *Nurs Times*, *83*(42), 49-50.
- Friedman, F. B. (1981). Learning by doing. *J Pract Nurs*, *31*(6), 20-23.
- Green, A. J., & Holloway, D. G. (1997). Using a phenomenological research technique to examine student nurses' understandings of experiential teaching and learning: a critical review of methodological issues. *J Adv Nurs*, *26*(5), 1013-1019.
- Hauge, K. W. (1999). To perceive and to be perceived. *Nordic Journal of Nursing Research & Clinical Studies / Vård i Norden*, *19*(2), 37-41.
- Henderson, A., Harrison, P., Rowe, J., Edwards, S., Barnes, M., Henderson, S., & Henderson, A. (2018). Students take the lead for learning in practice: A process for building self-efficacy into undergraduate nursing education. *Nurse Educ Pract*, *31*, 14-19. doi:10.1016/j.nepr.2018.04.003
- Hill, L. A. (2016). Telling their stories: Using Appreciative Inquiry to explore the lived experience of students in clinical nursing education. *Telling Their Stories: Using Appreciative Inquiry to Explore the Lived Experience of Students in Clinical Nursing Education*, 1-1.
- Hold, J. L., Blake, B. J., & Ward, E. N. (2015). Perceptions and experiences of nursing students enrolled in a palliative and end-of-life nursing elective: A qualitative study. *Nurse Educ Today*, *35*(6), 777-781. doi:10.1016/j.nedt.2015.02.011
- Holmsen, T. L. (2010). Influences on nursing students' confidence and learning in clinical practice. *Nordic Journal of Nursing Research & Clinical Studies / Vård i Norden*, *30*(1), 24-28.
- Ironside, P. M., McNelis, A. M., & Ebright, P. (2014). Clinical education in nursing: rethinking learning in practice settings. *Nurs Outlook*, *62*(3), 185-191. doi:10.1016/j.outlook.2013.12.004

- Kosowski, M. M. (1995). Clinical learning experiences and professional nurse caring: a critical phenomenological study of female baccalaureate nursing students. *J Nurs Educ*, *34*(5), 235-242.
- Kuiper, R. A. (2004). Nursing reflections from journaling during a perioperative internship. *Aorn j*, *79*(1), 195-198, 201-196, 209-112 passim.
- Levett-Jones, T. L. (2007). Facilitating reflective practice and self-assessment of competence through the use of narratives. *Nurse Educ Pract*, *7*(2), 112-119. doi:10.1016/j.nepr.2006.10.002
- Love, C. (1996). Using a diary to learn the patient's perspective. *Prof Nurse*, *11*(5), 286-288.
- MacFarlane, E., & Hart, J. D. (1995). Self-directed learning experiences for senior BScN students. *Can Nurse*, *91*(10), 17.
- May, N., & Veitch, L. (1998). Working to learn and learning to work: placement experience of Project 2000 nursing students in Scotland. *Nurse Educ Today*, *18*(8), 630-636.
- Montagna, L., Benaglio, C., & Zannini, L. (2010). [Reflective writing in nursing education: background, experiences and methods]. *Assist Inferm Ric*, *29*(3), 140-152.
- More, P., & Conklin, J. (1995). Investigating student learning: the Katz-Henry model. *J Nurs Educ*, *34*(3), 143-144.
- Newton, J. M., Billett, S., & Ockerby, C. M. (2009). Journeying through clinical placements--an examination of six student cases. *Nurse Educ Today*, *29*(6), 630-634. doi:10.1016/j.nedt.2009.01.009
- Nolan, C. A. (1998). Learning on clinical placement: the experience of six Australian student nurses. *Nurse Educ Today*, *18*(8), 622-629.
- O'Shea, E. (2003). Self-directed learning in nurse education: a review of the literature. *J Adv Nurs*, *43*(1), 62-70.
- Paliadelis, P., & Wood, P. (2016). Learning from clinical placement experience: Analysing nursing students' final reflections in a digital storytelling activity. *Nurse Educ Pract*, *20*, 39-44. doi:10.1016/j.nepr.2016.06.005
- Papp, I., Markkanen, M., & Von Bonsdorff, M. (2001). Student, teacher, mentor -- student nurses learning experiences in clinical practice. *Sairaanhoitaja*, *74*(8), 26-29.
- Polifroni, E. C., Packard, S. A., Shah, H. S., & MacAvoy, S. (1995). Activities and interactions of baccalaureate nursing students in clinical practice. *J Prof Nurs*, *11*(3), 161-169.
- Rajeswaran, L. (2016). Clinical Experiences of Nursing Students at a Selected Institute of Health Sciences in Botswana. *Health Science Journal*, *10*(6), 1-6. doi:10.21767/1791-809X.1000471
- Reutter, L., Field, P. A., Campbell, I. E., & Day, R. (1997). Socialization into nursing: nursing students as learners. *J Nurs Educ*, *36*(4), 149-155.
- Rodríguez García, M., Ruiz López, M., González Sanz, P., Fernández Trinidad, M., & De Blas Gómez, I. (2014). Life experiences of the student nursing 4th in the practicum. *Cultura de los Cuidados*, *18*(38), 25-33.
- Sandvik, A.-H., Melender, H.-L., Jonsén, E., Jönsson, G., Salmu, M., & Hilli, Y. (2012). Nursing students' experiences of the first clinical education-a nordic quantitative study. *Nordic Journal of Nursing Research & Clinical Studies / Vård i Norden*, *32*(3), 20-25.
- Shahsavari, H., Zare, Z., Parsa-Yekta, Z., Griffiths, P., & Vaismoradi, M. (2018). Learning Situations in Nursing Education: A Concept Analysis. *Res Theory Nurs Pract*, *32*(1), 23-45. doi:10.1891/0000-000y.32.1.23
- Shin, K. R. (2000). The meaning of the clinical learning experience in Korean nursing students. *Journal of Nursing Education*, *39*(6), 259-265.
- Shirazi, F., Sharif, F., Molazem, Z., & Alborzi, M. (2017). Dynamics of self-directed learning in M.Sc. nursing students: A qualitative research. *J Adv Med Educ Prof*, *5*(1), 33-41.
- Skaalvik, M. W., Normann, H. K., & Henriksen, N. (2010). To what extent does the oral shift report stimulate learning among nursing students? A qualitative study\*. *J Clin Nurs*, *19*(15-16), 2300-2308. doi:10.1111/j.1365-2702.2010.03217.x
- Smith, P., & Morrison, J. (2006). Clinical clerkships: students can structure their own learning. *Med Educ*, *40*(9), 884-892. doi:10.1111/j.1365-2929.2006.02546.x

- Spouse, J. (2001). Workplace learning: pre-registration nursing students' perspectives. *Nurse Educ Pract*, 1(3), 149-156. doi:10.1054/nepr.2001.0024
- Tagliareni, E. (1991). What and how of student learning activities. *NLN Publ*(15-2411), 65-91.
- Thrysoe, L., Hounsgaard, L., Dohn, N. B., & Wagner, L. (2010). Participating in a community of practice as a prerequisite for becoming a nurse - Trajectories as final year nursing students. *Nurse Educ Pract*, 10(6), 361-366. doi:10.1016/j.nepr.2010.05.004
- Tupala, M., Tossavainen, K., & Turunen, H. (2004). PHN students' target levels of competencies in children and adolescents' nursing. *Hoitotiede*, 16(3), [98]-110.
- Vesanto, A., & Munnukka, T. (1996). Work as student primary nurse in promoting professional skills of student nurses. *Hoitotiede*, 8(1), 20-28.
- Wilson, M. E. (1994). Nursing student perspective of learning in a clinical setting. *J Nurs Educ*, 33(2), 81-86.
- Wong, F. K. Y., & Lee, W. M. (2000). A phenomenological study of early nursing experiences in Hong Kong. *J Adv Nurs*, 31(6), 1509-1517. doi:10.1046/j.1365-2648.2000.01433.x
- Zhao, Y., Kuan, H. K., Chung, J. O. K., Chan, C. K. Y., & Li, W. H. C. (2018). Students' approaches to learning in a clinical practicum: A psychometric evaluation based on item response theory. *Nurse Educ Today*, 66, 179-186. doi:10.1016/j.nedt.2018.04.015
